# Supplementary material for: Heart disease severity level identification system on Hyperledger consortium network
Source: PeerJ Comput Sci. 2023 Oct 12;9:e1626. doi: 10.7717/peerj-cs.1626 (PMC10588697; doi:10.7717/peerj-cs.1626)
Supplement: Supplemental Information 2 — Health record details. The patient is identified using the record id attribute. When identifying an organization, the hospital attribute is used. Details about the recommended medications are stored in the planned medicines column. [file peerj-cs-09-1626-s002.xlsx]

## Sheet: Sheet1
record_id	Hospital	patient	doctor	previous_problems	previous_medication_history	visited_date_and_time	lab_tests_taken	report_id	current_problems	planned_medications	other_details
ehrid440	Hospital1	patient440	doctor1	Diarrhea	Loperamide, Bismuth	2020-04-02 16:03:40	Blood test,stool test,Clostridium difficile toxin test	rid440	infections, travelers' diarrhea	subsalicylate	Avoid Dairy Products, Spicy Foods And All Citrus Foods And Alcohol.
ehrid52	Hospital1	patient52	doctor1	Lung Cancer	Afinitor Disperz	2021-05-23 21:47:50	PET-CT scan,Chest X-ray	rid52	Lung Cancer	Everolimus	Avoid Smoking Or passive Smoking.
ehrid1560	Hospital1	patient1560	doctor1	Diarrhea	Loperamide, Bismuth	2022-12-03 09:45:04	Blood test,stool test,Clostridium difficile toxin test	rid1560	infections, travelers' diarrhea	subsalicylate	Avoid Dairy Products, Spicy Foods And All Citrus Foods And Alcohol.
ehrid1315	Hospital2	patient1315	doctor2	Diarrhea	Loperamide, Bismuth	2021-09-18 16:06:09	Blood test,stool test,Clostridium difficile toxin test	rid1315	infections, travelers' diarrhea	subsalicylate	Avoid Dairy Products, Spicy Foods And All Citrus Foods And Alcohol.
ehrid194	Hospital1	patient194	doctor1	Common Cold	acetaminophen (Tylenol)	2022-06-13 16:06:26	No lab tests exist	rid194	Common Cold	acetaminophen	Wash Your Hands Often, Avoid Touching Your Face, Don't Smoke And Maintain A Healthy Life Style.
ehrid1042	Hospital1	patient1042	doctor1	Diarrhea	Loperamide, Bismuth	2021-05-15 08:54:09	Blood test,stool test,Clostridium difficile toxin test	rid1042	infections, travelers' diarrhea	subsalicylate	Avoid Dairy Products, Spicy Foods And All Citrus Foods And Alcohol.
ehrid497	Hospital2	patient497	doctor2	Common Cold	acetaminophen (Tylenol)	2020-04-28 00:10:00	No lab tests exist	rid497	Common Cold	acetaminophen	Wash Your Hands Often, Avoid Touching Your Face, Don't Smoke And Maintain A Healthy Life Style.
ehrid624	Hospital1	patient624	doctor1	Cirrhosis	ursodiol	2019-01-17 18:05:20	liver biopsy	rid624	Cirrhosis	ursodiol	Eat Foods Like Lean Protein Poultry Or Fish, Strictly Avoid Alcohol.
ehrid1232	Hospital1	patient1232	doctor1	Tuberculosis	Rifater >600mg	2019-07-02 04:54:50	Rapid Sputum Test,T-Spot	rid1232	Tuberculosis	Isoniazid INH pills for 6/9 months	Skip Tobacco In All Forms , Don't Consume Alchohol And Limit Caffeinated Drinks.
ehrid511	Hospital2	patient511	doctor2	Common Cold	acetaminophen (Tylenol)	2020-08-27 18:11:05	No lab tests exist	rid511	Common Cold	acetaminophen	Wash Your Hands Often, Avoid Touching Your Face, Don't Smoke And Maintain A Healthy Life Style.
ehrid1577	Hospital2	patient1577	doctor2	Malaria	Chloroquine phosphate	2022-12-25 00:58:37	Malaria Rapid Diagnostic Test	rid1577	Malaria	Artemether/Lumfantrine Treatment	Drink Plenty Of Water, Control Fats Intake, Consume Ripe Papaya, Sweet Lime, Grapes Which Are Rich in Vitamin C
ehrid1179	Hospital2	patient1179	doctor2	Asthma	Combination inhalers	2019-06-27 07:57:39	FeNO test, spirometry	rid1179	Asthma	Theophylline -2 Nos	Avoid Smoke of Any Type, Control Asthma Triggers.
ehrid1377	Hospital2	patient1377	doctor2	Asthma	Combination inhalers	2020-12-03 04:08:15	FeNO test, spirometry	rid1377	Asthma	Theophylline -2 Nos	Avoid Smoke of Any Type, Control Asthma Triggers.
ehrid685	Hospital2	patient685	doctor2	Common Cold	acetaminophen (Tylenol)	2022-07-20 12:46:59	No lab tests exist	rid685	Common Cold	acetaminophen	Wash Your Hands Often, Avoid Touching Your Face, Don't Smoke And Maintain A Healthy Life Style.
ehrid883	Hospital2	patient883	doctor2	Common Cold	acetaminophen (Tylenol)	2021-02-17 02:54:18	No lab tests exist	rid883	Common Cold	acetaminophen	Wash Your Hands Often, Avoid Touching Your Face, Don't Smoke And Maintain A Healthy Life Style.
ehrid153	Hospital2	patient153	doctor2	Asthma	Combination inhalers	2019-11-30 08:08:27	FeNO test, spirometry	rid153	Asthma	Theophylline -2 Nos	Avoid Smoke of Any Type, Control Asthma Triggers.
ehrid1670	Hospital1	patient1670	doctor1	Diarrhea	Loperamide, Bismuth	2020-04-02 07:03:34	Blood test,stool test,Clostridium difficile toxin test	rid1670	infections, travelers' diarrhea	subsalicylate	Avoid Dairy Products, Spicy Foods And All Citrus Foods And Alcohol.
ehrid2019	Hospital2	patient2019	doctor2	Diarrhea	Loperamide, Bismuth	2020-06-08 21:51:58	Blood test,stool test,Clostridium difficile toxin test	rid2019	infections, travelers' diarrhea	subsalicylate	Avoid Dairy Products, Spicy Foods And All Citrus Foods And Alcohol.
ehrid244	Hospital1	patient244	doctor1	Common Cold	acetaminophen (Tylenol)	2021-04-04 12:00:58	No lab tests exist	rid244	Common Cold	acetaminophen	Wash Your Hands Often, Avoid Touching Your Face, Don't Smoke And Maintain A Healthy Life Style.
ehrid1162	Hospital1	patient1162	doctor1	Stroke	Aspirin 75mg,tPA	2020-02-28 19:00:52	CT ,MRI,Echocardiogram	rid1162	Stroke	clopidogrel,dipyridamole	Avoid Sugar, Salt, Highly Processed Foods, Saturated And Trans Fats And Fried Foods.
ehrid2241	Hospital2	patient2241	doctor2	Heart Disease	Aspirin 75mg,Pain Relieavers	2019-08-18 06:10:17	ECG,Blood Test,CT,MRI	rid2237	Heart Disease and Hypertension	thrombolytics	Regular Physical Activity - Success 30 Minutes A Day, Avoid Saturated And Trans Fat And Fried Foods, As Well As Snacky-Type Foods.
ehrid92	Hospital1	patient92	doctor1	Common Cold	acetaminophen (Tylenol)	2022-06-04 20:30:19	No lab tests exist	rid92	Common Cold and Fever	acetaminophen	Wash Your Hands Often, Avoid Touching Your Face, Don't Smoke And Maintain A Healthy Life Style.
ehrid1100	Hospital1	patient1100	doctor1	Fever	paracetamol 500mg	2019-07-22 08:35:02	Blood Test and Urine Test	rid1100	Fever	Acetaminophen injection	Avoid Caffeine And Alcohol, Stay Hydrated, Have Ample Amount Of Rest.
ehrid866	Hospital1	patient866	doctor1	Common Cold	acetaminophen (Tylenol)	2020-10-07 07:49:23	No lab tests exist	rid866	Common Cold	acetaminophen	Wash Your Hands Often, Avoid Touching Your Face, Don't Smoke And Maintain A Healthy Life Style.
ehrid1626	Hospital1	patient1626	doctor1	Diarrhea	Loperamide, Bismuth	2021-12-19 10:32:05	Blood test,stool test,Clostridium difficile toxin test	rid1626	infections, travelers' diarrhea	subsalicylate	Avoid Dairy Products, Spicy Foods And All Citrus Foods And Alcohol.
ehrid42	Hospital1	patient42	doctor1	Stomach Cancer	5-FU (fluorouracil) and leucovorin (folinic acid)	2021-09-14 08:03:08	Upper endoscopy	rid42	Stomach Cancer	chemotherapy	Choose Low-Fat Diary Products, Protien-Rich Foods.
ehrid1878	Hospital1	patient1878	doctor1	Diarrhea	Loperamide, Bismuth	2019-03-31 06:16:46	Blood test,stool test,Clostridium difficile toxin test	rid1878	infections, travelers' diarrhea	subsalicylate	Avoid Dairy Products, Spicy Foods And All Citrus Foods And Alcohol.
ehrid1288	Hospital1	patient1288	doctor1	Common Cold	acetaminophen (Tylenol)	2022-10-05 04:47:17	No lab tests exist	rid1288	Common Cold	acetaminophen	Wash Your Hands Often, Avoid Touching Your Face, Don't Smoke And Maintain A Healthy Life Style.
ehrid1507	Hospital2	patient1507	doctor2	Diabetes	Metformin 250mg -2 Nos	2021-08-06 16:11:38	HbA1C,Fasting Blood Sugar Test	rid1507	Diabetes	Metformin 750mg -2 Nos	Regular Physical Activity - Success 30 Minutes A Day, Avoid Sugar, Ready To Eat Foods.
ehrid2076	Hospital1	patient2076	doctor1	Cirrhosis	ursodiol	2020-11-28 18:08:27	liver biopsy	rid2076	Cirrhosis	ursodiol	Eat Foods Like Lean Protein Poultry Or Fish, Strictly Avoid Alcohol.
ehrid1379	Hospital2	patient1379	doctor2	Diarrhea	Loperamide, Bismuth	2022-09-13 11:55:54	Blood test,stool test,Clostridium difficile toxin test	rid1379	infections, travelers' diarrhea	subsalicylate	Avoid Dairy Products, Spicy Foods And All Citrus Foods And Alcohol.
ehrid844	Hospital1	patient844	doctor1	Common Cold	acetaminophen (Tylenol)	2020-03-12 08:06:01	No lab tests exist	rid844	Common Cold	acetaminophen	Wash Your Hands Often, Avoid Touching Your Face, Don't Smoke And Maintain A Healthy Life Style.
ehrid1483	Hospital2	patient1483	doctor2	Diarrhea	Loperamide, Bismuth	2021-02-02 11:11:18	Blood test,stool test,Clostridium difficile toxin test	rid1483	infections, travelers' diarrhea	subsalicylate	Avoid Dairy Products, Spicy Foods And All Citrus Foods And Alcohol.
ehrid1052	Hospital1	patient1052	doctor1	Diarrhea	Loperamide, Bismuth	2022-09-13 00:06:15	Blood test,stool test,Clostridium difficile toxin test	rid1052	infections, travelers' diarrhea	subsalicylate	Avoid Dairy Products, Spicy Foods And All Citrus Foods And Alcohol.
ehrid2265	Hospital2	patient2265	doctor2	Heart Disease	Aspirin 75mg,Pain Relieavers	2020-08-08 10:55:54	ECG,Blood Test,CT,MRI	rid2235	Heart Disease and Hypertension	thrombolytics	Regular Physical Activity - Success 30 Minutes A Day, Avoid Saturated And Trans Fat And Fried Foods, As Well As Snacky-Type Foods.
ehrid2018	Hospital1	patient2018	doctor1	Diarrhea	Loperamide, Bismuth	2019-09-16 22:53:13	Blood test,stool test,Clostridium difficile toxin test	rid2018	infections, travelers' diarrhea	subsalicylate	Avoid Dairy Products, Spicy Foods And All Citrus Foods And Alcohol.
ehrid1784	Hospital1	patient1784	doctor1	Diarrhea	Loperamide, Bismuth	2019-07-28 10:56:25	Blood test,stool test,Clostridium difficile toxin test	rid1784	infections, travelers' diarrhea	subsalicylate	Avoid Dairy Products, Spicy Foods And All Citrus Foods And Alcohol.
ehrid946	Hospital1	patient946	doctor1	Diabetes	Metformin 250mg -2 Nos	2019-04-16 23:48:30	HbA1C,Fasting Blood Sugar Test	rid946	Diabetes	Metformin 750mg -2 Nos	Regular Physical Activity - Success 30 Minutes A Day, Avoid Sugar, Ready To Eat Foods.
ehrid2103	Hospital2	patient2103	doctor2	Heart Disease	Aspirin 75mg,Pain Relieavers	2019-04-17 13:29:31	ECG,Blood Test,CT,MRI	rid2267	Heart Disease and Hypertension	thrombolytics	Regular Physical Activity - Success 30 Minutes A Day, Avoid Saturated And Trans Fat And Fried Foods, As Well As Snacky-Type Foods.
ehrid723	Hospital2	patient723	doctor2	Common Cold	acetaminophen (Tylenol)	2019-01-02 09:48:38	No lab tests exist	rid723	Common Cold	acetaminophen	Wash Your Hands Often, Avoid Touching Your Face, Don't Smoke And Maintain A Healthy Life Style.
ehrid979	Hospital2	patient979	doctor2	Diabetes	Metformin 250mg -2 Nos	2019-11-05 00:44:05	HbA1C,Fasting Blood Sugar Test	rid979	Diabetes	Metformin 750mg -2 Nos	Regular Physical Activity - Success 30 Minutes A Day, Avoid Sugar, Ready To Eat Foods.
ehrid1001	Hospital2	patient1001	doctor2	Lung Cancer	Afinitor Disperz	2022-01-28 09:01:44	PET-CT scan,Chest X-ray	rid1001	Lung Cancer	Everolimus	Avoid Smoking Or passive Smoking.
ehrid2231	Hospital1	patient2231	doctor2	Heart Disease	Aspirin 75mg,Pain Relieavers	2021-03-13 18:55:53	ECG,Blood Test,CT,MRI	rid2138	Heart Disease and Hypertension	thrombolytics	Regular Physical Activity - Success 30 Minutes A Day, Avoid Saturated And Trans Fat And Fried Foods, As Well As Snacky-Type Foods.
ehrid1505	Hospital2	patient1505	doctor2	Diarrhea	Loperamide, Bismuth	2019-05-04 16:55:01	Blood test,stool test,Clostridium difficile toxin test	rid1505	infections, travelers' diarrhea	subsalicylate	Avoid Dairy Products, Spicy Foods And All Citrus Foods And Alcohol.
ehrid1864	Hospital1	patient1864	doctor1	Diarrhea	Loperamide, Bismuth	2019-11-12 05:21:54	Blood test,stool test,Clostridium difficile toxin test	rid1864	infections, travelers' diarrhea	subsalicylate	Avoid Dairy Products, Spicy Foods And All Citrus Foods And Alcohol.
ehrid1603	Hospital2	patient1603	doctor2	Diarrhea	Loperamide, Bismuth	2020-08-26 09:46:49	Blood test,stool test,Clostridium difficile toxin test	rid1603	infections, travelers' diarrhea	subsalicylate	Avoid Dairy Products, Spicy Foods And All Citrus Foods And Alcohol.
ehrid17	Hospital2	patient17	doctor2	Heart Disease	Aspirin 75mg,Pain Relieavers	2019-10-27 08:04:01	ECG,Blood Test,CT,MRI	rid17	Heart Disease and Hypertension	thrombolytics	Regular Physical Activity - Success 30 Minutes A Day, Avoid Saturated And Trans Fat And Fried Foods, As Well As Snacky-Type Foods.
ehrid688	Hospital1	patient688	doctor1	Tuberculosis	Rifater >600mg	2022-12-20 19:56:51	Rapid Sputum Test,T-Spot	rid688	Tuberculosis	Isoniazid INH pills for 6/9 months	Skip Tobacco In All Forms , Don't Consume Alchohol And Limit Caffeinated Drinks.
ehrid1943	Hospital2	patient1943	doctor2	Diarrhea	Loperamide, Bismuth	2020-11-06 21:38:41	Blood test,stool test,Clostridium difficile toxin test	rid1943	infections, travelers' diarrhea	subsalicylate	Avoid Dairy Products, Spicy Foods And All Citrus Foods And Alcohol.
ehrid1872	Hospital1	patient1872	doctor1	HIV/AIDS	antiretroviral therapy (ART)	2019-02-28 02:28:30	Antigen/antibody tests	rid1872	HIV/AIDS	antiretroviral therapy	Do Not Shoot Drugs, Avoid Sex And Do Not Breastfeed And Follow Balanced Diet.
ehrid644	Hospital1	patient644	doctor1	Common Cold	acetaminophen (Tylenol)	2021-08-27 07:27:30	No lab tests exist	rid644	Common Cold	acetaminophen	Wash Your Hands Often, Avoid Touching Your Face, Don't Smoke And Maintain A Healthy Life Style.
ehrid548	Hospital1	patient548	doctor1	Common Cold	acetaminophen (Tylenol)	2020-02-13 05:12:37	No lab tests exist	rid548	Common Cold	acetaminophen	Wash Your Hands Often, Avoid Touching Your Face, Don't Smoke And Maintain A Healthy Life Style.
ehrid33	Hospital2	patient33	doctor2	Diabetes	Metformin 250mg -2 Nos	2021-03-10 04:35:35	HbA1C,Fasting Blood Sugar Test	rid33	Diabetes and Chorestrol	Metformin 750mg -2 Nos	Regular Physical Activity - Success 30 Minutes A Day, Avoid Sugar, Ready To Eat Foods.
ehrid45	Hospital2	patient45	doctor2	Asthma	Combination inhalers	2020-02-14 18:28:53	FeNO test, spirometry	rid45	Asthma	Theophylline -2 Nos	Avoid Smoke of Any Type, Control Asthma Triggers.
ehrid2195	Hospital1	patient2195	doctor2	Heart Disease	Aspirin 75mg,Pain Relieavers	2019-12-15 04:05:05	ECG,Blood Test,CT,MRI	rid2114	Heart Disease and Hypertension	thrombolytics	Regular Physical Activity - Success 30 Minutes A Day, Avoid Saturated And Trans Fat And Fried Foods, As Well As Snacky-Type Foods.
ehrid910	Hospital1	patient910	doctor1	Diarrhea	Loperamide, Bismuth	2021-03-05 18:57:54	Blood test,stool test,Clostridium difficile toxin test	rid910	infections, travelers' diarrhea	subsalicylate	Avoid Dairy Products, Spicy Foods And All Citrus Foods And Alcohol.
ehrid1321	Hospital2	patient1321	doctor2	Diarrhea	Loperamide, Bismuth	2021-11-16 05:57:40	Blood test,stool test,Clostridium difficile toxin test	rid1321	infections, travelers' diarrhea	subsalicylate	Avoid Dairy Products, Spicy Foods And All Citrus Foods And Alcohol.
ehrid544	Hospital1	patient544	doctor1	Tuberculosis	Rifater >600mg	2020-08-25 08:22:26	Rapid Sputum Test,T-Spot	rid544	Tuberculosis	Isoniazid INH pills for 6/9 months	Skip Tobacco In All Forms , Don't Consume Alchohol And Limit Caffeinated Drinks.
ehrid1443	Hospital2	patient1443	doctor2	Lung Cancer	Afinitor Disperz	2020-10-22 17:05:37	PET-CT scan,Chest X-ray	rid1443	Lung Cancer	Everolimus	Avoid Smoking Or passive Smoking.
ehrid494	Hospital1	patient494	doctor1	Malaria	Chloroquine phosphate	2019-12-11 09:19:14	Malaria Rapid Diagnostic Test	rid494	Malaria	Artemether/Lumfantrine Treatment	Drink Plenty Of Water, Control Fats Intake, Consume Ripe Papaya, Sweet Lime, Grapes Which Are Rich in Vitamin C
ehrid759	Hospital2	patient759	doctor2	Common Cold	acetaminophen (Tylenol)	2021-11-07 07:15:17	No lab tests exist	rid759	Common Cold	acetaminophen	Wash Your Hands Often, Avoid Touching Your Face, Don't Smoke And Maintain A Healthy Life Style.
ehrid1628	Hospital1	patient1628	doctor1	Diabetes	Metformin 250mg -2 Nos	2022-09-19 11:33:03	HbA1C,Fasting Blood Sugar Test	rid1628	Diabetes	Metformin 750mg -2 Nos	Regular Physical Activity - Success 30 Minutes A Day, Avoid Sugar, Ready To Eat Foods.
ehrid1931	Hospital2	patient1931	doctor2	Diarrhea	Loperamide, Bismuth	2019-02-12 00:32:01	Blood test,stool test,Clostridium difficile toxin test	rid1931	infections, travelers' diarrhea	subsalicylate	Avoid Dairy Products, Spicy Foods And All Citrus Foods And Alcohol.
ehrid2217	Hospital2	patient2217	doctor2	Heart Disease	Aspirin 75mg,Pain Relieavers	2021-06-03 07:09:44	ECG,Blood Test,CT,MRI	rid2228	Heart Disease and Hypertension	thrombolytics	Regular Physical Activity - Success 30 Minutes A Day, Avoid Saturated And Trans Fat And Fried Foods, As Well As Snacky-Type Foods.
ehrid119	Hospital2	patient119	doctor2	Heart Disease	Aspirin 75mg,Pain Relieavers	2021-10-02 21:09:09	ECG,Blood Test,CT,MRI	rid119	Heart Disease	thrombolytics	Regular Physical Activity - Success 30 Minutes A Day, Avoid Saturated And Trans Fat And Fried Foods, As Well As Snacky-Type Foods.
ehrid1428	Hospital1	patient1428	doctor1	Stomach Cancer	5-FU (fluorouracil) and leucovorin (folinic acid)	2021-02-28 05:48:31	Upper endoscopy	rid1428	Stomach Cancer	chemotherapy	Choose Low-Fat Diary Products, Protien-Rich Foods.
ehrid1400	Hospital1	patient1400	doctor1	Fever	paracetamol 500mg	2019-02-23 10:21:12	Blood Test and Urine Test	rid1400	Fever	Acetaminophen injection	Avoid Caffeine And Alcohol, Stay Hydrated, Have Ample Amount Of Rest.
ehrid1018	Hospital1	patient1018	doctor1	Diarrhea	Loperamide, Bismuth	2021-08-12 01:03:48	Blood test,stool test,Clostridium difficile toxin test	rid1018	infections, travelers' diarrhea	subsalicylate	Avoid Dairy Products, Spicy Foods And All Citrus Foods And Alcohol.
ehrid1733	Hospital2	patient1733	doctor2	Diarrhea	Loperamide, Bismuth	2020-05-21 22:46:23	Blood test,stool test,Clostridium difficile toxin test	rid1733	infections, travelers' diarrhea	subsalicylate	Avoid Dairy Products, Spicy Foods And All Citrus Foods And Alcohol.
ehrid2098	Hospital1	patient2098	doctor1	Diarrhea	Loperamide, Bismuth	2022-10-07 23:04:07	Blood test,stool test,Clostridium difficile toxin test	rid2098	infections, travelers' diarrhea	subsalicylate	Avoid Dairy Products, Spicy Foods And All Citrus Foods And Alcohol.
ehrid310	Hospital1	patient310	doctor1	Diarrhea	Loperamide, Bismuth	2020-04-28 19:12:34	Blood test,stool test,Clostridium difficile toxin test	rid310	infections, travelers' diarrhea	subsalicylate	Avoid Dairy Products, Spicy Foods And All Citrus Foods And Alcohol.
ehrid1395	Hospital2	patient1395	doctor2	Asthma	Combination inhalers	2022-02-08 06:13:15	FeNO test, spirometry	rid1395	Asthma	Theophylline -2 Nos	Avoid Smoke of Any Type, Control Asthma Triggers.
ehrid1527	Hospital2	patient1527	doctor2	Diarrhea	Loperamide, Bismuth	2022-09-17 11:53:36	Blood test,stool test,Clostridium difficile toxin test	rid1527	infections, travelers' diarrhea	subsalicylate	Avoid Dairy Products, Spicy Foods And All Citrus Foods And Alcohol.
ehrid41	Hospital2	patient41	doctor2	Common Cold	acetaminophen (Tylenol)	2020-02-20 06:55:23	No lab tests exist	rid41	Common Cold and Fever	acetaminophen	Wash Your Hands Often, Avoid Touching Your Face, Don't Smoke And Maintain A Healthy Life Style.
ehrid1508	Hospital1	patient1508	doctor1	Lung Cancer	Afinitor Disperz	2020-08-15 04:42:45	PET-CT scan,Chest X-ray	rid1508	Lung Cancer	Everolimus	Avoid Smoking Or passive Smoking.
ehrid1706	Hospital1	patient1706	doctor1	Diarrhea	Loperamide, Bismuth	2020-12-30 21:45:53	Blood test,stool test,Clostridium difficile toxin test	rid1706	infections, travelers' diarrhea	subsalicylate	Avoid Dairy Products, Spicy Foods And All Citrus Foods And Alcohol.
ehrid1193	Hospital2	patient1193	doctor2	Diarrhea	Loperamide, Bismuth	2022-03-23 02:25:26	Blood test,stool test,Clostridium difficile toxin test	rid1193	infections, travelers' diarrhea	subsalicylate	Avoid Dairy Products, Spicy Foods And All Citrus Foods And Alcohol.
ehrid157	Hospital2	patient157	doctor2	Common Cold	acetaminophen (Tylenol)	2022-09-12 00:25:54	No lab tests exist	rid157	Common Cold	acetaminophen	Wash Your Hands Often, Avoid Touching Your Face, Don't Smoke And Maintain A Healthy Life Style.
ehrid1085	Hospital2	patient1085	doctor2	Diarrhea	Loperamide, Bismuth	2021-09-24 21:06:21	Blood test,stool test,Clostridium difficile toxin test	rid1085	infections, travelers' diarrhea	subsalicylate	Avoid Dairy Products, Spicy Foods And All Citrus Foods And Alcohol.
ehrid170	Hospital1	patient170	doctor1	Diarrhea	Loperamide, Bismuth	2021-12-04 10:08:04	Blood test,stool test,Clostridium difficile toxin test	rid170	infections, travelers' diarrhea	subsalicylate	Avoid Dairy Products, Spicy Foods And All Citrus Foods And Alcohol.
ehrid2225	Hospital1	patient2225	doctor2	Heart Disease	Aspirin 75mg,Pain Relieavers	2019-09-26 20:25:33	ECG,Blood Test,CT,MRI	rid2208	Heart Disease and Hypertension	thrombolytics	Regular Physical Activity - Success 30 Minutes A Day, Avoid Saturated And Trans Fat And Fried Foods, As Well As Snacky-Type Foods.
ehrid1078	Hospital1	patient1078	doctor1	Stroke	Aspirin 75mg,tPA	2019-10-25 14:29:24	CT ,MRI,Echocardiogram	rid1078	Stroke	clopidogrel,dipyridamole	Avoid Sugar, Salt, Highly Processed Foods, Saturated And Trans Fats And Fried Foods.
ehrid1666	Hospital1	patient1666	doctor1	Heart Disease	Aspirin 75mg,Pain Relieavers	2022-08-30 02:12:33	ECG,Blood Test,CT,MRI	rid1666	Heart Disease	thrombolytics	Regular Physical Activity - Success 30 Minutes A Day, Avoid Saturated And Trans Fat And Fried Foods, As Well As Snacky-Type Foods.
ehrid885	Hospital2	patient885	doctor2	Alzheimer	Galantamine, rivastigmine	2019-08-01 20:14:37	MRI,CT	rid885	Alzheimer	donepezil	Follow Mind Diet, Should Have <4 Servings A Week Of Red Meat, Less Than A Tablespoon Of Butter A Day.
ehrid1787	Hospital2	patient1787	doctor2	Diarrhea	Loperamide, Bismuth	2021-10-25 08:34:22	Blood test,stool test,Clostridium difficile toxin test	rid1787	infections, travelers' diarrhea	subsalicylate	Avoid Dairy Products, Spicy Foods And All Citrus Foods And Alcohol.
ehrid398	Hospital1	patient398	doctor1	Common Cold	acetaminophen (Tylenol)	2020-07-05 19:05:47	No lab tests exist	rid398	Common Cold	acetaminophen	Wash Your Hands Often, Avoid Touching Your Face, Don't Smoke And Maintain A Healthy Life Style.
ehrid123	Hospital2	patient123	doctor2	Common Cold	acetaminophen (Tylenol)	2022-12-16 13:23:44	No lab tests exist	rid123	Common Cold	acetaminophen	Wash Your Hands Often, Avoid Touching Your Face, Don't Smoke And Maintain A Healthy Life Style.
ehrid1198	Hospital1	patient1198	doctor1	Diarrhea	Loperamide, Bismuth	2022-05-16 13:17:00	Blood test,stool test,Clostridium difficile toxin test	rid1198	infections, travelers' diarrhea	subsalicylate	Avoid Dairy Products, Spicy Foods And All Citrus Foods And Alcohol.
ehrid1493	Hospital2	patient1493	doctor2	Diarrhea	Loperamide, Bismuth	2021-11-18 05:09:05	Blood test,stool test,Clostridium difficile toxin test	rid1493	infections, travelers' diarrhea	subsalicylate	Avoid Dairy Products, Spicy Foods And All Citrus Foods And Alcohol.
ehrid1224	Hospital1	patient1224	doctor1	HIV/AIDS	antiretroviral therapy (ART)	2020-05-10 09:32:54	Antigen/antibody tests	rid1224	HIV/AIDS	antiretroviral therapy	Do Not Shoot Drugs, Avoid Sex And Do Not Breastfeed And Follow Balanced Diet.
ehrid1176	Hospital1	patient1176	doctor1	Stomach Cancer	5-FU (fluorouracil) and leucovorin (folinic acid)	2020-03-13 09:34:19	Upper endoscopy	rid1176	Stomach Cancer	chemotherapy	Choose Low-Fat Diary Products, Protien-Rich Foods.
ehrid503	Hospital2	patient503	doctor2	Common Cold	acetaminophen (Tylenol)	2020-03-29 14:04:17	No lab tests exist	rid503	Common Cold	acetaminophen	Wash Your Hands Often, Avoid Touching Your Face, Don't Smoke And Maintain A Healthy Life Style.
ehrid1924	Hospital1	patient1924	doctor1	Lung Cancer	Afinitor Disperz	2019-04-22 20:20:20	PET-CT scan,Chest X-ray	rid1924	Lung Cancer	Everolimus	Avoid Smoking Or passive Smoking.
ehrid1887	Hospital2	patient1887	doctor2	Heart Disease	Aspirin 75mg,Pain Relieavers	2022-07-26 16:04:45	ECG,Blood Test,CT,MRI	rid1887	Heart Disease	thrombolytics	Regular Physical Activity - Success 30 Minutes A Day, Avoid Saturated And Trans Fat And Fried Foods, As Well As Snacky-Type Foods.
ehrid879	Hospital2	patient879	doctor2	Common Cold	acetaminophen (Tylenol)	2022-11-16 18:17:43	No lab tests exist	rid879	Common Cold	acetaminophen	Wash Your Hands Often, Avoid Touching Your Face, Don't Smoke And Maintain A Healthy Life Style.
ehrid2112	Hospital2	patient2112	doctor1	Heart Disease	Aspirin 75mg,Pain Relieavers	2019-02-16 08:38:38	ECG,Blood Test,CT,MRI	rid2137	Heart Disease and Hypertension	thrombolytics	Regular Physical Activity - Success 30 Minutes A Day, Avoid Saturated And Trans Fat And Fried Foods, As Well As Snacky-Type Foods.
ehrid357	Hospital2	patient357	doctor2	Stomach Cancer	5-FU (fluorouracil) and leucovorin (folinic acid)	2019-09-07 12:53:30	Upper endoscopy	rid357	Stomach Cancer	chemotherapy	Choose Low-Fat Diary Products, Protien-Rich Foods.
ehrid1511	Hospital2	patient1511	doctor2	Diarrhea	Loperamide, Bismuth	2019-03-03 22:01:06	Blood test,stool test,Clostridium difficile toxin test	rid1511	infections, travelers' diarrhea	subsalicylate	Avoid Dairy Products, Spicy Foods And All Citrus Foods And Alcohol.
ehrid862	Hospital1	patient862	doctor1	Common Cold	acetaminophen (Tylenol)	2020-07-30 10:42:22	No lab tests exist	rid862	Common Cold	acetaminophen	Wash Your Hands Often, Avoid Touching Your Face, Don't Smoke And Maintain A Healthy Life Style.
ehrid948	Hospital1	patient948	doctor1	Cirrhosis	ursodiol	2022-11-29 11:53:42	liver biopsy	rid948	Cirrhosis	ursodiol	Eat Foods Like Lean Protein Poultry Or Fish, Strictly Avoid Alcohol.
ehrid1641	Hospital2	patient1641	doctor2	Diarrhea	Loperamide, Bismuth	2022-05-24 23:24:10	Blood test,stool test,Clostridium difficile toxin test	rid1641	infections, travelers' diarrhea	subsalicylate	Avoid Dairy Products, Spicy Foods And All Citrus Foods And Alcohol.
ehrid3	Hospital2	patient3	doctor2	Stroke	Aspirin 75mg,tPA	2020-10-30 02:11:43	CT ,MRI,Echocardiogram	rid3	Stroke	clopidogrel,dipyridamole	Avoid Sugar, Salt, Highly Processed Foods, Saturated And Trans Fats And Fried Foods.
ehrid1029	Hospital2	patient1029	doctor2	Stomach Cancer	5-FU (fluorouracil) and leucovorin (folinic acid)	2022-10-22 06:37:03	Upper endoscopy	rid1029	Stomach Cancer	chemotherapy	Choose Low-Fat Diary Products, Protien-Rich Foods.
ehrid223	Hospital2	patient223	doctor2	Common Cold	acetaminophen (Tylenol)	2021-06-03 04:30:51	No lab tests exist	rid223	Common Cold	acetaminophen	Wash Your Hands Often, Avoid Touching Your Face, Don't Smoke And Maintain A Healthy Life Style.
ehrid792	Hospital1	patient792	doctor1	HIV/AIDS	antiretroviral therapy (ART)	2022-04-17 01:10:45	Antigen/antibody tests	rid792	HIV/AIDS	antiretroviral therapy	Do Not Shoot Drugs, Avoid Sex And Do Not Breastfeed And Follow Balanced Diet.
ehrid368	Hospital1	patient368	doctor1	Common Cold	acetaminophen (Tylenol)	2021-10-11 09:49:09	No lab tests exist	rid368	Common Cold	acetaminophen	Wash Your Hands Often, Avoid Touching Your Face, Don't Smoke And Maintain A Healthy Life Style.
ehrid1242	Hospital1	patient1242	doctor1	Common Cold	acetaminophen (Tylenol)	2020-12-22 10:40:01	No lab tests exist	rid1242	Common Cold	acetaminophen	Wash Your Hands Often, Avoid Touching Your Face, Don't Smoke And Maintain A Healthy Life Style.
ehrid1122	Hospital1	patient1122	doctor1	Heart Disease	Aspirin 75mg,Pain Relieavers	2019-02-05 17:05:35	ECG,Blood Test,CT,MRI	rid1122	Heart Disease	thrombolytics	Regular Physical Activity - Success 30 Minutes A Day, Avoid Saturated And Trans Fat And Fried Foods, As Well As Snacky-Type Foods.
ehrid1979	Hospital2	patient1979	doctor2	Diarrhea	Loperamide, Bismuth	2021-04-17 03:06:23	Blood test,stool test,Clostridium difficile toxin test	rid1979	infections, travelers' diarrhea	subsalicylate	Avoid Dairy Products, Spicy Foods And All Citrus Foods And Alcohol.
ehrid1893	Hospital2	patient1893	doctor2	Diarrhea	Loperamide, Bismuth	2020-11-25 00:37:59	Blood test,stool test,Clostridium difficile toxin test	rid1893	infections, travelers' diarrhea	subsalicylate	Avoid Dairy Products, Spicy Foods And All Citrus Foods And Alcohol.
ehrid13	Hospital2	patient13	doctor2	Lung Cancer	Afinitor Disperz	2022-09-27 14:20:38	PET-CT scan,Chest X-ray	rid13	Lung Cancer	Everolimus	Avoid Smoking Or passive Smoking.
ehrid1062	Hospital1	patient1062	doctor1	HIV/AIDS	antiretroviral therapy (ART)	2019-11-20 12:08:50	Antigen/antibody tests	rid1062	HIV/AIDS	antiretroviral therapy	Do Not Shoot Drugs, Avoid Sex And Do Not Breastfeed And Follow Balanced Diet.
ehrid1223	Hospital2	patient1223	doctor2	Diarrhea	Loperamide, Bismuth	2019-05-30 11:14:43	Blood test,stool test,Clostridium difficile toxin test	rid1223	infections, travelers' diarrhea	subsalicylate	Avoid Dairy Products, Spicy Foods And All Citrus Foods And Alcohol.
ehrid412	Hospital1	patient412	doctor1	Common Cold	acetaminophen (Tylenol)	2019-02-18 21:34:28	No lab tests exist	rid412	Common Cold	acetaminophen	Wash Your Hands Often, Avoid Touching Your Face, Don't Smoke And Maintain A Healthy Life Style.
ehrid1126	Hospital1	patient1126	doctor1	Diarrhea	Loperamide, Bismuth	2022-05-15 09:41:27	Blood test,stool test,Clostridium difficile toxin test	rid1126	infections, travelers' diarrhea	subsalicylate	Avoid Dairy Products, Spicy Foods And All Citrus Foods And Alcohol.
ehrid1096	Hospital1	patient1096	doctor1	Diarrhea	Loperamide, Bismuth	2021-11-01 00:30:29	Blood test,stool test,Clostridium difficile toxin test	rid1096	infections, travelers' diarrhea	subsalicylate	Avoid Dairy Products, Spicy Foods And All Citrus Foods And Alcohol.
ehrid1902	Hospital1	patient1902	doctor1	Diarrhea	Loperamide, Bismuth	2020-09-14 14:42:43	Blood test,stool test,Clostridium difficile toxin test	rid1902	infections, travelers' diarrhea	subsalicylate	Avoid Dairy Products, Spicy Foods And All Citrus Foods And Alcohol.
ehrid1479	Hospital2	patient1479	doctor2	Heart Disease	Aspirin 75mg,Pain Relieavers	2019-04-10 00:11:38	ECG,Blood Test,CT,MRI	rid1479	Heart Disease	thrombolytics	Regular Physical Activity - Success 30 Minutes A Day, Avoid Saturated And Trans Fat And Fried Foods, As Well As Snacky-Type Foods.
ehrid38	Hospital1	patient38	doctor1	Malaria	Chloroquine phosphate	2020-10-16 18:47:23	Malaria Rapid Diagnostic Test	rid38	Malaria	Artemether/Lumfantrine Treatment	Drink Plenty Of Water, Control Fats Intake, Consume Ripe Papaya, Sweet Lime, Grapes Which Are Rich in Vitamin C
ehrid1032	Hospital1	patient1032	doctor1	Cirrhosis	ursodiol	2019-09-22 10:06:46	liver biopsy	rid1032	Cirrhosis	ursodiol	Eat Foods Like Lean Protein Poultry Or Fish, Strictly Avoid Alcohol.
ehrid894	Hospital1	patient894	doctor1	Common Cold	acetaminophen (Tylenol)	2021-12-23 10:44:17	No lab tests exist	rid894	Common Cold	acetaminophen	Wash Your Hands Often, Avoid Touching Your Face, Don't Smoke And Maintain A Healthy Life Style.
ehrid717	Hospital2	patient717	doctor2	Common Cold	acetaminophen (Tylenol)	2019-05-29 08:10:15	No lab tests exist	rid717	Common Cold	acetaminophen	Wash Your Hands Often, Avoid Touching Your Face, Don't Smoke And Maintain A Healthy Life Style.
ehrid351	Hospital2	patient351	doctor2	Asthma	Combination inhalers	2021-07-05 01:01:47	FeNO test, spirometry	rid351	Asthma	Theophylline -2 Nos	Avoid Smoke of Any Type, Control Asthma Triggers.
ehrid1113	Hospital2	patient1113	doctor2	Stomach Cancer	5-FU (fluorouracil) and leucovorin (folinic acid)	2020-05-16 22:23:57	Upper endoscopy	rid1113	Stomach Cancer	chemotherapy	Choose Low-Fat Diary Products, Protien-Rich Foods.
ehrid1002	Hospital1	patient1002	doctor1	Diarrhea	Loperamide, Bismuth	2019-09-11 22:38:54	Blood test,stool test,Clostridium difficile toxin test	rid1002	infections, travelers' diarrhea	subsalicylate	Avoid Dairy Products, Spicy Foods And All Citrus Foods And Alcohol.
ehrid1101	Hospital2	patient1101	doctor2	Diarrhea	Loperamide, Bismuth	2019-08-31 02:12:13	Blood test,stool test,Clostridium difficile toxin test	rid1101	infections, travelers' diarrhea	subsalicylate	Avoid Dairy Products, Spicy Foods And All Citrus Foods And Alcohol.
ehrid1636	Hospital1	patient1636	doctor1	Diarrhea	Loperamide, Bismuth	2021-07-02 21:49:09	Blood test,stool test,Clostridium difficile toxin test	rid1636	infections, travelers' diarrhea	subsalicylate	Avoid Dairy Products, Spicy Foods And All Citrus Foods And Alcohol.
ehrid996	Hospital1	patient996	doctor1	Cirrhosis	ursodiol	2019-10-12 04:23:32	liver biopsy	rid996	Cirrhosis	ursodiol	Eat Foods Like Lean Protein Poultry Or Fish, Strictly Avoid Alcohol.
ehrid202	Hospital1	patient202	doctor1	Common Cold	acetaminophen (Tylenol)	2020-08-28 13:43:11	No lab tests exist	rid202	Common Cold	acetaminophen	Wash Your Hands Often, Avoid Touching Your Face, Don't Smoke And Maintain A Healthy Life Style.
ehrid532	Hospital1	patient532	doctor1	Malaria	Chloroquine phosphate	2019-04-26 01:59:57	Malaria Rapid Diagnostic Test	rid532	Malaria	Artemether/Lumfantrine Treatment	Drink Plenty Of Water, Control Fats Intake, Consume Ripe Papaya, Sweet Lime, Grapes Which Are Rich in Vitamin C
ehrid939	Hospital2	patient939	doctor2	Common Cold	acetaminophen (Tylenol)	2019-03-12 22:19:57	No lab tests exist	rid939	Common Cold	acetaminophen	Wash Your Hands Often, Avoid Touching Your Face, Don't Smoke And Maintain A Healthy Life Style.
ehrid2221	Hospital2	patient2221	doctor2	Heart Disease	Aspirin 75mg,Pain Relieavers	2019-12-01 06:20:06	ECG,Blood Test,CT,MRI	rid2141	Heart Disease and Hypertension	thrombolytics	Regular Physical Activity - Success 30 Minutes A Day, Avoid Saturated And Trans Fat And Fried Foods, As Well As Snacky-Type Foods.
ehrid1363	Hospital2	patient1363	doctor2	Diarrhea	Loperamide, Bismuth	2021-06-13 17:00:09	Blood test,stool test,Clostridium difficile toxin test	rid1363	infections, travelers' diarrhea	subsalicylate	Avoid Dairy Products, Spicy Foods And All Citrus Foods And Alcohol.
ehrid23	Hospital2	patient23	doctor2	Common Cold	acetaminophen (Tylenol)	2021-08-30 08:46:22	No lab tests exist	rid23	Common Cold and Fever	acetaminophen	Wash Your Hands Often, Avoid Touching Your Face, Don't Smoke And Maintain A Healthy Life Style.
ehrid205	Hospital2	patient205	doctor2	Common Cold	acetaminophen (Tylenol)	2020-07-30 15:53:31	No lab tests exist	rid205	Common Cold	acetaminophen	Wash Your Hands Often, Avoid Touching Your Face, Don't Smoke And Maintain A Healthy Life Style.
ehrid1793	Hospital2	patient1793	doctor2	Diabetes	Metformin 250mg -2 Nos	2020-09-03 06:53:39	HbA1C,Fasting Blood Sugar Test	rid1793	Diabetes	Metformin 750mg -2 Nos	Regular Physical Activity - Success 30 Minutes A Day, Avoid Sugar, Ready To Eat Foods.
ehrid1757	Hospital2	patient1757	doctor2	Diarrhea	Loperamide, Bismuth	2021-08-16 15:19:52	Blood test,stool test,Clostridium difficile toxin test	rid1757	infections, travelers' diarrhea	subsalicylate	Avoid Dairy Products, Spicy Foods And All Citrus Foods And Alcohol.
ehrid1750	Hospital1	patient1750	doctor1	Fever	paracetamol 500mg	2021-02-06 02:43:30	Blood Test and Urine Test	rid1750	Fever	Acetaminophen injection	Avoid Caffeine And Alcohol, Stay Hydrated, Have Ample Amount Of Rest.
ehrid787	Hospital2	patient787	doctor2	Common Cold	acetaminophen (Tylenol)	2019-07-06 22:55:55	No lab tests exist	rid787	Common Cold	acetaminophen	Wash Your Hands Often, Avoid Touching Your Face, Don't Smoke And Maintain A Healthy Life Style.
ehrid1709	Hospital2	patient1709	doctor2	Diarrhea	Loperamide, Bismuth	2019-02-02 04:42:45	Blood test,stool test,Clostridium difficile toxin test	rid1709	infections, travelers' diarrhea	subsalicylate	Avoid Dairy Products, Spicy Foods And All Citrus Foods And Alcohol.
ehrid1437	Hospital2	patient1437	doctor2	Diarrhea	Loperamide, Bismuth	2022-05-01 01:19:49	Blood test,stool test,Clostridium difficile toxin test	rid1437	infections, travelers' diarrhea	subsalicylate	Avoid Dairy Products, Spicy Foods And All Citrus Foods And Alcohol.
ehrid2090	Hospital1	patient2090	doctor1	Diarrhea	Loperamide, Bismuth	2019-02-22 23:57:43	Blood test,stool test,Clostridium difficile toxin test	rid2090	infections, travelers' diarrhea	subsalicylate	Avoid Dairy Products, Spicy Foods And All Citrus Foods And Alcohol.
ehrid860	Hospital1	patient860	doctor1	Diarrhea	Loperamide, Bismuth	2021-01-24 09:12:59	Blood test,stool test,Clostridium difficile toxin test	rid860	infections, travelers' diarrhea	subsalicylate	Avoid Dairy Products, Spicy Foods And All Citrus Foods And Alcohol.
ehrid1789	Hospital2	patient1789	doctor2	Diarrhea	Loperamide, Bismuth	2022-02-28 11:56:36	Blood test,stool test,Clostridium difficile toxin test	rid1789	infections, travelers' diarrhea	subsalicylate	Avoid Dairy Products, Spicy Foods And All Citrus Foods And Alcohol.
ehrid136	Hospital1	patient136	doctor1	Heart Disease	Aspirin 75mg,Pain Relieavers	2021-06-25 09:11:22	ECG,Blood Test,CT,MRI	rid136	Heart Disease	thrombolytics	Regular Physical Activity - Success 30 Minutes A Day, Avoid Saturated And Trans Fat And Fried Foods, As Well As Snacky-Type Foods.
ehrid1166	Hospital1	patient1166	doctor1	Diabetes	Metformin 250mg -2 Nos	2019-01-21 12:18:28	HbA1C,Fasting Blood Sugar Test	rid1166	Diabetes	Metformin 750mg -2 Nos	Regular Physical Activity - Success 30 Minutes A Day, Avoid Sugar, Ready To Eat Foods.
ehrid563	Hospital2	patient563	doctor2	Common Cold	acetaminophen (Tylenol)	2021-06-11 20:04:38	No lab tests exist	rid563	Common Cold	acetaminophen	Wash Your Hands Often, Avoid Touching Your Face, Don't Smoke And Maintain A Healthy Life Style.
ehrid2228	Hospital2	patient2228	doctor1	Heart Disease	Aspirin 75mg,Pain Relieavers	2022-05-03 14:19:57	ECG,Blood Test,CT,MRI	rid2251	Heart Disease and Hypertension	thrombolytics	Regular Physical Activity - Success 30 Minutes A Day, Avoid Saturated And Trans Fat And Fried Foods, As Well As Snacky-Type Foods.
ehrid318	Hospital1	patient318	doctor1	Common Cold	acetaminophen (Tylenol)	2020-08-11 11:01:59	No lab tests exist	rid318	Common Cold	acetaminophen	Wash Your Hands Often, Avoid Touching Your Face, Don't Smoke And Maintain A Healthy Life Style.
ehrid384	Hospital1	patient384	doctor1	Cirrhosis	ursodiol	2021-07-10 10:30:13	liver biopsy	rid384	Cirrhosis	ursodiol	Eat Foods Like Lean Protein Poultry Or Fish, Strictly Avoid Alcohol.
ehrid1494	Hospital1	patient1494	doctor1	HIV/AIDS	antiretroviral therapy (ART)	2020-06-18 19:00:17	Antigen/antibody tests	rid1494	HIV/AIDS	antiretroviral therapy	Do Not Shoot Drugs, Avoid Sex And Do Not Breastfeed And Follow Balanced Diet.
ehrid2236	Hospital2	patient2236	doctor1	Heart Disease	Aspirin 75mg,Pain Relieavers	2021-07-09 06:36:25	ECG,Blood Test,CT,MRI	rid2163	Heart Disease and Hypertension	thrombolytics	Regular Physical Activity - Success 30 Minutes A Day, Avoid Saturated And Trans Fat And Fried Foods, As Well As Snacky-Type Foods.
ehrid850	Hospital1	patient850	doctor1	Fever	paracetamol 500mg	2021-11-22 18:56:32	Blood Test and Urine Test	rid850	Fever	Acetaminophen injection	Avoid Caffeine And Alcohol, Stay Hydrated, Have Ample Amount Of Rest.
ehrid166	Hospital1	patient166	doctor1	Common Cold	acetaminophen (Tylenol)	2020-10-20 15:40:23	No lab tests exist	rid166	Common Cold	acetaminophen	Wash Your Hands Often, Avoid Touching Your Face, Don't Smoke And Maintain A Healthy Life Style.
ehrid1500	Hospital1	patient1500	doctor1	Fever	paracetamol 500mg	2020-07-08 10:58:56	Blood Test and Urine Test	rid1500	Fever	Acetaminophen injection	Avoid Caffeine And Alcohol, Stay Hydrated, Have Ample Amount Of Rest.
ehrid1965	Hospital2	patient1965	doctor2	Alzheimer	Galantamine, rivastigmine	2022-06-08 09:51:19	MRI,CT	rid1965	Alzheimer	donepezil	Follow Mind Diet, Should Have <4 Servings A Week Of Red Meat, Less Than A Tablespoon Of Butter A Day.
ehrid2107	Hospital1	patient2107	doctor2	Heart Disease	Aspirin 75mg,Pain Relieavers	2020-06-11 14:04:49	ECG,Blood Test,CT,MRI	rid2181	Heart Disease and Hypertension	thrombolytics	Regular Physical Activity - Success 30 Minutes A Day, Avoid Saturated And Trans Fat And Fried Foods, As Well As Snacky-Type Foods.
ehrid1945	Hospital2	patient1945	doctor2	Diarrhea	Loperamide, Bismuth	2020-11-14 21:36:58	Blood test,stool test,Clostridium difficile toxin test	rid1945	infections, travelers' diarrhea	subsalicylate	Avoid Dairy Products, Spicy Foods And All Citrus Foods And Alcohol.
ehrid559	Hospital2	patient559	doctor2	Lung Cancer	Afinitor Disperz	2021-05-19 06:52:39	PET-CT scan,Chest X-ray	rid559	Lung Cancer	Everolimus	Avoid Smoking Or passive Smoking.
ehrid1640	Hospital1	patient1640	doctor1	Diarrhea	Loperamide, Bismuth	2022-05-16 20:32:26	Blood test,stool test,Clostridium difficile toxin test	rid1640	infections, travelers' diarrhea	subsalicylate	Avoid Dairy Products, Spicy Foods And All Citrus Foods And Alcohol.
ehrid1190	Hospital1	patient1190	doctor1	Diarrhea	Loperamide, Bismuth	2021-04-15 06:37:56	Blood test,stool test,Clostridium difficile toxin test	rid1190	infections, travelers' diarrhea	subsalicylate	Avoid Dairy Products, Spicy Foods And All Citrus Foods And Alcohol.
ehrid2006	Hospital1	patient2006	doctor1	Heart Disease	Aspirin 75mg,Pain Relieavers	2022-11-08 08:17:40	ECG,Blood Test,CT,MRI	rid2006	Heart Disease	thrombolytics	Regular Physical Activity - Success 30 Minutes A Day, Avoid Saturated And Trans Fat And Fried Foods, As Well As Snacky-Type Foods.
ehrid2226	Hospital2	patient2226	doctor1	Heart Disease	Aspirin 75mg,Pain Relieavers	2019-06-01 22:20:20	ECG,Blood Test,CT,MRI	rid2180	Heart Disease and Hypertension	thrombolytics	Regular Physical Activity - Success 30 Minutes A Day, Avoid Saturated And Trans Fat And Fried Foods, As Well As Snacky-Type Foods.
ehrid269	Hospital2	patient269	doctor2	Common Cold	acetaminophen (Tylenol)	2020-12-24 15:39:54	No lab tests exist	rid269	Common Cold	acetaminophen	Wash Your Hands Often, Avoid Touching Your Face, Don't Smoke And Maintain A Healthy Life Style.
ehrid1418	Hospital1	patient1418	doctor1	Diarrhea	Loperamide, Bismuth	2022-07-27 05:14:27	Blood test,stool test,Clostridium difficile toxin test	rid1418	infections, travelers' diarrhea	subsalicylate	Avoid Dairy Products, Spicy Foods And All Citrus Foods And Alcohol.
ehrid2230	Hospital2	patient2230	doctor1	Heart Disease	Aspirin 75mg,Pain Relieavers	2019-12-03 17:58:10	ECG,Blood Test,CT,MRI	rid2182	Heart Disease and Hypertension	thrombolytics	Regular Physical Activity - Success 30 Minutes A Day, Avoid Saturated And Trans Fat And Fried Foods, As Well As Snacky-Type Foods.
ehrid1151	Hospital2	patient1151	doctor2	Diarrhea	Loperamide, Bismuth	2022-11-18 13:38:37	Blood test,stool test,Clostridium difficile toxin test	rid1151	infections, travelers' diarrhea	subsalicylate	Avoid Dairy Products, Spicy Foods And All Citrus Foods And Alcohol.
ehrid2205	Hospital1	patient2205	doctor2	Heart Disease	Aspirin 75mg,Pain Relieavers	2019-11-06 11:05:57	ECG,Blood Test,CT,MRI	rid2129	Heart Disease and Hypertension	thrombolytics	Regular Physical Activity - Success 30 Minutes A Day, Avoid Saturated And Trans Fat And Fried Foods, As Well As Snacky-Type Foods.
ehrid1092	Hospital1	patient1092	doctor1	Stomach Cancer	5-FU (fluorouracil) and leucovorin (folinic acid)	2021-08-28 14:20:06	Upper endoscopy	rid1092	Stomach Cancer	chemotherapy	Choose Low-Fat Diary Products, Protien-Rich Foods.
ehrid839	Hospital2	patient839	doctor2	Common Cold	acetaminophen (Tylenol)	2021-07-13 09:23:29	No lab tests exist	rid839	Common Cold	acetaminophen	Wash Your Hands Often, Avoid Touching Your Face, Don't Smoke And Maintain A Healthy Life Style.
ehrid1433	Hospital2	patient1433	doctor2	Diarrhea	Loperamide, Bismuth	2020-11-01 23:16:54	Blood test,stool test,Clostridium difficile toxin test	rid1433	infections, travelers' diarrhea	subsalicylate	Avoid Dairy Products, Spicy Foods And All Citrus Foods And Alcohol.
ehrid1204	Hospital1	patient1204	doctor1	Stroke	Aspirin 75mg,tPA	2019-04-24 06:15:43	CT ,MRI,Echocardiogram	rid1204	Stroke	clopidogrel,dipyridamole	Avoid Sugar, Salt, Highly Processed Foods, Saturated And Trans Fats And Fried Foods.
ehrid198	Hospital1	patient198	doctor1	HIV/AIDS	antiretroviral therapy (ART)	2019-03-03 20:52:59	Antigen/antibody tests	rid198	HIV/AIDS	antiretroviral therapy	Do Not Shoot Drugs, Avoid Sex And Do Not Breastfeed And Follow Balanced Diet.
ehrid1664	Hospital1	patient1664	doctor1	Tuberculosis	Rifater >600mg	2019-05-19 14:13:29	Rapid Sputum Test,T-Spot	rid1664	Tuberculosis	Isoniazid INH pills for 6/9 months	Skip Tobacco In All Forms , Don't Consume Alchohol And Limit Caffeinated Drinks.
ehrid1339	Hospital2	patient1339	doctor2	Lung Cancer	Afinitor Disperz	2019-03-11 19:10:23	PET-CT scan,Chest X-ray	rid1339	Lung Cancer	Everolimus	Avoid Smoking Or passive Smoking.
ehrid1025	Hospital2	patient1025	doctor2	Fever	paracetamol 500mg	2022-11-26 12:13:10	Blood Test and Urine Test	rid1025	Fever	Acetaminophen injection	Avoid Caffeine And Alcohol, Stay Hydrated, Have Ample Amount Of Rest.
ehrid1117	Hospital2	patient1117	doctor2	Diarrhea	Loperamide, Bismuth	2019-01-25 12:29:51	Blood test,stool test,Clostridium difficile toxin test	rid1117	infections, travelers' diarrhea	subsalicylate	Avoid Dairy Products, Spicy Foods And All Citrus Foods And Alcohol.
ehrid155	Hospital2	patient155	doctor2	Common Cold	acetaminophen (Tylenol)	2019-04-26 04:02:47	No lab tests exist	rid155	Common Cold	acetaminophen	Wash Your Hands Often, Avoid Touching Your Face, Don't Smoke And Maintain A Healthy Life Style.
ehrid1825	Hospital2	patient1825	doctor2	Fever	paracetamol 500mg	2022-04-13 16:00:10	Blood Test and Urine Test	rid1825	Fever	Acetaminophen injection	Avoid Caffeine And Alcohol, Stay Hydrated, Have Ample Amount Of Rest.
ehrid689	Hospital2	patient689	doctor2	Lung Cancer	Afinitor Disperz	2019-06-08 04:44:53	PET-CT scan,Chest X-ray	rid689	Lung Cancer	Everolimus	Avoid Smoking Or passive Smoking.
ehrid235	Hospital2	patient235	doctor2	Common Cold	acetaminophen (Tylenol)	2022-02-22 04:22:53	No lab tests exist	rid235	Common Cold	acetaminophen	Wash Your Hands Often, Avoid Touching Your Face, Don't Smoke And Maintain A Healthy Life Style.
ehrid1349	Hospital2	patient1349	doctor2	Malaria	Chloroquine phosphate	2022-03-26 03:54:00	Malaria Rapid Diagnostic Test	rid1349	Malaria	Artemether/Lumfantrine Treatment	Drink Plenty Of Water, Control Fats Intake, Consume Ripe Papaya, Sweet Lime, Grapes Which Are Rich in Vitamin C
ehrid1687	Hospital2	patient1687	doctor2	Diarrhea	Loperamide, Bismuth	2021-08-22 14:59:29	Blood test,stool test,Clostridium difficile toxin test	rid1687	infections, travelers' diarrhea	subsalicylate	Avoid Dairy Products, Spicy Foods And All Citrus Foods And Alcohol.
ehrid1361	Hospital2	patient1361	doctor2	Diarrhea	Loperamide, Bismuth	2020-04-28 16:21:20	Blood test,stool test,Clostridium difficile toxin test	rid1361	infections, travelers' diarrhea	subsalicylate	Avoid Dairy Products, Spicy Foods And All Citrus Foods And Alcohol.
ehrid1564	Hospital1	patient1564	doctor1	Common Cold	acetaminophen (Tylenol)	2022-02-26 19:44:21	No lab tests exist	rid1564	Common Cold	acetaminophen	Wash Your Hands Often, Avoid Touching Your Face, Don't Smoke And Maintain A Healthy Life Style.
ehrid1739	Hospital2	patient1739	doctor2	Diarrhea	Loperamide, Bismuth	2022-08-17 09:26:43	Blood test,stool test,Clostridium difficile toxin test	rid1739	infections, travelers' diarrhea	subsalicylate	Avoid Dairy Products, Spicy Foods And All Citrus Foods And Alcohol.
ehrid2152	Hospital1	patient2152	doctor1	Heart Disease	Aspirin 75mg,Pain Relieavers	2021-03-28 21:55:45	ECG,Blood Test,CT,MRI	rid2185	Heart Disease and Hypertension	thrombolytics	Regular Physical Activity - Success 30 Minutes A Day, Avoid Saturated And Trans Fat And Fried Foods, As Well As Snacky-Type Foods.
ehrid604	Hospital1	patient604	doctor1	Common Cold	acetaminophen (Tylenol)	2022-11-13 05:22:47	No lab tests exist	rid604	Common Cold	acetaminophen	Wash Your Hands Often, Avoid Touching Your Face, Don't Smoke And Maintain A Healthy Life Style.
ehrid188	Hospital1	patient188	doctor1	Common Cold	acetaminophen (Tylenol)	2020-09-24 04:12:28	No lab tests exist	rid188	Common Cold	acetaminophen	Wash Your Hands Often, Avoid Touching Your Face, Don't Smoke And Maintain A Healthy Life Style.
ehrid382	Hospital1	patient382	doctor1	Common Cold	acetaminophen (Tylenol)	2019-09-12 08:05:01	No lab tests exist	rid382	Common Cold	acetaminophen	Wash Your Hands Often, Avoid Touching Your Face, Don't Smoke And Maintain A Healthy Life Style.
ehrid1196	Hospital1	patient1196	doctor1	Common Cold	acetaminophen (Tylenol)	2021-01-31 12:56:35	No lab tests exist	rid1196	Common Cold	acetaminophen	Wash Your Hands Often, Avoid Touching Your Face, Don't Smoke And Maintain A Healthy Life Style.
ehrid2252	Hospital1	patient2252	doctor1	Heart Disease	Aspirin 75mg,Pain Relieavers	2022-02-22 04:17:02	ECG,Blood Test,CT,MRI	rid2171	Heart Disease and Hypertension	thrombolytics	Regular Physical Activity - Success 30 Minutes A Day, Avoid Saturated And Trans Fat And Fried Foods, As Well As Snacky-Type Foods.
ehrid1332	Hospital1	patient1332	doctor1	HIV/AIDS	antiretroviral therapy (ART)	2022-05-01 11:05:40	Antigen/antibody tests	rid1332	HIV/AIDS	antiretroviral therapy	Do Not Shoot Drugs, Avoid Sex And Do Not Breastfeed And Follow Balanced Diet.
ehrid2170	Hospital2	patient2170	doctor1	Heart Disease	Aspirin 75mg,Pain Relieavers	2022-07-11 02:46:03	ECG,Blood Test,CT,MRI	rid2243	Heart Disease and Hypertension	thrombolytics	Regular Physical Activity - Success 30 Minutes A Day, Avoid Saturated And Trans Fat And Fried Foods, As Well As Snacky-Type Foods.
ehrid757	Hospital2	patient757	doctor2	Common Cold	acetaminophen (Tylenol)	2019-11-13 21:06:56	No lab tests exist	rid757	Common Cold	acetaminophen	Wash Your Hands Often, Avoid Touching Your Face, Don't Smoke And Maintain A Healthy Life Style.
ehrid1392	Hospital1	patient1392	doctor1	Cirrhosis	ursodiol	2020-02-12 10:33:17	liver biopsy	rid1392	Cirrhosis	ursodiol	Eat Foods Like Lean Protein Poultry Or Fish, Strictly Avoid Alcohol.
ehrid1712	Hospital1	patient1712	doctor1	Tuberculosis	Rifater >600mg	2021-02-26 01:31:30	Rapid Sputum Test,T-Spot	rid1712	Tuberculosis	Isoniazid INH pills for 6/9 months	Skip Tobacco In All Forms , Don't Consume Alchohol And Limit Caffeinated Drinks.
ehrid986	Hospital1	patient986	doctor1	Heart Disease	Aspirin 75mg,Pain Relieavers	2019-04-28 02:44:43	ECG,Blood Test,CT,MRI	rid986	Heart Disease	thrombolytics	Regular Physical Activity - Success 30 Minutes A Day, Avoid Saturated And Trans Fat And Fried Foods, As Well As Snacky-Type Foods.
ehrid379	Hospital2	patient379	doctor2	Common Cold	acetaminophen (Tylenol)	2020-09-11 07:54:32	No lab tests exist	rid379	Common Cold	acetaminophen	Wash Your Hands Often, Avoid Touching Your Face, Don't Smoke And Maintain A Healthy Life Style.
ehrid1719	Hospital2	patient1719	doctor2	Asthma	Combination inhalers	2020-08-29 12:29:39	FeNO test, spirometry	rid1719	Asthma	Theophylline -2 Nos	Avoid Smoke of Any Type, Control Asthma Triggers.
ehrid2145	Hospital1	patient2145	doctor2	Heart Disease	Aspirin 75mg,Pain Relieavers	2019-01-04 04:03:49	ECG,Blood Test,CT,MRI	rid2127	Heart Disease and Hypertension	thrombolytics	Regular Physical Activity - Success 30 Minutes A Day, Avoid Saturated And Trans Fat And Fried Foods, As Well As Snacky-Type Foods.
ehrid958	Hospital1	patient958	doctor1	Common Cold	acetaminophen (Tylenol)	2021-12-25 19:47:45	No lab tests exist	rid958	Common Cold	acetaminophen	Wash Your Hands Often, Avoid Touching Your Face, Don't Smoke And Maintain A Healthy Life Style.
ehrid868	Hospital1	patient868	doctor1	Stroke	Aspirin 75mg,tPA	2022-09-10 22:02:56	CT ,MRI,Echocardiogram	rid868	Stroke	clopidogrel,dipyridamole	Avoid Sugar, Salt, Highly Processed Foods, Saturated And Trans Fats And Fried Foods.
ehrid919	Hospital2	patient919	doctor2	Common Cold	acetaminophen (Tylenol)	2019-11-26 03:18:22	No lab tests exist	rid919	Common Cold	acetaminophen	Wash Your Hands Often, Avoid Touching Your Face, Don't Smoke And Maintain A Healthy Life Style.
ehrid555	Hospital2	patient555	doctor2	Alzheimer	Galantamine, rivastigmine	2020-03-24 17:42:50	MRI,CT	rid555	Alzheimer	donepezil	Follow Mind Diet, Should Have <4 Servings A Week Of Red Meat, Less Than A Tablespoon Of Butter A Day.
ehrid802	Hospital1	patient802	doctor1	Common Cold	acetaminophen (Tylenol)	2020-01-02 03:59:10	No lab tests exist	rid802	Common Cold	acetaminophen	Wash Your Hands Often, Avoid Touching Your Face, Don't Smoke And Maintain A Healthy Life Style.
ehrid706	Hospital1	patient706	doctor1	Common Cold	acetaminophen (Tylenol)	2021-07-31 18:49:38	No lab tests exist	rid706	Common Cold	acetaminophen	Wash Your Hands Often, Avoid Touching Your Face, Don't Smoke And Maintain A Healthy Life Style.
ehrid290	Hospital1	patient290	doctor1	Diarrhea	Loperamide, Bismuth	2019-05-15 11:24:57	Blood test,stool test,Clostridium difficile toxin test	rid290	infections, travelers' diarrhea	subsalicylate	Avoid Dairy Products, Spicy Foods And All Citrus Foods And Alcohol.
ehrid1714	Hospital1	patient1714	doctor1	Diarrhea	Loperamide, Bismuth	2021-05-25 19:11:38	Blood test,stool test,Clostridium difficile toxin test	rid1714	infections, travelers' diarrhea	subsalicylate	Avoid Dairy Products, Spicy Foods And All Citrus Foods And Alcohol.
ehrid2047	Hospital2	patient2047	doctor2	Common Cold	acetaminophen (Tylenol)	2020-07-15 12:54:05	No lab tests exist	rid2047	Common Cold	acetaminophen	Wash Your Hands Often, Avoid Touching Your Face, Don't Smoke And Maintain A Healthy Life Style.
ehrid225	Hospital2	patient225	doctor2	Fever	paracetamol 500mg	2020-09-20 15:16:53	Blood Test and Urine Test	rid225	Fever	Acetaminophen injection	Avoid Caffeine And Alcohol, Stay Hydrated, Have Ample Amount Of Rest.
ehrid549	Hospital2	patient549	doctor2	Asthma	Combination inhalers	2021-04-01 02:39:05	FeNO test, spirometry	rid549	Asthma	Theophylline -2 Nos	Avoid Smoke of Any Type, Control Asthma Triggers.
ehrid327	Hospital2	patient327	doctor2	Common Cold	acetaminophen (Tylenol)	2020-05-01 14:09:53	No lab tests exist	rid327	Common Cold	acetaminophen	Wash Your Hands Often, Avoid Touching Your Face, Don't Smoke And Maintain A Healthy Life Style.
ehrid877	Hospital2	patient877	doctor2	Common Cold	acetaminophen (Tylenol)	2022-01-19 04:21:25	No lab tests exist	rid877	Common Cold	acetaminophen	Wash Your Hands Often, Avoid Touching Your Face, Don't Smoke And Maintain A Healthy Life Style.
ehrid1174	Hospital1	patient1174	doctor1	Diarrhea	Loperamide, Bismuth	2021-09-17 09:07:21	Blood test,stool test,Clostridium difficile toxin test	rid1174	infections, travelers' diarrhea	subsalicylate	Avoid Dairy Products, Spicy Foods And All Citrus Foods And Alcohol.
ehrid2261	Hospital2	patient2261	doctor2	Heart Disease	Aspirin 75mg,Pain Relieavers	2020-12-28 12:19:56	ECG,Blood Test,CT,MRI	rid2148	Heart Disease and Hypertension	thrombolytics	Regular Physical Activity - Success 30 Minutes A Day, Avoid Saturated And Trans Fat And Fried Foods, As Well As Snacky-Type Foods.
ehrid1470	Hospital1	patient1470	doctor1	Stomach Cancer	5-FU (fluorouracil) and leucovorin (folinic acid)	2020-01-04 07:23:56	Upper endoscopy	rid1470	Stomach Cancer	chemotherapy	Choose Low-Fat Diary Products, Protien-Rich Foods.
ehrid1770	Hospital1	patient1770	doctor1	Diarrhea	Loperamide, Bismuth	2022-05-28 01:33:47	Blood test,stool test,Clostridium difficile toxin test	rid1770	infections, travelers' diarrhea	subsalicylate	Avoid Dairy Products, Spicy Foods And All Citrus Foods And Alcohol.
ehrid167	Hospital2	patient167	doctor2	Common Cold	acetaminophen (Tylenol)	2020-04-03 09:19:49	No lab tests exist	rid167	Common Cold	acetaminophen	Wash Your Hands Often, Avoid Touching Your Face, Don't Smoke And Maintain A Healthy Life Style.
ehrid2104	Hospital1	patient2104	doctor1	Heart Disease	Aspirin 75mg,Pain Relieavers	2020-05-01 17:56:40	ECG,Blood Test,CT,MRI	rid2136	Heart Disease and Hypertension	thrombolytics	Regular Physical Activity - Success 30 Minutes A Day, Avoid Saturated And Trans Fat And Fried Foods, As Well As Snacky-Type Foods.
ehrid581	Hospital2	patient581	doctor2	Common Cold	acetaminophen (Tylenol)	2020-02-01 23:10:08	No lab tests exist	rid581	Common Cold	acetaminophen	Wash Your Hands Often, Avoid Touching Your Face, Don't Smoke And Maintain A Healthy Life Style.
ehrid929	Hospital2	patient929	doctor2	Common Cold	acetaminophen (Tylenol)	2020-03-07 22:26:56	No lab tests exist	rid929	Common Cold	acetaminophen	Wash Your Hands Often, Avoid Touching Your Face, Don't Smoke And Maintain A Healthy Life Style.
ehrid981	Hospital2	patient981	doctor2	Asthma	Combination inhalers	2021-10-30 15:29:11	FeNO test, spirometry	rid981	Asthma	Theophylline -2 Nos	Avoid Smoke of Any Type, Control Asthma Triggers.
ehrid2038	Hospital1	patient2038	doctor1	Diarrhea	Loperamide, Bismuth	2021-02-17 17:29:38	Blood test,stool test,Clostridium difficile toxin test	rid2038	infections, travelers' diarrhea	subsalicylate	Avoid Dairy Products, Spicy Foods And All Citrus Foods And Alcohol.
ehrid2066	Hospital1	patient2066	doctor1	Diarrhea	Loperamide, Bismuth	2021-12-06 22:20:21	Blood test,stool test,Clostridium difficile toxin test	rid2066	infections, travelers' diarrhea	subsalicylate	Avoid Dairy Products, Spicy Foods And All Citrus Foods And Alcohol.
ehrid983	Hospital2	patient983	doctor2	Common Cold	acetaminophen (Tylenol)	2019-08-23 19:13:20	No lab tests exist	rid983	Common Cold	acetaminophen	Wash Your Hands Often, Avoid Touching Your Face, Don't Smoke And Maintain A Healthy Life Style.
ehrid389	Hospital2	patient389	doctor2	Common Cold	acetaminophen (Tylenol)	2020-05-06 14:53:19	No lab tests exist	rid389	Common Cold	acetaminophen	Wash Your Hands Often, Avoid Touching Your Face, Don't Smoke And Maintain A Healthy Life Style.
ehrid554	Hospital1	patient554	doctor1	Common Cold	acetaminophen (Tylenol)	2019-06-24 13:33:39	No lab tests exist	rid554	Common Cold	acetaminophen	Wash Your Hands Often, Avoid Touching Your Face, Don't Smoke And Maintain A Healthy Life Style.
ehrid675	Hospital2	patient675	doctor2	Fever	paracetamol 500mg	2021-06-16 15:36:37	Blood Test and Urine Test	rid675	Fever	Acetaminophen injection	Avoid Caffeine And Alcohol, Stay Hydrated, Have Ample Amount Of Rest.
ehrid470	Hospital1	patient470	doctor1	Diarrhea	Loperamide, Bismuth	2021-03-01 07:58:17	Blood test,stool test,Clostridium difficile toxin test	rid470	infections, travelers' diarrhea	subsalicylate	Avoid Dairy Products, Spicy Foods And All Citrus Foods And Alcohol.
ehrid800	Hospital1	patient800	doctor1	Fever	paracetamol 500mg	2019-10-31 23:51:20	Blood Test and Urine Test	rid800	Fever	Acetaminophen injection	Avoid Caffeine And Alcohol, Stay Hydrated, Have Ample Amount Of Rest.
ehrid66	Hospital1	patient66	doctor1	Diabetes	Metformin 250mg -2 Nos	2020-08-14 21:43:37	HbA1C,Fasting Blood Sugar Test	rid66	Diabetes and Chorestrol	Metformin 750mg -2 Nos	Regular Physical Activity - Success 30 Minutes A Day, Avoid Sugar, Ready To Eat Foods.
ehrid36	Hospital1	patient36	doctor1	HIV/AIDS	antiretroviral therapy (ART)	2019-06-06 16:43:17	Antigen/antibody tests	rid36	HIV/AIDS	antiretroviral therapy	Do Not Shoot Drugs, Avoid Sex And Do Not Breastfeed And Follow Balanced Diet.
ehrid804	Hospital1	patient804	doctor1	Cirrhosis	ursodiol	2021-10-17 06:28:36	liver biopsy	rid804	Cirrhosis	ursodiol	Eat Foods Like Lean Protein Poultry Or Fish, Strictly Avoid Alcohol.
ehrid1222	Hospital1	patient1222	doctor1	Lung Cancer	Afinitor Disperz	2021-05-03 22:54:07	PET-CT scan,Chest X-ray	rid1222	Lung Cancer	Everolimus	Avoid Smoking Or passive Smoking.
ehrid1237	Hospital2	patient1237	doctor2	Diarrhea	Loperamide, Bismuth	2022-05-18 20:16:11	Blood test,stool test,Clostridium difficile toxin test	rid1237	infections, travelers' diarrhea	subsalicylate	Avoid Dairy Products, Spicy Foods And All Citrus Foods And Alcohol.
ehrid98	Hospital1	patient98	doctor1	Stroke	Aspirin 75mg,tPA	2022-05-06 16:44:36	CT ,MRI,Echocardiogram	rid98	Stroke	clopidogrel,dipyridamole	Avoid Sugar, Salt, Highly Processed Foods, Saturated And Trans Fats And Fried Foods.
ehrid1690	Hospital1	patient1690	doctor1	Diarrhea	Loperamide, Bismuth	2020-09-07 16:03:59	Blood test,stool test,Clostridium difficile toxin test	rid1690	infections, travelers' diarrhea	subsalicylate	Avoid Dairy Products, Spicy Foods And All Citrus Foods And Alcohol.
ehrid1991	Hospital2	patient1991	doctor2	Diabetes	Metformin 250mg -2 Nos	2022-12-25 04:50:26	HbA1C,Fasting Blood Sugar Test	rid1991	Diabetes	Metformin 750mg -2 Nos	Regular Physical Activity - Success 30 Minutes A Day, Avoid Sugar, Ready To Eat Foods.
ehrid293	Hospital2	patient293	doctor2	Common Cold	acetaminophen (Tylenol)	2020-02-28 11:44:38	No lab tests exist	rid293	Common Cold	acetaminophen	Wash Your Hands Often, Avoid Touching Your Face, Don't Smoke And Maintain A Healthy Life Style.
ehrid128	Hospital1	patient128	doctor1	Tuberculosis	Rifater >600mg	2020-04-26 04:27:18	Rapid Sputum Test,T-Spot	rid128	Tuberculosis	Isoniazid INH pills for 6/9 months	Skip Tobacco In All Forms , Don't Consume Alchohol And Limit Caffeinated Drinks.
ehrid1618	Hospital1	patient1618	doctor1	Diarrhea	Loperamide, Bismuth	2021-02-08 22:42:48	Blood test,stool test,Clostridium difficile toxin test	rid1618	infections, travelers' diarrhea	subsalicylate	Avoid Dairy Products, Spicy Foods And All Citrus Foods And Alcohol.
ehrid2223	Hospital2	patient2223	doctor2	Heart Disease	Aspirin 75mg,Pain Relieavers	2021-11-26 21:47:54	ECG,Blood Test,CT,MRI	rid2179	Heart Disease and Hypertension	thrombolytics	Regular Physical Activity - Success 30 Minutes A Day, Avoid Saturated And Trans Fat And Fried Foods, As Well As Snacky-Type Foods.
ehrid1476	Hospital1	patient1476	doctor1	HIV/AIDS	antiretroviral therapy (ART)	2022-04-08 07:58:46	Antigen/antibody tests	rid1476	HIV/AIDS	antiretroviral therapy	Do Not Shoot Drugs, Avoid Sex And Do Not Breastfeed And Follow Balanced Diet.
ehrid1702	Hospital1	patient1702	doctor1	Common Cold	acetaminophen (Tylenol)	2020-07-05 05:50:23	No lab tests exist	rid1702	Common Cold	acetaminophen	Wash Your Hands Often, Avoid Touching Your Face, Don't Smoke And Maintain A Healthy Life Style.
ehrid251	Hospital2	patient251	doctor2	Common Cold	acetaminophen (Tylenol)	2020-01-06 22:08:14	No lab tests exist	rid251	Common Cold	acetaminophen	Wash Your Hands Often, Avoid Touching Your Face, Don't Smoke And Maintain A Healthy Life Style.
ehrid771	Hospital2	patient771	doctor2	Common Cold	acetaminophen (Tylenol)	2021-07-29 19:47:25	No lab tests exist	rid771	Common Cold	acetaminophen	Wash Your Hands Often, Avoid Touching Your Face, Don't Smoke And Maintain A Healthy Life Style.
ehrid595	Hospital2	patient595	doctor2	Heart Disease	Aspirin 75mg,Pain Relieavers	2022-03-03 17:41:00	ECG,Blood Test,CT,MRI	rid595	Heart Disease	thrombolytics	Regular Physical Activity - Success 30 Minutes A Day, Avoid Saturated And Trans Fat And Fried Foods, As Well As Snacky-Type Foods.
ehrid2114	Hospital2	patient2114	doctor1	Heart Disease	Aspirin 75mg,Pain Relieavers	2021-07-07 07:59:59	ECG,Blood Test,CT,MRI	rid2232	Heart Disease and Hypertension	thrombolytics	Regular Physical Activity - Success 30 Minutes A Day, Avoid Saturated And Trans Fat And Fried Foods, As Well As Snacky-Type Foods.
ehrid2074	Hospital1	patient2074	doctor1	Heart Disease	Aspirin 75mg,Pain Relieavers	2019-03-21 22:44:38	ECG,Blood Test,CT,MRI	rid2074	Heart Disease	thrombolytics	Regular Physical Activity - Success 30 Minutes A Day, Avoid Saturated And Trans Fat And Fried Foods, As Well As Snacky-Type Foods.
ehrid1142	Hospital1	patient1142	doctor1	Diarrhea	Loperamide, Bismuth	2021-12-30 11:33:37	Blood test,stool test,Clostridium difficile toxin test	rid1142	infections, travelers' diarrhea	subsalicylate	Avoid Dairy Products, Spicy Foods And All Citrus Foods And Alcohol.
ehrid949	Hospital2	patient949	doctor2	Lung Cancer	Afinitor Disperz	2020-05-29 00:23:04	PET-CT scan,Chest X-ray	rid949	Lung Cancer	Everolimus	Avoid Smoking Or passive Smoking.
ehrid1310	Hospital1	patient1310	doctor1	Diarrhea	Loperamide, Bismuth	2021-12-16 10:05:43	Blood test,stool test,Clostridium difficile toxin test	rid1310	infections, travelers' diarrhea	subsalicylate	Avoid Dairy Products, Spicy Foods And All Citrus Foods And Alcohol.
ehrid117	Hospital2	patient117	doctor2	Asthma	Combination inhalers	2019-06-12 05:39:23	FeNO test, spirometry	rid117	Asthma	Theophylline -2 Nos	Avoid Smoke of Any Type, Control Asthma Triggers.
ehrid912	Hospital1	patient912	doctor1	Cirrhosis	ursodiol	2019-01-02 01:53:56	liver biopsy	rid912	Cirrhosis	ursodiol	Eat Foods Like Lean Protein Poultry Or Fish, Strictly Avoid Alcohol.
ehrid1107	Hospital2	patient1107	doctor2	Asthma	Combination inhalers	2019-10-18 18:15:08	FeNO test, spirometry	rid1107	Asthma	Theophylline -2 Nos	Avoid Smoke of Any Type, Control Asthma Triggers.
ehrid1723	Hospital2	patient1723	doctor2	Diarrhea	Loperamide, Bismuth	2022-09-01 19:55:54	Blood test,stool test,Clostridium difficile toxin test	rid1723	infections, travelers' diarrhea	subsalicylate	Avoid Dairy Products, Spicy Foods And All Citrus Foods And Alcohol.
ehrid1091	Hospital2	patient1091	doctor2	Diarrhea	Loperamide, Bismuth	2020-04-04 17:35:07	Blood test,stool test,Clostridium difficile toxin test	rid1091	infections, travelers' diarrhea	subsalicylate	Avoid Dairy Products, Spicy Foods And All Citrus Foods And Alcohol.
ehrid2240	Hospital1	patient2240	doctor1	Heart Disease	Aspirin 75mg,Pain Relieavers	2022-10-25 21:30:23	ECG,Blood Test,CT,MRI	rid2250	Heart Disease and Hypertension	thrombolytics	Regular Physical Activity - Success 30 Minutes A Day, Avoid Saturated And Trans Fat And Fried Foods, As Well As Snacky-Type Foods.
ehrid1498	Hospital1	patient1498	doctor1	Stroke	Aspirin 75mg,tPA	2019-11-06 17:14:59	CT ,MRI,Echocardiogram	rid1498	Stroke	clopidogrel,dipyridamole	Avoid Sugar, Salt, Highly Processed Foods, Saturated And Trans Fats And Fried Foods.
ehrid1357	Hospital2	patient1357	doctor2	Common Cold	acetaminophen (Tylenol)	2019-08-13 22:47:05	No lab tests exist	rid1357	Common Cold	acetaminophen	Wash Your Hands Often, Avoid Touching Your Face, Don't Smoke And Maintain A Healthy Life Style.
ehrid567	Hospital2	patient567	doctor2	Stomach Cancer	5-FU (fluorouracil) and leucovorin (folinic acid)	2019-08-17 19:16:08	Upper endoscopy	rid567	Stomach Cancer	chemotherapy	Choose Low-Fat Diary Products, Protien-Rich Foods.
ehrid1246	Hospital1	patient1246	doctor1	Stroke	Aspirin 75mg,tPA	2019-08-31 18:59:19	CT ,MRI,Echocardiogram	rid1246	Stroke	clopidogrel,dipyridamole	Avoid Sugar, Salt, Highly Processed Foods, Saturated And Trans Fats And Fried Foods.
ehrid1949	Hospital2	patient1949	doctor2	Diarrhea	Loperamide, Bismuth	2019-02-08 18:53:43	Blood test,stool test,Clostridium difficile toxin test	rid1949	infections, travelers' diarrhea	subsalicylate	Avoid Dairy Products, Spicy Foods And All Citrus Foods And Alcohol.
ehrid2082	Hospital1	patient2082	doctor1	Diarrhea	Loperamide, Bismuth	2022-09-11 19:21:51	Blood test,stool test,Clostridium difficile toxin test	rid2082	infections, travelers' diarrhea	subsalicylate	Avoid Dairy Products, Spicy Foods And All Citrus Foods And Alcohol.
ehrid169	Hospital2	patient169	doctor2	Lung Cancer	Afinitor Disperz	2019-04-24 16:49:58	PET-CT scan,Chest X-ray	rid169	Lung Cancer	Everolimus	Avoid Smoking Or passive Smoking.
ehrid2202	Hospital2	patient2202	doctor1	Heart Disease	Aspirin 75mg,Pain Relieavers	2019-01-08 09:05:07	ECG,Blood Test,CT,MRI	rid2123	Heart Disease and Hypertension	thrombolytics	Regular Physical Activity - Success 30 Minutes A Day, Avoid Saturated And Trans Fat And Fried Foods, As Well As Snacky-Type Foods.
ehrid1759	Hospital2	patient1759	doctor2	Diarrhea	Loperamide, Bismuth	2019-02-23 09:38:19	Blood test,stool test,Clostridium difficile toxin test	rid1759	infections, travelers' diarrhea	subsalicylate	Avoid Dairy Products, Spicy Foods And All Citrus Foods And Alcohol.
ehrid233	Hospital2	patient233	doctor2	Common Cold	acetaminophen (Tylenol)	2021-10-11 23:27:56	No lab tests exist	rid233	Common Cold	acetaminophen	Wash Your Hands Often, Avoid Touching Your Face, Don't Smoke And Maintain A Healthy Life Style.
ehrid519	Hospital2	patient519	doctor2	Common Cold	acetaminophen (Tylenol)	2020-09-05 10:56:21	No lab tests exist	rid519	Common Cold	acetaminophen	Wash Your Hands Often, Avoid Touching Your Face, Don't Smoke And Maintain A Healthy Life Style.
ehrid1330	Hospital1	patient1330	doctor1	Diarrhea	Loperamide, Bismuth	2020-01-22 23:16:49	Blood test,stool test,Clostridium difficile toxin test	rid1330	infections, travelers' diarrhea	subsalicylate	Avoid Dairy Products, Spicy Foods And All Citrus Foods And Alcohol.
ehrid657	Hospital2	patient657	doctor2	Asthma	Combination inhalers	2020-11-03 14:22:10	FeNO test, spirometry	rid657	Asthma	Theophylline -2 Nos	Avoid Smoke of Any Type, Control Asthma Triggers.
ehrid299	Hospital2	patient299	doctor2	Common Cold	acetaminophen (Tylenol)	2021-08-23 01:29:07	No lab tests exist	rid299	Common Cold	acetaminophen	Wash Your Hands Often, Avoid Touching Your Face, Don't Smoke And Maintain A Healthy Life Style.
ehrid1606	Hospital1	patient1606	doctor1	Diabetes	Metformin 250mg -2 Nos	2021-09-11 17:07:07	HbA1C,Fasting Blood Sugar Test	rid1606	Diabetes	Metformin 750mg -2 Nos	Regular Physical Activity - Success 30 Minutes A Day, Avoid Sugar, Ready To Eat Foods.
ehrid765	Hospital2	patient765	doctor2	Asthma	Combination inhalers	2021-12-09 13:22:08	FeNO test, spirometry	rid765	Asthma	Theophylline -2 Nos	Avoid Smoke of Any Type, Control Asthma Triggers.
ehrid1570	Hospital1	patient1570	doctor1	Diarrhea	Loperamide, Bismuth	2022-12-09 06:32:00	Blood test,stool test,Clostridium difficile toxin test	rid1570	infections, travelers' diarrhea	subsalicylate	Avoid Dairy Products, Spicy Foods And All Citrus Foods And Alcohol.
ehrid2264	Hospital1	patient2264	doctor1	Heart Disease	Aspirin 75mg,Pain Relieavers	2019-02-05 12:42:15	ECG,Blood Test,CT,MRI	rid2258	Heart Disease and Hypertension	thrombolytics	Regular Physical Activity - Success 30 Minutes A Day, Avoid Saturated And Trans Fat And Fried Foods, As Well As Snacky-Type Foods.
ehrid664	Hospital1	patient664	doctor1	Common Cold	acetaminophen (Tylenol)	2020-06-14 06:03:03	No lab tests exist	rid664	Common Cold	acetaminophen	Wash Your Hands Often, Avoid Touching Your Face, Don't Smoke And Maintain A Healthy Life Style.
ehrid968	Hospital1	patient968	doctor1	Diabetes	Metformin 250mg -2 Nos	2021-09-10 07:59:01	HbA1C,Fasting Blood Sugar Test	rid968	Diabetes	Metformin 750mg -2 Nos	Regular Physical Activity - Success 30 Minutes A Day, Avoid Sugar, Ready To Eat Foods.
ehrid1792	Hospital1	patient1792	doctor1	Tuberculosis	Rifater >600mg	2019-02-26 10:28:35	Rapid Sputum Test,T-Spot	rid1792	Tuberculosis	Isoniazid INH pills for 6/9 months	Skip Tobacco In All Forms , Don't Consume Alchohol And Limit Caffeinated Drinks.
ehrid954	Hospital1	patient954	doctor1	HIV/AIDS	antiretroviral therapy (ART)	2021-10-30 19:27:51	Antigen/antibody tests	rid954	HIV/AIDS	antiretroviral therapy	Do Not Shoot Drugs, Avoid Sex And Do Not Breastfeed And Follow Balanced Diet.
ehrid1923	Hospital2	patient1923	doctor2	Diarrhea	Loperamide, Bismuth	2022-10-28 11:26:36	Blood test,stool test,Clostridium difficile toxin test	rid1923	infections, travelers' diarrhea	subsalicylate	Avoid Dairy Products, Spicy Foods And All Citrus Foods And Alcohol.
ehrid1368	Hospital1	patient1368	doctor1	HIV/AIDS	antiretroviral therapy (ART)	2020-01-17 20:11:15	Antigen/antibody tests	rid1368	HIV/AIDS	antiretroviral therapy	Do Not Shoot Drugs, Avoid Sex And Do Not Breastfeed And Follow Balanced Diet.
ehrid258	Hospital1	patient258	doctor1	Common Cold	acetaminophen (Tylenol)	2021-07-09 14:40:48	No lab tests exist	rid258	Common Cold	acetaminophen	Wash Your Hands Often, Avoid Touching Your Face, Don't Smoke And Maintain A Healthy Life Style.
ehrid2260	Hospital1	patient2260	doctor1	Heart Disease	Aspirin 75mg,Pain Relieavers	2021-02-22 11:32:36	ECG,Blood Test,CT,MRI	rid2143	Heart Disease and Hypertension	thrombolytics	Regular Physical Activity - Success 30 Minutes A Day, Avoid Saturated And Trans Fat And Fried Foods, As Well As Snacky-Type Foods.
ehrid1226	Hospital1	patient1226	doctor1	Diarrhea	Loperamide, Bismuth	2021-11-03 06:39:59	Blood test,stool test,Clostridium difficile toxin test	rid1226	infections, travelers' diarrhea	subsalicylate	Avoid Dairy Products, Spicy Foods And All Citrus Foods And Alcohol.
ehrid509	Hospital2	patient509	doctor2	Common Cold	acetaminophen (Tylenol)	2022-12-31 02:29:43	No lab tests exist	rid509	Common Cold	acetaminophen	Wash Your Hands Often, Avoid Touching Your Face, Don't Smoke And Maintain A Healthy Life Style.
ehrid474	Hospital1	patient474	doctor1	Common Cold	acetaminophen (Tylenol)	2021-07-24 01:19:53	No lab tests exist	rid474	Common Cold	acetaminophen	Wash Your Hands Often, Avoid Touching Your Face, Don't Smoke And Maintain A Healthy Life Style.
ehrid1089	Hospital2	patient1089	doctor2	Asthma	Combination inhalers	2019-12-01 13:35:40	FeNO test, spirometry	rid1089	Asthma	Theophylline -2 Nos	Avoid Smoke of Any Type, Control Asthma Triggers.
ehrid640	Hospital1	patient640	doctor1	Diarrhea	Loperamide, Bismuth	2021-10-14 19:34:08	Blood test,stool test,Clostridium difficile toxin test	rid640	infections, travelers' diarrhea	subsalicylate	Avoid Dairy Products, Spicy Foods And All Citrus Foods And Alcohol.
ehrid568	Hospital1	patient568	doctor1	Common Cold	acetaminophen (Tylenol)	2021-03-20 03:25:40	No lab tests exist	rid568	Common Cold	acetaminophen	Wash Your Hands Often, Avoid Touching Your Face, Don't Smoke And Maintain A Healthy Life Style.
ehrid975	Hospital2	patient975	doctor2	Fever	paracetamol 500mg	2022-08-17 18:39:28	Blood Test and Urine Test	rid975	Fever	Acetaminophen injection	Avoid Caffeine And Alcohol, Stay Hydrated, Have Ample Amount Of Rest.
ehrid1984	Hospital1	patient1984	doctor1	Tuberculosis	Rifater >600mg	2021-11-28 17:50:02	Rapid Sputum Test,T-Spot	rid1984	Tuberculosis	Isoniazid INH pills for 6/9 months	Skip Tobacco In All Forms , Don't Consume Alchohol And Limit Caffeinated Drinks.
ehrid1977	Hospital2	patient1977	doctor2	Diarrhea	Loperamide, Bismuth	2022-11-21 13:08:49	Blood test,stool test,Clostridium difficile toxin test	rid1977	infections, travelers' diarrhea	subsalicylate	Avoid Dairy Products, Spicy Foods And All Citrus Foods And Alcohol.
ehrid829	Hospital2	patient829	doctor2	Common Cold	acetaminophen (Tylenol)	2022-09-02 21:43:10	No lab tests exist	rid829	Common Cold	acetaminophen	Wash Your Hands Often, Avoid Touching Your Face, Don't Smoke And Maintain A Healthy Life Style.
ehrid789	Hospital2	patient789	doctor2	Common Cold	acetaminophen (Tylenol)	2022-07-09 17:04:11	No lab tests exist	rid789	Common Cold	acetaminophen	Wash Your Hands Often, Avoid Touching Your Face, Don't Smoke And Maintain A Healthy Life Style.
ehrid585	Hospital2	patient585	doctor2	Asthma	Combination inhalers	2019-06-27 21:44:23	FeNO test, spirometry	rid585	Asthma	Theophylline -2 Nos	Avoid Smoke of Any Type, Control Asthma Triggers.
ehrid151	Hospital2	patient151	doctor2	Common Cold	acetaminophen (Tylenol)	2022-12-13 03:13:40	No lab tests exist	rid151	Common Cold	acetaminophen	Wash Your Hands Often, Avoid Touching Your Face, Don't Smoke And Maintain A Healthy Life Style.
ehrid1869	Hospital2	patient1869	doctor2	Stomach Cancer	5-FU (fluorouracil) and leucovorin (folinic acid)	2022-11-11 06:18:53	Upper endoscopy	rid1869	Stomach Cancer	chemotherapy	Choose Low-Fat Diary Products, Protien-Rich Foods.
ehrid179	Hospital2	patient179	doctor2	Common Cold	acetaminophen (Tylenol)	2021-03-03 18:18:59	No lab tests exist	rid179	Common Cold	acetaminophen	Wash Your Hands Often, Avoid Touching Your Face, Don't Smoke And Maintain A Healthy Life Style.
ehrid451	Hospital2	patient451	doctor2	Diabetes	Metformin 250mg -2 Nos	2019-03-14 23:10:14	HbA1C,Fasting Blood Sugar Test	rid451	Diabetes	Metformin 750mg -2 Nos	Regular Physical Activity - Success 30 Minutes A Day, Avoid Sugar, Ready To Eat Foods.
ehrid941	Hospital2	patient941	doctor2	Common Cold	acetaminophen (Tylenol)	2021-01-14 19:34:49	No lab tests exist	rid941	Common Cold	acetaminophen	Wash Your Hands Often, Avoid Touching Your Face, Don't Smoke And Maintain A Healthy Life Style.
ehrid1553	Hospital2	patient1553	doctor2	Diarrhea	Loperamide, Bismuth	2020-09-10 12:44:03	Blood test,stool test,Clostridium difficile toxin test	rid1553	infections, travelers' diarrhea	subsalicylate	Avoid Dairy Products, Spicy Foods And All Citrus Foods And Alcohol.
ehrid1405	Hospital2	patient1405	doctor2	Diarrhea	Loperamide, Bismuth	2021-11-09 02:52:53	Blood test,stool test,Clostridium difficile toxin test	rid1405	infections, travelers' diarrhea	subsalicylate	Avoid Dairy Products, Spicy Foods And All Citrus Foods And Alcohol.
ehrid822	Hospital1	patient822	doctor1	Common Cold	acetaminophen (Tylenol)	2022-09-07 11:06:36	No lab tests exist	rid822	Common Cold	acetaminophen	Wash Your Hands Often, Avoid Touching Your Face, Don't Smoke And Maintain A Healthy Life Style.
ehrid634	Hospital1	patient634	doctor1	Common Cold	acetaminophen (Tylenol)	2020-05-26 06:43:23	No lab tests exist	rid634	Common Cold	acetaminophen	Wash Your Hands Often, Avoid Touching Your Face, Don't Smoke And Maintain A Healthy Life Style.
ehrid648	Hospital1	patient648	doctor1	HIV/AIDS	antiretroviral therapy (ART)	2019-03-25 21:26:48	Antigen/antibody tests	rid648	HIV/AIDS	antiretroviral therapy	Do Not Shoot Drugs, Avoid Sex And Do Not Breastfeed And Follow Balanced Diet.
ehrid1456	Hospital1	patient1456	doctor1	Tuberculosis	Rifater >600mg	2022-01-06 18:03:27	Rapid Sputum Test,T-Spot	rid1456	Tuberculosis	Isoniazid INH pills for 6/9 months	Skip Tobacco In All Forms , Don't Consume Alchohol And Limit Caffeinated Drinks.
ehrid1256	Hospital1	patient1256	doctor1	Diarrhea	Loperamide, Bismuth	2021-08-20 09:27:14	Blood test,stool test,Clostridium difficile toxin test	rid1256	infections, travelers' diarrhea	subsalicylate	Avoid Dairy Products, Spicy Foods And All Citrus Foods And Alcohol.
ehrid556	Hospital1	patient556	doctor1	Common Cold	acetaminophen (Tylenol)	2022-12-03 07:58:37	No lab tests exist	rid556	Common Cold	acetaminophen	Wash Your Hands Often, Avoid Touching Your Face, Don't Smoke And Maintain A Healthy Life Style.
ehrid1810	Hospital1	patient1810	doctor1	Diarrhea	Loperamide, Bismuth	2022-09-27 20:46:28	Blood test,stool test,Clostridium difficile toxin test	rid1810	infections, travelers' diarrhea	subsalicylate	Avoid Dairy Products, Spicy Foods And All Citrus Foods And Alcohol.
ehrid1631	Hospital2	patient1631	doctor2	Diarrhea	Loperamide, Bismuth	2019-12-30 02:26:35	Blood test,stool test,Clostridium difficile toxin test	rid1631	infections, travelers' diarrhea	subsalicylate	Avoid Dairy Products, Spicy Foods And All Citrus Foods And Alcohol.
ehrid428	Hospital1	patient428	doctor1	Common Cold	acetaminophen (Tylenol)	2021-09-27 03:49:10	No lab tests exist	rid428	Common Cold	acetaminophen	Wash Your Hands Often, Avoid Touching Your Face, Don't Smoke And Maintain A Healthy Life Style.
ehrid1307	Hospital2	patient1307	doctor2	Diarrhea	Loperamide, Bismuth	2021-12-13 05:11:36	Blood test,stool test,Clostridium difficile toxin test	rid1307	infections, travelers' diarrhea	subsalicylate	Avoid Dairy Products, Spicy Foods And All Citrus Foods And Alcohol.
ehrid22	Hospital1	patient22	doctor1	Diabetes	Metformin 250mg -2 Nos	2019-05-01 01:40:39	HbA1C,Fasting Blood Sugar Test	rid22	Diabetes and Chorestrol	Metformin 750mg -2 Nos	Regular Physical Activity - Success 30 Minutes A Day, Avoid Sugar, Ready To Eat Foods.
ehrid1682	Hospital1	patient1682	doctor1	Diarrhea	Loperamide, Bismuth	2022-03-07 04:54:26	Blood test,stool test,Clostridium difficile toxin test	rid1682	infections, travelers' diarrhea	subsalicylate	Avoid Dairy Products, Spicy Foods And All Citrus Foods And Alcohol.
ehrid1619	Hospital2	patient1619	doctor2	Diarrhea	Loperamide, Bismuth	2021-06-08 20:42:03	Blood test,stool test,Clostridium difficile toxin test	rid1619	infections, travelers' diarrhea	subsalicylate	Avoid Dairy Products, Spicy Foods And All Citrus Foods And Alcohol.
ehrid1698	Hospital1	patient1698	doctor1	Diarrhea	Loperamide, Bismuth	2022-09-30 07:19:31	Blood test,stool test,Clostridium difficile toxin test	rid1698	infections, travelers' diarrhea	subsalicylate	Avoid Dairy Products, Spicy Foods And All Citrus Foods And Alcohol.
ehrid2166	Hospital2	patient2166	doctor1	Heart Disease	Aspirin 75mg,Pain Relieavers	2019-08-01 15:26:59	ECG,Blood Test,CT,MRI	rid2106	Heart Disease and Hypertension	thrombolytics	Regular Physical Activity - Success 30 Minutes A Day, Avoid Saturated And Trans Fat And Fried Foods, As Well As Snacky-Type Foods.
ehrid116	Hospital1	patient116	doctor1	Common Cold	acetaminophen (Tylenol)	2021-08-31 14:23:28	No lab tests exist	rid116	Common Cold	acetaminophen	Wash Your Hands Often, Avoid Touching Your Face, Don't Smoke And Maintain A Healthy Life Style.
ehrid2136	Hospital2	patient2136	doctor1	Heart Disease	Aspirin 75mg,Pain Relieavers	2022-05-16 00:03:24	ECG,Blood Test,CT,MRI	rid2139	Heart Disease and Hypertension	thrombolytics	Regular Physical Activity - Success 30 Minutes A Day, Avoid Saturated And Trans Fat And Fried Foods, As Well As Snacky-Type Foods.
ehrid1653	Hospital2	patient1653	doctor2	Malaria	Chloroquine phosphate	2019-02-26 11:31:45	Malaria Rapid Diagnostic Test	rid1653	Malaria	Artemether/Lumfantrine Treatment	Drink Plenty Of Water, Control Fats Intake, Consume Ripe Papaya, Sweet Lime, Grapes Which Are Rich in Vitamin C
ehrid69	Hospital2	patient69	doctor2	Common Cold	acetaminophen (Tylenol)	2019-09-24 18:26:03	No lab tests exist	rid69	Common Cold and Fever	acetaminophen	Wash Your Hands Often, Avoid Touching Your Face, Don't Smoke And Maintain A Healthy Life Style.
ehrid1294	Hospital1	patient1294	doctor1	Diarrhea	Loperamide, Bismuth	2022-07-13 19:27:25	Blood test,stool test,Clostridium difficile toxin test	rid1294	infections, travelers' diarrhea	subsalicylate	Avoid Dairy Products, Spicy Foods And All Citrus Foods And Alcohol.
ehrid2027	Hospital2	patient2027	doctor2	Diarrhea	Loperamide, Bismuth	2020-09-25 16:06:27	Blood test,stool test,Clostridium difficile toxin test	rid2027	infections, travelers' diarrhea	subsalicylate	Avoid Dairy Products, Spicy Foods And All Citrus Foods And Alcohol.
ehrid1154	Hospital1	patient1154	doctor1	Diarrhea	Loperamide, Bismuth	2022-06-13 16:59:33	Blood test,stool test,Clostridium difficile toxin test	rid1154	infections, travelers' diarrhea	subsalicylate	Avoid Dairy Products, Spicy Foods And All Citrus Foods And Alcohol.
ehrid420	Hospital1	patient420	doctor1	Stomach Cancer	5-FU (fluorouracil) and leucovorin (folinic acid)	2020-12-03 05:55:30	Upper endoscopy	rid420	Stomach Cancer	chemotherapy	Choose Low-Fat Diary Products, Protien-Rich Foods.
ehrid2131	Hospital2	patient2131	doctor2	Heart Disease	Aspirin 75mg,Pain Relieavers	2019-11-03 02:55:37	ECG,Blood Test,CT,MRI	rid2195	Heart Disease and Hypertension	thrombolytics	Regular Physical Activity - Success 30 Minutes A Day, Avoid Saturated And Trans Fat And Fried Foods, As Well As Snacky-Type Foods.
ehrid1431	Hospital2	patient1431	doctor2	Asthma	Combination inhalers	2020-11-04 09:04:59	FeNO test, spirometry	rid1431	Asthma	Theophylline -2 Nos	Avoid Smoke of Any Type, Control Asthma Triggers.
ehrid1205	Hospital2	patient1205	doctor2	Diarrhea	Loperamide, Bismuth	2022-03-14 16:24:29	Blood test,stool test,Clostridium difficile toxin test	rid1205	infections, travelers' diarrhea	subsalicylate	Avoid Dairy Products, Spicy Foods And All Citrus Foods And Alcohol.
ehrid336	Hospital1	patient336	doctor1	Stomach Cancer	5-FU (fluorouracil) and leucovorin (folinic acid)	2019-10-31 20:18:08	Upper endoscopy	rid336	Stomach Cancer	chemotherapy	Choose Low-Fat Diary Products, Protien-Rich Foods.
ehrid1782	Hospital1	patient1782	doctor1	HIV/AIDS	antiretroviral therapy (ART)	2021-11-30 07:29:41	Antigen/antibody tests	rid1782	HIV/AIDS	antiretroviral therapy	Do Not Shoot Drugs, Avoid Sex And Do Not Breastfeed And Follow Balanced Diet.
ehrid780	Hospital1	patient780	doctor1	Diarrhea	Loperamide, Bismuth	2021-07-11 08:42:45	Blood test,stool test,Clostridium difficile toxin test	rid780	infections, travelers' diarrhea	subsalicylate	Avoid Dairy Products, Spicy Foods And All Citrus Foods And Alcohol.
ehrid1885	Hospital2	patient1885	doctor2	Lung Cancer	Afinitor Disperz	2019-08-25 16:01:51	PET-CT scan,Chest X-ray	rid1885	Lung Cancer	Everolimus	Avoid Smoking Or passive Smoking.
ehrid1620	Hospital1	patient1620	doctor1	HIV/AIDS	antiretroviral therapy (ART)	2022-07-16 01:33:01	Antigen/antibody tests	rid1620	HIV/AIDS	antiretroviral therapy	Do Not Shoot Drugs, Avoid Sex And Do Not Breastfeed And Follow Balanced Diet.
ehrid1083	Hospital2	patient1083	doctor2	Malaria	Chloroquine phosphate	2019-09-21 06:24:45	Malaria Rapid Diagnostic Test	rid1083	Malaria	Artemether/Lumfantrine Treatment	Drink Plenty Of Water, Control Fats Intake, Consume Ripe Papaya, Sweet Lime, Grapes Which Are Rich in Vitamin C
ehrid2172	Hospital2	patient2172	doctor1	Heart Disease	Aspirin 75mg,Pain Relieavers	2021-06-10 06:35:28	ECG,Blood Test,CT,MRI	rid2161	Heart Disease and Hypertension	thrombolytics	Regular Physical Activity - Success 30 Minutes A Day, Avoid Saturated And Trans Fat And Fried Foods, As Well As Snacky-Type Foods.
ehrid988	Hospital1	patient988	doctor1	Malaria	Chloroquine phosphate	2019-09-02 06:39:38	Malaria Rapid Diagnostic Test	rid988	Malaria	Artemether/Lumfantrine Treatment	Drink Plenty Of Water, Control Fats Intake, Consume Ripe Papaya, Sweet Lime, Grapes Which Are Rich in Vitamin C
ehrid655	Hospital2	patient655	doctor2	Common Cold	acetaminophen (Tylenol)	2021-06-29 20:19:58	No lab tests exist	rid655	Common Cold	acetaminophen	Wash Your Hands Often, Avoid Touching Your Face, Don't Smoke And Maintain A Healthy Life Style.
ehrid2178	Hospital2	patient2178	doctor1	Heart Disease	Aspirin 75mg,Pain Relieavers	2021-05-26 19:23:27	ECG,Blood Test,CT,MRI	rid2126	Heart Disease and Hypertension	thrombolytics	Regular Physical Activity - Success 30 Minutes A Day, Avoid Saturated And Trans Fat And Fried Foods, As Well As Snacky-Type Foods.
ehrid1350	Hospital1	patient1350	doctor1	Fever	paracetamol 500mg	2020-02-23 16:37:10	Blood Test and Urine Test	rid1350	Fever	Acetaminophen injection	Avoid Caffeine And Alcohol, Stay Hydrated, Have Ample Amount Of Rest.
ehrid1186	Hospital1	patient1186	doctor1	Diarrhea	Loperamide, Bismuth	2021-11-26 05:57:11	Blood test,stool test,Clostridium difficile toxin test	rid1186	infections, travelers' diarrhea	subsalicylate	Avoid Dairy Products, Spicy Foods And All Citrus Foods And Alcohol.
ehrid1956	Hospital1	patient1956	doctor1	Cirrhosis	ursodiol	2020-03-21 10:29:21	liver biopsy	rid1956	Cirrhosis	ursodiol	Eat Foods Like Lean Protein Poultry Or Fish, Strictly Avoid Alcohol.
ehrid1041	Hospital2	patient1041	doctor2	Diarrhea	Loperamide, Bismuth	2022-08-28 09:56:35	Blood test,stool test,Clostridium difficile toxin test	rid1041	infections, travelers' diarrhea	subsalicylate	Avoid Dairy Products, Spicy Foods And All Citrus Foods And Alcohol.
ehrid2192	Hospital1	patient2192	doctor1	Heart Disease	Aspirin 75mg,Pain Relieavers	2019-07-12 02:18:48	ECG,Blood Test,CT,MRI	rid2192	Heart Disease and Hypertension	thrombolytics	Regular Physical Activity - Success 30 Minutes A Day, Avoid Saturated And Trans Fat And Fried Foods, As Well As Snacky-Type Foods.
ehrid1369	Hospital2	patient1369	doctor2	Diarrhea	Loperamide, Bismuth	2022-03-20 21:04:53	Blood test,stool test,Clostridium difficile toxin test	rid1369	infections, travelers' diarrhea	subsalicylate	Avoid Dairy Products, Spicy Foods And All Citrus Foods And Alcohol.
ehrid1879	Hospital2	patient1879	doctor2	Diarrhea	Loperamide, Bismuth	2022-01-28 01:04:58	Blood test,stool test,Clostridium difficile toxin test	rid1879	infections, travelers' diarrhea	subsalicylate	Avoid Dairy Products, Spicy Foods And All Citrus Foods And Alcohol.
ehrid1451	Hospital2	patient1451	doctor2	Diarrhea	Loperamide, Bismuth	2020-11-04 22:00:15	Blood test,stool test,Clostridium difficile toxin test	rid1451	infections, travelers' diarrhea	subsalicylate	Avoid Dairy Products, Spicy Foods And All Citrus Foods And Alcohol.
ehrid1044	Hospital1	patient1044	doctor1	HIV/AIDS	antiretroviral therapy (ART)	2022-04-09 03:52:24	Antigen/antibody tests	rid1044	HIV/AIDS	antiretroviral therapy	Do Not Shoot Drugs, Avoid Sex And Do Not Breastfeed And Follow Balanced Diet.
ehrid192	Hospital1	patient192	doctor1	Cirrhosis	ursodiol	2019-09-07 14:46:33	liver biopsy	rid192	Cirrhosis	ursodiol	Eat Foods Like Lean Protein Poultry Or Fish, Strictly Avoid Alcohol.
ehrid1385	Hospital2	patient1385	doctor2	Diarrhea	Loperamide, Bismuth	2020-12-17 22:25:03	Blood test,stool test,Clostridium difficile toxin test	rid1385	infections, travelers' diarrhea	subsalicylate	Avoid Dairy Products, Spicy Foods And All Citrus Foods And Alcohol.
ehrid1605	Hospital2	patient1605	doctor2	Alzheimer	Galantamine, rivastigmine	2021-08-06 00:08:26	MRI,CT	rid1605	Alzheimer	donepezil	Follow Mind Diet, Should Have <4 Servings A Week Of Red Meat, Less Than A Tablespoon Of Butter A Day.
ehrid1073	Hospital2	patient1073	doctor2	Diarrhea	Loperamide, Bismuth	2019-06-07 10:09:35	Blood test,stool test,Clostridium difficile toxin test	rid1073	infections, travelers' diarrhea	subsalicylate	Avoid Dairy Products, Spicy Foods And All Citrus Foods And Alcohol.
ehrid196	Hospital1	patient196	doctor1	Stroke	Aspirin 75mg,tPA	2020-01-31 06:11:30	CT ,MRI,Echocardiogram	rid196	Stroke	clopidogrel,dipyridamole	Avoid Sugar, Salt, Highly Processed Foods, Saturated And Trans Fats And Fried Foods.
ehrid457	Hospital2	patient457	doctor2	Common Cold	acetaminophen (Tylenol)	2022-08-24 21:57:52	No lab tests exist	rid457	Common Cold	acetaminophen	Wash Your Hands Often, Avoid Touching Your Face, Don't Smoke And Maintain A Healthy Life Style.
ehrid1510	Hospital1	patient1510	doctor1	Diarrhea	Loperamide, Bismuth	2019-01-16 19:48:04	Blood test,stool test,Clostridium difficile toxin test	rid1510	infections, travelers' diarrhea	subsalicylate	Avoid Dairy Products, Spicy Foods And All Citrus Foods And Alcohol.
ehrid2021	Hospital2	patient2021	doctor2	Diarrhea	Loperamide, Bismuth	2021-06-02 14:42:10	Blood test,stool test,Clostridium difficile toxin test	rid2021	infections, travelers' diarrhea	subsalicylate	Avoid Dairy Products, Spicy Foods And All Citrus Foods And Alcohol.
ehrid2024	Hospital1	patient2024	doctor1	Common Cold	acetaminophen (Tylenol)	2020-04-26 03:29:54	No lab tests exist	rid2024	Common Cold	acetaminophen	Wash Your Hands Often, Avoid Touching Your Face, Don't Smoke And Maintain A Healthy Life Style.
ehrid1865	Hospital2	patient1865	doctor2	Diarrhea	Loperamide, Bismuth	2019-04-05 03:08:04	Blood test,stool test,Clostridium difficile toxin test	rid1865	infections, travelers' diarrhea	subsalicylate	Avoid Dairy Products, Spicy Foods And All Citrus Foods And Alcohol.
ehrid1055	Hospital2	patient1055	doctor2	Diarrhea	Loperamide, Bismuth	2021-06-28 07:18:00	Blood test,stool test,Clostridium difficile toxin test	rid1055	infections, travelers' diarrhea	subsalicylate	Avoid Dairy Products, Spicy Foods And All Citrus Foods And Alcohol.
ehrid308	Hospital1	patient308	doctor1	Stroke	Aspirin 75mg,tPA	2020-09-03 17:38:10	CT ,MRI,Echocardiogram	rid308	Stroke	clopidogrel,dipyridamole	Avoid Sugar, Salt, Highly Processed Foods, Saturated And Trans Fats And Fried Foods.
ehrid1244	Hospital1	patient1244	doctor1	Diarrhea	Loperamide, Bismuth	2021-04-21 19:45:59	Blood test,stool test,Clostridium difficile toxin test	rid1244	infections, travelers' diarrhea	subsalicylate	Avoid Dairy Products, Spicy Foods And All Citrus Foods And Alcohol.
ehrid2028	Hospital1	patient2028	doctor1	Cirrhosis	ursodiol	2021-11-11 12:46:28	liver biopsy	rid2028	Cirrhosis	ursodiol	Eat Foods Like Lean Protein Poultry Or Fish, Strictly Avoid Alcohol.
ehrid533	Hospital2	patient533	doctor2	Lung Cancer	Afinitor Disperz	2019-08-08 08:42:58	PET-CT scan,Chest X-ray	rid533	Lung Cancer	Everolimus	Avoid Smoking Or passive Smoking.
ehrid25	Hospital2	patient25	doctor2	Fever	paracetamol 500mg	2022-02-19 01:22:07	Blood Test and Urine Test	rid25	Fever	Acetaminophen injection	Avoid Caffeine And Alcohol, Stay Hydrated, Have Ample Amount Of Rest.
ehrid1590	Hospital1	patient1590	doctor1	Diarrhea	Loperamide, Bismuth	2021-10-03 13:19:34	Blood test,stool test,Clostridium difficile toxin test	rid1590	infections, travelers' diarrhea	subsalicylate	Avoid Dairy Products, Spicy Foods And All Citrus Foods And Alcohol.
ehrid475	Hospital2	patient475	doctor2	Fever	paracetamol 500mg	2019-12-30 13:49:41	Blood Test and Urine Test	rid475	Fever	Acetaminophen injection	Avoid Caffeine And Alcohol, Stay Hydrated, Have Ample Amount Of Rest.
ehrid256	Hospital1	patient256	doctor1	Tuberculosis	Rifater >600mg	2020-01-30 13:28:30	Rapid Sputum Test,T-Spot	rid256	Tuberculosis	Isoniazid INH pills for 6/9 months	Skip Tobacco In All Forms , Don't Consume Alchohol And Limit Caffeinated Drinks.
ehrid1506	Hospital1	patient1506	doctor1	Diarrhea	Loperamide, Bismuth	2019-04-01 13:41:16	Blood test,stool test,Clostridium difficile toxin test	rid1506	infections, travelers' diarrhea	subsalicylate	Avoid Dairy Products, Spicy Foods And All Citrus Foods And Alcohol.
ehrid1997	Hospital2	patient1997	doctor2	Diarrhea	Loperamide, Bismuth	2020-05-21 21:56:36	Blood test,stool test,Clostridium difficile toxin test	rid1997	infections, travelers' diarrhea	subsalicylate	Avoid Dairy Products, Spicy Foods And All Citrus Foods And Alcohol.
ehrid2155	Hospital2	patient2155	doctor2	Heart Disease	Aspirin 75mg,Pain Relieavers	2021-01-28 04:09:02	ECG,Blood Test,CT,MRI	rid2112	Heart Disease and Hypertension	thrombolytics	Regular Physical Activity - Success 30 Minutes A Day, Avoid Saturated And Trans Fat And Fried Foods, As Well As Snacky-Type Foods.
ehrid1291	Hospital2	patient1291	doctor2	Diarrhea	Loperamide, Bismuth	2022-10-22 03:14:17	Blood test,stool test,Clostridium difficile toxin test	rid1291	infections, travelers' diarrhea	subsalicylate	Avoid Dairy Products, Spicy Foods And All Citrus Foods And Alcohol.
ehrid1354	Hospital1	patient1354	doctor1	Diarrhea	Loperamide, Bismuth	2021-05-10 03:19:48	Blood test,stool test,Clostridium difficile toxin test	rid1354	infections, travelers' diarrhea	subsalicylate	Avoid Dairy Products, Spicy Foods And All Citrus Foods And Alcohol.
ehrid217	Hospital2	patient217	doctor2	Common Cold	acetaminophen (Tylenol)	2019-02-19 07:02:28	No lab tests exist	rid217	Common Cold	acetaminophen	Wash Your Hands Often, Avoid Touching Your Face, Don't Smoke And Maintain A Healthy Life Style.
ehrid487	Hospital2	patient487	doctor2	Common Cold	acetaminophen (Tylenol)	2019-11-22 16:12:01	No lab tests exist	rid487	Common Cold	acetaminophen	Wash Your Hands Often, Avoid Touching Your Face, Don't Smoke And Maintain A Healthy Life Style.
ehrid811	Hospital2	patient811	doctor2	Common Cold	acetaminophen (Tylenol)	2022-06-25 05:59:39	No lab tests exist	rid811	Common Cold	acetaminophen	Wash Your Hands Often, Avoid Touching Your Face, Don't Smoke And Maintain A Healthy Life Style.
ehrid984	Hospital1	patient984	doctor1	Cirrhosis	ursodiol	2019-07-27 08:30:52	liver biopsy	rid984	Cirrhosis	ursodiol	Eat Foods Like Lean Protein Poultry Or Fish, Strictly Avoid Alcohol.
ehrid272	Hospital1	patient272	doctor1	Tuberculosis	Rifater >600mg	2019-05-30 06:53:20	Rapid Sputum Test,T-Spot	rid272	Tuberculosis	Isoniazid INH pills for 6/9 months	Skip Tobacco In All Forms , Don't Consume Alchohol And Limit Caffeinated Drinks.
ehrid1426	Hospital1	patient1426	doctor1	Common Cold	acetaminophen (Tylenol)	2022-01-15 09:03:16	No lab tests exist	rid1426	Common Cold	acetaminophen	Wash Your Hands Often, Avoid Touching Your Face, Don't Smoke And Maintain A Healthy Life Style.
ehrid1441	Hospital2	patient1441	doctor2	Diabetes	Metformin 250mg -2 Nos	2022-10-25 02:19:09	HbA1C,Fasting Blood Sugar Test	rid1441	Diabetes	Metformin 750mg -2 Nos	Regular Physical Activity - Success 30 Minutes A Day, Avoid Sugar, Ready To Eat Foods.
ehrid1034	Hospital1	patient1034	doctor1	Diabetes	Metformin 250mg -2 Nos	2020-03-18 17:53:09	HbA1C,Fasting Blood Sugar Test	rid1034	Diabetes	Metformin 750mg -2 Nos	Regular Physical Activity - Success 30 Minutes A Day, Avoid Sugar, Ready To Eat Foods.
ehrid1372	Hospital1	patient1372	doctor1	Stroke	Aspirin 75mg,tPA	2019-08-18 05:44:54	CT ,MRI,Echocardiogram	rid1372	Stroke	clopidogrel,dipyridamole	Avoid Sugar, Salt, Highly Processed Foods, Saturated And Trans Fats And Fried Foods.
ehrid1390	Hospital1	patient1390	doctor1	Diarrhea	Loperamide, Bismuth	2019-04-04 22:09:11	Blood test,stool test,Clostridium difficile toxin test	rid1390	infections, travelers' diarrhea	subsalicylate	Avoid Dairy Products, Spicy Foods And All Citrus Foods And Alcohol.
ehrid1848	Hospital1	patient1848	doctor1	Stomach Cancer	5-FU (fluorouracil) and leucovorin (folinic acid)	2022-03-19 11:31:19	Upper endoscopy	rid1848	Stomach Cancer	chemotherapy	Choose Low-Fat Diary Products, Protien-Rich Foods.
ehrid793	Hospital2	patient793	doctor2	Lung Cancer	Afinitor Disperz	2020-07-05 18:15:10	PET-CT scan,Chest X-ray	rid793	Lung Cancer	Everolimus	Avoid Smoking Or passive Smoking.
ehrid2068	Hospital1	patient2068	doctor1	Diabetes	Metformin 250mg -2 Nos	2021-08-23 16:38:05	HbA1C,Fasting Blood Sugar Test	rid2068	Diabetes	Metformin 750mg -2 Nos	Regular Physical Activity - Success 30 Minutes A Day, Avoid Sugar, Ready To Eat Foods.
ehrid1039	Hospital2	patient1039	doctor2	Diarrhea	Loperamide, Bismuth	2019-05-21 01:29:33	Blood test,stool test,Clostridium difficile toxin test	rid1039	infections, travelers' diarrhea	subsalicylate	Avoid Dairy Products, Spicy Foods And All Citrus Foods And Alcohol.
ehrid2216	Hospital1	patient2216	doctor1	Heart Disease	Aspirin 75mg,Pain Relieavers	2021-07-17 14:03:09	ECG,Blood Test,CT,MRI	rid2218	Heart Disease and Hypertension	thrombolytics	Regular Physical Activity - Success 30 Minutes A Day, Avoid Saturated And Trans Fat And Fried Foods, As Well As Snacky-Type Foods.
ehrid1	Hospital2	patient1	doctor2	Stomach Cancer	5-FU (fluorouracil) and leucovorin (folinic acid)	2019-06-12 04:52:35	Upper endoscopy	rid1	Stomach Cancer	chemotherapy	Choose Low-Fat Diary Products, Protien-Rich Foods.
ehrid1057	Hospital2	patient1057	doctor2	Diarrhea	Loperamide, Bismuth	2019-06-15 19:33:44	Blood test,stool test,Clostridium difficile toxin test	rid1057	infections, travelers' diarrhea	subsalicylate	Avoid Dairy Products, Spicy Foods And All Citrus Foods And Alcohol.
ehrid1145	Hospital2	patient1145	doctor2	Diarrhea	Loperamide, Bismuth	2021-09-08 09:35:06	Blood test,stool test,Clostridium difficile toxin test	rid1145	infections, travelers' diarrhea	subsalicylate	Avoid Dairy Products, Spicy Foods And All Citrus Foods And Alcohol.
ehrid306	Hospital1	patient306	doctor1	HIV/AIDS	antiretroviral therapy (ART)	2020-01-09 21:22:48	Antigen/antibody tests	rid306	HIV/AIDS	antiretroviral therapy	Do Not Shoot Drugs, Avoid Sex And Do Not Breastfeed And Follow Balanced Diet.
ehrid485	Hospital2	patient485	doctor2	Common Cold	acetaminophen (Tylenol)	2021-02-08 05:44:23	No lab tests exist	rid485	Common Cold	acetaminophen	Wash Your Hands Often, Avoid Touching Your Face, Don't Smoke And Maintain A Healthy Life Style.
ehrid2073	Hospital2	patient2073	doctor2	Diarrhea	Loperamide, Bismuth	2021-02-20 16:40:36	Blood test,stool test,Clostridium difficile toxin test	rid2073	infections, travelers' diarrhea	subsalicylate	Avoid Dairy Products, Spicy Foods And All Citrus Foods And Alcohol.
ehrid2201	Hospital1	patient2201	doctor2	Heart Disease	Aspirin 75mg,Pain Relieavers	2022-06-12 16:45:56	ECG,Blood Test,CT,MRI	rid2165	Heart Disease and Hypertension	thrombolytics	Regular Physical Activity - Success 30 Minutes A Day, Avoid Saturated And Trans Fat And Fried Foods, As Well As Snacky-Type Foods.
ehrid1540	Hospital1	patient1540	doctor1	Diarrhea	Loperamide, Bismuth	2019-10-09 02:28:16	Blood test,stool test,Clostridium difficile toxin test	rid1540	infections, travelers' diarrhea	subsalicylate	Avoid Dairy Products, Spicy Foods And All Citrus Foods And Alcohol.
ehrid1644	Hospital1	patient1644	doctor1	Cirrhosis	ursodiol	2022-12-04 10:50:14	liver biopsy	rid1644	Cirrhosis	ursodiol	Eat Foods Like Lean Protein Poultry Or Fish, Strictly Avoid Alcohol.
ehrid914	Hospital1	patient914	doctor1	Common Cold	acetaminophen (Tylenol)	2021-05-18 01:39:44	No lab tests exist	rid914	Common Cold	acetaminophen	Wash Your Hands Often, Avoid Touching Your Face, Don't Smoke And Maintain A Healthy Life Style.
ehrid2137	Hospital1	patient2137	doctor2	Heart Disease	Aspirin 75mg,Pain Relieavers	2020-05-03 08:58:04	ECG,Blood Test,CT,MRI	rid2146	Heart Disease and Hypertension	thrombolytics	Regular Physical Activity - Success 30 Minutes A Day, Avoid Saturated And Trans Fat And Fried Foods, As Well As Snacky-Type Foods.
ehrid443	Hospital2	patient443	doctor2	Common Cold	acetaminophen (Tylenol)	2022-08-25 09:43:45	No lab tests exist	rid443	Common Cold	acetaminophen	Wash Your Hands Often, Avoid Touching Your Face, Don't Smoke And Maintain A Healthy Life Style.
ehrid1061	Hospital2	patient1061	doctor2	Diarrhea	Loperamide, Bismuth	2020-08-12 18:29:11	Blood test,stool test,Clostridium difficile toxin test	rid1061	infections, travelers' diarrhea	subsalicylate	Avoid Dairy Products, Spicy Foods And All Citrus Foods And Alcohol.
ehrid1638	Hospital1	patient1638	doctor1	Stomach Cancer	5-FU (fluorouracil) and leucovorin (folinic acid)	2019-09-28 03:27:29	Upper endoscopy	rid1638	Stomach Cancer	chemotherapy	Choose Low-Fat Diary Products, Protien-Rich Foods.
ehrid1097	Hospital2	patient1097	doctor2	Diarrhea	Loperamide, Bismuth	2019-07-05 13:31:48	Blood test,stool test,Clostridium difficile toxin test	rid1097	infections, travelers' diarrhea	subsalicylate	Avoid Dairy Products, Spicy Foods And All Citrus Foods And Alcohol.
ehrid1305	Hospital2	patient1305	doctor2	Asthma	Combination inhalers	2022-06-21 10:48:19	FeNO test, spirometry	rid1305	Asthma	Theophylline -2 Nos	Avoid Smoke of Any Type, Control Asthma Triggers.
ehrid1514	Hospital1	patient1514	doctor1	Diarrhea	Loperamide, Bismuth	2019-08-17 09:07:36	Blood test,stool test,Clostridium difficile toxin test	rid1514	infections, travelers' diarrhea	subsalicylate	Avoid Dairy Products, Spicy Foods And All Citrus Foods And Alcohol.
ehrid2093	Hospital2	patient2093	doctor2	Common Cold	acetaminophen (Tylenol)	2019-10-17 04:11:44	No lab tests exist	rid2093	Common Cold	acetaminophen	Wash Your Hands Often, Avoid Touching Your Face, Don't Smoke And Maintain A Healthy Life Style.
ehrid1429	Hospital2	patient1429	doctor2	Diarrhea	Loperamide, Bismuth	2019-05-29 05:48:59	Blood test,stool test,Clostridium difficile toxin test	rid1429	infections, travelers' diarrhea	subsalicylate	Avoid Dairy Products, Spicy Foods And All Citrus Foods And Alcohol.
ehrid472	Hospital1	patient472	doctor1	Common Cold	acetaminophen (Tylenol)	2021-07-16 22:42:36	No lab tests exist	rid472	Common Cold	acetaminophen	Wash Your Hands Often, Avoid Touching Your Face, Don't Smoke And Maintain A Healthy Life Style.
ehrid715	Hospital2	patient715	doctor2	Lung Cancer	Afinitor Disperz	2019-02-12 10:54:32	PET-CT scan,Chest X-ray	rid715	Lung Cancer	Everolimus	Avoid Smoking Or passive Smoking.
ehrid992	Hospital1	patient992	doctor1	Tuberculosis	Rifater >600mg	2021-11-11 03:52:05	Rapid Sputum Test,T-Spot	rid992	Tuberculosis	Isoniazid INH pills for 6/9 months	Skip Tobacco In All Forms , Don't Consume Alchohol And Limit Caffeinated Drinks.
ehrid825	Hospital2	patient825	doctor2	Fever	paracetamol 500mg	2022-06-27 18:25:31	Blood Test and Urine Test	rid825	Fever	Acetaminophen injection	Avoid Caffeine And Alcohol, Stay Hydrated, Have Ample Amount Of Rest.
ehrid1559	Hospital2	patient1559	doctor2	Diarrhea	Loperamide, Bismuth	2020-08-10 17:45:47	Blood test,stool test,Clostridium difficile toxin test	rid1559	infections, travelers' diarrhea	subsalicylate	Avoid Dairy Products, Spicy Foods And All Citrus Foods And Alcohol.
ehrid500	Hospital1	patient500	doctor1	Fever	paracetamol 500mg	2019-01-22 13:15:35	Blood Test and Urine Test	rid500	Fever	Acetaminophen injection	Avoid Caffeine And Alcohol, Stay Hydrated, Have Ample Amount Of Rest.
ehrid183	Hospital2	patient183	doctor2	Common Cold	acetaminophen (Tylenol)	2019-03-31 23:00:59	No lab tests exist	rid183	Common Cold	acetaminophen	Wash Your Hands Often, Avoid Touching Your Face, Don't Smoke And Maintain A Healthy Life Style.
ehrid439	Hospital2	patient439	doctor2	Common Cold	acetaminophen (Tylenol)	2019-03-25 13:46:20	No lab tests exist	rid439	Common Cold	acetaminophen	Wash Your Hands Often, Avoid Touching Your Face, Don't Smoke And Maintain A Healthy Life Style.
ehrid834	Hospital1	patient834	doctor1	Common Cold	acetaminophen (Tylenol)	2019-12-01 18:33:19	No lab tests exist	rid834	Common Cold	acetaminophen	Wash Your Hands Often, Avoid Touching Your Face, Don't Smoke And Maintain A Healthy Life Style.
ehrid2023	Hospital2	patient2023	doctor2	Heart Disease	Aspirin 75mg,Pain Relieavers	2020-02-19 17:20:21	ECG,Blood Test,CT,MRI	rid2023	Heart Disease	thrombolytics	Regular Physical Activity - Success 30 Minutes A Day, Avoid Saturated And Trans Fat And Fried Foods, As Well As Snacky-Type Foods.
ehrid316	Hospital1	patient316	doctor1	Common Cold	acetaminophen (Tylenol)	2020-05-22 21:24:40	No lab tests exist	rid316	Common Cold	acetaminophen	Wash Your Hands Often, Avoid Touching Your Face, Don't Smoke And Maintain A Healthy Life Style.
ehrid1144	Hospital1	patient1144	doctor1	Lung Cancer	Afinitor Disperz	2019-04-06 08:51:14	PET-CT scan,Chest X-ray	rid1144	Lung Cancer	Everolimus	Avoid Smoking Or passive Smoking.
ehrid1273	Hospital2	patient1273	doctor2	Malaria	Chloroquine phosphate	2021-12-08 06:30:47	Malaria Rapid Diagnostic Test	rid1273	Malaria	Artemether/Lumfantrine Treatment	Drink Plenty Of Water, Control Fats Intake, Consume Ripe Papaya, Sweet Lime, Grapes Which Are Rich in Vitamin C
ehrid1818	Hospital1	patient1818	doctor1	HIV/AIDS	antiretroviral therapy (ART)	2020-05-05 08:40:54	Antigen/antibody tests	rid1818	HIV/AIDS	antiretroviral therapy	Do Not Shoot Drugs, Avoid Sex And Do Not Breastfeed And Follow Balanced Diet.
ehrid520	Hospital1	patient520	doctor1	Diarrhea	Loperamide, Bismuth	2019-04-24 07:18:12	Blood test,stool test,Clostridium difficile toxin test	rid520	infections, travelers' diarrhea	subsalicylate	Avoid Dairy Products, Spicy Foods And All Citrus Foods And Alcohol.
ehrid835	Hospital2	patient835	doctor2	Common Cold	acetaminophen (Tylenol)	2021-04-03 18:58:29	No lab tests exist	rid835	Common Cold	acetaminophen	Wash Your Hands Often, Avoid Touching Your Face, Don't Smoke And Maintain A Healthy Life Style.
ehrid1090	Hospital1	patient1090	doctor1	Diarrhea	Loperamide, Bismuth	2020-12-08 08:39:22	Blood test,stool test,Clostridium difficile toxin test	rid1090	infections, travelers' diarrhea	subsalicylate	Avoid Dairy Products, Spicy Foods And All Citrus Foods And Alcohol.
ehrid85	Hospital2	patient85	doctor2	Heart Disease	Aspirin 75mg,Pain Relieavers	2019-05-02 12:57:20	ECG,Blood Test,CT,MRI	rid85	Heart Disease and Hypertension	thrombolytics	Regular Physical Activity - Success 30 Minutes A Day, Avoid Saturated And Trans Fat And Fried Foods, As Well As Snacky-Type Foods.
ehrid891	Hospital2	patient891	doctor2	Asthma	Combination inhalers	2021-09-17 09:23:57	FeNO test, spirometry	rid891	Asthma	Theophylline -2 Nos	Avoid Smoke of Any Type, Control Asthma Triggers.
ehrid565	Hospital2	patient565	doctor2	Common Cold	acetaminophen (Tylenol)	2019-10-31 14:53:53	No lab tests exist	rid565	Common Cold	acetaminophen	Wash Your Hands Often, Avoid Touching Your Face, Don't Smoke And Maintain A Healthy Life Style.
ehrid1937	Hospital2	patient1937	doctor2	Lung Cancer	Afinitor Disperz	2021-12-03 05:33:09	PET-CT scan,Chest X-ray	rid1937	Lung Cancer	Everolimus	Avoid Smoking Or passive Smoking.
ehrid1136	Hospital1	patient1136	doctor1	Tuberculosis	Rifater >600mg	2021-05-24 18:18:49	Rapid Sputum Test,T-Spot	rid1136	Tuberculosis	Isoniazid INH pills for 6/9 months	Skip Tobacco In All Forms , Don't Consume Alchohol And Limit Caffeinated Drinks.
ehrid1726	Hospital1	patient1726	doctor1	Diarrhea	Loperamide, Bismuth	2021-03-30 22:56:02	Blood test,stool test,Clostridium difficile toxin test	rid1726	infections, travelers' diarrhea	subsalicylate	Avoid Dairy Products, Spicy Foods And All Citrus Foods And Alcohol.
ehrid907	Hospital2	patient907	doctor2	Common Cold	acetaminophen (Tylenol)	2022-04-07 14:07:56	No lab tests exist	rid907	Common Cold	acetaminophen	Wash Your Hands Often, Avoid Touching Your Face, Don't Smoke And Maintain A Healthy Life Style.
ehrid695	Hospital2	patient695	doctor2	Common Cold	acetaminophen (Tylenol)	2021-08-11 08:37:34	No lab tests exist	rid695	Common Cold	acetaminophen	Wash Your Hands Often, Avoid Touching Your Face, Don't Smoke And Maintain A Healthy Life Style.
ehrid552	Hospital1	patient552	doctor1	Common Cold	acetaminophen (Tylenol)	2020-01-06 18:11:56	No lab tests exist	rid552	Common Cold	acetaminophen	Wash Your Hands Often, Avoid Touching Your Face, Don't Smoke And Maintain A Healthy Life Style.
ehrid283	Hospital2	patient283	doctor2	Common Cold	acetaminophen (Tylenol)	2019-08-27 11:29:00	No lab tests exist	rid283	Common Cold	acetaminophen	Wash Your Hands Often, Avoid Touching Your Face, Don't Smoke And Maintain A Healthy Life Style.
ehrid1005	Hospital2	patient1005	doctor2	Alzheimer	Galantamine, rivastigmine	2020-09-10 18:04:13	MRI,CT	rid1005	Alzheimer	donepezil	Follow Mind Diet, Should Have <4 Servings A Week Of Red Meat, Less Than A Tablespoon Of Butter A Day.
ehrid613	Hospital2	patient613	doctor2	Common Cold	acetaminophen (Tylenol)	2019-12-27 04:02:47	No lab tests exist	rid613	Common Cold	acetaminophen	Wash Your Hands Often, Avoid Touching Your Face, Don't Smoke And Maintain A Healthy Life Style.
ehrid767	Hospital2	patient767	doctor2	Lung Cancer	Afinitor Disperz	2019-03-15 17:46:05	PET-CT scan,Chest X-ray	rid767	Lung Cancer	Everolimus	Avoid Smoking Or passive Smoking.
ehrid1812	Hospital1	patient1812	doctor1	Cirrhosis	ursodiol	2020-12-03 16:04:28	liver biopsy	rid1812	Cirrhosis	ursodiol	Eat Foods Like Lean Protein Poultry Or Fish, Strictly Avoid Alcohol.
ehrid1941	Hospital2	patient1941	doctor2	Diarrhea	Loperamide, Bismuth	2022-09-25 23:04:22	Blood test,stool test,Clostridium difficile toxin test	rid1941	infections, travelers' diarrhea	subsalicylate	Avoid Dairy Products, Spicy Foods And All Citrus Foods And Alcohol.
ehrid916	Hospital1	patient916	doctor1	Common Cold	acetaminophen (Tylenol)	2021-03-08 11:49:57	No lab tests exist	rid916	Common Cold	acetaminophen	Wash Your Hands Often, Avoid Touching Your Face, Don't Smoke And Maintain A Healthy Life Style.
ehrid1458	Hospital1	patient1458	doctor1	HIV/AIDS	antiretroviral therapy (ART)	2021-05-04 20:28:39	Antigen/antibody tests	rid1458	HIV/AIDS	antiretroviral therapy	Do Not Shoot Drugs, Avoid Sex And Do Not Breastfeed And Follow Balanced Diet.
ehrid1689	Hospital2	patient1689	doctor2	Diarrhea	Loperamide, Bismuth	2019-10-15 20:33:30	Blood test,stool test,Clostridium difficile toxin test	rid1689	infections, travelers' diarrhea	subsalicylate	Avoid Dairy Products, Spicy Foods And All Citrus Foods And Alcohol.
ehrid129	Hospital2	patient129	doctor2	Common Cold	acetaminophen (Tylenol)	2022-04-12 07:10:39	No lab tests exist	rid129	Common Cold	acetaminophen	Wash Your Hands Often, Avoid Touching Your Face, Don't Smoke And Maintain A Healthy Life Style.
ehrid184	Hospital1	patient184	doctor1	Common Cold	acetaminophen (Tylenol)	2019-03-16 01:42:15	No lab tests exist	rid184	Common Cold	acetaminophen	Wash Your Hands Often, Avoid Touching Your Face, Don't Smoke And Maintain A Healthy Life Style.
ehrid82	Hospital1	patient82	doctor1	Common Cold	acetaminophen (Tylenol)	2022-04-15 03:29:55	No lab tests exist	rid82	Common Cold and Fever	acetaminophen	Wash Your Hands Often, Avoid Touching Your Face, Don't Smoke And Maintain A Healthy Life Style.
ehrid1589	Hospital2	patient1589	doctor2	Diarrhea	Loperamide, Bismuth	2019-10-21 12:43:44	Blood test,stool test,Clostridium difficile toxin test	rid1589	infections, travelers' diarrhea	subsalicylate	Avoid Dairy Products, Spicy Foods And All Citrus Foods And Alcohol.
ehrid1472	Hospital1	patient1472	doctor1	Common Cold	acetaminophen (Tylenol)	2020-04-08 21:18:02	No lab tests exist	rid1472	Common Cold	acetaminophen	Wash Your Hands Often, Avoid Touching Your Face, Don't Smoke And Maintain A Healthy Life Style.
ehrid1780	Hospital1	patient1780	doctor1	Diarrhea	Loperamide, Bismuth	2022-07-21 13:12:27	Blood test,stool test,Clostridium difficile toxin test	rid1780	infections, travelers' diarrhea	subsalicylate	Avoid Dairy Products, Spicy Foods And All Citrus Foods And Alcohol.
ehrid1093	Hospital2	patient1093	doctor2	Diarrhea	Loperamide, Bismuth	2021-02-10 23:55:24	Blood test,stool test,Clostridium difficile toxin test	rid1093	infections, travelers' diarrhea	subsalicylate	Avoid Dairy Products, Spicy Foods And All Citrus Foods And Alcohol.
ehrid606	Hospital1	patient606	doctor1	Common Cold	acetaminophen (Tylenol)	2020-12-17 04:58:14	No lab tests exist	rid606	Common Cold	acetaminophen	Wash Your Hands Often, Avoid Touching Your Face, Don't Smoke And Maintain A Healthy Life Style.
ehrid1544	Hospital1	patient1544	doctor1	Diarrhea	Loperamide, Bismuth	2020-05-27 15:41:35	Blood test,stool test,Clostridium difficile toxin test	rid1544	infections, travelers' diarrhea	subsalicylate	Avoid Dairy Products, Spicy Foods And All Citrus Foods And Alcohol.
ehrid749	Hospital2	patient749	doctor2	Common Cold	acetaminophen (Tylenol)	2020-03-19 06:54:55	No lab tests exist	rid749	Common Cold	acetaminophen	Wash Your Hands Often, Avoid Touching Your Face, Don't Smoke And Maintain A Healthy Life Style.
ehrid531	Hospital2	patient531	doctor2	Asthma	Combination inhalers	2020-10-02 07:52:34	FeNO test, spirometry	rid531	Asthma	Theophylline -2 Nos	Avoid Smoke of Any Type, Control Asthma Triggers.
ehrid1255	Hospital2	patient1255	doctor2	Diarrhea	Loperamide, Bismuth	2022-11-04 23:02:55	Blood test,stool test,Clostridium difficile toxin test	rid1255	infections, travelers' diarrhea	subsalicylate	Avoid Dairy Products, Spicy Foods And All Citrus Foods And Alcohol.
ehrid1884	Hospital1	patient1884	doctor1	Cirrhosis	ursodiol	2021-08-26 15:09:38	liver biopsy	rid1884	Cirrhosis	ursodiol	Eat Foods Like Lean Protein Poultry Or Fish, Strictly Avoid Alcohol.
ehrid1331	Hospital2	patient1331	doctor2	Diabetes	Metformin 250mg -2 Nos	2021-01-30 17:04:02	HbA1C,Fasting Blood Sugar Test	rid1331	Diabetes	Metformin 750mg -2 Nos	Regular Physical Activity - Success 30 Minutes A Day, Avoid Sugar, Ready To Eat Foods.
ehrid1124	Hospital1	patient1124	doctor1	Diarrhea	Loperamide, Bismuth	2022-08-26 02:32:55	Blood test,stool test,Clostridium difficile toxin test	rid1124	infections, travelers' diarrhea	subsalicylate	Avoid Dairy Products, Spicy Foods And All Citrus Foods And Alcohol.
ehrid1282	Hospital1	patient1282	doctor1	Diarrhea	Loperamide, Bismuth	2020-07-31 12:44:14	Blood test,stool test,Clostridium difficile toxin test	rid1282	infections, travelers' diarrhea	subsalicylate	Avoid Dairy Products, Spicy Foods And All Citrus Foods And Alcohol.
ehrid2012	Hospital1	patient2012	doctor1	Diarrhea	Loperamide, Bismuth	2020-03-10 20:21:49	Blood test,stool test,Clostridium difficile toxin test	rid2012	infections, travelers' diarrhea	subsalicylate	Avoid Dairy Products, Spicy Foods And All Citrus Foods And Alcohol.
ehrid2147	Hospital1	patient2147	doctor2	Heart Disease	Aspirin 75mg,Pain Relieavers	2022-01-08 12:50:23	ECG,Blood Test,CT,MRI	rid2222	Heart Disease and Hypertension	thrombolytics	Regular Physical Activity - Success 30 Minutes A Day, Avoid Saturated And Trans Fat And Fried Foods, As Well As Snacky-Type Foods.
ehrid2243	Hospital2	patient2243	doctor2	Heart Disease	Aspirin 75mg,Pain Relieavers	2022-05-13 14:17:12	ECG,Blood Test,CT,MRI	rid2125	Heart Disease and Hypertension	thrombolytics	Regular Physical Activity - Success 30 Minutes A Day, Avoid Saturated And Trans Fat And Fried Foods, As Well As Snacky-Type Foods.
ehrid647	Hospital2	patient647	doctor2	Common Cold	acetaminophen (Tylenol)	2021-10-30 04:59:34	No lab tests exist	rid647	Common Cold	acetaminophen	Wash Your Hands Often, Avoid Touching Your Face, Don't Smoke And Maintain A Healthy Life Style.
ehrid1859	Hospital2	patient1859	doctor2	Lung Cancer	Afinitor Disperz	2022-12-25 20:19:03	PET-CT scan,Chest X-ray	rid1859	Lung Cancer	Everolimus	Avoid Smoking Or passive Smoking.
ehrid1771	Hospital2	patient1771	doctor2	Common Cold	acetaminophen (Tylenol)	2022-05-03 17:09:21	No lab tests exist	rid1771	Common Cold	acetaminophen	Wash Your Hands Often, Avoid Touching Your Face, Don't Smoke And Maintain A Healthy Life Style.
ehrid1341	Hospital2	patient1341	doctor2	Asthma	Combination inhalers	2020-03-11 18:22:40	FeNO test, spirometry	rid1341	Asthma	Theophylline -2 Nos	Avoid Smoke of Any Type, Control Asthma Triggers.
ehrid1438	Hospital1	patient1438	doctor1	Diarrhea	Loperamide, Bismuth	2019-08-01 10:52:51	Blood test,stool test,Clostridium difficile toxin test	rid1438	infections, travelers' diarrhea	subsalicylate	Avoid Dairy Products, Spicy Foods And All Citrus Foods And Alcohol.
ehrid221	Hospital2	patient221	doctor2	Heart Disease	Aspirin 75mg,Pain Relieavers	2022-10-10 16:51:49	ECG,Blood Test,CT,MRI	rid221	Heart Disease	thrombolytics	Regular Physical Activity - Success 30 Minutes A Day, Avoid Saturated And Trans Fat And Fried Foods, As Well As Snacky-Type Foods.
ehrid1241	Hospital2	patient1241	doctor2	Heart Disease	Aspirin 75mg,Pain Relieavers	2021-01-09 01:24:41	ECG,Blood Test,CT,MRI	rid1241	Heart Disease	thrombolytics	Regular Physical Activity - Success 30 Minutes A Day, Avoid Saturated And Trans Fat And Fried Foods, As Well As Snacky-Type Foods.
ehrid1132	Hospital1	patient1132	doctor1	Diarrhea	Loperamide, Bismuth	2020-09-26 23:55:36	Blood test,stool test,Clostridium difficile toxin test	rid1132	infections, travelers' diarrhea	subsalicylate	Avoid Dairy Products, Spicy Foods And All Citrus Foods And Alcohol.
ehrid799	Hospital2	patient799	doctor2	Heart Disease	Aspirin 75mg,Pain Relieavers	2021-03-10 17:26:04	ECG,Blood Test,CT,MRI	rid799	Heart Disease	thrombolytics	Regular Physical Activity - Success 30 Minutes A Day, Avoid Saturated And Trans Fat And Fried Foods, As Well As Snacky-Type Foods.
ehrid712	Hospital1	patient712	doctor1	Common Cold	acetaminophen (Tylenol)	2021-02-13 08:06:28	No lab tests exist	rid712	Common Cold	acetaminophen	Wash Your Hands Often, Avoid Touching Your Face, Don't Smoke And Maintain A Healthy Life Style.
ehrid2005	Hospital2	patient2005	doctor2	Diarrhea	Loperamide, Bismuth	2020-03-19 02:46:40	Blood test,stool test,Clostridium difficile toxin test	rid2005	infections, travelers' diarrhea	subsalicylate	Avoid Dairy Products, Spicy Foods And All Citrus Foods And Alcohol.
ehrid1938	Hospital1	patient1938	doctor1	Malaria	Chloroquine phosphate	2022-05-20 05:13:46	Malaria Rapid Diagnostic Test	rid1938	Malaria	Artemether/Lumfantrine Treatment	Drink Plenty Of Water, Control Fats Intake, Consume Ripe Papaya, Sweet Lime, Grapes Which Are Rich in Vitamin C
ehrid204	Hospital1	patient204	doctor1	Cirrhosis	ursodiol	2020-04-20 06:36:43	liver biopsy	rid204	Cirrhosis	ursodiol	Eat Foods Like Lean Protein Poultry Or Fish, Strictly Avoid Alcohol.
ehrid280	Hospital1	patient280	doctor1	Diarrhea	Loperamide, Bismuth	2022-06-17 19:52:15	Blood test,stool test,Clostridium difficile toxin test	rid280	infections, travelers' diarrhea	subsalicylate	Avoid Dairy Products, Spicy Foods And All Citrus Foods And Alcohol.
ehrid402	Hospital1	patient402	doctor1	Common Cold	acetaminophen (Tylenol)	2019-05-21 08:23:22	No lab tests exist	rid402	Common Cold	acetaminophen	Wash Your Hands Often, Avoid Touching Your Face, Don't Smoke And Maintain A Healthy Life Style.
ehrid1778	Hospital1	patient1778	doctor1	Stroke	Aspirin 75mg,tPA	2022-07-08 18:39:20	CT ,MRI,Echocardiogram	rid1778	Stroke	clopidogrel,dipyridamole	Avoid Sugar, Salt, Highly Processed Foods, Saturated And Trans Fats And Fried Foods.
ehrid2157	Hospital2	patient2157	doctor2	Heart Disease	Aspirin 75mg,Pain Relieavers	2020-10-15 07:23:17	ECG,Blood Test,CT,MRI	rid2122	Heart Disease and Hypertension	thrombolytics	Regular Physical Activity - Success 30 Minutes A Day, Avoid Saturated And Trans Fat And Fried Foods, As Well As Snacky-Type Foods.
ehrid2169	Hospital1	patient2169	doctor2	Heart Disease	Aspirin 75mg,Pain Relieavers	2022-10-02 12:51:44	ECG,Blood Test,CT,MRI	rid2202	Heart Disease and Hypertension	thrombolytics	Regular Physical Activity - Success 30 Minutes A Day, Avoid Saturated And Trans Fat And Fried Foods, As Well As Snacky-Type Foods.
ehrid1424	Hospital1	patient1424	doctor1	Tuberculosis	Rifater >600mg	2022-01-01 13:38:11	Rapid Sputum Test,T-Spot	rid1424	Tuberculosis	Isoniazid INH pills for 6/9 months	Skip Tobacco In All Forms , Don't Consume Alchohol And Limit Caffeinated Drinks.
ehrid1952	Hospital1	patient1952	doctor1	Tuberculosis	Rifater >600mg	2021-08-06 01:17:24	Rapid Sputum Test,T-Spot	rid1952	Tuberculosis	Isoniazid INH pills for 6/9 months	Skip Tobacco In All Forms , Don't Consume Alchohol And Limit Caffeinated Drinks.
ehrid2099	Hospital2	patient2099	doctor2	Heart Disease	Aspirin 75mg,Pain Relieavers	2020-05-19 12:01:09	ECG,Blood Test,CT,MRI	rid2245	Heart Disease and Hypertension	thrombolytics	Regular Physical Activity - Success 30 Minutes A Day, Avoid Saturated And Trans Fat And Fried Foods, As Well As Snacky-Type Foods.
ehrid1033	Hospital2	patient1033	doctor2	Diarrhea	Loperamide, Bismuth	2022-04-22 02:12:54	Blood test,stool test,Clostridium difficile toxin test	rid1033	infections, travelers' diarrhea	subsalicylate	Avoid Dairy Products, Spicy Foods And All Citrus Foods And Alcohol.
ehrid966	Hospital1	patient966	doctor1	Common Cold	acetaminophen (Tylenol)	2020-05-02 03:50:07	No lab tests exist	rid966	Common Cold	acetaminophen	Wash Your Hands Often, Avoid Touching Your Face, Don't Smoke And Maintain A Healthy Life Style.
ehrid311	Hospital2	patient311	doctor2	Common Cold	acetaminophen (Tylenol)	2019-01-29 22:27:47	No lab tests exist	rid311	Common Cold	acetaminophen	Wash Your Hands Often, Avoid Touching Your Face, Don't Smoke And Maintain A Healthy Life Style.
ehrid37	Hospital2	patient37	doctor2	Common Cold	acetaminophen (Tylenol)	2021-03-17 12:35:27	No lab tests exist	rid37	Common Cold and Fever	acetaminophen	Wash Your Hands Often, Avoid Touching Your Face, Don't Smoke And Maintain A Healthy Life Style.
ehrid2089	Hospital2	patient2089	doctor2	Diarrhea	Loperamide, Bismuth	2020-11-03 17:36:18	Blood test,stool test,Clostridium difficile toxin test	rid2089	infections, travelers' diarrhea	subsalicylate	Avoid Dairy Products, Spicy Foods And All Citrus Foods And Alcohol.
ehrid346	Hospital1	patient346	doctor1	Common Cold	acetaminophen (Tylenol)	2019-05-10 12:34:17	No lab tests exist	rid346	Common Cold	acetaminophen	Wash Your Hands Often, Avoid Touching Your Face, Don't Smoke And Maintain A Healthy Life Style.
ehrid455	Hospital2	patient455	doctor2	Lung Cancer	Afinitor Disperz	2022-04-25 08:55:20	PET-CT scan,Chest X-ray	rid455	Lung Cancer	Everolimus	Avoid Smoking Or passive Smoking.
ehrid845	Hospital2	patient845	doctor2	Lung Cancer	Afinitor Disperz	2022-10-07 12:56:05	PET-CT scan,Chest X-ray	rid845	Lung Cancer	Everolimus	Avoid Smoking Or passive Smoking.
ehrid826	Hospital1	patient826	doctor1	Stroke	Aspirin 75mg,tPA	2019-06-25 13:35:38	CT ,MRI,Echocardiogram	rid826	Stroke	clopidogrel,dipyridamole	Avoid Sugar, Salt, Highly Processed Foods, Saturated And Trans Fats And Fried Foods.
ehrid1475	Hospital2	patient1475	doctor2	Fever	paracetamol 500mg	2020-05-01 04:39:15	Blood Test and Urine Test	rid1475	Fever	Acetaminophen injection	Avoid Caffeine And Alcohol, Stay Hydrated, Have Ample Amount Of Rest.
ehrid867	Hospital2	patient867	doctor2	Heart Disease	Aspirin 75mg,Pain Relieavers	2022-11-26 10:03:47	ECG,Blood Test,CT,MRI	rid867	Heart Disease	thrombolytics	Regular Physical Activity - Success 30 Minutes A Day, Avoid Saturated And Trans Fat And Fried Foods, As Well As Snacky-Type Foods.
ehrid1635	Hospital2	patient1635	doctor2	Alzheimer	Galantamine, rivastigmine	2022-04-13 06:32:42	MRI,CT	rid1635	Alzheimer	donepezil	Follow Mind Diet, Should Have <4 Servings A Week Of Red Meat, Less Than A Tablespoon Of Butter A Day.
ehrid378	Hospital1	patient378	doctor1	Stomach Cancer	5-FU (fluorouracil) and leucovorin (folinic acid)	2022-05-26 03:29:53	Upper endoscopy	rid378	Stomach Cancer	chemotherapy	Choose Low-Fat Diary Products, Protien-Rich Foods.
ehrid499	Hospital2	patient499	doctor2	Common Cold	acetaminophen (Tylenol)	2019-03-20 09:41:36	No lab tests exist	rid499	Common Cold	acetaminophen	Wash Your Hands Often, Avoid Touching Your Face, Don't Smoke And Maintain A Healthy Life Style.
ehrid1591	Hospital2	patient1591	doctor2	Diarrhea	Loperamide, Bismuth	2019-09-05 02:43:04	Blood test,stool test,Clostridium difficile toxin test	rid1591	infections, travelers' diarrhea	subsalicylate	Avoid Dairy Products, Spicy Foods And All Citrus Foods And Alcohol.
ehrid34	Hospital1	patient34	doctor1	Heart Disease	Aspirin 75mg,Pain Relieavers	2019-03-05 18:49:16	ECG,Blood Test,CT,MRI	rid34	Heart Disease and Hypertension	thrombolytics	Regular Physical Activity - Success 30 Minutes A Day, Avoid Saturated And Trans Fat And Fried Foods, As Well As Snacky-Type Foods.
ehrid821	Hospital2	patient821	doctor2	Common Cold	acetaminophen (Tylenol)	2021-11-01 01:54:39	No lab tests exist	rid821	Common Cold	acetaminophen	Wash Your Hands Often, Avoid Touching Your Face, Don't Smoke And Maintain A Healthy Life Style.
ehrid405	Hospital2	patient405	doctor2	Asthma	Combination inhalers	2019-12-30 16:02:17	FeNO test, spirometry	rid405	Asthma	Theophylline -2 Nos	Avoid Smoke of Any Type, Control Asthma Triggers.
ehrid842	Hospital1	patient842	doctor1	Common Cold	acetaminophen (Tylenol)	2021-07-21 13:29:22	No lab tests exist	rid842	Common Cold	acetaminophen	Wash Your Hands Often, Avoid Touching Your Face, Don't Smoke And Maintain A Healthy Life Style.
ehrid434	Hospital1	patient434	doctor1	Stroke	Aspirin 75mg,tPA	2021-04-28 23:16:13	CT ,MRI,Echocardiogram	rid434	Stroke	clopidogrel,dipyridamole	Avoid Sugar, Salt, Highly Processed Foods, Saturated And Trans Fats And Fried Foods.
ehrid831	Hospital2	patient831	doctor2	Common Cold	acetaminophen (Tylenol)	2022-10-22 11:49:13	No lab tests exist	rid831	Common Cold	acetaminophen	Wash Your Hands Often, Avoid Touching Your Face, Don't Smoke And Maintain A Healthy Life Style.
ehrid27	Hospital2	patient27	doctor2	Asthma	Combination inhalers	2021-06-20 10:45:28	FeNO test, spirometry	rid27	Asthma	Theophylline -2 Nos	Avoid Smoke of Any Type, Control Asthma Triggers.
ehrid388	Hospital1	patient388	doctor1	Common Cold	acetaminophen (Tylenol)	2021-08-01 18:01:27	No lab tests exist	rid388	Common Cold	acetaminophen	Wash Your Hands Often, Avoid Touching Your Face, Don't Smoke And Maintain A Healthy Life Style.
ehrid2083	Hospital2	patient2083	doctor2	Diarrhea	Loperamide, Bismuth	2020-09-11 23:13:37	Blood test,stool test,Clostridium difficile toxin test	rid2083	infections, travelers' diarrhea	subsalicylate	Avoid Dairy Products, Spicy Foods And All Citrus Foods And Alcohol.
ehrid1543	Hospital2	patient1543	doctor2	Diarrhea	Loperamide, Bismuth	2021-12-04 04:01:05	Blood test,stool test,Clostridium difficile toxin test	rid1543	infections, travelers' diarrhea	subsalicylate	Avoid Dairy Products, Spicy Foods And All Citrus Foods And Alcohol.
ehrid652	Hospital1	patient652	doctor1	Common Cold	acetaminophen (Tylenol)	2020-09-17 01:29:43	No lab tests exist	rid652	Common Cold	acetaminophen	Wash Your Hands Often, Avoid Touching Your Face, Don't Smoke And Maintain A Healthy Life Style.
ehrid1845	Hospital2	patient1845	doctor2	Asthma	Combination inhalers	2022-06-06 06:15:10	FeNO test, spirometry	rid1845	Asthma	Theophylline -2 Nos	Avoid Smoke of Any Type, Control Asthma Triggers.
ehrid1796	Hospital1	patient1796	doctor1	Diarrhea	Loperamide, Bismuth	2020-08-18 11:54:51	Blood test,stool test,Clostridium difficile toxin test	rid1796	infections, travelers' diarrhea	subsalicylate	Avoid Dairy Products, Spicy Foods And All Citrus Foods And Alcohol.
ehrid2262	Hospital1	patient2262	doctor1	Heart Disease	Aspirin 75mg,Pain Relieavers	2021-05-03 17:38:26	ECG,Blood Test,CT,MRI	rid2130	Heart Disease and Hypertension	thrombolytics	Regular Physical Activity - Success 30 Minutes A Day, Avoid Saturated And Trans Fat And Fried Foods, As Well As Snacky-Type Foods.
ehrid163	Hospital2	patient163	doctor2	Common Cold	acetaminophen (Tylenol)	2019-06-14 19:59:38	No lab tests exist	rid163	Common Cold	acetaminophen	Wash Your Hands Often, Avoid Touching Your Face, Don't Smoke And Maintain A Healthy Life Style.
ehrid58	Hospital1	patient58	doctor1	Common Cold	acetaminophen (Tylenol)	2021-06-20 07:16:15	No lab tests exist	rid58	Common Cold and Fever	acetaminophen	Wash Your Hands Often, Avoid Touching Your Face, Don't Smoke And Maintain A Healthy Life Style.
ehrid1319	Hospital2	patient1319	doctor2	Diarrhea	Loperamide, Bismuth	2019-01-19 11:38:25	Blood test,stool test,Clostridium difficile toxin test	rid1319	infections, travelers' diarrhea	subsalicylate	Avoid Dairy Products, Spicy Foods And All Citrus Foods And Alcohol.
ehrid1095	Hospital2	patient1095	doctor2	Alzheimer	Galantamine, rivastigmine	2022-11-16 12:43:59	MRI,CT	rid1095	Alzheimer	donepezil	Follow Mind Diet, Should Have <4 Servings A Week Of Red Meat, Less Than A Tablespoon Of Butter A Day.
ehrid199	Hospital2	patient199	doctor2	Common Cold	acetaminophen (Tylenol)	2020-03-06 11:44:18	No lab tests exist	rid199	Common Cold	acetaminophen	Wash Your Hands Often, Avoid Touching Your Face, Don't Smoke And Maintain A Healthy Life Style.
ehrid229	Hospital2	patient229	doctor2	Common Cold	acetaminophen (Tylenol)	2022-05-31 01:40:31	No lab tests exist	rid229	Common Cold	acetaminophen	Wash Your Hands Often, Avoid Touching Your Face, Don't Smoke And Maintain A Healthy Life Style.
ehrid1561	Hospital2	patient1561	doctor2	Diarrhea	Loperamide, Bismuth	2019-01-17 15:50:09	Blood test,stool test,Clostridium difficile toxin test	rid1561	infections, travelers' diarrhea	subsalicylate	Avoid Dairy Products, Spicy Foods And All Citrus Foods And Alcohol.
ehrid905	Hospital2	patient905	doctor2	Common Cold	acetaminophen (Tylenol)	2020-08-18 03:46:44	No lab tests exist	rid905	Common Cold	acetaminophen	Wash Your Hands Often, Avoid Touching Your Face, Don't Smoke And Maintain A Healthy Life Style.
ehrid2215	Hospital2	patient2215	doctor2	Heart Disease	Aspirin 75mg,Pain Relieavers	2019-07-15 05:56:08	ECG,Blood Test,CT,MRI	rid2170	Heart Disease and Hypertension	thrombolytics	Regular Physical Activity - Success 30 Minutes A Day, Avoid Saturated And Trans Fat And Fried Foods, As Well As Snacky-Type Foods.
ehrid1686	Hospital1	patient1686	doctor1	Diarrhea	Loperamide, Bismuth	2021-09-03 11:16:32	Blood test,stool test,Clostridium difficile toxin test	rid1686	infections, travelers' diarrhea	subsalicylate	Avoid Dairy Products, Spicy Foods And All Citrus Foods And Alcohol.
ehrid957	Hospital2	patient957	doctor2	Diabetes	Metformin 250mg -2 Nos	2021-10-30 20:39:09	HbA1C,Fasting Blood Sugar Test	rid957	Diabetes	Metformin 750mg -2 Nos	Regular Physical Activity - Success 30 Minutes A Day, Avoid Sugar, Ready To Eat Foods.
ehrid1933	Hospital2	patient1933	doctor2	Diarrhea	Loperamide, Bismuth	2020-03-08 07:52:09	Blood test,stool test,Clostridium difficile toxin test	rid1933	infections, travelers' diarrhea	subsalicylate	Avoid Dairy Products, Spicy Foods And All Citrus Foods And Alcohol.
ehrid182	Hospital1	patient182	doctor1	Lung Cancer	Afinitor Disperz	2022-07-06 11:33:08	PET-CT scan,Chest X-ray	rid182	Lung Cancer	Everolimus	Avoid Smoking Or passive Smoking.
ehrid1317	Hospital2	patient1317	doctor2	Diarrhea	Loperamide, Bismuth	2020-07-06 23:55:33	Blood test,stool test,Clostridium difficile toxin test	rid1317	infections, travelers' diarrhea	subsalicylate	Avoid Dairy Products, Spicy Foods And All Citrus Foods And Alcohol.
ehrid1802	Hospital1	patient1802	doctor1	Heart Disease	Aspirin 75mg,Pain Relieavers	2021-03-27 17:37:49	ECG,Blood Test,CT,MRI	rid1802	Heart Disease	thrombolytics	Regular Physical Activity - Success 30 Minutes A Day, Avoid Saturated And Trans Fat And Fried Foods, As Well As Snacky-Type Foods.
ehrid352	Hospital1	patient352	doctor1	Tuberculosis	Rifater >600mg	2022-05-08 03:11:00	Rapid Sputum Test,T-Spot	rid352	Tuberculosis	Isoniazid INH pills for 6/9 months	Skip Tobacco In All Forms , Don't Consume Alchohol And Limit Caffeinated Drinks.
ehrid2055	Hospital2	patient2055	doctor2	Alzheimer	Galantamine, rivastigmine	2022-10-24 02:27:03	MRI,CT	rid2055	Alzheimer	donepezil	Follow Mind Diet, Should Have <4 Servings A Week Of Red Meat, Less Than A Tablespoon Of Butter A Day.
ehrid654	Hospital1	patient654	doctor1	Common Cold	acetaminophen (Tylenol)	2021-11-16 15:12:12	No lab tests exist	rid654	Common Cold	acetaminophen	Wash Your Hands Often, Avoid Touching Your Face, Don't Smoke And Maintain A Healthy Life Style.
ehrid2049	Hospital2	patient2049	doctor2	Diarrhea	Loperamide, Bismuth	2021-02-24 12:23:59	Blood test,stool test,Clostridium difficile toxin test	rid2049	infections, travelers' diarrhea	subsalicylate	Avoid Dairy Products, Spicy Foods And All Citrus Foods And Alcohol.
ehrid1684	Hospital1	patient1684	doctor1	Diarrhea	Loperamide, Bismuth	2019-03-31 11:35:21	Blood test,stool test,Clostridium difficile toxin test	rid1684	infections, travelers' diarrhea	subsalicylate	Avoid Dairy Products, Spicy Foods And All Citrus Foods And Alcohol.
ehrid471	Hospital2	patient471	doctor2	Common Cold	acetaminophen (Tylenol)	2021-07-13 01:41:36	No lab tests exist	rid471	Common Cold	acetaminophen	Wash Your Hands Often, Avoid Touching Your Face, Don't Smoke And Maintain A Healthy Life Style.
ehrid798	Hospital1	patient798	doctor1	Stomach Cancer	5-FU (fluorouracil) and leucovorin (folinic acid)	2020-07-30 15:37:14	Upper endoscopy	rid798	Stomach Cancer	chemotherapy	Choose Low-Fat Diary Products, Protien-Rich Foods.
ehrid1066	Hospital1	patient1066	doctor1	Lung Cancer	Afinitor Disperz	2020-09-25 05:41:44	PET-CT scan,Chest X-ray	rid1066	Lung Cancer	Everolimus	Avoid Smoking Or passive Smoking.
ehrid570	Hospital1	patient570	doctor1	Diarrhea	Loperamide, Bismuth	2020-08-15 08:24:45	Blood test,stool test,Clostridium difficile toxin test	rid570	infections, travelers' diarrhea	subsalicylate	Avoid Dairy Products, Spicy Foods And All Citrus Foods And Alcohol.
ehrid1968	Hospital1	patient1968	doctor1	Cirrhosis	ursodiol	2021-12-29 06:23:08	liver biopsy	rid1968	Cirrhosis	ursodiol	Eat Foods Like Lean Protein Poultry Or Fish, Strictly Avoid Alcohol.
ehrid1871	Hospital2	patient1871	doctor2	Diarrhea	Loperamide, Bismuth	2020-02-28 13:40:48	Blood test,stool test,Clostridium difficile toxin test	rid1871	infections, travelers' diarrhea	subsalicylate	Avoid Dairy Products, Spicy Foods And All Citrus Foods And Alcohol.
ehrid779	Hospital2	patient779	doctor2	Malaria	Chloroquine phosphate	2021-11-30 18:47:48	Malaria Rapid Diagnostic Test	rid779	Malaria	Artemether/Lumfantrine Treatment	Drink Plenty Of Water, Control Fats Intake, Consume Ripe Papaya, Sweet Lime, Grapes Which Are Rich in Vitamin C
ehrid421	Hospital2	patient421	doctor2	Common Cold	acetaminophen (Tylenol)	2020-06-04 04:25:56	No lab tests exist	rid421	Common Cold	acetaminophen	Wash Your Hands Often, Avoid Touching Your Face, Don't Smoke And Maintain A Healthy Life Style.
ehrid358	Hospital1	patient358	doctor1	Common Cold	acetaminophen (Tylenol)	2022-03-27 11:22:43	No lab tests exist	rid358	Common Cold	acetaminophen	Wash Your Hands Often, Avoid Touching Your Face, Don't Smoke And Maintain A Healthy Life Style.
ehrid1978	Hospital1	patient1978	doctor1	Common Cold	acetaminophen (Tylenol)	2019-12-24 14:02:49	No lab tests exist	rid1978	Common Cold	acetaminophen	Wash Your Hands Often, Avoid Touching Your Face, Don't Smoke And Maintain A Healthy Life Style.
ehrid2148	Hospital2	patient2148	doctor1	Heart Disease	Aspirin 75mg,Pain Relieavers	2021-05-10 10:33:57	ECG,Blood Test,CT,MRI	rid2116	Heart Disease and Hypertension	thrombolytics	Regular Physical Activity - Success 30 Minutes A Day, Avoid Saturated And Trans Fat And Fried Foods, As Well As Snacky-Type Foods.
ehrid609	Hospital2	patient609	doctor2	Stomach Cancer	5-FU (fluorouracil) and leucovorin (folinic acid)	2022-04-04 09:19:57	Upper endoscopy	rid609	Stomach Cancer	chemotherapy	Choose Low-Fat Diary Products, Protien-Rich Foods.
ehrid1442	Hospital1	patient1442	doctor1	Stroke	Aspirin 75mg,tPA	2022-09-18 07:19:09	CT ,MRI,Echocardiogram	rid1442	Stroke	clopidogrel,dipyridamole	Avoid Sugar, Salt, Highly Processed Foods, Saturated And Trans Fats And Fried Foods.
ehrid1160	Hospital1	patient1160	doctor1	Diarrhea	Loperamide, Bismuth	2019-01-30 02:21:19	Blood test,stool test,Clostridium difficile toxin test	rid1160	infections, travelers' diarrhea	subsalicylate	Avoid Dairy Products, Spicy Foods And All Citrus Foods And Alcohol.
ehrid426	Hospital1	patient426	doctor1	Common Cold	acetaminophen (Tylenol)	2019-08-28 03:26:33	No lab tests exist	rid426	Common Cold	acetaminophen	Wash Your Hands Often, Avoid Touching Your Face, Don't Smoke And Maintain A Healthy Life Style.
ehrid2199	Hospital1	patient2199	doctor2	Heart Disease	Aspirin 75mg,Pain Relieavers	2022-08-27 19:27:22	ECG,Blood Test,CT,MRI	rid2160	Heart Disease and Hypertension	thrombolytics	Regular Physical Activity - Success 30 Minutes A Day, Avoid Saturated And Trans Fat And Fried Foods, As Well As Snacky-Type Foods.
ehrid2258	Hospital1	patient2258	doctor1	Heart Disease	Aspirin 75mg,Pain Relieavers	2020-10-22 05:47:17	ECG,Blood Test,CT,MRI	rid2188	Heart Disease and Hypertension	thrombolytics	Regular Physical Activity - Success 30 Minutes A Day, Avoid Saturated And Trans Fat And Fried Foods, As Well As Snacky-Type Foods.
ehrid1185	Hospital2	patient1185	doctor2	Alzheimer	Galantamine, rivastigmine	2021-01-28 00:59:37	MRI,CT	rid1185	Alzheimer	donepezil	Follow Mind Diet, Should Have <4 Servings A Week Of Red Meat, Less Than A Tablespoon Of Butter A Day.
ehrid331	Hospital2	patient331	doctor2	Common Cold	acetaminophen (Tylenol)	2021-04-20 18:16:13	No lab tests exist	rid331	Common Cold	acetaminophen	Wash Your Hands Often, Avoid Touching Your Face, Don't Smoke And Maintain A Healthy Life Style.
ehrid1889	Hospital2	patient1889	doctor2	Diarrhea	Loperamide, Bismuth	2019-03-14 00:32:23	Blood test,stool test,Clostridium difficile toxin test	rid1889	infections, travelers' diarrhea	subsalicylate	Avoid Dairy Products, Spicy Foods And All Citrus Foods And Alcohol.
ehrid1130	Hospital1	patient1130	doctor1	Diarrhea	Loperamide, Bismuth	2022-08-31 05:28:09	Blood test,stool test,Clostridium difficile toxin test	rid1130	infections, travelers' diarrhea	subsalicylate	Avoid Dairy Products, Spicy Foods And All Citrus Foods And Alcohol.
ehrid911	Hospital2	patient911	doctor2	Common Cold	acetaminophen (Tylenol)	2019-10-21 21:08:25	No lab tests exist	rid911	Common Cold	acetaminophen	Wash Your Hands Often, Avoid Touching Your Face, Don't Smoke And Maintain A Healthy Life Style.
ehrid115	Hospital2	patient115	doctor2	Common Cold	acetaminophen (Tylenol)	2022-11-07 21:36:11	No lab tests exist	rid115	Common Cold	acetaminophen	Wash Your Hands Often, Avoid Touching Your Face, Don't Smoke And Maintain A Healthy Life Style.
ehrid479	Hospital2	patient479	doctor2	Common Cold	acetaminophen (Tylenol)	2022-08-03 10:52:22	No lab tests exist	rid479	Common Cold	acetaminophen	Wash Your Hands Often, Avoid Touching Your Face, Don't Smoke And Maintain A Healthy Life Style.
ehrid5	Hospital2	patient5	doctor2	Common Cold	acetaminophen (Tylenol)	2021-12-21 06:46:56	No lab tests exist	rid5	Common Cold and Fever	acetaminophen	Wash Your Hands Often, Avoid Touching Your Face, Don't Smoke And Maintain A Healthy Life Style.
ehrid669	Hospital2	patient669	doctor2	Common Cold	acetaminophen (Tylenol)	2021-05-25 02:50:55	No lab tests exist	rid669	Common Cold	acetaminophen	Wash Your Hands Often, Avoid Touching Your Face, Don't Smoke And Maintain A Healthy Life Style.
ehrid1836	Hospital1	patient1836	doctor1	HIV/AIDS	antiretroviral therapy (ART)	2021-09-12 23:05:12	Antigen/antibody tests	rid1836	HIV/AIDS	antiretroviral therapy	Do Not Shoot Drugs, Avoid Sex And Do Not Breastfeed And Follow Balanced Diet.
ehrid1496	Hospital1	patient1496	doctor1	Heart Disease	Aspirin 75mg,Pain Relieavers	2021-10-15 00:32:29	ECG,Blood Test,CT,MRI	rid1496	Heart Disease	thrombolytics	Regular Physical Activity - Success 30 Minutes A Day, Avoid Saturated And Trans Fat And Fried Foods, As Well As Snacky-Type Foods.
ehrid456	Hospital1	patient456	doctor1	Cirrhosis	ursodiol	2021-12-24 21:22:22	liver biopsy	rid456	Cirrhosis	ursodiol	Eat Foods Like Lean Protein Poultry Or Fish, Strictly Avoid Alcohol.
ehrid264	Hospital1	patient264	doctor1	Cirrhosis	ursodiol	2019-06-14 07:18:05	liver biopsy	rid264	Cirrhosis	ursodiol	Eat Foods Like Lean Protein Poultry Or Fish, Strictly Avoid Alcohol.
ehrid1466	Hospital1	patient1466	doctor1	Diarrhea	Loperamide, Bismuth	2022-08-08 21:39:23	Blood test,stool test,Clostridium difficile toxin test	rid1466	infections, travelers' diarrhea	subsalicylate	Avoid Dairy Products, Spicy Foods And All Citrus Foods And Alcohol.
ehrid145	Hospital2	patient145	doctor2	Common Cold	acetaminophen (Tylenol)	2019-08-04 17:32:31	No lab tests exist	rid145	Common Cold	acetaminophen	Wash Your Hands Often, Avoid Touching Your Face, Don't Smoke And Maintain A Healthy Life Style.
ehrid1281	Hospital2	patient1281	doctor2	Stomach Cancer	5-FU (fluorouracil) and leucovorin (folinic acid)	2020-06-21 20:21:35	Upper endoscopy	rid1281	Stomach Cancer	chemotherapy	Choose Low-Fat Diary Products, Protien-Rich Foods.
ehrid1572	Hospital1	patient1572	doctor1	Cirrhosis	ursodiol	2019-04-08 15:31:58	liver biopsy	rid1572	Cirrhosis	ursodiol	Eat Foods Like Lean Protein Poultry Or Fish, Strictly Avoid Alcohol.
ehrid663	Hospital2	patient663	doctor2	Heart Disease	Aspirin 75mg,Pain Relieavers	2019-12-19 07:35:36	ECG,Blood Test,CT,MRI	rid663	Heart Disease	thrombolytics	Regular Physical Activity - Success 30 Minutes A Day, Avoid Saturated And Trans Fat And Fried Foods, As Well As Snacky-Type Foods.
ehrid790	Hospital1	patient790	doctor1	Diarrhea	Loperamide, Bismuth	2022-05-27 10:51:39	Blood test,stool test,Clostridium difficile toxin test	rid790	infections, travelers' diarrhea	subsalicylate	Avoid Dairy Products, Spicy Foods And All Citrus Foods And Alcohol.
ehrid1481	Hospital2	patient1481	doctor2	Diarrhea	Loperamide, Bismuth	2022-06-19 19:55:00	Blood test,stool test,Clostridium difficile toxin test	rid1481	infections, travelers' diarrhea	subsalicylate	Avoid Dairy Products, Spicy Foods And All Citrus Foods And Alcohol.
ehrid1280	Hospital1	patient1280	doctor1	Diarrhea	Loperamide, Bismuth	2021-03-15 11:51:39	Blood test,stool test,Clostridium difficile toxin test	rid1280	infections, travelers' diarrhea	subsalicylate	Avoid Dairy Products, Spicy Foods And All Citrus Foods And Alcohol.
ehrid1267	Hospital2	patient1267	doctor2	Diarrhea	Loperamide, Bismuth	2019-01-12 07:27:30	Blood test,stool test,Clostridium difficile toxin test	rid1267	infections, travelers' diarrhea	subsalicylate	Avoid Dairy Products, Spicy Foods And All Citrus Foods And Alcohol.
ehrid1910	Hospital1	patient1910	doctor1	Diarrhea	Loperamide, Bismuth	2021-03-02 04:42:50	Blood test,stool test,Clostridium difficile toxin test	rid1910	infections, travelers' diarrhea	subsalicylate	Avoid Dairy Products, Spicy Foods And All Citrus Foods And Alcohol.
ehrid1455	Hospital2	patient1455	doctor2	Alzheimer	Galantamine, rivastigmine	2020-11-13 01:58:23	MRI,CT	rid1455	Alzheimer	donepezil	Follow Mind Diet, Should Have <4 Servings A Week Of Red Meat, Less Than A Tablespoon Of Butter A Day.
ehrid257	Hospital2	patient257	doctor2	Common Cold	acetaminophen (Tylenol)	2021-04-26 16:04:43	No lab tests exist	rid257	Common Cold	acetaminophen	Wash Your Hands Often, Avoid Touching Your Face, Don't Smoke And Maintain A Healthy Life Style.
ehrid2270	Hospital1	patient2270	doctor1	Heart Disease	Aspirin 75mg,Pain Relieavers	2020-08-09 08:42:10	ECG,Blood Test,CT,MRI	rid2110	Heart Disease and Hypertension	thrombolytics	Regular Physical Activity - Success 30 Minutes A Day, Avoid Saturated And Trans Fat And Fried Foods, As Well As Snacky-Type Foods.
ehrid59	Hospital2	patient59	doctor2	Common Cold	acetaminophen (Tylenol)	2021-02-16 03:50:26	No lab tests exist	rid59	Common Cold and Fever	acetaminophen	Wash Your Hands Often, Avoid Touching Your Face, Don't Smoke And Maintain A Healthy Life Style.
ehrid212	Hospital1	patient212	doctor1	Common Cold	acetaminophen (Tylenol)	2020-03-10 11:25:50	No lab tests exist	rid212	Common Cold	acetaminophen	Wash Your Hands Often, Avoid Touching Your Face, Don't Smoke And Maintain A Healthy Life Style.
ehrid1769	Hospital2	patient1769	doctor2	Diarrhea	Loperamide, Bismuth	2022-01-20 10:41:29	Blood test,stool test,Clostridium difficile toxin test	rid1769	infections, travelers' diarrhea	subsalicylate	Avoid Dairy Products, Spicy Foods And All Citrus Foods And Alcohol.
ehrid612	Hospital1	patient612	doctor1	HIV/AIDS	antiretroviral therapy (ART)	2022-07-01 16:54:36	Antigen/antibody tests	rid612	HIV/AIDS	antiretroviral therapy	Do Not Shoot Drugs, Avoid Sex And Do Not Breastfeed And Follow Balanced Diet.
ehrid687	Hospital2	patient687	doctor2	Common Cold	acetaminophen (Tylenol)	2021-09-23 11:20:28	No lab tests exist	rid687	Common Cold	acetaminophen	Wash Your Hands Often, Avoid Touching Your Face, Don't Smoke And Maintain A Healthy Life Style.
ehrid870	Hospital1	patient870	doctor1	Diarrhea	Loperamide, Bismuth	2020-10-10 17:10:31	Blood test,stool test,Clostridium difficile toxin test	rid870	infections, travelers' diarrhea	subsalicylate	Avoid Dairy Products, Spicy Foods And All Citrus Foods And Alcohol.
ehrid227	Hospital2	patient227	doctor2	Common Cold	acetaminophen (Tylenol)	2022-09-08 20:58:49	No lab tests exist	rid227	Common Cold	acetaminophen	Wash Your Hands Often, Avoid Touching Your Face, Don't Smoke And Maintain A Healthy Life Style.
ehrid1906	Hospital1	patient1906	doctor1	Diarrhea	Loperamide, Bismuth	2019-09-10 18:20:28	Blood test,stool test,Clostridium difficile toxin test	rid1906	infections, travelers' diarrhea	subsalicylate	Avoid Dairy Products, Spicy Foods And All Citrus Foods And Alcohol.
ehrid1462	Hospital1	patient1462	doctor1	Heart Disease	Aspirin 75mg,Pain Relieavers	2022-10-13 18:47:10	ECG,Blood Test,CT,MRI	rid1462	Heart Disease	thrombolytics	Regular Physical Activity - Success 30 Minutes A Day, Avoid Saturated And Trans Fat And Fried Foods, As Well As Snacky-Type Foods.
ehrid1045	Hospital2	patient1045	doctor2	Malaria	Chloroquine phosphate	2020-07-23 01:38:26	Malaria Rapid Diagnostic Test	rid1045	Malaria	Artemether/Lumfantrine Treatment	Drink Plenty Of Water, Control Fats Intake, Consume Ripe Papaya, Sweet Lime, Grapes Which Are Rich in Vitamin C
ehrid782	Hospital1	patient782	doctor1	Common Cold	acetaminophen (Tylenol)	2021-10-31 20:31:56	No lab tests exist	rid782	Common Cold	acetaminophen	Wash Your Hands Often, Avoid Touching Your Face, Don't Smoke And Maintain A Healthy Life Style.
ehrid2011	Hospital2	patient2011	doctor2	Diarrhea	Loperamide, Bismuth	2022-07-09 11:30:42	Blood test,stool test,Clostridium difficile toxin test	rid2011	infections, travelers' diarrhea	subsalicylate	Avoid Dairy Products, Spicy Foods And All Citrus Foods And Alcohol.
ehrid677	Hospital2	patient677	doctor2	Common Cold	acetaminophen (Tylenol)	2021-06-11 18:50:02	No lab tests exist	rid677	Common Cold	acetaminophen	Wash Your Hands Often, Avoid Touching Your Face, Don't Smoke And Maintain A Healthy Life Style.
ehrid1415	Hospital2	patient1415	doctor2	Diarrhea	Loperamide, Bismuth	2020-04-20 20:44:24	Blood test,stool test,Clostridium difficile toxin test	rid1415	infections, travelers' diarrhea	subsalicylate	Avoid Dairy Products, Spicy Foods And All Citrus Foods And Alcohol.
ehrid401	Hospital2	patient401	doctor2	Common Cold	acetaminophen (Tylenol)	2019-10-04 15:52:40	No lab tests exist	rid401	Common Cold	acetaminophen	Wash Your Hands Often, Avoid Touching Your Face, Don't Smoke And Maintain A Healthy Life Style.
ehrid274	Hospital1	patient274	doctor1	Common Cold	acetaminophen (Tylenol)	2020-08-10 19:23:10	No lab tests exist	rid274	Common Cold	acetaminophen	Wash Your Hands Often, Avoid Touching Your Face, Don't Smoke And Maintain A Healthy Life Style.
ehrid1866	Hospital1	patient1866	doctor1	Diarrhea	Loperamide, Bismuth	2019-10-08 15:37:21	Blood test,stool test,Clostridium difficile toxin test	rid1866	infections, travelers' diarrhea	subsalicylate	Avoid Dairy Products, Spicy Foods And All Citrus Foods And Alcohol.
ehrid295	Hospital2	patient295	doctor2	Common Cold	acetaminophen (Tylenol)	2019-09-25 21:40:01	No lab tests exist	rid295	Common Cold	acetaminophen	Wash Your Hands Often, Avoid Touching Your Face, Don't Smoke And Maintain A Healthy Life Style.
ehrid495	Hospital2	patient495	doctor2	Asthma	Combination inhalers	2020-06-29 20:41:55	FeNO test, spirometry	rid495	Asthma	Theophylline -2 Nos	Avoid Smoke of Any Type, Control Asthma Triggers.
ehrid2224	Hospital1	patient2224	doctor1	Heart Disease	Aspirin 75mg,Pain Relieavers	2021-07-03 09:15:54	ECG,Blood Test,CT,MRI	rid2266	Heart Disease and Hypertension	thrombolytics	Regular Physical Activity - Success 30 Minutes A Day, Avoid Saturated And Trans Fat And Fried Foods, As Well As Snacky-Type Foods.
ehrid289	Hospital2	patient289	doctor2	Heart Disease	Aspirin 75mg,Pain Relieavers	2022-03-27 14:15:26	ECG,Blood Test,CT,MRI	rid289	Heart Disease	thrombolytics	Regular Physical Activity - Success 30 Minutes A Day, Avoid Saturated And Trans Fat And Fried Foods, As Well As Snacky-Type Foods.
ehrid535	Hospital2	patient535	doctor2	Common Cold	acetaminophen (Tylenol)	2022-09-26 01:02:01	No lab tests exist	rid535	Common Cold	acetaminophen	Wash Your Hands Often, Avoid Touching Your Face, Don't Smoke And Maintain A Healthy Life Style.
ehrid1228	Hospital1	patient1228	doctor1	Diarrhea	Loperamide, Bismuth	2019-10-06 09:27:42	Blood test,stool test,Clostridium difficile toxin test	rid1228	infections, travelers' diarrhea	subsalicylate	Avoid Dairy Products, Spicy Foods And All Citrus Foods And Alcohol.
ehrid1465	Hospital2	patient1465	doctor2	Diarrhea	Loperamide, Bismuth	2021-02-15 18:50:17	Blood test,stool test,Clostridium difficile toxin test	rid1465	infections, travelers' diarrhea	subsalicylate	Avoid Dairy Products, Spicy Foods And All Citrus Foods And Alcohol.
ehrid1916	Hospital1	patient1916	doctor1	Diarrhea	Loperamide, Bismuth	2021-10-08 13:07:02	Blood test,stool test,Clostridium difficile toxin test	rid1916	infections, travelers' diarrhea	subsalicylate	Avoid Dairy Products, Spicy Foods And All Citrus Foods And Alcohol.
ehrid230	Hospital1	patient230	doctor1	Common Cold	acetaminophen (Tylenol)	2021-03-03 12:07:18	No lab tests exist	rid230	Common Cold	acetaminophen	Wash Your Hands Often, Avoid Touching Your Face, Don't Smoke And Maintain A Healthy Life Style.
ehrid2158	Hospital1	patient2158	doctor1	Heart Disease	Aspirin 75mg,Pain Relieavers	2022-04-21 20:23:25	ECG,Blood Test,CT,MRI	rid2241	Heart Disease and Hypertension	thrombolytics	Regular Physical Activity - Success 30 Minutes A Day, Avoid Saturated And Trans Fat And Fried Foods, As Well As Snacky-Type Foods.
ehrid74	Hospital1	patient74	doctor1	Common Cold	acetaminophen (Tylenol)	2022-07-31 00:32:40	No lab tests exist	rid74	Common Cold and Fever	acetaminophen	Wash Your Hands Often, Avoid Touching Your Face, Don't Smoke And Maintain A Healthy Life Style.
ehrid725	Hospital2	patient725	doctor2	Fever	paracetamol 500mg	2020-08-12 08:16:36	Blood Test and Urine Test	rid725	Fever	Acetaminophen injection	Avoid Caffeine And Alcohol, Stay Hydrated, Have Ample Amount Of Rest.
ehrid2031	Hospital2	patient2031	doctor2	Diarrhea	Loperamide, Bismuth	2021-09-18 19:48:39	Blood test,stool test,Clostridium difficile toxin test	rid2031	infections, travelers' diarrhea	subsalicylate	Avoid Dairy Products, Spicy Foods And All Citrus Foods And Alcohol.
ehrid431	Hospital2	patient431	doctor2	Common Cold	acetaminophen (Tylenol)	2019-11-09 14:31:01	No lab tests exist	rid431	Common Cold	acetaminophen	Wash Your Hands Often, Avoid Touching Your Face, Don't Smoke And Maintain A Healthy Life Style.
ehrid645	Hospital2	patient645	doctor2	Alzheimer	Galantamine, rivastigmine	2020-05-16 09:33:02	MRI,CT	rid645	Alzheimer	donepezil	Follow Mind Diet, Should Have <4 Servings A Week Of Red Meat, Less Than A Tablespoon Of Butter A Day.
ehrid1133	Hospital2	patient1133	doctor2	Diabetes	Metformin 250mg -2 Nos	2022-12-03 01:34:57	HbA1C,Fasting Blood Sugar Test	rid1133	Diabetes	Metformin 750mg -2 Nos	Regular Physical Activity - Success 30 Minutes A Day, Avoid Sugar, Ready To Eat Foods.
ehrid1265	Hospital2	patient1265	doctor2	Common Cold	acetaminophen (Tylenol)	2019-06-17 19:25:25	No lab tests exist	rid1265	Common Cold	acetaminophen	Wash Your Hands Often, Avoid Touching Your Face, Don't Smoke And Maintain A Healthy Life Style.
ehrid317	Hospital2	patient317	doctor2	Common Cold	acetaminophen (Tylenol)	2020-07-12 09:37:32	No lab tests exist	rid317	Common Cold	acetaminophen	Wash Your Hands Often, Avoid Touching Your Face, Don't Smoke And Maintain A Healthy Life Style.
ehrid1535	Hospital2	patient1535	doctor2	Diarrhea	Loperamide, Bismuth	2022-02-22 10:59:06	Blood test,stool test,Clostridium difficile toxin test	rid1535	infections, travelers' diarrhea	subsalicylate	Avoid Dairy Products, Spicy Foods And All Citrus Foods And Alcohol.
ehrid635	Hospital2	patient635	doctor2	Common Cold	acetaminophen (Tylenol)	2020-10-04 06:20:33	No lab tests exist	rid635	Common Cold	acetaminophen	Wash Your Hands Often, Avoid Touching Your Face, Don't Smoke And Maintain A Healthy Life Style.
ehrid1225	Hospital2	patient1225	doctor2	Fever	paracetamol 500mg	2019-02-17 15:09:21	Blood Test and Urine Test	rid1225	Fever	Acetaminophen injection	Avoid Caffeine And Alcohol, Stay Hydrated, Have Ample Amount Of Rest.
ehrid1586	Hospital1	patient1586	doctor1	Lung Cancer	Afinitor Disperz	2022-11-01 11:54:19	PET-CT scan,Chest X-ray	rid1586	Lung Cancer	Everolimus	Avoid Smoking Or passive Smoking.
ehrid1547	Hospital2	patient1547	doctor2	Heart Disease	Aspirin 75mg,Pain Relieavers	2020-12-15 14:24:58	ECG,Blood Test,CT,MRI	rid1547	Heart Disease	thrombolytics	Regular Physical Activity - Success 30 Minutes A Day, Avoid Saturated And Trans Fat And Fried Foods, As Well As Snacky-Type Foods.
ehrid65	Hospital2	patient65	doctor2	Lung Cancer	Afinitor Disperz	2019-02-18 17:08:58	PET-CT scan,Chest X-ray	rid65	Lung Cancer	Everolimus	Avoid Smoking Or passive Smoking.
ehrid201	Hospital2	patient201	doctor2	Common Cold	acetaminophen (Tylenol)	2020-05-25 07:23:05	No lab tests exist	rid201	Common Cold	acetaminophen	Wash Your Hands Often, Avoid Touching Your Face, Don't Smoke And Maintain A Healthy Life Style.
ehrid99	Hospital2	patient99	doctor2	Asthma	Combination inhalers	2020-07-08 00:41:03	FeNO test, spirometry	rid99	Asthma	Theophylline -2 Nos	Avoid Smoke of Any Type, Control Asthma Triggers.
ehrid2039	Hospital2	patient2039	doctor2	Diarrhea	Loperamide, Bismuth	2019-02-26 04:07:59	Blood test,stool test,Clostridium difficile toxin test	rid2039	infections, travelers' diarrhea	subsalicylate	Avoid Dairy Products, Spicy Foods And All Citrus Foods And Alcohol.
ehrid903	Hospital2	patient903	doctor2	Stomach Cancer	5-FU (fluorouracil) and leucovorin (folinic acid)	2022-12-05 01:00:07	Upper endoscopy	rid903	Stomach Cancer	chemotherapy	Choose Low-Fat Diary Products, Protien-Rich Foods.
ehrid816	Hospital1	patient816	doctor1	Cirrhosis	ursodiol	2022-10-07 06:40:02	liver biopsy	rid816	Cirrhosis	ursodiol	Eat Foods Like Lean Protein Poultry Or Fish, Strictly Avoid Alcohol.
ehrid1637	Hospital2	patient1637	doctor2	Diarrhea	Loperamide, Bismuth	2019-02-01 06:13:54	Blood test,stool test,Clostridium difficile toxin test	rid1637	infections, travelers' diarrhea	subsalicylate	Avoid Dairy Products, Spicy Foods And All Citrus Foods And Alcohol.
ehrid359	Hospital2	patient359	doctor2	Common Cold	acetaminophen (Tylenol)	2019-06-15 03:00:54	No lab tests exist	rid359	Common Cold	acetaminophen	Wash Your Hands Often, Avoid Touching Your Face, Don't Smoke And Maintain A Healthy Life Style.
ehrid152	Hospital1	patient152	doctor1	Malaria	Chloroquine phosphate	2019-12-11 17:24:03	Malaria Rapid Diagnostic Test	rid152	Malaria	Artemether/Lumfantrine Treatment	Drink Plenty Of Water, Control Fats Intake, Consume Ripe Papaya, Sweet Lime, Grapes Which Are Rich in Vitamin C
ehrid2168	Hospital2	patient2168	doctor1	Heart Disease	Aspirin 75mg,Pain Relieavers	2019-10-10 13:47:58	ECG,Blood Test,CT,MRI	rid2213	Heart Disease and Hypertension	thrombolytics	Regular Physical Activity - Success 30 Minutes A Day, Avoid Saturated And Trans Fat And Fried Foods, As Well As Snacky-Type Foods.
ehrid1376	Hospital1	patient1376	doctor1	Tuberculosis	Rifater >600mg	2021-08-25 22:08:28	Rapid Sputum Test,T-Spot	rid1376	Tuberculosis	Isoniazid INH pills for 6/9 months	Skip Tobacco In All Forms , Don't Consume Alchohol And Limit Caffeinated Drinks.
ehrid1633	Hospital2	patient1633	doctor2	Common Cold	acetaminophen (Tylenol)	2022-05-02 12:57:37	No lab tests exist	rid1633	Common Cold	acetaminophen	Wash Your Hands Often, Avoid Touching Your Face, Don't Smoke And Maintain A Healthy Life Style.
ehrid429	Hospital2	patient429	doctor2	Lung Cancer	Afinitor Disperz	2021-01-21 00:03:36	PET-CT scan,Chest X-ray	rid429	Lung Cancer	Everolimus	Avoid Smoking Or passive Smoking.
ehrid1054	Hospital1	patient1054	doctor1	Heart Disease	Aspirin 75mg,Pain Relieavers	2022-07-28 08:02:35	ECG,Blood Test,CT,MRI	rid1054	Heart Disease	thrombolytics	Regular Physical Activity - Success 30 Minutes A Day, Avoid Saturated And Trans Fat And Fried Foods, As Well As Snacky-Type Foods.
ehrid476	Hospital1	patient476	doctor1	Heart Disease	Aspirin 75mg,Pain Relieavers	2020-04-15 03:25:50	ECG,Blood Test,CT,MRI	rid476	Heart Disease	thrombolytics	Regular Physical Activity - Success 30 Minutes A Day, Avoid Saturated And Trans Fat And Fried Foods, As Well As Snacky-Type Foods.
ehrid1445	Hospital2	patient1445	doctor2	Heart Disease	Aspirin 75mg,Pain Relieavers	2019-02-06 10:56:37	ECG,Blood Test,CT,MRI	rid1445	Heart Disease	thrombolytics	Regular Physical Activity - Success 30 Minutes A Day, Avoid Saturated And Trans Fat And Fried Foods, As Well As Snacky-Type Foods.
ehrid1247	Hospital2	patient1247	doctor2	Diarrhea	Loperamide, Bismuth	2020-05-09 17:07:35	Blood test,stool test,Clostridium difficile toxin test	rid1247	infections, travelers' diarrhea	subsalicylate	Avoid Dairy Products, Spicy Foods And All Citrus Foods And Alcohol.
ehrid1175	Hospital2	patient1175	doctor2	Fever	paracetamol 500mg	2019-12-14 01:30:32	Blood Test and Urine Test	rid1175	Fever	Acetaminophen injection	Avoid Caffeine And Alcohol, Stay Hydrated, Have Ample Amount Of Rest.
ehrid1214	Hospital1	patient1214	doctor1	Diarrhea	Loperamide, Bismuth	2021-10-14 13:48:07	Blood test,stool test,Clostridium difficile toxin test	rid1214	infections, travelers' diarrhea	subsalicylate	Avoid Dairy Products, Spicy Foods And All Citrus Foods And Alcohol.
ehrid140	Hospital1	patient140	doctor1	Diarrhea	Loperamide, Bismuth	2022-11-16 01:43:42	Blood test,stool test,Clostridium difficile toxin test	rid140	infections, travelers' diarrhea	subsalicylate	Avoid Dairy Products, Spicy Foods And All Citrus Foods And Alcohol.
ehrid2247	Hospital2	patient2247	doctor2	Heart Disease	Aspirin 75mg,Pain Relieavers	2021-10-01 17:59:28	ECG,Blood Test,CT,MRI	rid2153	Heart Disease and Hypertension	thrombolytics	Regular Physical Activity - Success 30 Minutes A Day, Avoid Saturated And Trans Fat And Fried Foods, As Well As Snacky-Type Foods.
ehrid14	Hospital1	patient14	doctor1	Stroke	Aspirin 75mg,tPA	2022-04-26 01:03:34	CT ,MRI,Echocardiogram	rid14	Stroke	clopidogrel,dipyridamole	Avoid Sugar, Salt, Highly Processed Foods, Saturated And Trans Fats And Fried Foods.
ehrid1435	Hospital2	patient1435	doctor2	Diarrhea	Loperamide, Bismuth	2019-09-26 07:15:09	Blood test,stool test,Clostridium difficile toxin test	rid1435	infections, travelers' diarrhea	subsalicylate	Avoid Dairy Products, Spicy Foods And All Citrus Foods And Alcohol.
ehrid855	Hospital2	patient855	doctor2	Asthma	Combination inhalers	2021-01-09 01:50:12	FeNO test, spirometry	rid855	Asthma	Theophylline -2 Nos	Avoid Smoke of Any Type, Control Asthma Triggers.
ehrid2046	Hospital1	patient2046	doctor1	Diabetes	Metformin 250mg -2 Nos	2020-12-19 22:22:33	HbA1C,Fasting Blood Sugar Test	rid2046	Diabetes	Metformin 750mg -2 Nos	Regular Physical Activity - Success 30 Minutes A Day, Avoid Sugar, Ready To Eat Foods.
ehrid1047	Hospital2	patient1047	doctor2	Diarrhea	Loperamide, Bismuth	2020-11-02 05:54:09	Blood test,stool test,Clostridium difficile toxin test	rid1047	infections, travelers' diarrhea	subsalicylate	Avoid Dairy Products, Spicy Foods And All Citrus Foods And Alcohol.
ehrid1537	Hospital2	patient1537	doctor2	Diarrhea	Loperamide, Bismuth	2020-08-02 13:48:47	Blood test,stool test,Clostridium difficile toxin test	rid1537	infections, travelers' diarrhea	subsalicylate	Avoid Dairy Products, Spicy Foods And All Citrus Foods And Alcohol.
ehrid1188	Hospital1	patient1188	doctor1	HIV/AIDS	antiretroviral therapy (ART)	2021-01-12 07:21:09	Antigen/antibody tests	rid1188	HIV/AIDS	antiretroviral therapy	Do Not Shoot Drugs, Avoid Sex And Do Not Breastfeed And Follow Balanced Diet.
ehrid795	Hospital2	patient795	doctor2	Alzheimer	Galantamine, rivastigmine	2019-03-18 12:58:12	MRI,CT	rid795	Alzheimer	donepezil	Follow Mind Diet, Should Have <4 Servings A Week Of Red Meat, Less Than A Tablespoon Of Butter A Day.
ehrid1671	Hospital2	patient1671	doctor2	Diarrhea	Loperamide, Bismuth	2019-06-02 08:47:02	Blood test,stool test,Clostridium difficile toxin test	rid1671	infections, travelers' diarrhea	subsalicylate	Avoid Dairy Products, Spicy Foods And All Citrus Foods And Alcohol.
ehrid75	Hospital2	patient75	doctor2	Fever	paracetamol 500mg	2020-10-16 12:06:21	Blood Test and Urine Test	rid75	Fever	Acetaminophen injection	Avoid Caffeine And Alcohol, Stay Hydrated, Have Ample Amount Of Rest.
ehrid1797	Hospital2	patient1797	doctor2	Diarrhea	Loperamide, Bismuth	2021-12-30 16:45:49	Blood test,stool test,Clostridium difficile toxin test	rid1797	infections, travelers' diarrhea	subsalicylate	Avoid Dairy Products, Spicy Foods And All Citrus Foods And Alcohol.
ehrid754	Hospital1	patient754	doctor1	Lung Cancer	Afinitor Disperz	2020-10-08 04:35:58	PET-CT scan,Chest X-ray	rid754	Lung Cancer	Everolimus	Avoid Smoking Or passive Smoking.
ehrid430	Hospital1	patient430	doctor1	Diarrhea	Loperamide, Bismuth	2022-08-18 09:29:51	Blood test,stool test,Clostridium difficile toxin test	rid430	infections, travelers' diarrhea	subsalicylate	Avoid Dairy Products, Spicy Foods And All Citrus Foods And Alcohol.
ehrid449	Hospital2	patient449	doctor2	Common Cold	acetaminophen (Tylenol)	2021-11-28 16:33:23	No lab tests exist	rid449	Common Cold	acetaminophen	Wash Your Hands Often, Avoid Touching Your Face, Don't Smoke And Maintain A Healthy Life Style.
ehrid162	Hospital1	patient162	doctor1	HIV/AIDS	antiretroviral therapy (ART)	2022-01-03 15:05:09	Antigen/antibody tests	rid162	HIV/AIDS	antiretroviral therapy	Do Not Shoot Drugs, Avoid Sex And Do Not Breastfeed And Follow Balanced Diet.
ehrid901	Hospital2	patient901	doctor2	Heart Disease	Aspirin 75mg,Pain Relieavers	2019-06-27 18:49:11	ECG,Blood Test,CT,MRI	rid901	Heart Disease	thrombolytics	Regular Physical Activity - Success 30 Minutes A Day, Avoid Saturated And Trans Fat And Fried Foods, As Well As Snacky-Type Foods.
ehrid1525	Hospital2	patient1525	doctor2	Fever	paracetamol 500mg	2019-07-21 14:20:33	Blood Test and Urine Test	rid1525	Fever	Acetaminophen injection	Avoid Caffeine And Alcohol, Stay Hydrated, Have Ample Amount Of Rest.
ehrid1710	Hospital1	patient1710	doctor1	HIV/AIDS	antiretroviral therapy (ART)	2019-12-20 20:43:43	Antigen/antibody tests	rid1710	HIV/AIDS	antiretroviral therapy	Do Not Shoot Drugs, Avoid Sex And Do Not Breastfeed And Follow Balanced Diet.
ehrid545	Hospital2	patient545	doctor2	Common Cold	acetaminophen (Tylenol)	2022-07-05 20:47:56	No lab tests exist	rid545	Common Cold	acetaminophen	Wash Your Hands Often, Avoid Touching Your Face, Don't Smoke And Maintain A Healthy Life Style.
ehrid2094	Hospital1	patient2094	doctor1	Diarrhea	Loperamide, Bismuth	2022-05-26 19:33:01	Blood test,stool test,Clostridium difficile toxin test	rid2094	infections, travelers' diarrhea	subsalicylate	Avoid Dairy Products, Spicy Foods And All Citrus Foods And Alcohol.
ehrid1881	Hospital2	patient1881	doctor2	Asthma	Combination inhalers	2019-09-25 02:31:12	FeNO test, spirometry	rid1881	Asthma	Theophylline -2 Nos	Avoid Smoke of Any Type, Control Asthma Triggers.
ehrid175	Hospital2	patient175	doctor2	Fever	paracetamol 500mg	2021-02-28 16:18:46	Blood Test and Urine Test	rid175	Fever	Acetaminophen injection	Avoid Caffeine And Alcohol, Stay Hydrated, Have Ample Amount Of Rest.
ehrid1604	Hospital1	patient1604	doctor1	Diarrhea	Loperamide, Bismuth	2020-07-21 19:04:37	Blood test,stool test,Clostridium difficile toxin test	rid1604	infections, travelers' diarrhea	subsalicylate	Avoid Dairy Products, Spicy Foods And All Citrus Foods And Alcohol.
ehrid1718	Hospital1	patient1718	doctor1	Diarrhea	Loperamide, Bismuth	2021-09-30 19:17:50	Blood test,stool test,Clostridium difficile toxin test	rid1718	infections, travelers' diarrhea	subsalicylate	Avoid Dairy Products, Spicy Foods And All Citrus Foods And Alcohol.
ehrid445	Hospital2	patient445	doctor2	Common Cold	acetaminophen (Tylenol)	2020-06-03 17:49:25	No lab tests exist	rid445	Common Cold	acetaminophen	Wash Your Hands Often, Avoid Touching Your Face, Don't Smoke And Maintain A Healthy Life Style.
ehrid679	Hospital2	patient679	doctor2	Common Cold	acetaminophen (Tylenol)	2020-10-22 00:48:35	No lab tests exist	rid679	Common Cold	acetaminophen	Wash Your Hands Often, Avoid Touching Your Face, Don't Smoke And Maintain A Healthy Life Style.
ehrid882	Hospital1	patient882	doctor1	Stomach Cancer	5-FU (fluorouracil) and leucovorin (folinic acid)	2019-09-22 07:39:17	Upper endoscopy	rid882	Stomach Cancer	chemotherapy	Choose Low-Fat Diary Products, Protien-Rich Foods.
ehrid1703	Hospital2	patient1703	doctor2	Lung Cancer	Afinitor Disperz	2019-05-26 07:31:51	PET-CT scan,Chest X-ray	rid1703	Lung Cancer	Everolimus	Avoid Smoking Or passive Smoking.
ehrid1903	Hospital2	patient1903	doctor2	Diabetes	Metformin 250mg -2 Nos	2021-03-31 07:56:14	HbA1C,Fasting Blood Sugar Test	rid1903	Diabetes	Metformin 750mg -2 Nos	Regular Physical Activity - Success 30 Minutes A Day, Avoid Sugar, Ready To Eat Foods.
ehrid584	Hospital1	patient584	doctor1	Common Cold	acetaminophen (Tylenol)	2022-07-19 17:26:55	No lab tests exist	rid584	Common Cold	acetaminophen	Wash Your Hands Often, Avoid Touching Your Face, Don't Smoke And Maintain A Healthy Life Style.
ehrid40	Hospital1	patient40	doctor1	Diarrhea	Loperamide, Bismuth	2022-12-01 15:47:33	Blood test,stool test,Clostridium difficile toxin test	rid40	infections, travelers' diarrhea	subsalicylate	Avoid Dairy Products, Spicy Foods And All Citrus Foods And Alcohol.
ehrid1362	Hospital1	patient1362	doctor1	Diarrhea	Loperamide, Bismuth	2021-11-13 03:25:57	Blood test,stool test,Clostridium difficile toxin test	rid1362	infections, travelers' diarrhea	subsalicylate	Avoid Dairy Products, Spicy Foods And All Citrus Foods And Alcohol.
ehrid574	Hospital1	patient574	doctor1	Stroke	Aspirin 75mg,tPA	2019-11-25 13:37:14	CT ,MRI,Echocardiogram	rid574	Stroke	clopidogrel,dipyridamole	Avoid Sugar, Salt, Highly Processed Foods, Saturated And Trans Fats And Fried Foods.
ehrid1765	Hospital2	patient1765	doctor2	Diarrhea	Loperamide, Bismuth	2021-02-01 12:25:23	Blood test,stool test,Clostridium difficile toxin test	rid1765	infections, travelers' diarrhea	subsalicylate	Avoid Dairy Products, Spicy Foods And All Citrus Foods And Alcohol.
ehrid1552	Hospital1	patient1552	doctor1	Tuberculosis	Rifater >600mg	2019-10-24 10:03:01	Rapid Sputum Test,T-Spot	rid1552	Tuberculosis	Isoniazid INH pills for 6/9 months	Skip Tobacco In All Forms , Don't Consume Alchohol And Limit Caffeinated Drinks.
ehrid553	Hospital2	patient553	doctor2	Common Cold	acetaminophen (Tylenol)	2019-09-25 02:10:18	No lab tests exist	rid553	Common Cold	acetaminophen	Wash Your Hands Often, Avoid Touching Your Face, Don't Smoke And Maintain A Healthy Life Style.
ehrid435	Hospital2	patient435	doctor2	Alzheimer	Galantamine, rivastigmine	2021-12-18 07:35:40	MRI,CT	rid435	Alzheimer	donepezil	Follow Mind Diet, Should Have <4 Servings A Week Of Red Meat, Less Than A Tablespoon Of Butter A Day.
ehrid1548	Hospital1	patient1548	doctor1	HIV/AIDS	antiretroviral therapy (ART)	2022-08-24 03:48:35	Antigen/antibody tests	rid1548	HIV/AIDS	antiretroviral therapy	Do Not Shoot Drugs, Avoid Sex And Do Not Breastfeed And Follow Balanced Diet.
ehrid142	Hospital1	patient142	doctor1	Common Cold	acetaminophen (Tylenol)	2022-03-26 22:30:15	No lab tests exist	rid142	Common Cold	acetaminophen	Wash Your Hands Often, Avoid Touching Your Face, Don't Smoke And Maintain A Healthy Life Style.
ehrid1486	Hospital1	patient1486	doctor1	Diarrhea	Loperamide, Bismuth	2022-04-15 21:08:23	Blood test,stool test,Clostridium difficile toxin test	rid1486	infections, travelers' diarrhea	subsalicylate	Avoid Dairy Products, Spicy Foods And All Citrus Foods And Alcohol.
ehrid1621	Hospital2	patient1621	doctor2	Diarrhea	Loperamide, Bismuth	2020-09-19 16:20:23	Blood test,stool test,Clostridium difficile toxin test	rid1621	infections, travelers' diarrhea	subsalicylate	Avoid Dairy Products, Spicy Foods And All Citrus Foods And Alcohol.
ehrid2242	Hospital1	patient2242	doctor1	Heart Disease	Aspirin 75mg,Pain Relieavers	2019-12-11 12:36:35	ECG,Blood Test,CT,MRI	rid2177	Heart Disease and Hypertension	thrombolytics	Regular Physical Activity - Success 30 Minutes A Day, Avoid Saturated And Trans Fat And Fried Foods, As Well As Snacky-Type Foods.
ehrid164	Hospital1	patient164	doctor1	Common Cold	acetaminophen (Tylenol)	2020-06-17 23:18:19	No lab tests exist	rid164	Common Cold	acetaminophen	Wash Your Hands Often, Avoid Touching Your Face, Don't Smoke And Maintain A Healthy Life Style.
ehrid944	Hospital1	patient944	doctor1	Tuberculosis	Rifater >600mg	2021-02-02 15:16:21	Rapid Sputum Test,T-Spot	rid944	Tuberculosis	Isoniazid INH pills for 6/9 months	Skip Tobacco In All Forms , Don't Consume Alchohol And Limit Caffeinated Drinks.
ehrid1216	Hospital1	patient1216	doctor1	Malaria	Chloroquine phosphate	2019-01-03 12:45:52	Malaria Rapid Diagnostic Test	rid1216	Malaria	Artemether/Lumfantrine Treatment	Drink Plenty Of Water, Control Fats Intake, Consume Ripe Papaya, Sweet Lime, Grapes Which Are Rich in Vitamin C
ehrid1312	Hospital1	patient1312	doctor1	Tuberculosis	Rifater >600mg	2021-12-31 17:19:37	Rapid Sputum Test,T-Spot	rid1312	Tuberculosis	Isoniazid INH pills for 6/9 months	Skip Tobacco In All Forms , Don't Consume Alchohol And Limit Caffeinated Drinks.
ehrid918	Hospital1	patient918	doctor1	HIV/AIDS	antiretroviral therapy (ART)	2020-10-09 10:57:18	Antigen/antibody tests	rid918	HIV/AIDS	antiretroviral therapy	Do Not Shoot Drugs, Avoid Sex And Do Not Breastfeed And Follow Balanced Diet.
ehrid1030	Hospital1	patient1030	doctor1	Diarrhea	Loperamide, Bismuth	2021-07-14 13:25:32	Blood test,stool test,Clostridium difficile toxin test	rid1030	infections, travelers' diarrhea	subsalicylate	Avoid Dairy Products, Spicy Foods And All Citrus Foods And Alcohol.
ehrid2263	Hospital2	patient2263	doctor2	Heart Disease	Aspirin 75mg,Pain Relieavers	2021-03-08 23:03:42	ECG,Blood Test,CT,MRI	rid2174	Heart Disease and Hypertension	thrombolytics	Regular Physical Activity - Success 30 Minutes A Day, Avoid Saturated And Trans Fat And Fried Foods, As Well As Snacky-Type Foods.
ehrid805	Hospital2	patient805	doctor2	Common Cold	acetaminophen (Tylenol)	2019-06-28 17:55:58	No lab tests exist	rid805	Common Cold	acetaminophen	Wash Your Hands Often, Avoid Touching Your Face, Don't Smoke And Maintain A Healthy Life Style.
ehrid1167	Hospital2	patient1167	doctor2	Diarrhea	Loperamide, Bismuth	2021-09-10 07:32:37	Blood test,stool test,Clostridium difficile toxin test	rid1167	infections, travelers' diarrhea	subsalicylate	Avoid Dairy Products, Spicy Foods And All Citrus Foods And Alcohol.
ehrid465	Hospital2	patient465	doctor2	Alzheimer	Galantamine, rivastigmine	2022-04-19 07:29:22	MRI,CT	rid465	Alzheimer	donepezil	Follow Mind Diet, Should Have <4 Servings A Week Of Red Meat, Less Than A Tablespoon Of Butter A Day.
ehrid837	Hospital2	patient837	doctor2	Asthma	Combination inhalers	2021-05-13 21:49:10	FeNO test, spirometry	rid837	Asthma	Theophylline -2 Nos	Avoid Smoke of Any Type, Control Asthma Triggers.
ehrid2108	Hospital2	patient2108	doctor1	Heart Disease	Aspirin 75mg,Pain Relieavers	2019-06-22 12:02:18	ECG,Blood Test,CT,MRI	rid2264	Heart Disease and Hypertension	thrombolytics	Regular Physical Activity - Success 30 Minutes A Day, Avoid Saturated And Trans Fat And Fried Foods, As Well As Snacky-Type Foods.
ehrid1125	Hospital2	patient1125	doctor2	Fever	paracetamol 500mg	2022-11-25 22:07:46	Blood Test and Urine Test	rid1125	Fever	Acetaminophen injection	Avoid Caffeine And Alcohol, Stay Hydrated, Have Ample Amount Of Rest.
ehrid1285	Hospital2	patient1285	doctor2	Diarrhea	Loperamide, Bismuth	2020-06-22 13:37:41	Blood test,stool test,Clostridium difficile toxin test	rid1285	infections, travelers' diarrhea	subsalicylate	Avoid Dairy Products, Spicy Foods And All Citrus Foods And Alcohol.
ehrid557	Hospital2	patient557	doctor2	Common Cold	acetaminophen (Tylenol)	2021-05-03 22:38:09	No lab tests exist	rid557	Common Cold	acetaminophen	Wash Your Hands Often, Avoid Touching Your Face, Don't Smoke And Maintain A Healthy Life Style.
ehrid1523	Hospital2	patient1523	doctor2	Diarrhea	Loperamide, Bismuth	2020-09-12 03:14:17	Blood test,stool test,Clostridium difficile toxin test	rid1523	infections, travelers' diarrhea	subsalicylate	Avoid Dairy Products, Spicy Foods And All Citrus Foods And Alcohol.
ehrid733	Hospital2	patient733	doctor2	Common Cold	acetaminophen (Tylenol)	2021-09-25 11:01:59	No lab tests exist	rid733	Common Cold	acetaminophen	Wash Your Hands Often, Avoid Touching Your Face, Don't Smoke And Maintain A Healthy Life Style.
ehrid1857	Hospital2	patient1857	doctor2	Diarrhea	Loperamide, Bismuth	2019-06-23 10:27:09	Blood test,stool test,Clostridium difficile toxin test	rid1857	infections, travelers' diarrhea	subsalicylate	Avoid Dairy Products, Spicy Foods And All Citrus Foods And Alcohol.
ehrid1763	Hospital2	patient1763	doctor2	Diarrhea	Loperamide, Bismuth	2019-04-20 16:39:47	Blood test,stool test,Clostridium difficile toxin test	rid1763	infections, travelers' diarrhea	subsalicylate	Avoid Dairy Products, Spicy Foods And All Citrus Foods And Alcohol.
ehrid2259	Hospital2	patient2259	doctor2	Heart Disease	Aspirin 75mg,Pain Relieavers	2020-10-14 00:30:16	ECG,Blood Test,CT,MRI	rid2156	Heart Disease and Hypertension	thrombolytics	Regular Physical Activity - Success 30 Minutes A Day, Avoid Saturated And Trans Fat And Fried Foods, As Well As Snacky-Type Foods.
ehrid649	Hospital2	patient649	doctor2	Diabetes	Metformin 250mg -2 Nos	2022-09-21 02:45:53	HbA1C,Fasting Blood Sugar Test	rid649	Diabetes	Metformin 750mg -2 Nos	Regular Physical Activity - Success 30 Minutes A Day, Avoid Sugar, Ready To Eat Foods.
ehrid1672	Hospital1	patient1672	doctor1	Malaria	Chloroquine phosphate	2019-02-09 07:51:58	Malaria Rapid Diagnostic Test	rid1672	Malaria	Artemether/Lumfantrine Treatment	Drink Plenty Of Water, Control Fats Intake, Consume Ripe Papaya, Sweet Lime, Grapes Which Are Rich in Vitamin C
ehrid1236	Hospital1	patient1236	doctor1	Cirrhosis	ursodiol	2019-02-05 03:19:13	liver biopsy	rid1236	Cirrhosis	ursodiol	Eat Foods Like Lean Protein Poultry Or Fish, Strictly Avoid Alcohol.
ehrid1249	Hospital2	patient1249	doctor2	Diarrhea	Loperamide, Bismuth	2021-11-25 06:07:23	Blood test,stool test,Clostridium difficile toxin test	rid1249	infections, travelers' diarrhea	subsalicylate	Avoid Dairy Products, Spicy Foods And All Citrus Foods And Alcohol.
ehrid714	Hospital1	patient714	doctor1	Stomach Cancer	5-FU (fluorouracil) and leucovorin (folinic acid)	2020-08-13 21:25:47	Upper endoscopy	rid714	Stomach Cancer	chemotherapy	Choose Low-Fat Diary Products, Protien-Rich Foods.
ehrid1253	Hospital2	patient1253	doctor2	Diarrhea	Loperamide, Bismuth	2022-03-20 20:07:00	Blood test,stool test,Clostridium difficile toxin test	rid1253	infections, travelers' diarrhea	subsalicylate	Avoid Dairy Products, Spicy Foods And All Citrus Foods And Alcohol.
ehrid1134	Hospital1	patient1134	doctor1	Stomach Cancer	5-FU (fluorouracil) and leucovorin (folinic acid)	2022-12-09 21:24:15	Upper endoscopy	rid1134	Stomach Cancer	chemotherapy	Choose Low-Fat Diary Products, Protien-Rich Foods.
ehrid1342	Hospital1	patient1342	doctor1	Diabetes	Metformin 250mg -2 Nos	2022-09-06 22:53:20	HbA1C,Fasting Blood Sugar Test	rid1342	Diabetes	Metformin 750mg -2 Nos	Regular Physical Activity - Success 30 Minutes A Day, Avoid Sugar, Ready To Eat Foods.
ehrid1324	Hospital1	patient1324	doctor1	Diarrhea	Loperamide, Bismuth	2020-04-11 23:49:46	Blood test,stool test,Clostridium difficile toxin test	rid1324	infections, travelers' diarrhea	subsalicylate	Avoid Dairy Products, Spicy Foods And All Citrus Foods And Alcohol.
ehrid917	Hospital2	patient917	doctor2	Common Cold	acetaminophen (Tylenol)	2020-07-22 09:55:16	No lab tests exist	rid917	Common Cold	acetaminophen	Wash Your Hands Often, Avoid Touching Your Face, Don't Smoke And Maintain A Healthy Life Style.
ehrid1194	Hospital1	patient1194	doctor1	Diarrhea	Loperamide, Bismuth	2022-11-06 17:25:40	Blood test,stool test,Clostridium difficile toxin test	rid1194	infections, travelers' diarrhea	subsalicylate	Avoid Dairy Products, Spicy Foods And All Citrus Foods And Alcohol.
ehrid1992	Hospital1	patient1992	doctor1	Cirrhosis	ursodiol	2021-12-07 23:07:54	liver biopsy	rid1992	Cirrhosis	ursodiol	Eat Foods Like Lean Protein Poultry Or Fish, Strictly Avoid Alcohol.
ehrid650	Hospital1	patient650	doctor1	Fever	paracetamol 500mg	2020-04-20 16:38:40	Blood Test and Urine Test	rid650	Fever	Acetaminophen injection	Avoid Caffeine And Alcohol, Stay Hydrated, Have Ample Amount Of Rest.
ehrid1894	Hospital1	patient1894	doctor1	Diarrhea	Loperamide, Bismuth	2021-07-24 09:50:00	Blood test,stool test,Clostridium difficile toxin test	rid1894	infections, travelers' diarrhea	subsalicylate	Avoid Dairy Products, Spicy Foods And All Citrus Foods And Alcohol.
ehrid1892	Hospital1	patient1892	doctor1	Diabetes	Metformin 250mg -2 Nos	2022-10-21 20:20:00	HbA1C,Fasting Blood Sugar Test	rid1892	Diabetes	Metformin 750mg -2 Nos	Regular Physical Activity - Success 30 Minutes A Day, Avoid Sugar, Ready To Eat Foods.
ehrid1877	Hospital2	patient1877	doctor2	Diarrhea	Loperamide, Bismuth	2019-04-20 13:22:42	Blood test,stool test,Clostridium difficile toxin test	rid1877	infections, travelers' diarrhea	subsalicylate	Avoid Dairy Products, Spicy Foods And All Citrus Foods And Alcohol.
ehrid1816	Hospital1	patient1816	doctor1	Diarrhea	Loperamide, Bismuth	2019-12-02 08:14:53	Blood test,stool test,Clostridium difficile toxin test	rid1816	infections, travelers' diarrhea	subsalicylate	Avoid Dairy Products, Spicy Foods And All Citrus Foods And Alcohol.
ehrid1647	Hospital2	patient1647	doctor2	Asthma	Combination inhalers	2021-11-03 02:19:18	FeNO test, spirometry	rid1647	Asthma	Theophylline -2 Nos	Avoid Smoke of Any Type, Control Asthma Triggers.
ehrid623	Hospital2	patient623	doctor2	Common Cold	acetaminophen (Tylenol)	2021-07-02 04:54:05	No lab tests exist	rid623	Common Cold	acetaminophen	Wash Your Hands Often, Avoid Touching Your Face, Don't Smoke And Maintain A Healthy Life Style.
ehrid2246	Hospital1	patient2246	doctor1	Heart Disease	Aspirin 75mg,Pain Relieavers	2019-12-29 20:43:59	ECG,Blood Test,CT,MRI	rid2194	Heart Disease and Hypertension	thrombolytics	Regular Physical Activity - Success 30 Minutes A Day, Avoid Saturated And Trans Fat And Fried Foods, As Well As Snacky-Type Foods.
ehrid101	Hospital2	patient101	doctor2	Common Cold	acetaminophen (Tylenol)	2020-10-05 12:59:40	No lab tests exist	rid101	Common Cold	acetaminophen	Wash Your Hands Often, Avoid Touching Your Face, Don't Smoke And Maintain A Healthy Life Style.
ehrid1715	Hospital2	patient1715	doctor2	Diarrhea	Loperamide, Bismuth	2022-04-12 09:11:00	Blood test,stool test,Clostridium difficile toxin test	rid1715	infections, travelers' diarrhea	subsalicylate	Avoid Dairy Products, Spicy Foods And All Citrus Foods And Alcohol.
ehrid1387	Hospital2	patient1387	doctor2	Malaria	Chloroquine phosphate	2021-09-15 08:55:43	Malaria Rapid Diagnostic Test	rid1387	Malaria	Artemether/Lumfantrine Treatment	Drink Plenty Of Water, Control Fats Intake, Consume Ripe Papaya, Sweet Lime, Grapes Which Are Rich in Vitamin C
ehrid608	Hospital1	patient608	doctor1	Malaria	Chloroquine phosphate	2021-11-27 22:25:51	Malaria Rapid Diagnostic Test	rid608	Malaria	Artemether/Lumfantrine Treatment	Drink Plenty Of Water, Control Fats Intake, Consume Ripe Papaya, Sweet Lime, Grapes Which Are Rich in Vitamin C
ehrid1936	Hospital1	patient1936	doctor1	Tuberculosis	Rifater >600mg	2020-11-21 04:36:53	Rapid Sputum Test,T-Spot	rid1936	Tuberculosis	Isoniazid INH pills for 6/9 months	Skip Tobacco In All Forms , Don't Consume Alchohol And Limit Caffeinated Drinks.
ehrid935	Hospital2	patient935	doctor2	Heart Disease	Aspirin 75mg,Pain Relieavers	2020-04-12 23:08:06	ECG,Blood Test,CT,MRI	rid935	Heart Disease	thrombolytics	Regular Physical Activity - Success 30 Minutes A Day, Avoid Saturated And Trans Fat And Fried Foods, As Well As Snacky-Type Foods.
ehrid1239	Hospital2	patient1239	doctor2	Stomach Cancer	5-FU (fluorouracil) and leucovorin (folinic acid)	2021-04-11 06:16:19	Upper endoscopy	rid1239	Stomach Cancer	chemotherapy	Choose Low-Fat Diary Products, Protien-Rich Foods.
ehrid1982	Hospital1	patient1982	doctor1	Diarrhea	Loperamide, Bismuth	2019-09-26 12:36:32	Blood test,stool test,Clostridium difficile toxin test	rid1982	infections, travelers' diarrhea	subsalicylate	Avoid Dairy Products, Spicy Foods And All Citrus Foods And Alcohol.
ehrid878	Hospital1	patient878	doctor1	Common Cold	acetaminophen (Tylenol)	2022-08-03 20:57:39	No lab tests exist	rid878	Common Cold	acetaminophen	Wash Your Hands Often, Avoid Touching Your Face, Don't Smoke And Maintain A Healthy Life Style.
ehrid1215	Hospital2	patient1215	doctor2	Asthma	Combination inhalers	2022-02-25 18:49:32	FeNO test, spirometry	rid1215	Asthma	Theophylline -2 Nos	Avoid Smoke of Any Type, Control Asthma Triggers.
ehrid1229	Hospital2	patient1229	doctor2	Diarrhea	Loperamide, Bismuth	2020-11-05 14:56:17	Blood test,stool test,Clostridium difficile toxin test	rid1229	infections, travelers' diarrhea	subsalicylate	Avoid Dairy Products, Spicy Foods And All Citrus Foods And Alcohol.
ehrid1747	Hospital2	patient1747	doctor2	Diarrhea	Loperamide, Bismuth	2019-03-02 15:07:38	Blood test,stool test,Clostridium difficile toxin test	rid1747	infections, travelers' diarrhea	subsalicylate	Avoid Dairy Products, Spicy Foods And All Citrus Foods And Alcohol.
ehrid1650	Hospital1	patient1650	doctor1	Fever	paracetamol 500mg	2021-08-16 15:22:27	Blood Test and Urine Test	rid1650	Fever	Acetaminophen injection	Avoid Caffeine And Alcohol, Stay Hydrated, Have Ample Amount Of Rest.
ehrid1777	Hospital2	patient1777	doctor2	Diarrhea	Loperamide, Bismuth	2022-02-06 05:52:53	Blood test,stool test,Clostridium difficile toxin test	rid1777	infections, travelers' diarrhea	subsalicylate	Avoid Dairy Products, Spicy Foods And All Citrus Foods And Alcohol.
ehrid959	Hospital2	patient959	doctor2	Common Cold	acetaminophen (Tylenol)	2020-04-18 14:09:51	No lab tests exist	rid959	Common Cold	acetaminophen	Wash Your Hands Often, Avoid Touching Your Face, Don't Smoke And Maintain A Healthy Life Style.
ehrid260	Hospital1	patient260	doctor1	Diarrhea	Loperamide, Bismuth	2022-02-07 09:27:54	Blood test,stool test,Clostridium difficile toxin test	rid260	infections, travelers' diarrhea	subsalicylate	Avoid Dairy Products, Spicy Foods And All Citrus Foods And Alcohol.
ehrid2134	Hospital1	patient2134	doctor1	Heart Disease	Aspirin 75mg,Pain Relieavers	2021-01-10 22:03:24	ECG,Blood Test,CT,MRI	rid2253	Heart Disease and Hypertension	thrombolytics	Regular Physical Activity - Success 30 Minutes A Day, Avoid Saturated And Trans Fat And Fried Foods, As Well As Snacky-Type Foods.
ehrid858	Hospital1	patient858	doctor1	Lung Cancer	Afinitor Disperz	2022-09-27 05:07:55	PET-CT scan,Chest X-ray	rid858	Lung Cancer	Everolimus	Avoid Smoking Or passive Smoking.
ehrid458	Hospital1	patient458	doctor1	Common Cold	acetaminophen (Tylenol)	2021-11-14 15:27:03	No lab tests exist	rid458	Common Cold	acetaminophen	Wash Your Hands Often, Avoid Touching Your Face, Don't Smoke And Maintain A Healthy Life Style.
ehrid1128	Hospital1	patient1128	doctor1	Cirrhosis	ursodiol	2022-10-01 11:31:03	liver biopsy	rid1128	Cirrhosis	ursodiol	Eat Foods Like Lean Protein Poultry Or Fish, Strictly Avoid Alcohol.
ehrid54	Hospital1	patient54	doctor1	HIV/AIDS	antiretroviral therapy (ART)	2021-12-22 11:28:52	Antigen/antibody tests	rid54	HIV/AIDS	antiretroviral therapy	Do Not Shoot Drugs, Avoid Sex And Do Not Breastfeed And Follow Balanced Diet.
ehrid35	Hospital2	patient35	doctor2	Common Cold	acetaminophen (Tylenol)	2021-05-04 03:06:13	No lab tests exist	rid35	Common Cold and Fever	acetaminophen	Wash Your Hands Often, Avoid Touching Your Face, Don't Smoke And Maintain A Healthy Life Style.
ehrid376	Hospital1	patient376	doctor1	Common Cold	acetaminophen (Tylenol)	2019-05-15 03:25:48	No lab tests exist	rid376	Common Cold	acetaminophen	Wash Your Hands Often, Avoid Touching Your Face, Don't Smoke And Maintain A Healthy Life Style.
ehrid2002	Hospital1	patient2002	doctor1	Lung Cancer	Afinitor Disperz	2020-03-23 11:29:11	PET-CT scan,Chest X-ray	rid2002	Lung Cancer	Everolimus	Avoid Smoking Or passive Smoking.
ehrid1358	Hospital1	patient1358	doctor1	Stroke	Aspirin 75mg,tPA	2021-01-25 18:25:20	CT ,MRI,Echocardiogram	rid1358	Stroke	clopidogrel,dipyridamole	Avoid Sugar, Salt, Highly Processed Foods, Saturated And Trans Fats And Fried Foods.
ehrid459	Hospital2	patient459	doctor2	Asthma	Combination inhalers	2019-01-03 17:31:19	FeNO test, spirometry	rid459	Asthma	Theophylline -2 Nos	Avoid Smoke of Any Type, Control Asthma Triggers.
ehrid432	Hospital1	patient432	doctor1	HIV/AIDS	antiretroviral therapy (ART)	2021-06-19 20:11:39	Antigen/antibody tests	rid432	HIV/AIDS	antiretroviral therapy	Do Not Shoot Drugs, Avoid Sex And Do Not Breastfeed And Follow Balanced Diet.
ehrid270	Hospital1	patient270	doctor1	HIV/AIDS	antiretroviral therapy (ART)	2019-09-22 16:02:35	Antigen/antibody tests	rid270	HIV/AIDS	antiretroviral therapy	Do Not Shoot Drugs, Avoid Sex And Do Not Breastfeed And Follow Balanced Diet.
ehrid2204	Hospital2	patient2204	doctor1	Heart Disease	Aspirin 75mg,Pain Relieavers	2020-01-17 07:40:36	ECG,Blood Test,CT,MRI	rid2220	Heart Disease and Hypertension	thrombolytics	Regular Physical Activity - Success 30 Minutes A Day, Avoid Saturated And Trans Fat And Fried Foods, As Well As Snacky-Type Foods.
ehrid8	Hospital1	patient8	doctor1	Cirrhosis	ursodiol	2019-05-07 02:02:14	liver biopsy	rid8	Cirrhosis	ursodiol	Eat Foods Like Lean Protein Poultry Or Fish, Strictly Avoid Alcohol.
ehrid1613	Hospital2	patient1613	doctor2	Diarrhea	Loperamide, Bismuth	2021-07-22 22:49:22	Blood test,stool test,Clostridium difficile toxin test	rid1613	infections, travelers' diarrhea	subsalicylate	Avoid Dairy Products, Spicy Foods And All Citrus Foods And Alcohol.
ehrid995	Hospital2	patient995	doctor2	Common Cold	acetaminophen (Tylenol)	2020-10-23 07:19:57	No lab tests exist	rid995	Common Cold	acetaminophen	Wash Your Hands Often, Avoid Touching Your Face, Don't Smoke And Maintain A Healthy Life Style.
ehrid2233	Hospital1	patient2233	doctor2	Heart Disease	Aspirin 75mg,Pain Relieavers	2022-10-04 17:39:48	ECG,Blood Test,CT,MRI	rid2159	Heart Disease and Hypertension	thrombolytics	Regular Physical Activity - Success 30 Minutes A Day, Avoid Saturated And Trans Fat And Fried Foods, As Well As Snacky-Type Foods.
ehrid1940	Hospital1	patient1940	doctor1	Diarrhea	Loperamide, Bismuth	2019-11-01 13:24:41	Blood test,stool test,Clostridium difficile toxin test	rid1940	infections, travelers' diarrhea	subsalicylate	Avoid Dairy Products, Spicy Foods And All Citrus Foods And Alcohol.
ehrid639	Hospital2	patient639	doctor2	Asthma	Combination inhalers	2019-08-25 23:31:57	FeNO test, spirometry	rid639	Asthma	Theophylline -2 Nos	Avoid Smoke of Any Type, Control Asthma Triggers.
ehrid1289	Hospital2	patient1289	doctor2	Diarrhea	Loperamide, Bismuth	2020-08-15 17:48:53	Blood test,stool test,Clostridium difficile toxin test	rid1289	infections, travelers' diarrhea	subsalicylate	Avoid Dairy Products, Spicy Foods And All Citrus Foods And Alcohol.
ehrid505	Hospital2	patient505	doctor2	Common Cold	acetaminophen (Tylenol)	2020-02-24 19:41:15	No lab tests exist	rid505	Common Cold	acetaminophen	Wash Your Hands Often, Avoid Touching Your Face, Don't Smoke And Maintain A Healthy Life Style.
ehrid847	Hospital2	patient847	doctor2	Diabetes	Metformin 250mg -2 Nos	2021-01-06 04:40:48	HbA1C,Fasting Blood Sugar Test	rid847	Diabetes	Metformin 750mg -2 Nos	Regular Physical Activity - Success 30 Minutes A Day, Avoid Sugar, Ready To Eat Foods.
ehrid1980	Hospital1	patient1980	doctor1	HIV/AIDS	antiretroviral therapy (ART)	2022-12-02 17:38:25	Antigen/antibody tests	rid1980	HIV/AIDS	antiretroviral therapy	Do Not Shoot Drugs, Avoid Sex And Do Not Breastfeed And Follow Balanced Diet.
ehrid2048	Hospital1	patient2048	doctor1	Tuberculosis	Rifater >600mg	2021-05-14 10:13:57	Rapid Sputum Test,T-Spot	rid2048	Tuberculosis	Isoniazid INH pills for 6/9 months	Skip Tobacco In All Forms , Don't Consume Alchohol And Limit Caffeinated Drinks.
ehrid1110	Hospital1	patient1110	doctor1	Diarrhea	Loperamide, Bismuth	2022-05-26 15:54:01	Blood test,stool test,Clostridium difficile toxin test	rid1110	infections, travelers' diarrhea	subsalicylate	Avoid Dairy Products, Spicy Foods And All Citrus Foods And Alcohol.
ehrid1087	Hospital2	patient1087	doctor2	Diarrhea	Loperamide, Bismuth	2019-07-07 22:17:11	Blood test,stool test,Clostridium difficile toxin test	rid1087	infections, travelers' diarrhea	subsalicylate	Avoid Dairy Products, Spicy Foods And All Citrus Foods And Alcohol.
ehrid1954	Hospital1	patient1954	doctor1	Diarrhea	Loperamide, Bismuth	2019-03-07 20:33:53	Blood test,stool test,Clostridium difficile toxin test	rid1954	infections, travelers' diarrhea	subsalicylate	Avoid Dairy Products, Spicy Foods And All Citrus Foods And Alcohol.
ehrid1329	Hospital2	patient1329	doctor2	Diarrhea	Loperamide, Bismuth	2021-11-07 13:23:09	Blood test,stool test,Clostridium difficile toxin test	rid1329	infections, travelers' diarrhea	subsalicylate	Avoid Dairy Products, Spicy Foods And All Citrus Foods And Alcohol.
ehrid751	Hospital2	patient751	doctor2	Common Cold	acetaminophen (Tylenol)	2022-05-01 06:00:17	No lab tests exist	rid751	Common Cold	acetaminophen	Wash Your Hands Often, Avoid Touching Your Face, Don't Smoke And Maintain A Healthy Life Style.
ehrid768	Hospital1	patient768	doctor1	Cirrhosis	ursodiol	2021-09-25 15:37:50	liver biopsy	rid768	Cirrhosis	ursodiol	Eat Foods Like Lean Protein Poultry Or Fish, Strictly Avoid Alcohol.
ehrid869	Hospital2	patient869	doctor2	Diabetes	Metformin 250mg -2 Nos	2022-08-26 09:01:57	HbA1C,Fasting Blood Sugar Test	rid869	Diabetes	Metformin 750mg -2 Nos	Regular Physical Activity - Success 30 Minutes A Day, Avoid Sugar, Ready To Eat Foods.
ehrid206	Hospital1	patient206	doctor1	Common Cold	acetaminophen (Tylenol)	2020-06-05 09:32:53	No lab tests exist	rid206	Common Cold	acetaminophen	Wash Your Hands Often, Avoid Touching Your Face, Don't Smoke And Maintain A Healthy Life Style.
ehrid1934	Hospital1	patient1934	doctor1	Diarrhea	Loperamide, Bismuth	2022-05-18 21:00:35	Blood test,stool test,Clostridium difficile toxin test	rid1934	infections, travelers' diarrhea	subsalicylate	Avoid Dairy Products, Spicy Foods And All Citrus Foods And Alcohol.
ehrid1127	Hospital2	patient1127	doctor2	Common Cold	acetaminophen (Tylenol)	2022-02-16 02:43:23	No lab tests exist	rid1127	Common Cold	acetaminophen	Wash Your Hands Often, Avoid Touching Your Face, Don't Smoke And Maintain A Healthy Life Style.
ehrid1427	Hospital2	patient1427	doctor2	Diarrhea	Loperamide, Bismuth	2022-04-12 10:34:53	Blood test,stool test,Clostridium difficile toxin test	rid1427	infections, travelers' diarrhea	subsalicylate	Avoid Dairy Products, Spicy Foods And All Citrus Foods And Alcohol.
ehrid2091	Hospital2	patient2091	doctor2	Heart Disease	Aspirin 75mg,Pain Relieavers	2022-11-26 11:46:51	ECG,Blood Test,CT,MRI	rid2091	Heart Disease	thrombolytics	Regular Physical Activity - Success 30 Minutes A Day, Avoid Saturated And Trans Fat And Fried Foods, As Well As Snacky-Type Foods.
ehrid778	Hospital1	patient778	doctor1	Common Cold	acetaminophen (Tylenol)	2021-01-16 13:36:17	No lab tests exist	rid778	Common Cold	acetaminophen	Wash Your Hands Often, Avoid Touching Your Face, Don't Smoke And Maintain A Healthy Life Style.
ehrid2026	Hospital1	patient2026	doctor1	Diarrhea	Loperamide, Bismuth	2021-02-14 09:08:13	Blood test,stool test,Clostridium difficile toxin test	rid2026	infections, travelers' diarrhea	subsalicylate	Avoid Dairy Products, Spicy Foods And All Citrus Foods And Alcohol.
ehrid1031	Hospital2	patient1031	doctor2	Diarrhea	Loperamide, Bismuth	2020-05-10 16:07:41	Blood test,stool test,Clostridium difficile toxin test	rid1031	infections, travelers' diarrhea	subsalicylate	Avoid Dairy Products, Spicy Foods And All Citrus Foods And Alcohol.
ehrid797	Hospital2	patient797	doctor2	Common Cold	acetaminophen (Tylenol)	2019-03-08 02:30:19	No lab tests exist	rid797	Common Cold	acetaminophen	Wash Your Hands Often, Avoid Touching Your Face, Don't Smoke And Maintain A Healthy Life Style.
ehrid1088	Hospital1	patient1088	doctor1	Tuberculosis	Rifater >600mg	2021-07-06 16:49:34	Rapid Sputum Test,T-Spot	rid1088	Tuberculosis	Isoniazid INH pills for 6/9 months	Skip Tobacco In All Forms , Don't Consume Alchohol And Limit Caffeinated Drinks.
ehrid564	Hospital1	patient564	doctor1	Cirrhosis	ursodiol	2020-06-27 07:42:37	liver biopsy	rid564	Cirrhosis	ursodiol	Eat Foods Like Lean Protein Poultry Or Fish, Strictly Avoid Alcohol.
ehrid2105	Hospital1	patient2105	doctor2	Heart Disease	Aspirin 75mg,Pain Relieavers	2021-04-10 17:18:34	ECG,Blood Test,CT,MRI	rid2183	Heart Disease and Hypertension	thrombolytics	Regular Physical Activity - Success 30 Minutes A Day, Avoid Saturated And Trans Fat And Fried Foods, As Well As Snacky-Type Foods.
ehrid1180	Hospital1	patient1180	doctor1	Diarrhea	Loperamide, Bismuth	2022-06-09 10:21:27	Blood test,stool test,Clostridium difficile toxin test	rid1180	infections, travelers' diarrhea	subsalicylate	Avoid Dairy Products, Spicy Foods And All Citrus Foods And Alcohol.
ehrid190	Hospital1	patient190	doctor1	Diarrhea	Loperamide, Bismuth	2019-03-29 07:08:13	Blood test,stool test,Clostridium difficile toxin test	rid190	infections, travelers' diarrhea	subsalicylate	Avoid Dairy Products, Spicy Foods And All Citrus Foods And Alcohol.
ehrid738	Hospital1	patient738	doctor1	HIV/AIDS	antiretroviral therapy (ART)	2022-05-19 18:32:31	Antigen/antibody tests	rid738	HIV/AIDS	antiretroviral therapy	Do Not Shoot Drugs, Avoid Sex And Do Not Breastfeed And Follow Balanced Diet.
ehrid507	Hospital2	patient507	doctor2	Lung Cancer	Afinitor Disperz	2021-11-23 03:46:27	PET-CT scan,Chest X-ray	rid507	Lung Cancer	Everolimus	Avoid Smoking Or passive Smoking.
ehrid1338	Hospital1	patient1338	doctor1	Diarrhea	Loperamide, Bismuth	2020-02-25 05:18:47	Blood test,stool test,Clostridium difficile toxin test	rid1338	infections, travelers' diarrhea	subsalicylate	Avoid Dairy Products, Spicy Foods And All Citrus Foods And Alcohol.
ehrid1838	Hospital1	patient1838	doctor1	Diarrhea	Loperamide, Bismuth	2020-10-13 17:14:55	Blood test,stool test,Clostridium difficile toxin test	rid1838	infections, travelers' diarrhea	subsalicylate	Avoid Dairy Products, Spicy Foods And All Citrus Foods And Alcohol.
ehrid2118	Hospital2	patient2118	doctor1	Heart Disease	Aspirin 75mg,Pain Relieavers	2022-02-27 10:40:35	ECG,Blood Test,CT,MRI	rid2132	Heart Disease and Hypertension	thrombolytics	Regular Physical Activity - Success 30 Minutes A Day, Avoid Saturated And Trans Fat And Fried Foods, As Well As Snacky-Type Foods.
ehrid350	Hospital1	patient350	doctor1	Fever	paracetamol 500mg	2021-01-30 21:40:50	Blood Test and Urine Test	rid350	Fever	Acetaminophen injection	Avoid Caffeine And Alcohol, Stay Hydrated, Have Ample Amount Of Rest.
ehrid602	Hospital1	patient602	doctor1	Stroke	Aspirin 75mg,tPA	2019-12-03 22:44:41	CT ,MRI,Echocardiogram	rid602	Stroke	clopidogrel,dipyridamole	Avoid Sugar, Salt, Highly Processed Foods, Saturated And Trans Fats And Fried Foods.
ehrid537	Hospital2	patient537	doctor2	Common Cold	acetaminophen (Tylenol)	2022-04-04 09:18:47	No lab tests exist	rid537	Common Cold	acetaminophen	Wash Your Hands Often, Avoid Touching Your Face, Don't Smoke And Maintain A Healthy Life Style.
ehrid633	Hospital2	patient633	doctor2	Common Cold	acetaminophen (Tylenol)	2020-02-17 14:00:02	No lab tests exist	rid633	Common Cold	acetaminophen	Wash Your Hands Often, Avoid Touching Your Face, Don't Smoke And Maintain A Healthy Life Style.
ehrid438	Hospital1	patient438	doctor1	Common Cold	acetaminophen (Tylenol)	2019-10-18 00:08:29	No lab tests exist	rid438	Common Cold	acetaminophen	Wash Your Hands Often, Avoid Touching Your Face, Don't Smoke And Maintain A Healthy Life Style.
ehrid173	Hospital2	patient173	doctor2	Common Cold	acetaminophen (Tylenol)	2019-09-18 11:05:27	No lab tests exist	rid173	Common Cold	acetaminophen	Wash Your Hands Often, Avoid Touching Your Face, Don't Smoke And Maintain A Healthy Life Style.
ehrid1316	Hospital1	patient1316	doctor1	Stroke	Aspirin 75mg,tPA	2022-09-09 09:09:07	CT ,MRI,Echocardiogram	rid1316	Stroke	clopidogrel,dipyridamole	Avoid Sugar, Salt, Highly Processed Foods, Saturated And Trans Fats And Fried Foods.
ehrid1722	Hospital1	patient1722	doctor1	Stomach Cancer	5-FU (fluorouracil) and leucovorin (folinic acid)	2022-08-11 22:12:03	Upper endoscopy	rid1722	Stomach Cancer	chemotherapy	Choose Low-Fat Diary Products, Protien-Rich Foods.
ehrid1744	Hospital1	patient1744	doctor1	Tuberculosis	Rifater >600mg	2020-11-23 09:27:53	Rapid Sputum Test,T-Spot	rid1744	Tuberculosis	Isoniazid INH pills for 6/9 months	Skip Tobacco In All Forms , Don't Consume Alchohol And Limit Caffeinated Drinks.
ehrid423	Hospital2	patient423	doctor2	Asthma	Combination inhalers	2020-08-04 17:15:24	FeNO test, spirometry	rid423	Asthma	Theophylline -2 Nos	Avoid Smoke of Any Type, Control Asthma Triggers.
ehrid2159	Hospital2	patient2159	doctor2	Heart Disease	Aspirin 75mg,Pain Relieavers	2021-05-02 11:15:09	ECG,Blood Test,CT,MRI	rid2176	Heart Disease and Hypertension	thrombolytics	Regular Physical Activity - Success 30 Minutes A Day, Avoid Saturated And Trans Fat And Fried Foods, As Well As Snacky-Type Foods.
ehrid138	Hospital1	patient138	doctor1	Common Cold	acetaminophen (Tylenol)	2020-09-03 23:15:07	No lab tests exist	rid138	Common Cold	acetaminophen	Wash Your Hands Often, Avoid Touching Your Face, Don't Smoke And Maintain A Healthy Life Style.
ehrid1003	Hospital2	patient1003	doctor2	Heart Disease	Aspirin 75mg,Pain Relieavers	2022-10-14 09:39:40	ECG,Blood Test,CT,MRI	rid1003	Heart Disease	thrombolytics	Regular Physical Activity - Success 30 Minutes A Day, Avoid Saturated And Trans Fat And Fried Foods, As Well As Snacky-Type Foods.
ehrid2150	Hospital1	patient2150	doctor1	Heart Disease	Aspirin 75mg,Pain Relieavers	2021-08-13 19:55:50	ECG,Blood Test,CT,MRI	rid2140	Heart Disease and Hypertension	thrombolytics	Regular Physical Activity - Success 30 Minutes A Day, Avoid Saturated And Trans Fat And Fried Foods, As Well As Snacky-Type Foods.
ehrid1199	Hospital2	patient1199	doctor2	Diabetes	Metformin 250mg -2 Nos	2020-08-03 03:54:04	HbA1C,Fasting Blood Sugar Test	rid1199	Diabetes	Metformin 750mg -2 Nos	Regular Physical Activity - Success 30 Minutes A Day, Avoid Sugar, Ready To Eat Foods.
ehrid2067	Hospital2	patient2067	doctor2	Lung Cancer	Afinitor Disperz	2019-02-15 18:01:50	PET-CT scan,Chest X-ray	rid2067	Lung Cancer	Everolimus	Avoid Smoking Or passive Smoking.
ehrid1495	Hospital2	patient1495	doctor2	Common Cold	acetaminophen (Tylenol)	2022-04-19 09:51:23	No lab tests exist	rid1495	Common Cold	acetaminophen	Wash Your Hands Often, Avoid Touching Your Face, Don't Smoke And Maintain A Healthy Life Style.
ehrid1277	Hospital2	patient1277	doctor2	Diarrhea	Loperamide, Bismuth	2019-04-28 05:16:47	Blood test,stool test,Clostridium difficile toxin test	rid1277	infections, travelers' diarrhea	subsalicylate	Avoid Dairy Products, Spicy Foods And All Citrus Foods And Alcohol.
ehrid1343	Hospital2	patient1343	doctor2	Heart Disease	Aspirin 75mg,Pain Relieavers	2019-12-01 11:23:40	ECG,Blood Test,CT,MRI	rid1343	Heart Disease	thrombolytics	Regular Physical Activity - Success 30 Minutes A Day, Avoid Saturated And Trans Fat And Fried Foods, As Well As Snacky-Type Foods.
ehrid974	Hospital1	patient974	doctor1	Common Cold	acetaminophen (Tylenol)	2021-10-30 02:11:05	No lab tests exist	rid974	Common Cold	acetaminophen	Wash Your Hands Often, Avoid Touching Your Face, Don't Smoke And Maintain A Healthy Life Style.
ehrid1895	Hospital2	patient1895	doctor2	Diarrhea	Loperamide, Bismuth	2019-12-19 11:38:17	Blood test,stool test,Clostridium difficile toxin test	rid1895	infections, travelers' diarrhea	subsalicylate	Avoid Dairy Products, Spicy Foods And All Citrus Foods And Alcohol.
ehrid1468	Hospital1	patient1468	doctor1	Diarrhea	Loperamide, Bismuth	2019-05-27 08:49:10	Blood test,stool test,Clostridium difficile toxin test	rid1468	infections, travelers' diarrhea	subsalicylate	Avoid Dairy Products, Spicy Foods And All Citrus Foods And Alcohol.
ehrid1404	Hospital1	patient1404	doctor1	HIV/AIDS	antiretroviral therapy (ART)	2020-03-08 12:53:15	Antigen/antibody tests	rid1404	HIV/AIDS	antiretroviral therapy	Do Not Shoot Drugs, Avoid Sex And Do Not Breastfeed And Follow Balanced Diet.
ehrid622	Hospital1	patient622	doctor1	Common Cold	acetaminophen (Tylenol)	2020-08-23 23:27:21	No lab tests exist	rid622	Common Cold	acetaminophen	Wash Your Hands Often, Avoid Touching Your Face, Don't Smoke And Maintain A Healthy Life Style.
ehrid178	Hospital1	patient178	doctor1	Common Cold	acetaminophen (Tylenol)	2020-01-22 06:16:04	No lab tests exist	rid178	Common Cold	acetaminophen	Wash Your Hands Often, Avoid Touching Your Face, Don't Smoke And Maintain A Healthy Life Style.
ehrid1749	Hospital2	patient1749	doctor2	Diabetes	Metformin 250mg -2 Nos	2019-07-01 08:47:02	HbA1C,Fasting Blood Sugar Test	rid1749	Diabetes	Metformin 750mg -2 Nos	Regular Physical Activity - Success 30 Minutes A Day, Avoid Sugar, Ready To Eat Foods.
ehrid2165	Hospital1	patient2165	doctor2	Heart Disease	Aspirin 75mg,Pain Relieavers	2021-11-18 06:21:15	ECG,Blood Test,CT,MRI	rid2189	Heart Disease and Hypertension	thrombolytics	Regular Physical Activity - Success 30 Minutes A Day, Avoid Saturated And Trans Fat And Fried Foods, As Well As Snacky-Type Foods.
ehrid215	Hospital2	patient215	doctor2	Common Cold	acetaminophen (Tylenol)	2022-07-04 17:15:50	No lab tests exist	rid215	Common Cold	acetaminophen	Wash Your Hands Often, Avoid Touching Your Face, Don't Smoke And Maintain A Healthy Life Style.
ehrid682	Hospital1	patient682	doctor1	Diabetes	Metformin 250mg -2 Nos	2019-01-22 17:04:34	HbA1C,Fasting Blood Sugar Test	rid682	Diabetes	Metformin 750mg -2 Nos	Regular Physical Activity - Success 30 Minutes A Day, Avoid Sugar, Ready To Eat Foods.
ehrid636	Hospital1	patient636	doctor1	Cirrhosis	ursodiol	2021-07-04 00:25:46	liver biopsy	rid636	Cirrhosis	ursodiol	Eat Foods Like Lean Protein Poultry Or Fish, Strictly Avoid Alcohol.
ehrid978	Hospital1	patient978	doctor1	Common Cold	acetaminophen (Tylenol)	2019-01-02 14:33:50	No lab tests exist	rid978	Common Cold	acetaminophen	Wash Your Hands Often, Avoid Touching Your Face, Don't Smoke And Maintain A Healthy Life Style.
ehrid454	Hospital1	patient454	doctor1	Common Cold	acetaminophen (Tylenol)	2020-09-08 09:12:40	No lab tests exist	rid454	Common Cold	acetaminophen	Wash Your Hands Often, Avoid Touching Your Face, Don't Smoke And Maintain A Healthy Life Style.
ehrid1656	Hospital1	patient1656	doctor1	Common Cold	acetaminophen (Tylenol)	2022-02-14 09:00:03	No lab tests exist	rid1656	Common Cold	acetaminophen	Wash Your Hands Often, Avoid Touching Your Face, Don't Smoke And Maintain A Healthy Life Style.
ehrid2062	Hospital1	patient2062	doctor1	Diarrhea	Loperamide, Bismuth	2022-10-05 18:02:41	Blood test,stool test,Clostridium difficile toxin test	rid2062	infections, travelers' diarrhea	subsalicylate	Avoid Dairy Products, Spicy Foods And All Citrus Foods And Alcohol.
ehrid2138	Hospital2	patient2138	doctor1	Heart Disease	Aspirin 75mg,Pain Relieavers	2019-04-24 11:19:55	ECG,Blood Test,CT,MRI	rid2172	Heart Disease and Hypertension	thrombolytics	Regular Physical Activity - Success 30 Minutes A Day, Avoid Saturated And Trans Fat And Fried Foods, As Well As Snacky-Type Foods.
ehrid857	Hospital2	patient857	doctor2	Common Cold	acetaminophen (Tylenol)	2019-02-25 21:06:54	No lab tests exist	rid857	Common Cold	acetaminophen	Wash Your Hands Often, Avoid Touching Your Face, Don't Smoke And Maintain A Healthy Life Style.
ehrid1542	Hospital1	patient1542	doctor1	Diarrhea	Loperamide, Bismuth	2020-02-26 16:06:50	Blood test,stool test,Clostridium difficile toxin test	rid1542	infections, travelers' diarrhea	subsalicylate	Avoid Dairy Products, Spicy Foods And All Citrus Foods And Alcohol.
ehrid1988	Hospital1	patient1988	doctor1	Stroke	Aspirin 75mg,tPA	2021-07-27 08:28:48	CT ,MRI,Echocardiogram	rid1988	Stroke	clopidogrel,dipyridamole	Avoid Sugar, Salt, Highly Processed Foods, Saturated And Trans Fats And Fried Foods.
ehrid143	Hospital2	patient143	doctor2	Lung Cancer	Afinitor Disperz	2021-07-14 15:57:39	PET-CT scan,Chest X-ray	rid143	Lung Cancer	Everolimus	Avoid Smoking Or passive Smoking.
ehrid207	Hospital2	patient207	doctor2	Common Cold	acetaminophen (Tylenol)	2020-06-14 20:55:31	No lab tests exist	rid207	Common Cold	acetaminophen	Wash Your Hands Often, Avoid Touching Your Face, Don't Smoke And Maintain A Healthy Life Style.
ehrid1854	Hospital1	patient1854	doctor1	HIV/AIDS	antiretroviral therapy (ART)	2022-10-07 04:13:43	Antigen/antibody tests	rid1854	HIV/AIDS	antiretroviral therapy	Do Not Shoot Drugs, Avoid Sex And Do Not Breastfeed And Follow Balanced Diet.
ehrid630	Hospital1	patient630	doctor1	Stomach Cancer	5-FU (fluorouracil) and leucovorin (folinic acid)	2020-05-28 22:36:30	Upper endoscopy	rid630	Stomach Cancer	chemotherapy	Choose Low-Fat Diary Products, Protien-Rich Foods.
ehrid1488	Hospital1	patient1488	doctor1	Cirrhosis	ursodiol	2022-08-03 00:37:58	liver biopsy	rid1488	Cirrhosis	ursodiol	Eat Foods Like Lean Protein Poultry Or Fish, Strictly Avoid Alcohol.
ehrid660	Hospital1	patient660	doctor1	Diarrhea	Loperamide, Bismuth	2019-03-14 15:42:55	Blood test,stool test,Clostridium difficile toxin test	rid660	infections, travelers' diarrhea	subsalicylate	Avoid Dairy Products, Spicy Foods And All Citrus Foods And Alcohol.
ehrid1942	Hospital1	patient1942	doctor1	Diarrhea	Loperamide, Bismuth	2022-08-28 19:54:32	Blood test,stool test,Clostridium difficile toxin test	rid1942	infections, travelers' diarrhea	subsalicylate	Avoid Dairy Products, Spicy Foods And All Citrus Foods And Alcohol.
ehrid508	Hospital1	patient508	doctor1	Common Cold	acetaminophen (Tylenol)	2022-06-03 07:23:32	No lab tests exist	rid508	Common Cold	acetaminophen	Wash Your Hands Often, Avoid Touching Your Face, Don't Smoke And Maintain A Healthy Life Style.
ehrid1676	Hospital1	patient1676	doctor1	Diarrhea	Loperamide, Bismuth	2022-05-06 14:36:05	Blood test,stool test,Clostridium difficile toxin test	rid1676	infections, travelers' diarrhea	subsalicylate	Avoid Dairy Products, Spicy Foods And All Citrus Foods And Alcohol.
ehrid1522	Hospital1	patient1522	doctor1	Diarrhea	Loperamide, Bismuth	2020-07-23 07:10:34	Blood test,stool test,Clostridium difficile toxin test	rid1522	infections, travelers' diarrhea	subsalicylate	Avoid Dairy Products, Spicy Foods And All Citrus Foods And Alcohol.
ehrid774	Hospital1	patient774	doctor1	HIV/AIDS	antiretroviral therapy (ART)	2022-09-23 19:31:18	Antigen/antibody tests	rid774	HIV/AIDS	antiretroviral therapy	Do Not Shoot Drugs, Avoid Sex And Do Not Breastfeed And Follow Balanced Diet.
ehrid598	Hospital1	patient598	doctor1	Common Cold	acetaminophen (Tylenol)	2022-02-21 16:23:59	No lab tests exist	rid598	Common Cold	acetaminophen	Wash Your Hands Often, Avoid Touching Your Face, Don't Smoke And Maintain A Healthy Life Style.
ehrid1785	Hospital2	patient1785	doctor2	Stomach Cancer	5-FU (fluorouracil) and leucovorin (folinic acid)	2020-04-13 17:57:27	Upper endoscopy	rid1785	Stomach Cancer	chemotherapy	Choose Low-Fat Diary Products, Protien-Rich Foods.
ehrid1326	Hospital1	patient1326	doctor1	Heart Disease	Aspirin 75mg,Pain Relieavers	2019-05-29 05:22:57	ECG,Blood Test,CT,MRI	rid1326	Heart Disease	thrombolytics	Regular Physical Activity - Success 30 Minutes A Day, Avoid Saturated And Trans Fat And Fried Foods, As Well As Snacky-Type Foods.
ehrid1477	Hospital2	patient1477	doctor2	Diarrhea	Loperamide, Bismuth	2019-03-22 04:34:26	Blood test,stool test,Clostridium difficile toxin test	rid1477	infections, travelers' diarrhea	subsalicylate	Avoid Dairy Products, Spicy Foods And All Citrus Foods And Alcohol.
ehrid16	Hospital1	patient16	doctor1	Tuberculosis	Rifater >600mg	2020-03-12 19:50:34	Rapid Sputum Test,T-Spot	rid16	Tuberculosis	Isoniazid INH pills for 6/9 months	Skip Tobacco In All Forms , Don't Consume Alchohol And Limit Caffeinated Drinks.
ehrid672	Hospital1	patient672	doctor1	Stomach Cancer	5-FU (fluorouracil) and leucovorin (folinic acid)	2021-07-26 12:47:58	Upper endoscopy	rid672	Stomach Cancer	chemotherapy	Choose Low-Fat Diary Products, Protien-Rich Foods.
ehrid1801	Hospital2	patient1801	doctor2	Diarrhea	Loperamide, Bismuth	2021-07-19 18:27:09	Blood test,stool test,Clostridium difficile toxin test	rid1801	infections, travelers' diarrhea	subsalicylate	Avoid Dairy Products, Spicy Foods And All Citrus Foods And Alcohol.
ehrid1550	Hospital1	patient1550	doctor1	Fever	paracetamol 500mg	2021-04-29 19:17:58	Blood Test and Urine Test	rid1550	Fever	Acetaminophen injection	Avoid Caffeine And Alcohol, Stay Hydrated, Have Ample Amount Of Rest.
ehrid583	Hospital2	patient583	doctor2	Diabetes	Metformin 250mg -2 Nos	2022-01-31 22:51:55	HbA1C,Fasting Blood Sugar Test	rid583	Diabetes	Metformin 750mg -2 Nos	Regular Physical Activity - Success 30 Minutes A Day, Avoid Sugar, Ready To Eat Foods.
ehrid1699	Hospital2	patient1699	doctor2	Diarrhea	Loperamide, Bismuth	2022-03-08 05:51:44	Blood test,stool test,Clostridium difficile toxin test	rid1699	infections, travelers' diarrhea	subsalicylate	Avoid Dairy Products, Spicy Foods And All Citrus Foods And Alcohol.
ehrid1966	Hospital1	patient1966	doctor1	Diarrhea	Loperamide, Bismuth	2022-06-02 04:59:46	Blood test,stool test,Clostridium difficile toxin test	rid1966	infections, travelers' diarrhea	subsalicylate	Avoid Dairy Products, Spicy Foods And All Citrus Foods And Alcohol.
ehrid586	Hospital1	patient586	doctor1	Common Cold	acetaminophen (Tylenol)	2022-06-07 15:01:56	No lab tests exist	rid586	Common Cold	acetaminophen	Wash Your Hands Often, Avoid Touching Your Face, Don't Smoke And Maintain A Healthy Life Style.
ehrid1839	Hospital2	patient1839	doctor2	Diarrhea	Loperamide, Bismuth	2020-01-31 00:14:33	Blood test,stool test,Clostridium difficile toxin test	rid1839	infections, travelers' diarrhea	subsalicylate	Avoid Dairy Products, Spicy Foods And All Citrus Foods And Alcohol.
ehrid741	Hospital2	patient741	doctor2	Malaria	Chloroquine phosphate	2021-01-09 15:50:55	Malaria Rapid Diagnostic Test	rid741	Malaria	Artemether/Lumfantrine Treatment	Drink Plenty Of Water, Control Fats Intake, Consume Ripe Papaya, Sweet Lime, Grapes Which Are Rich in Vitamin C
ehrid1975	Hospital2	patient1975	doctor2	Fever	paracetamol 500mg	2022-07-29 16:10:35	Blood Test and Urine Test	rid1975	Fever	Acetaminophen injection	Avoid Caffeine And Alcohol, Stay Hydrated, Have Ample Amount Of Rest.
ehrid1195	Hospital2	patient1195	doctor2	Diarrhea	Loperamide, Bismuth	2022-10-27 02:39:45	Blood test,stool test,Clostridium difficile toxin test	rid1195	infections, travelers' diarrhea	subsalicylate	Avoid Dairy Products, Spicy Foods And All Citrus Foods And Alcohol.
ehrid1734	Hospital1	patient1734	doctor1	Heart Disease	Aspirin 75mg,Pain Relieavers	2021-07-03 03:40:32	ECG,Blood Test,CT,MRI	rid1734	Heart Disease	thrombolytics	Regular Physical Activity - Success 30 Minutes A Day, Avoid Saturated And Trans Fat And Fried Foods, As Well As Snacky-Type Foods.
ehrid576	Hospital1	patient576	doctor1	HIV/AIDS	antiretroviral therapy (ART)	2021-03-01 22:41:28	Antigen/antibody tests	rid576	HIV/AIDS	antiretroviral therapy	Do Not Shoot Drugs, Avoid Sex And Do Not Breastfeed And Follow Balanced Diet.
ehrid1568	Hospital1	patient1568	doctor1	Tuberculosis	Rifater >600mg	2021-01-10 06:45:55	Rapid Sputum Test,T-Spot	rid1568	Tuberculosis	Isoniazid INH pills for 6/9 months	Skip Tobacco In All Forms , Don't Consume Alchohol And Limit Caffeinated Drinks.
ehrid1652	Hospital1	patient1652	doctor1	Stroke	Aspirin 75mg,tPA	2020-09-07 11:08:11	CT ,MRI,Echocardiogram	rid1652	Stroke	clopidogrel,dipyridamole	Avoid Sugar, Salt, Highly Processed Foods, Saturated And Trans Fats And Fried Foods.
ehrid674	Hospital1	patient674	doctor1	Common Cold	acetaminophen (Tylenol)	2020-05-18 10:38:12	No lab tests exist	rid674	Common Cold	acetaminophen	Wash Your Hands Often, Avoid Touching Your Face, Don't Smoke And Maintain A Healthy Life Style.
ehrid56	Hospital1	patient56	doctor1	Stroke	Aspirin 75mg,tPA	2022-08-01 09:51:51	CT ,MRI,Echocardiogram	rid56	Stroke	clopidogrel,dipyridamole	Avoid Sugar, Salt, Highly Processed Foods, Saturated And Trans Fats And Fried Foods.
ehrid1536	Hospital1	patient1536	doctor1	Cirrhosis	ursodiol	2020-03-17 10:36:41	liver biopsy	rid1536	Cirrhosis	ursodiol	Eat Foods Like Lean Protein Poultry Or Fish, Strictly Avoid Alcohol.
ehrid1407	Hospital2	patient1407	doctor2	Stomach Cancer	5-FU (fluorouracil) and leucovorin (folinic acid)	2020-05-26 11:28:27	Upper endoscopy	rid1407	Stomach Cancer	chemotherapy	Choose Low-Fat Diary Products, Protien-Rich Foods.
ehrid1469	Hospital2	patient1469	doctor2	Lung Cancer	Afinitor Disperz	2019-02-10 10:55:47	PET-CT scan,Chest X-ray	rid1469	Lung Cancer	Everolimus	Avoid Smoking Or passive Smoking.
ehrid1258	Hospital1	patient1258	doctor1	Heart Disease	Aspirin 75mg,Pain Relieavers	2020-07-26 07:07:09	ECG,Blood Test,CT,MRI	rid1258	Heart Disease	thrombolytics	Regular Physical Activity - Success 30 Minutes A Day, Avoid Saturated And Trans Fat And Fried Foods, As Well As Snacky-Type Foods.
ehrid463	Hospital2	patient463	doctor2	Common Cold	acetaminophen (Tylenol)	2019-02-19 20:47:38	No lab tests exist	rid463	Common Cold	acetaminophen	Wash Your Hands Often, Avoid Touching Your Face, Don't Smoke And Maintain A Healthy Life Style.
ehrid513	Hospital2	patient513	doctor2	Asthma	Combination inhalers	2022-12-18 23:26:25	FeNO test, spirometry	rid513	Asthma	Theophylline -2 Nos	Avoid Smoke of Any Type, Control Asthma Triggers.
ehrid1914	Hospital1	patient1914	doctor1	Diabetes	Metformin 250mg -2 Nos	2022-12-19 17:59:37	HbA1C,Fasting Blood Sugar Test	rid1914	Diabetes	Metformin 750mg -2 Nos	Regular Physical Activity - Success 30 Minutes A Day, Avoid Sugar, Ready To Eat Foods.
ehrid291	Hospital2	patient291	doctor2	Common Cold	acetaminophen (Tylenol)	2019-08-16 14:37:02	No lab tests exist	rid291	Common Cold	acetaminophen	Wash Your Hands Often, Avoid Touching Your Face, Don't Smoke And Maintain A Healthy Life Style.
ehrid24	Hospital1	patient24	doctor1	Cirrhosis	ursodiol	2020-06-29 03:01:13	liver biopsy	rid24	Cirrhosis	ursodiol	Eat Foods Like Lean Protein Poultry Or Fish, Strictly Avoid Alcohol.
ehrid1701	Hospital2	patient1701	doctor2	Stomach Cancer	5-FU (fluorouracil) and leucovorin (folinic acid)	2021-12-26 03:27:00	Upper endoscopy	rid1701	Stomach Cancer	chemotherapy	Choose Low-Fat Diary Products, Protien-Rich Foods.
ehrid372	Hospital1	patient372	doctor1	Cirrhosis	ursodiol	2019-12-16 13:59:30	liver biopsy	rid372	Cirrhosis	ursodiol	Eat Foods Like Lean Protein Poultry Or Fish, Strictly Avoid Alcohol.
ehrid150	Hospital1	patient150	doctor1	Fever	paracetamol 500mg	2021-01-04 21:35:19	Blood Test and Urine Test	rid150	Fever	Acetaminophen injection	Avoid Caffeine And Alcohol, Stay Hydrated, Have Ample Amount Of Rest.
ehrid2127	Hospital2	patient2127	doctor2	Heart Disease	Aspirin 75mg,Pain Relieavers	2021-10-19 08:23:17	ECG,Blood Test,CT,MRI	rid2248	Heart Disease and Hypertension	thrombolytics	Regular Physical Activity - Success 30 Minutes A Day, Avoid Saturated And Trans Fat And Fried Foods, As Well As Snacky-Type Foods.
ehrid1414	Hospital1	patient1414	doctor1	Stroke	Aspirin 75mg,tPA	2020-07-19 17:58:49	CT ,MRI,Echocardiogram	rid1414	Stroke	clopidogrel,dipyridamole	Avoid Sugar, Salt, Highly Processed Foods, Saturated And Trans Fats And Fried Foods.
ehrid332	Hospital1	patient332	doctor1	Common Cold	acetaminophen (Tylenol)	2021-09-17 20:22:25	No lab tests exist	rid332	Common Cold	acetaminophen	Wash Your Hands Often, Avoid Touching Your Face, Don't Smoke And Maintain A Healthy Life Style.
ehrid1371	Hospital2	patient1371	doctor2	Diarrhea	Loperamide, Bismuth	2022-03-24 18:32:15	Blood test,stool test,Clostridium difficile toxin test	rid1371	infections, travelers' diarrhea	subsalicylate	Avoid Dairy Products, Spicy Foods And All Citrus Foods And Alcohol.
ehrid1230	Hospital1	patient1230	doctor1	Diarrhea	Loperamide, Bismuth	2022-12-04 23:10:58	Blood test,stool test,Clostridium difficile toxin test	rid1230	infections, travelers' diarrhea	subsalicylate	Avoid Dairy Products, Spicy Foods And All Citrus Foods And Alcohol.
ehrid1292	Hospital1	patient1292	doctor1	Malaria	Chloroquine phosphate	2022-02-19 22:15:52	Malaria Rapid Diagnostic Test	rid1292	Malaria	Artemether/Lumfantrine Treatment	Drink Plenty Of Water, Control Fats Intake, Consume Ripe Papaya, Sweet Lime, Grapes Which Are Rich in Vitamin C
ehrid1322	Hospital1	patient1322	doctor1	Diarrhea	Loperamide, Bismuth	2020-10-22 22:06:10	Blood test,stool test,Clostridium difficile toxin test	rid1322	infections, travelers' diarrhea	subsalicylate	Avoid Dairy Products, Spicy Foods And All Citrus Foods And Alcohol.
ehrid601	Hospital2	patient601	doctor2	Common Cold	acetaminophen (Tylenol)	2022-03-14 22:45:55	No lab tests exist	rid601	Common Cold	acetaminophen	Wash Your Hands Often, Avoid Touching Your Face, Don't Smoke And Maintain A Healthy Life Style.
ehrid1602	Hospital1	patient1602	doctor1	HIV/AIDS	antiretroviral therapy (ART)	2020-02-07 08:45:33	Antigen/antibody tests	rid1602	HIV/AIDS	antiretroviral therapy	Do Not Shoot Drugs, Avoid Sex And Do Not Breastfeed And Follow Balanced Diet.
ehrid777	Hospital2	patient777	doctor2	Stomach Cancer	5-FU (fluorouracil) and leucovorin (folinic acid)	2021-05-11 07:20:44	Upper endoscopy	rid777	Stomach Cancer	chemotherapy	Choose Low-Fat Diary Products, Protien-Rich Foods.
ehrid1918	Hospital1	patient1918	doctor1	Stroke	Aspirin 75mg,tPA	2022-04-29 23:38:01	CT ,MRI,Echocardiogram	rid1918	Stroke	clopidogrel,dipyridamole	Avoid Sugar, Salt, Highly Processed Foods, Saturated And Trans Fats And Fried Foods.
ehrid762	Hospital1	patient762	doctor1	Common Cold	acetaminophen (Tylenol)	2021-01-31 03:22:47	No lab tests exist	rid762	Common Cold	acetaminophen	Wash Your Hands Often, Avoid Touching Your Face, Don't Smoke And Maintain A Healthy Life Style.
ehrid852	Hospital1	patient852	doctor1	Cirrhosis	ursodiol	2020-11-04 16:29:20	liver biopsy	rid852	Cirrhosis	ursodiol	Eat Foods Like Lean Protein Poultry Or Fish, Strictly Avoid Alcohol.
ehrid1950	Hospital1	patient1950	doctor1	Fever	paracetamol 500mg	2019-08-29 10:53:36	Blood Test and Urine Test	rid1950	Fever	Acetaminophen injection	Avoid Caffeine And Alcohol, Stay Hydrated, Have Ample Amount Of Rest.
ehrid1080	Hospital1	patient1080	doctor1	HIV/AIDS	antiretroviral therapy (ART)	2019-09-07 13:12:52	Antigen/antibody tests	rid1080	HIV/AIDS	antiretroviral therapy	Do Not Shoot Drugs, Avoid Sex And Do Not Breastfeed And Follow Balanced Diet.
ehrid692	Hospital1	patient692	doctor1	Common Cold	acetaminophen (Tylenol)	2020-08-24 15:39:34	No lab tests exist	rid692	Common Cold	acetaminophen	Wash Your Hands Often, Avoid Touching Your Face, Don't Smoke And Maintain A Healthy Life Style.
ehrid47	Hospital2	patient47	doctor2	Common Cold	acetaminophen (Tylenol)	2020-10-05 09:22:57	No lab tests exist	rid47	Common Cold and Fever	acetaminophen	Wash Your Hands Often, Avoid Touching Your Face, Don't Smoke And Maintain A Healthy Life Style.
ehrid1530	Hospital1	patient1530	doctor1	HIV/AIDS	antiretroviral therapy (ART)	2019-06-01 06:40:33	Antigen/antibody tests	rid1530	HIV/AIDS	antiretroviral therapy	Do Not Shoot Drugs, Avoid Sex And Do Not Breastfeed And Follow Balanced Diet.
ehrid1238	Hospital1	patient1238	doctor1	Diarrhea	Loperamide, Bismuth	2020-01-26 07:41:57	Blood test,stool test,Clostridium difficile toxin test	rid1238	infections, travelers' diarrhea	subsalicylate	Avoid Dairy Products, Spicy Foods And All Citrus Foods And Alcohol.
ehrid1795	Hospital2	patient1795	doctor2	Diarrhea	Loperamide, Bismuth	2022-01-03 04:23:27	Blood test,stool test,Clostridium difficile toxin test	rid1795	infections, travelers' diarrhea	subsalicylate	Avoid Dairy Products, Spicy Foods And All Citrus Foods And Alcohol.
ehrid2188	Hospital1	patient2188	doctor1	Heart Disease	Aspirin 75mg,Pain Relieavers	2020-12-04 03:20:31	ECG,Blood Test,CT,MRI	rid2134	Heart Disease and Hypertension	thrombolytics	Regular Physical Activity - Success 30 Minutes A Day, Avoid Saturated And Trans Fat And Fried Foods, As Well As Snacky-Type Foods.
ehrid2266	Hospital1	patient2266	doctor1	Heart Disease	Aspirin 75mg,Pain Relieavers	2019-05-10 11:31:11	ECG,Blood Test,CT,MRI	rid2269	Heart Disease and Hypertension	thrombolytics	Regular Physical Activity - Success 30 Minutes A Day, Avoid Saturated And Trans Fat And Fried Foods, As Well As Snacky-Type Foods.
ehrid67	Hospital2	patient67	doctor2	Common Cold	acetaminophen (Tylenol)	2022-07-13 18:51:57	No lab tests exist	rid67	Common Cold and Fever	acetaminophen	Wash Your Hands Often, Avoid Touching Your Face, Don't Smoke And Maintain A Healthy Life Style.
ehrid2022	Hospital1	patient2022	doctor1	Diarrhea	Loperamide, Bismuth	2019-08-08 11:14:22	Blood test,stool test,Clostridium difficile toxin test	rid2022	infections, travelers' diarrhea	subsalicylate	Avoid Dairy Products, Spicy Foods And All Citrus Foods And Alcohol.
ehrid2133	Hospital2	patient2133	doctor2	Heart Disease	Aspirin 75mg,Pain Relieavers	2019-03-27 14:07:30	ECG,Blood Test,CT,MRI	rid2162	Heart Disease and Hypertension	thrombolytics	Regular Physical Activity - Success 30 Minutes A Day, Avoid Saturated And Trans Fat And Fried Foods, As Well As Snacky-Type Foods.
ehrid1182	Hospital1	patient1182	doctor1	Diarrhea	Loperamide, Bismuth	2021-04-26 16:53:02	Blood test,stool test,Clostridium difficile toxin test	rid1182	infections, travelers' diarrhea	subsalicylate	Avoid Dairy Products, Spicy Foods And All Citrus Foods And Alcohol.
ehrid899	Hospital2	patient899	doctor2	Common Cold	acetaminophen (Tylenol)	2022-05-29 04:33:40	No lab tests exist	rid899	Common Cold	acetaminophen	Wash Your Hands Often, Avoid Touching Your Face, Don't Smoke And Maintain A Healthy Life Style.
ehrid940	Hospital1	patient940	doctor1	Diarrhea	Loperamide, Bismuth	2019-08-11 01:21:52	Blood test,stool test,Clostridium difficile toxin test	rid940	infections, travelers' diarrhea	subsalicylate	Avoid Dairy Products, Spicy Foods And All Citrus Foods And Alcohol.
ehrid12	Hospital1	patient12	doctor1	Cirrhosis	ursodiol	2022-08-12 14:47:12	liver biopsy	rid12	Cirrhosis	ursodiol	Eat Foods Like Lean Protein Poultry Or Fish, Strictly Avoid Alcohol.
ehrid1017	Hospital2	patient1017	doctor2	Asthma	Combination inhalers	2020-06-21 05:25:31	FeNO test, spirometry	rid1017	Asthma	Theophylline -2 Nos	Avoid Smoke of Any Type, Control Asthma Triggers.
ehrid1693	Hospital2	patient1693	doctor2	Diarrhea	Loperamide, Bismuth	2021-01-30 22:09:46	Blood test,stool test,Clostridium difficile toxin test	rid1693	infections, travelers' diarrhea	subsalicylate	Avoid Dairy Products, Spicy Foods And All Citrus Foods And Alcohol.
ehrid2211	Hospital2	patient2211	doctor2	Heart Disease	Aspirin 75mg,Pain Relieavers	2021-05-22 21:31:42	ECG,Blood Test,CT,MRI	rid2178	Heart Disease and Hypertension	thrombolytics	Regular Physical Activity - Success 30 Minutes A Day, Avoid Saturated And Trans Fat And Fried Foods, As Well As Snacky-Type Foods.
ehrid1788	Hospital1	patient1788	doctor1	Cirrhosis	ursodiol	2020-10-26 06:50:34	liver biopsy	rid1788	Cirrhosis	ursodiol	Eat Foods Like Lean Protein Poultry Or Fish, Strictly Avoid Alcohol.
ehrid1679	Hospital2	patient1679	doctor2	Common Cold	acetaminophen (Tylenol)	2020-01-10 14:07:14	No lab tests exist	rid1679	Common Cold	acetaminophen	Wash Your Hands Often, Avoid Touching Your Face, Don't Smoke And Maintain A Healthy Life Style.
ehrid490	Hospital1	patient490	doctor1	Diarrhea	Loperamide, Bismuth	2020-03-13 15:22:49	Blood test,stool test,Clostridium difficile toxin test	rid490	infections, travelers' diarrhea	subsalicylate	Avoid Dairy Products, Spicy Foods And All Citrus Foods And Alcohol.
ehrid1416	Hospital1	patient1416	doctor1	Cirrhosis	ursodiol	2022-12-02 04:40:32	liver biopsy	rid1416	Cirrhosis	ursodiol	Eat Foods Like Lean Protein Poultry Or Fish, Strictly Avoid Alcohol.
ehrid234	Hospital1	patient234	doctor1	HIV/AIDS	antiretroviral therapy (ART)	2019-03-01 23:57:01	Antigen/antibody tests	rid234	HIV/AIDS	antiretroviral therapy	Do Not Shoot Drugs, Avoid Sex And Do Not Breastfeed And Follow Balanced Diet.
ehrid161	Hospital2	patient161	doctor2	Common Cold	acetaminophen (Tylenol)	2020-04-07 05:20:46	No lab tests exist	rid161	Common Cold	acetaminophen	Wash Your Hands Often, Avoid Touching Your Face, Don't Smoke And Maintain A Healthy Life Style.
ehrid1798	Hospital1	patient1798	doctor1	Diarrhea	Loperamide, Bismuth	2020-02-20 19:43:12	Blood test,stool test,Clostridium difficile toxin test	rid1798	infections, travelers' diarrhea	subsalicylate	Avoid Dairy Products, Spicy Foods And All Citrus Foods And Alcohol.
ehrid1939	Hospital2	patient1939	doctor2	Diarrhea	Loperamide, Bismuth	2022-08-06 09:16:54	Blood test,stool test,Clostridium difficile toxin test	rid1939	infections, travelers' diarrhea	subsalicylate	Avoid Dairy Products, Spicy Foods And All Citrus Foods And Alcohol.
ehrid753	Hospital2	patient753	doctor2	Common Cold	acetaminophen (Tylenol)	2022-11-01 18:24:08	No lab tests exist	rid753	Common Cold	acetaminophen	Wash Your Hands Often, Avoid Touching Your Face, Don't Smoke And Maintain A Healthy Life Style.
ehrid1382	Hospital1	patient1382	doctor1	Diarrhea	Loperamide, Bismuth	2019-03-02 12:57:40	Blood test,stool test,Clostridium difficile toxin test	rid1382	infections, travelers' diarrhea	subsalicylate	Avoid Dairy Products, Spicy Foods And All Citrus Foods And Alcohol.
ehrid1293	Hospital2	patient1293	doctor2	Diarrhea	Loperamide, Bismuth	2021-06-27 05:06:45	Blood test,stool test,Clostridium difficile toxin test	rid1293	infections, travelers' diarrhea	subsalicylate	Avoid Dairy Products, Spicy Foods And All Citrus Foods And Alcohol.
ehrid26	Hospital1	patient26	doctor1	Lung Cancer	Afinitor Disperz	2020-10-08 03:48:29	PET-CT scan,Chest X-ray	rid26	Lung Cancer	Everolimus	Avoid Smoking Or passive Smoking.
ehrid2146	Hospital2	patient2146	doctor1	Heart Disease	Aspirin 75mg,Pain Relieavers	2019-08-02 14:08:05	ECG,Blood Test,CT,MRI	rid2168	Heart Disease and Hypertension	thrombolytics	Regular Physical Activity - Success 30 Minutes A Day, Avoid Saturated And Trans Fat And Fried Foods, As Well As Snacky-Type Foods.
ehrid582	Hospital1	patient582	doctor1	Common Cold	acetaminophen (Tylenol)	2021-01-02 12:45:54	No lab tests exist	rid582	Common Cold	acetaminophen	Wash Your Hands Often, Avoid Touching Your Face, Don't Smoke And Maintain A Healthy Life Style.
ehrid337	Hospital2	patient337	doctor2	Common Cold	acetaminophen (Tylenol)	2022-02-01 21:12:42	No lab tests exist	rid337	Common Cold	acetaminophen	Wash Your Hands Often, Avoid Touching Your Face, Don't Smoke And Maintain A Healthy Life Style.
ehrid558	Hospital1	patient558	doctor1	HIV/AIDS	antiretroviral therapy (ART)	2021-04-20 07:52:31	Antigen/antibody tests	rid558	HIV/AIDS	antiretroviral therapy	Do Not Shoot Drugs, Avoid Sex And Do Not Breastfeed And Follow Balanced Diet.
ehrid1012	Hospital1	patient1012	doctor1	Common Cold	acetaminophen (Tylenol)	2021-06-02 18:07:01	No lab tests exist	rid1012	Common Cold	acetaminophen	Wash Your Hands Often, Avoid Touching Your Face, Don't Smoke And Maintain A Healthy Life Style.
ehrid410	Hospital1	patient410	doctor1	Diarrhea	Loperamide, Bismuth	2019-09-11 18:56:46	Blood test,stool test,Clostridium difficile toxin test	rid410	infections, travelers' diarrhea	subsalicylate	Avoid Dairy Products, Spicy Foods And All Citrus Foods And Alcohol.
ehrid1380	Hospital1	patient1380	doctor1	Common Cold	acetaminophen (Tylenol)	2019-04-03 00:34:52	No lab tests exist	rid1380	Common Cold	acetaminophen	Wash Your Hands Often, Avoid Touching Your Face, Don't Smoke And Maintain A Healthy Life Style.
ehrid1681	Hospital2	patient1681	doctor2	Diarrhea	Loperamide, Bismuth	2022-02-21 02:46:07	Blood test,stool test,Clostridium difficile toxin test	rid1681	infections, travelers' diarrhea	subsalicylate	Avoid Dairy Products, Spicy Foods And All Citrus Foods And Alcohol.
ehrid11	Hospital2	patient11	doctor2	Diabetes	Metformin 250mg -2 Nos	2021-06-16 22:04:12	HbA1C,Fasting Blood Sugar Test	rid11	Diabetes and Chorestrol	Metformin 750mg -2 Nos	Regular Physical Activity - Success 30 Minutes A Day, Avoid Sugar, Ready To Eat Foods.
ehrid102	Hospital1	patient102	doctor1	Heart Disease	Aspirin 75mg,Pain Relieavers	2019-05-03 18:12:33	ECG,Blood Test,CT,MRI	rid102	Heart Disease	thrombolytics	Regular Physical Activity - Success 30 Minutes A Day, Avoid Saturated And Trans Fat And Fried Foods, As Well As Snacky-Type Foods.
ehrid214	Hospital1	patient214	doctor1	Common Cold	acetaminophen (Tylenol)	2019-12-30 10:38:13	No lab tests exist	rid214	Common Cold	acetaminophen	Wash Your Hands Often, Avoid Touching Your Face, Don't Smoke And Maintain A Healthy Life Style.
ehrid1882	Hospital1	patient1882	doctor1	Diarrhea	Loperamide, Bismuth	2020-11-25 22:02:15	Blood test,stool test,Clostridium difficile toxin test	rid1882	infections, travelers' diarrhea	subsalicylate	Avoid Dairy Products, Spicy Foods And All Citrus Foods And Alcohol.
ehrid626	Hospital1	patient626	doctor1	Common Cold	acetaminophen (Tylenol)	2022-10-30 23:04:55	No lab tests exist	rid626	Common Cold	acetaminophen	Wash Your Hands Often, Avoid Touching Your Face, Don't Smoke And Maintain A Healthy Life Style.
ehrid1856	Hospital1	patient1856	doctor1	Tuberculosis	Rifater >600mg	2021-01-06 01:45:24	Rapid Sputum Test,T-Spot	rid1856	Tuberculosis	Isoniazid INH pills for 6/9 months	Skip Tobacco In All Forms , Don't Consume Alchohol And Limit Caffeinated Drinks.
ehrid1981	Hospital2	patient1981	doctor2	Diarrhea	Loperamide, Bismuth	2021-02-13 12:59:32	Blood test,stool test,Clostridium difficile toxin test	rid1981	infections, travelers' diarrhea	subsalicylate	Avoid Dairy Products, Spicy Foods And All Citrus Foods And Alcohol.
ehrid1058	Hospital1	patient1058	doctor1	Common Cold	acetaminophen (Tylenol)	2021-09-07 01:15:23	No lab tests exist	rid1058	Common Cold	acetaminophen	Wash Your Hands Often, Avoid Touching Your Face, Don't Smoke And Maintain A Healthy Life Style.
ehrid2045	Hospital2	patient2045	doctor2	Diarrhea	Loperamide, Bismuth	2020-04-12 14:13:29	Blood test,stool test,Clostridium difficile toxin test	rid2045	infections, travelers' diarrhea	subsalicylate	Avoid Dairy Products, Spicy Foods And All Citrus Foods And Alcohol.
ehrid2077	Hospital2	patient2077	doctor2	Diarrhea	Loperamide, Bismuth	2022-12-30 03:41:33	Blood test,stool test,Clostridium difficile toxin test	rid2077	infections, travelers' diarrhea	subsalicylate	Avoid Dairy Products, Spicy Foods And All Citrus Foods And Alcohol.
ehrid1071	Hospital2	patient1071	doctor2	Stomach Cancer	5-FU (fluorouracil) and leucovorin (folinic acid)	2019-04-14 03:49:07	Upper endoscopy	rid1071	Stomach Cancer	chemotherapy	Choose Low-Fat Diary Products, Protien-Rich Foods.
ehrid1524	Hospital1	patient1524	doctor1	Cirrhosis	ursodiol	2019-12-08 00:24:49	liver biopsy	rid1524	Cirrhosis	ursodiol	Eat Foods Like Lean Protein Poultry Or Fish, Strictly Avoid Alcohol.
ehrid1422	Hospital1	patient1422	doctor1	HIV/AIDS	antiretroviral therapy (ART)	2020-12-26 03:56:37	Antigen/antibody tests	rid1422	HIV/AIDS	antiretroviral therapy	Do Not Shoot Drugs, Avoid Sex And Do Not Breastfeed And Follow Balanced Diet.
ehrid937	Hospital2	patient937	doctor2	Common Cold	acetaminophen (Tylenol)	2021-07-10 02:47:43	No lab tests exist	rid937	Common Cold	acetaminophen	Wash Your Hands Often, Avoid Touching Your Face, Don't Smoke And Maintain A Healthy Life Style.
ehrid875	Hospital2	patient875	doctor2	Fever	paracetamol 500mg	2022-10-08 13:56:47	Blood Test and Urine Test	rid875	Fever	Acetaminophen injection	Avoid Caffeine And Alcohol, Stay Hydrated, Have Ample Amount Of Rest.
ehrid803	Hospital2	patient803	doctor2	Diabetes	Metformin 250mg -2 Nos	2019-09-21 01:12:06	HbA1C,Fasting Blood Sugar Test	rid803	Diabetes	Metformin 750mg -2 Nos	Regular Physical Activity - Success 30 Minutes A Day, Avoid Sugar, Ready To Eat Foods.
ehrid1821	Hospital2	patient1821	doctor2	Diarrhea	Loperamide, Bismuth	2022-01-21 21:00:00	Blood test,stool test,Clostridium difficile toxin test	rid1821	infections, travelers' diarrhea	subsalicylate	Avoid Dairy Products, Spicy Foods And All Citrus Foods And Alcohol.
ehrid2191	Hospital2	patient2191	doctor2	Heart Disease	Aspirin 75mg,Pain Relieavers	2022-12-29 16:05:15	ECG,Blood Test,CT,MRI	rid2198	Heart Disease and Hypertension	thrombolytics	Regular Physical Activity - Success 30 Minutes A Day, Avoid Saturated And Trans Fat And Fried Foods, As Well As Snacky-Type Foods.
ehrid1762	Hospital1	patient1762	doctor1	Diarrhea	Loperamide, Bismuth	2021-05-27 19:17:18	Blood test,stool test,Clostridium difficile toxin test	rid1762	infections, travelers' diarrhea	subsalicylate	Avoid Dairy Products, Spicy Foods And All Citrus Foods And Alcohol.
ehrid828	Hospital1	patient828	doctor1	Common Cold	acetaminophen (Tylenol)	2021-06-11 10:33:15	No lab tests exist	rid828	Common Cold	acetaminophen	Wash Your Hands Often, Avoid Touching Your Face, Don't Smoke And Maintain A Healthy Life Style.
ehrid594	Hospital1	patient594	doctor1	HIV/AIDS	antiretroviral therapy (ART)	2022-07-24 18:21:24	Antigen/antibody tests	rid594	HIV/AIDS	antiretroviral therapy	Do Not Shoot Drugs, Avoid Sex And Do Not Breastfeed And Follow Balanced Diet.
ehrid334	Hospital1	patient334	doctor1	Common Cold	acetaminophen (Tylenol)	2022-10-17 11:36:37	No lab tests exist	rid334	Common Cold	acetaminophen	Wash Your Hands Often, Avoid Touching Your Face, Don't Smoke And Maintain A Healthy Life Style.
ehrid1266	Hospital1	patient1266	doctor1	Diarrhea	Loperamide, Bismuth	2022-04-03 04:35:44	Blood test,stool test,Clostridium difficile toxin test	rid1266	infections, travelers' diarrhea	subsalicylate	Avoid Dairy Products, Spicy Foods And All Citrus Foods And Alcohol.
ehrid97	Hospital2	patient97	doctor2	Common Cold	acetaminophen (Tylenol)	2020-05-04 15:33:55	No lab tests exist	rid97	Common Cold and Fever	acetaminophen	Wash Your Hands Often, Avoid Touching Your Face, Don't Smoke And Maintain A Healthy Life Style.
ehrid921	Hospital2	patient921	doctor2	Common Cold	acetaminophen (Tylenol)	2022-03-20 06:36:47	No lab tests exist	rid921	Common Cold	acetaminophen	Wash Your Hands Often, Avoid Touching Your Face, Don't Smoke And Maintain A Healthy Life Style.
ehrid1820	Hospital1	patient1820	doctor1	Diarrhea	Loperamide, Bismuth	2022-08-05 20:45:43	Blood test,stool test,Clostridium difficile toxin test	rid1820	infections, travelers' diarrhea	subsalicylate	Avoid Dairy Products, Spicy Foods And All Citrus Foods And Alcohol.
ehrid734	Hospital1	patient734	doctor1	Common Cold	acetaminophen (Tylenol)	2022-12-19 15:09:30	No lab tests exist	rid734	Common Cold	acetaminophen	Wash Your Hands Often, Avoid Touching Your Face, Don't Smoke And Maintain A Healthy Life Style.
ehrid1345	Hospital2	patient1345	doctor2	Diarrhea	Loperamide, Bismuth	2019-08-24 09:29:54	Blood test,stool test,Clostridium difficile toxin test	rid1345	infections, travelers' diarrhea	subsalicylate	Avoid Dairy Products, Spicy Foods And All Citrus Foods And Alcohol.
ehrid528	Hospital1	patient528	doctor1	Cirrhosis	ursodiol	2021-03-23 17:06:30	liver biopsy	rid528	Cirrhosis	ursodiol	Eat Foods Like Lean Protein Poultry Or Fish, Strictly Avoid Alcohol.
ehrid453	Hospital2	patient453	doctor2	Common Cold	acetaminophen (Tylenol)	2020-02-26 21:49:47	No lab tests exist	rid453	Common Cold	acetaminophen	Wash Your Hands Often, Avoid Touching Your Face, Don't Smoke And Maintain A Healthy Life Style.
ehrid104	Hospital1	patient104	doctor1	Lung Cancer	Afinitor Disperz	2021-07-25 06:06:00	PET-CT scan,Chest X-ray	rid104	Lung Cancer	Everolimus	Avoid Smoking Or passive Smoking.
ehrid950	Hospital1	patient950	doctor1	Fever	paracetamol 500mg	2022-01-23 16:48:28	Blood Test and Urine Test	rid950	Fever	Acetaminophen injection	Avoid Caffeine And Alcohol, Stay Hydrated, Have Ample Amount Of Rest.
ehrid953	Hospital2	patient953	doctor2	Common Cold	acetaminophen (Tylenol)	2019-09-10 17:48:56	No lab tests exist	rid953	Common Cold	acetaminophen	Wash Your Hands Often, Avoid Touching Your Face, Don't Smoke And Maintain A Healthy Life Style.
ehrid1761	Hospital2	patient1761	doctor2	Diarrhea	Loperamide, Bismuth	2019-06-07 02:23:15	Blood test,stool test,Clostridium difficile toxin test	rid1761	infections, travelers' diarrhea	subsalicylate	Avoid Dairy Products, Spicy Foods And All Citrus Foods And Alcohol.
ehrid1990	Hospital1	patient1990	doctor1	Diarrhea	Loperamide, Bismuth	2022-05-01 05:06:36	Blood test,stool test,Clostridium difficile toxin test	rid1990	infections, travelers' diarrhea	subsalicylate	Avoid Dairy Products, Spicy Foods And All Citrus Foods And Alcohol.
ehrid213	Hospital2	patient213	doctor2	Common Cold	acetaminophen (Tylenol)	2021-08-17 18:04:51	No lab tests exist	rid213	Common Cold	acetaminophen	Wash Your Hands Often, Avoid Touching Your Face, Don't Smoke And Maintain A Healthy Life Style.
ehrid611	Hospital2	patient611	doctor2	Lung Cancer	Afinitor Disperz	2019-10-18 13:09:31	PET-CT scan,Chest X-ray	rid611	Lung Cancer	Everolimus	Avoid Smoking Or passive Smoking.
ehrid610	Hospital1	patient610	doctor1	Diarrhea	Loperamide, Bismuth	2022-06-01 10:30:02	Blood test,stool test,Clostridium difficile toxin test	rid610	infections, travelers' diarrhea	subsalicylate	Avoid Dairy Products, Spicy Foods And All Citrus Foods And Alcohol.
ehrid1248	Hospital1	patient1248	doctor1	Cirrhosis	ursodiol	2020-06-21 11:16:49	liver biopsy	rid1248	Cirrhosis	ursodiol	Eat Foods Like Lean Protein Poultry Or Fish, Strictly Avoid Alcohol.
ehrid1410	Hospital1	patient1410	doctor1	Diarrhea	Loperamide, Bismuth	2021-03-19 18:11:38	Blood test,stool test,Clostridium difficile toxin test	rid1410	infections, travelers' diarrhea	subsalicylate	Avoid Dairy Products, Spicy Foods And All Citrus Foods And Alcohol.
ehrid2052	Hospital1	patient2052	doctor1	HIV/AIDS	antiretroviral therapy (ART)	2020-02-29 05:27:56	Antigen/antibody tests	rid2052	HIV/AIDS	antiretroviral therapy	Do Not Shoot Drugs, Avoid Sex And Do Not Breastfeed And Follow Balanced Diet.
ehrid1915	Hospital2	patient1915	doctor2	Diarrhea	Loperamide, Bismuth	2019-10-01 11:38:22	Blood test,stool test,Clostridium difficile toxin test	rid1915	infections, travelers' diarrhea	subsalicylate	Avoid Dairy Products, Spicy Foods And All Citrus Foods And Alcohol.
ehrid1730	Hospital1	patient1730	doctor1	Diarrhea	Loperamide, Bismuth	2019-06-27 19:54:54	Blood test,stool test,Clostridium difficile toxin test	rid1730	infections, travelers' diarrhea	subsalicylate	Avoid Dairy Products, Spicy Foods And All Citrus Foods And Alcohol.
ehrid2020	Hospital1	patient2020	doctor1	Diarrhea	Loperamide, Bismuth	2021-08-04 14:51:54	Blood test,stool test,Clostridium difficile toxin test	rid2020	infections, travelers' diarrhea	subsalicylate	Avoid Dairy Products, Spicy Foods And All Citrus Foods And Alcohol.
ehrid2043	Hospital2	patient2043	doctor2	Asthma	Combination inhalers	2020-07-03 10:06:57	FeNO test, spirometry	rid2043	Asthma	Theophylline -2 Nos	Avoid Smoke of Any Type, Control Asthma Triggers.
ehrid1533	Hospital2	patient1533	doctor2	Stomach Cancer	5-FU (fluorouracil) and leucovorin (folinic acid)	2019-12-16 11:38:52	Upper endoscopy	rid1533	Stomach Cancer	chemotherapy	Choose Low-Fat Diary Products, Protien-Rich Foods.
ehrid716	Hospital1	patient716	doctor1	Common Cold	acetaminophen (Tylenol)	2019-01-24 21:06:16	No lab tests exist	rid716	Common Cold	acetaminophen	Wash Your Hands Often, Avoid Touching Your Face, Don't Smoke And Maintain A Healthy Life Style.
ehrid112	Hospital1	patient112	doctor1	Tuberculosis	Rifater >600mg	2020-12-12 08:27:05	Rapid Sputum Test,T-Spot	rid112	Tuberculosis	Isoniazid INH pills for 6/9 months	Skip Tobacco In All Forms , Don't Consume Alchohol And Limit Caffeinated Drinks.
ehrid9	Hospital2	patient9	doctor2	Asthma	Combination inhalers	2020-01-04 13:43:06	FeNO test, spirometry	rid9	Asthma	Theophylline -2 Nos	Avoid Smoke of Any Type, Control Asthma Triggers.
ehrid1206	Hospital1	patient1206	doctor1	HIV/AIDS	antiretroviral therapy (ART)	2020-03-01 21:13:08	Antigen/antibody tests	rid1206	HIV/AIDS	antiretroviral therapy	Do Not Shoot Drugs, Avoid Sex And Do Not Breastfeed And Follow Balanced Diet.
ehrid133	Hospital2	patient133	doctor2	Malaria	Chloroquine phosphate	2022-08-24 08:41:01	Malaria Rapid Diagnostic Test	rid133	Malaria	Artemether/Lumfantrine Treatment	Drink Plenty Of Water, Control Fats Intake, Consume Ripe Papaya, Sweet Lime, Grapes Which Are Rich in Vitamin C
ehrid632	Hospital1	patient632	doctor1	Common Cold	acetaminophen (Tylenol)	2022-08-16 00:58:48	No lab tests exist	rid632	Common Cold	acetaminophen	Wash Your Hands Often, Avoid Touching Your Face, Don't Smoke And Maintain A Healthy Life Style.
ehrid1485	Hospital2	patient1485	doctor2	Asthma	Combination inhalers	2022-06-28 21:48:40	FeNO test, spirometry	rid1485	Asthma	Theophylline -2 Nos	Avoid Smoke of Any Type, Control Asthma Triggers.
ehrid1227	Hospital2	patient1227	doctor2	Diarrhea	Loperamide, Bismuth	2020-09-24 15:18:11	Blood test,stool test,Clostridium difficile toxin test	rid1227	infections, travelers' diarrhea	subsalicylate	Avoid Dairy Products, Spicy Foods And All Citrus Foods And Alcohol.
ehrid63	Hospital2	patient63	doctor2	Stomach Cancer	5-FU (fluorouracil) and leucovorin (folinic acid)	2021-10-28 05:57:36	Upper endoscopy	rid63	Stomach Cancer	chemotherapy	Choose Low-Fat Diary Products, Protien-Rich Foods.
ehrid1457	Hospital2	patient1457	doctor2	Diarrhea	Loperamide, Bismuth	2020-10-08 00:40:38	Blood test,stool test,Clostridium difficile toxin test	rid1457	infections, travelers' diarrhea	subsalicylate	Avoid Dairy Products, Spicy Foods And All Citrus Foods And Alcohol.
ehrid493	Hospital2	patient493	doctor2	Heart Disease	Aspirin 75mg,Pain Relieavers	2019-07-14 15:06:14	ECG,Blood Test,CT,MRI	rid493	Heart Disease	thrombolytics	Regular Physical Activity - Success 30 Minutes A Day, Avoid Saturated And Trans Fat And Fried Foods, As Well As Snacky-Type Foods.
ehrid898	Hospital1	patient898	doctor1	Common Cold	acetaminophen (Tylenol)	2021-03-20 08:29:58	No lab tests exist	rid898	Common Cold	acetaminophen	Wash Your Hands Often, Avoid Touching Your Face, Don't Smoke And Maintain A Healthy Life Style.
ehrid2003	Hospital2	patient2003	doctor2	Diarrhea	Loperamide, Bismuth	2019-11-12 22:18:53	Blood test,stool test,Clostridium difficile toxin test	rid2003	infections, travelers' diarrhea	subsalicylate	Avoid Dairy Products, Spicy Foods And All Citrus Foods And Alcohol.
ehrid678	Hospital1	patient678	doctor1	Common Cold	acetaminophen (Tylenol)	2021-07-01 05:27:33	No lab tests exist	rid678	Common Cold	acetaminophen	Wash Your Hands Often, Avoid Touching Your Face, Don't Smoke And Maintain A Healthy Life Style.
ehrid783	Hospital2	patient783	doctor2	Asthma	Combination inhalers	2021-06-22 12:06:40	FeNO test, spirometry	rid783	Asthma	Theophylline -2 Nos	Avoid Smoke of Any Type, Control Asthma Triggers.
ehrid2144	Hospital2	patient2144	doctor1	Heart Disease	Aspirin 75mg,Pain Relieavers	2021-08-14 01:03:57	ECG,Blood Test,CT,MRI	rid2231	Heart Disease and Hypertension	thrombolytics	Regular Physical Activity - Success 30 Minutes A Day, Avoid Saturated And Trans Fat And Fried Foods, As Well As Snacky-Type Foods.
ehrid395	Hospital2	patient395	doctor2	Common Cold	acetaminophen (Tylenol)	2019-02-27 01:22:08	No lab tests exist	rid395	Common Cold	acetaminophen	Wash Your Hands Often, Avoid Touching Your Face, Don't Smoke And Maintain A Healthy Life Style.
ehrid580	Hospital1	patient580	doctor1	Diarrhea	Loperamide, Bismuth	2021-08-29 10:49:44	Blood test,stool test,Clostridium difficile toxin test	rid580	infections, travelers' diarrhea	subsalicylate	Avoid Dairy Products, Spicy Foods And All Citrus Foods And Alcohol.
ehrid483	Hospital2	patient483	doctor2	Common Cold	acetaminophen (Tylenol)	2020-08-02 18:38:49	No lab tests exist	rid483	Common Cold	acetaminophen	Wash Your Hands Often, Avoid Touching Your Face, Don't Smoke And Maintain A Healthy Life Style.
ehrid1883	Hospital2	patient1883	doctor2	Diarrhea	Loperamide, Bismuth	2020-01-11 16:23:08	Blood test,stool test,Clostridium difficile toxin test	rid1883	infections, travelers' diarrhea	subsalicylate	Avoid Dairy Products, Spicy Foods And All Citrus Foods And Alcohol.
ehrid1072	Hospital1	patient1072	doctor1	Tuberculosis	Rifater >600mg	2019-07-03 19:24:30	Rapid Sputum Test,T-Spot	rid1072	Tuberculosis	Isoniazid INH pills for 6/9 months	Skip Tobacco In All Forms , Don't Consume Alchohol And Limit Caffeinated Drinks.
ehrid1575	Hospital2	patient1575	doctor2	Fever	paracetamol 500mg	2021-01-19 10:22:48	Blood Test and Urine Test	rid1575	Fever	Acetaminophen injection	Avoid Caffeine And Alcohol, Stay Hydrated, Have Ample Amount Of Rest.
ehrid1773	Hospital2	patient1773	doctor2	Asthma	Combination inhalers	2020-04-30 19:19:07	FeNO test, spirometry	rid1773	Asthma	Theophylline -2 Nos	Avoid Smoke of Any Type, Control Asthma Triggers.
ehrid156	Hospital1	patient156	doctor1	Cirrhosis	ursodiol	2019-03-27 15:20:30	liver biopsy	rid156	Cirrhosis	ursodiol	Eat Foods Like Lean Protein Poultry Or Fish, Strictly Avoid Alcohol.
ehrid1137	Hospital2	patient1137	doctor2	Diarrhea	Loperamide, Bismuth	2019-11-19 20:43:53	Blood test,stool test,Clostridium difficile toxin test	rid1137	infections, travelers' diarrhea	subsalicylate	Avoid Dairy Products, Spicy Foods And All Citrus Foods And Alcohol.
ehrid2040	Hospital1	patient2040	doctor1	Diarrhea	Loperamide, Bismuth	2020-08-01 23:49:51	Blood test,stool test,Clostridium difficile toxin test	rid2040	infections, travelers' diarrhea	subsalicylate	Avoid Dairy Products, Spicy Foods And All Citrus Foods And Alcohol.
ehrid1430	Hospital1	patient1430	doctor1	Diarrhea	Loperamide, Bismuth	2022-06-20 22:00:00	Blood test,stool test,Clostridium difficile toxin test	rid1430	infections, travelers' diarrhea	subsalicylate	Avoid Dairy Products, Spicy Foods And All Citrus Foods And Alcohol.
ehrid335	Hospital2	patient335	doctor2	Common Cold	acetaminophen (Tylenol)	2019-12-21 14:30:07	No lab tests exist	rid335	Common Cold	acetaminophen	Wash Your Hands Often, Avoid Touching Your Face, Don't Smoke And Maintain A Healthy Life Style.
ehrid1346	Hospital1	patient1346	doctor1	Diarrhea	Loperamide, Bismuth	2022-01-11 05:28:00	Blood test,stool test,Clostridium difficile toxin test	rid1346	infections, travelers' diarrhea	subsalicylate	Avoid Dairy Products, Spicy Foods And All Citrus Foods And Alcohol.
ehrid1615	Hospital2	patient1615	doctor2	Malaria	Chloroquine phosphate	2020-02-28 11:32:52	Malaria Rapid Diagnostic Test	rid1615	Malaria	Artemether/Lumfantrine Treatment	Drink Plenty Of Water, Control Fats Intake, Consume Ripe Papaya, Sweet Lime, Grapes Which Are Rich in Vitamin C
ehrid86	Hospital1	patient86	doctor1	Common Cold	acetaminophen (Tylenol)	2022-12-01 10:43:10	No lab tests exist	rid86	Common Cold and Fever	acetaminophen	Wash Your Hands Often, Avoid Touching Your Face, Don't Smoke And Maintain A Healthy Life Style.
ehrid1036	Hospital1	patient1036	doctor1	Stroke	Aspirin 75mg,tPA	2022-05-08 20:11:55	CT ,MRI,Echocardiogram	rid1036	Stroke	clopidogrel,dipyridamole	Avoid Sugar, Salt, Highly Processed Foods, Saturated And Trans Fats And Fried Foods.
ehrid2238	Hospital2	patient2238	doctor1	Heart Disease	Aspirin 75mg,Pain Relieavers	2021-10-01 06:11:41	ECG,Blood Test,CT,MRI	rid2240	Heart Disease and Hypertension	thrombolytics	Regular Physical Activity - Success 30 Minutes A Day, Avoid Saturated And Trans Fat And Fried Foods, As Well As Snacky-Type Foods.
ehrid109	Hospital2	patient109	doctor2	Common Cold	acetaminophen (Tylenol)	2019-01-06 22:14:47	No lab tests exist	rid109	Common Cold	acetaminophen	Wash Your Hands Often, Avoid Touching Your Face, Don't Smoke And Maintain A Healthy Life Style.
ehrid1775	Hospital2	patient1775	doctor2	Fever	paracetamol 500mg	2019-12-11 02:57:13	Blood Test and Urine Test	rid1775	Fever	Acetaminophen injection	Avoid Caffeine And Alcohol, Stay Hydrated, Have Ample Amount Of Rest.
ehrid185	Hospital2	patient185	doctor2	Common Cold	acetaminophen (Tylenol)	2019-09-29 11:39:50	No lab tests exist	rid185	Common Cold	acetaminophen	Wash Your Hands Often, Avoid Touching Your Face, Don't Smoke And Maintain A Healthy Life Style.
ehrid1172	Hospital1	patient1172	doctor1	Diarrhea	Loperamide, Bismuth	2019-09-17 02:46:01	Blood test,stool test,Clostridium difficile toxin test	rid1172	infections, travelers' diarrhea	subsalicylate	Avoid Dairy Products, Spicy Foods And All Citrus Foods And Alcohol.
ehrid239	Hospital2	patient239	doctor2	Common Cold	acetaminophen (Tylenol)	2020-08-18 19:22:17	No lab tests exist	rid239	Common Cold	acetaminophen	Wash Your Hands Often, Avoid Touching Your Face, Don't Smoke And Maintain A Healthy Life Style.
ehrid1112	Hospital1	patient1112	doctor1	Diarrhea	Loperamide, Bismuth	2019-06-02 19:29:51	Blood test,stool test,Clostridium difficile toxin test	rid1112	infections, travelers' diarrhea	subsalicylate	Avoid Dairy Products, Spicy Foods And All Citrus Foods And Alcohol.
ehrid926	Hospital1	patient926	doctor1	Common Cold	acetaminophen (Tylenol)	2019-07-21 03:16:58	No lab tests exist	rid926	Common Cold	acetaminophen	Wash Your Hands Often, Avoid Touching Your Face, Don't Smoke And Maintain A Healthy Life Style.
ehrid969	Hospital2	patient969	doctor2	Malaria	Chloroquine phosphate	2022-03-29 00:10:57	Malaria Rapid Diagnostic Test	rid969	Malaria	Artemether/Lumfantrine Treatment	Drink Plenty Of Water, Control Fats Intake, Consume Ripe Papaya, Sweet Lime, Grapes Which Are Rich in Vitamin C
ehrid1555	Hospital2	patient1555	doctor2	Diarrhea	Loperamide, Bismuth	2022-01-06 23:53:19	Blood test,stool test,Clostridium difficile toxin test	rid1555	infections, travelers' diarrhea	subsalicylate	Avoid Dairy Products, Spicy Foods And All Citrus Foods And Alcohol.
ehrid1611	Hospital2	patient1611	doctor2	Asthma	Combination inhalers	2019-06-13 10:06:30	FeNO test, spirometry	rid1611	Asthma	Theophylline -2 Nos	Avoid Smoke of Any Type, Control Asthma Triggers.
ehrid216	Hospital1	patient216	doctor1	HIV/AIDS	antiretroviral therapy (ART)	2019-04-27 20:43:36	Antigen/antibody tests	rid216	HIV/AIDS	antiretroviral therapy	Do Not Shoot Drugs, Avoid Sex And Do Not Breastfeed And Follow Balanced Diet.
ehrid186	Hospital1	patient186	doctor1	Common Cold	acetaminophen (Tylenol)	2020-04-04 00:31:07	No lab tests exist	rid186	Common Cold	acetaminophen	Wash Your Hands Often, Avoid Touching Your Face, Don't Smoke And Maintain A Healthy Life Style.
ehrid755	Hospital2	patient755	doctor2	Common Cold	acetaminophen (Tylenol)	2020-11-20 16:20:31	No lab tests exist	rid755	Common Cold	acetaminophen	Wash Your Hands Often, Avoid Touching Your Face, Don't Smoke And Maintain A Healthy Life Style.
ehrid2183	Hospital2	patient2183	doctor2	Heart Disease	Aspirin 75mg,Pain Relieavers	2021-03-17 20:52:41	ECG,Blood Test,CT,MRI	rid2128	Heart Disease and Hypertension	thrombolytics	Regular Physical Activity - Success 30 Minutes A Day, Avoid Saturated And Trans Fat And Fried Foods, As Well As Snacky-Type Foods.
ehrid2088	Hospital1	patient2088	doctor1	HIV/AIDS	antiretroviral therapy (ART)	2021-11-21 05:17:40	Antigen/antibody tests	rid2088	HIV/AIDS	antiretroviral therapy	Do Not Shoot Drugs, Avoid Sex And Do Not Breastfeed And Follow Balanced Diet.
ehrid947	Hospital2	patient947	doctor2	Common Cold	acetaminophen (Tylenol)	2019-01-26 10:37:12	No lab tests exist	rid947	Common Cold	acetaminophen	Wash Your Hands Often, Avoid Touching Your Face, Don't Smoke And Maintain A Healthy Life Style.
ehrid1501	Hospital2	patient1501	doctor2	Malaria	Chloroquine phosphate	2020-09-09 02:34:54	Malaria Rapid Diagnostic Test	rid1501	Malaria	Artemether/Lumfantrine Treatment	Drink Plenty Of Water, Control Fats Intake, Consume Ripe Papaya, Sweet Lime, Grapes Which Are Rich in Vitamin C
ehrid323	Hospital2	patient323	doctor2	Malaria	Chloroquine phosphate	2019-04-30 18:37:50	Malaria Rapid Diagnostic Test	rid323	Malaria	Artemether/Lumfantrine Treatment	Drink Plenty Of Water, Control Fats Intake, Consume Ripe Papaya, Sweet Lime, Grapes Which Are Rich in Vitamin C
ehrid252	Hospital1	patient252	doctor1	Stomach Cancer	5-FU (fluorouracil) and leucovorin (folinic acid)	2021-11-18 20:26:09	Upper endoscopy	rid252	Stomach Cancer	chemotherapy	Choose Low-Fat Diary Products, Protien-Rich Foods.
ehrid403	Hospital2	patient403	doctor2	Lung Cancer	Afinitor Disperz	2021-01-07 03:18:19	PET-CT scan,Chest X-ray	rid403	Lung Cancer	Everolimus	Avoid Smoking Or passive Smoking.
ehrid1141	Hospital2	patient1141	doctor2	Diarrhea	Loperamide, Bismuth	2021-04-05 09:50:49	Blood test,stool test,Clostridium difficile toxin test	rid1141	infections, travelers' diarrhea	subsalicylate	Avoid Dairy Products, Spicy Foods And All Citrus Foods And Alcohol.
ehrid854	Hospital1	patient854	doctor1	Stroke	Aspirin 75mg,tPA	2019-11-21 07:50:37	CT ,MRI,Echocardiogram	rid854	Stroke	clopidogrel,dipyridamole	Avoid Sugar, Salt, Highly Processed Foods, Saturated And Trans Fats And Fried Foods.
ehrid1614	Hospital1	patient1614	doctor1	Diarrhea	Loperamide, Bismuth	2022-08-27 01:22:58	Blood test,stool test,Clostridium difficile toxin test	rid1614	infections, travelers' diarrhea	subsalicylate	Avoid Dairy Products, Spicy Foods And All Citrus Foods And Alcohol.
ehrid118	Hospital1	patient118	doctor1	Common Cold	acetaminophen (Tylenol)	2019-02-03 23:38:43	No lab tests exist	rid118	Common Cold	acetaminophen	Wash Your Hands Often, Avoid Touching Your Face, Don't Smoke And Maintain A Healthy Life Style.
ehrid892	Hospital1	patient892	doctor1	Common Cold	acetaminophen (Tylenol)	2021-11-04 19:44:52	No lab tests exist	rid892	Common Cold	acetaminophen	Wash Your Hands Often, Avoid Touching Your Face, Don't Smoke And Maintain A Healthy Life Style.
ehrid275	Hospital2	patient275	doctor2	Fever	paracetamol 500mg	2020-05-23 02:28:54	Blood Test and Urine Test	rid275	Fever	Acetaminophen injection	Avoid Caffeine And Alcohol, Stay Hydrated, Have Ample Amount Of Rest.
ehrid727	Hospital2	patient727	doctor2	Common Cold	acetaminophen (Tylenol)	2021-12-03 01:44:09	No lab tests exist	rid727	Common Cold	acetaminophen	Wash Your Hands Often, Avoid Touching Your Face, Don't Smoke And Maintain A Healthy Life Style.
ehrid772	Hospital1	patient772	doctor1	Common Cold	acetaminophen (Tylenol)	2020-08-28 08:08:01	No lab tests exist	rid772	Common Cold	acetaminophen	Wash Your Hands Often, Avoid Touching Your Face, Don't Smoke And Maintain A Healthy Life Style.
ehrid1819	Hospital2	patient1819	doctor2	Heart Disease	Aspirin 75mg,Pain Relieavers	2022-05-11 00:42:21	ECG,Blood Test,CT,MRI	rid1819	Heart Disease	thrombolytics	Regular Physical Activity - Success 30 Minutes A Day, Avoid Saturated And Trans Fat And Fried Foods, As Well As Snacky-Type Foods.
ehrid2097	Hospital2	patient2097	doctor2	Asthma	Combination inhalers	2021-06-13 17:03:44	FeNO test, spirometry	rid2097	Asthma	Theophylline -2 Nos	Avoid Smoke of Any Type, Control Asthma Triggers.
ehrid2193	Hospital2	patient2193	doctor2	Heart Disease	Aspirin 75mg,Pain Relieavers	2021-03-22 13:22:43	ECG,Blood Test,CT,MRI	rid2219	Heart Disease and Hypertension	thrombolytics	Regular Physical Activity - Success 30 Minutes A Day, Avoid Saturated And Trans Fat And Fried Foods, As Well As Snacky-Type Foods.
ehrid840	Hospital1	patient840	doctor1	Stomach Cancer	5-FU (fluorouracil) and leucovorin (folinic acid)	2020-12-24 23:15:22	Upper endoscopy	rid840	Stomach Cancer	chemotherapy	Choose Low-Fat Diary Products, Protien-Rich Foods.
ehrid393	Hospital2	patient393	doctor2	Common Cold	acetaminophen (Tylenol)	2022-07-05 14:41:50	No lab tests exist	rid393	Common Cold	acetaminophen	Wash Your Hands Often, Avoid Touching Your Face, Don't Smoke And Maintain A Healthy Life Style.
ehrid134	Hospital1	patient134	doctor1	Common Cold	acetaminophen (Tylenol)	2021-03-12 16:03:27	No lab tests exist	rid134	Common Cold	acetaminophen	Wash Your Hands Often, Avoid Touching Your Face, Don't Smoke And Maintain A Healthy Life Style.
ehrid529	Hospital2	patient529	doctor2	Common Cold	acetaminophen (Tylenol)	2022-01-09 11:05:55	No lab tests exist	rid529	Common Cold	acetaminophen	Wash Your Hands Often, Avoid Touching Your Face, Don't Smoke And Maintain A Healthy Life Style.
ehrid1276	Hospital1	patient1276	doctor1	Diabetes	Metformin 250mg -2 Nos	2020-12-18 14:48:07	HbA1C,Fasting Blood Sugar Test	rid1276	Diabetes	Metformin 750mg -2 Nos	Regular Physical Activity - Success 30 Minutes A Day, Avoid Sugar, Ready To Eat Foods.
ehrid1381	Hospital2	patient1381	doctor2	Diarrhea	Loperamide, Bismuth	2022-04-05 21:19:07	Blood test,stool test,Clostridium difficile toxin test	rid1381	infections, travelers' diarrhea	subsalicylate	Avoid Dairy Products, Spicy Foods And All Citrus Foods And Alcohol.
ehrid246	Hospital1	patient246	doctor1	Common Cold	acetaminophen (Tylenol)	2019-09-23 02:43:13	No lab tests exist	rid246	Common Cold	acetaminophen	Wash Your Hands Often, Avoid Touching Your Face, Don't Smoke And Maintain A Healthy Life Style.
ehrid1490	Hospital1	patient1490	doctor1	Diarrhea	Loperamide, Bismuth	2022-07-19 20:45:27	Blood test,stool test,Clostridium difficile toxin test	rid1490	infections, travelers' diarrhea	subsalicylate	Avoid Dairy Products, Spicy Foods And All Citrus Foods And Alcohol.
ehrid784	Hospital1	patient784	doctor1	Tuberculosis	Rifater >600mg	2022-02-06 20:26:43	Rapid Sputum Test,T-Spot	rid784	Tuberculosis	Isoniazid INH pills for 6/9 months	Skip Tobacco In All Forms , Don't Consume Alchohol And Limit Caffeinated Drinks.
ehrid122	Hospital1	patient122	doctor1	Common Cold	acetaminophen (Tylenol)	2019-07-18 19:38:51	No lab tests exist	rid122	Common Cold	acetaminophen	Wash Your Hands Often, Avoid Touching Your Face, Don't Smoke And Maintain A Healthy Life Style.
ehrid1165	Hospital2	patient1165	doctor2	Diarrhea	Loperamide, Bismuth	2022-05-01 21:09:35	Blood test,stool test,Clostridium difficile toxin test	rid1165	infections, travelers' diarrhea	subsalicylate	Avoid Dairy Products, Spicy Foods And All Citrus Foods And Alcohol.
ehrid740	Hospital1	patient740	doctor1	Diarrhea	Loperamide, Bismuth	2021-03-15 21:21:09	Blood test,stool test,Clostridium difficile toxin test	rid740	infections, travelers' diarrhea	subsalicylate	Avoid Dairy Products, Spicy Foods And All Citrus Foods And Alcohol.
ehrid1397	Hospital2	patient1397	doctor2	Diabetes	Metformin 250mg -2 Nos	2021-03-26 20:47:38	HbA1C,Fasting Blood Sugar Test	rid1397	Diabetes	Metformin 750mg -2 Nos	Regular Physical Activity - Success 30 Minutes A Day, Avoid Sugar, Ready To Eat Foods.
ehrid1616	Hospital1	patient1616	doctor1	Tuberculosis	Rifater >600mg	2019-07-18 22:14:34	Rapid Sputum Test,T-Spot	rid1616	Tuberculosis	Isoniazid INH pills for 6/9 months	Skip Tobacco In All Forms , Don't Consume Alchohol And Limit Caffeinated Drinks.
ehrid1408	Hospital1	patient1408	doctor1	Tuberculosis	Rifater >600mg	2022-08-17 07:41:33	Rapid Sputum Test,T-Spot	rid1408	Tuberculosis	Isoniazid INH pills for 6/9 months	Skip Tobacco In All Forms , Don't Consume Alchohol And Limit Caffeinated Drinks.
ehrid419	Hospital2	patient419	doctor2	Common Cold	acetaminophen (Tylenol)	2019-12-19 02:41:09	No lab tests exist	rid419	Common Cold	acetaminophen	Wash Your Hands Often, Avoid Touching Your Face, Don't Smoke And Maintain A Healthy Life Style.
ehrid302	Hospital1	patient302	doctor1	Common Cold	acetaminophen (Tylenol)	2022-08-11 14:29:15	No lab tests exist	rid302	Common Cold	acetaminophen	Wash Your Hands Often, Avoid Touching Your Face, Don't Smoke And Maintain A Healthy Life Style.
ehrid50	Hospital1	patient50	doctor1	Fever	paracetamol 500mg	2022-05-27 01:22:06	Blood Test and Urine Test	rid50	Fever	Acetaminophen injection	Avoid Caffeine And Alcohol, Stay Hydrated, Have Ample Amount Of Rest.
ehrid1720	Hospital1	patient1720	doctor1	Diarrhea	Loperamide, Bismuth	2020-10-12 12:37:25	Blood test,stool test,Clostridium difficile toxin test	rid1720	infections, travelers' diarrhea	subsalicylate	Avoid Dairy Products, Spicy Foods And All Citrus Foods And Alcohol.
ehrid371	Hospital2	patient371	doctor2	Common Cold	acetaminophen (Tylenol)	2022-12-24 23:17:15	No lab tests exist	rid371	Common Cold	acetaminophen	Wash Your Hands Often, Avoid Touching Your Face, Don't Smoke And Maintain A Healthy Life Style.
ehrid1351	Hospital2	patient1351	doctor2	Diarrhea	Loperamide, Bismuth	2020-10-16 11:46:27	Blood test,stool test,Clostridium difficile toxin test	rid1351	infections, travelers' diarrhea	subsalicylate	Avoid Dairy Products, Spicy Foods And All Citrus Foods And Alcohol.
ehrid865	Hospital2	patient865	doctor2	Common Cold	acetaminophen (Tylenol)	2019-06-07 05:53:13	No lab tests exist	rid865	Common Cold	acetaminophen	Wash Your Hands Often, Avoid Touching Your Face, Don't Smoke And Maintain A Healthy Life Style.
ehrid2063	Hospital2	patient2063	doctor2	Diarrhea	Loperamide, Bismuth	2021-12-23 23:13:44	Blood test,stool test,Clostridium difficile toxin test	rid2063	infections, travelers' diarrhea	subsalicylate	Avoid Dairy Products, Spicy Foods And All Citrus Foods And Alcohol.
ehrid1944	Hospital1	patient1944	doctor1	HIV/AIDS	antiretroviral therapy (ART)	2021-11-06 02:57:26	Antigen/antibody tests	rid1944	HIV/AIDS	antiretroviral therapy	Do Not Shoot Drugs, Avoid Sex And Do Not Breastfeed And Follow Balanced Diet.
ehrid1015	Hospital2	patient1015	doctor2	Diarrhea	Loperamide, Bismuth	2022-03-22 22:04:32	Blood test,stool test,Clostridium difficile toxin test	rid1015	infections, travelers' diarrhea	subsalicylate	Avoid Dairy Products, Spicy Foods And All Citrus Foods And Alcohol.
ehrid2070	Hospital1	patient2070	doctor1	Common Cold	acetaminophen (Tylenol)	2020-09-26 02:56:07	No lab tests exist	rid2070	Common Cold	acetaminophen	Wash Your Hands Often, Avoid Touching Your Face, Don't Smoke And Maintain A Healthy Life Style.
ehrid1863	Hospital2	patient1863	doctor2	Common Cold	acetaminophen (Tylenol)	2019-09-07 05:31:29	No lab tests exist	rid1863	Common Cold	acetaminophen	Wash Your Hands Often, Avoid Touching Your Face, Don't Smoke And Maintain A Healthy Life Style.
ehrid105	Hospital2	patient105	doctor2	Stomach Cancer	5-FU (fluorouracil) and leucovorin (folinic acid)	2022-07-17 00:32:51	Upper endoscopy	rid105	Stomach Cancer	chemotherapy	Choose Low-Fat Diary Products, Protien-Rich Foods.
ehrid473	Hospital2	patient473	doctor2	Diabetes	Metformin 250mg -2 Nos	2019-05-03 06:06:20	HbA1C,Fasting Blood Sugar Test	rid473	Diabetes	Metformin 750mg -2 Nos	Regular Physical Activity - Success 30 Minutes A Day, Avoid Sugar, Ready To Eat Foods.
ehrid2234	Hospital2	patient2234	doctor1	Heart Disease	Aspirin 75mg,Pain Relieavers	2021-04-25 14:20:24	ECG,Blood Test,CT,MRI	rid2193	Heart Disease and Hypertension	thrombolytics	Regular Physical Activity - Success 30 Minutes A Day, Avoid Saturated And Trans Fat And Fried Foods, As Well As Snacky-Type Foods.
ehrid139	Hospital2	patient139	doctor2	Common Cold	acetaminophen (Tylenol)	2020-01-08 05:36:53	No lab tests exist	rid139	Common Cold	acetaminophen	Wash Your Hands Often, Avoid Touching Your Face, Don't Smoke And Maintain A Healthy Life Style.
ehrid1211	Hospital2	patient1211	doctor2	Diarrhea	Loperamide, Bismuth	2021-01-01 16:20:22	Blood test,stool test,Clostridium difficile toxin test	rid1211	infections, travelers' diarrhea	subsalicylate	Avoid Dairy Products, Spicy Foods And All Citrus Foods And Alcohol.
ehrid1786	Hospital1	patient1786	doctor1	Malaria	Chloroquine phosphate	2022-08-05 08:01:18	Malaria Rapid Diagnostic Test	rid1786	Malaria	Artemether/Lumfantrine Treatment	Drink Plenty Of Water, Control Fats Intake, Consume Ripe Papaya, Sweet Lime, Grapes Which Are Rich in Vitamin C
ehrid425	Hospital2	patient425	doctor2	Fever	paracetamol 500mg	2019-08-22 11:40:09	Blood Test and Urine Test	rid425	Fever	Acetaminophen injection	Avoid Caffeine And Alcohol, Stay Hydrated, Have Ample Amount Of Rest.
ehrid1815	Hospital2	patient1815	doctor2	Alzheimer	Galantamine, rivastigmine	2019-08-19 10:13:16	MRI,CT	rid1815	Alzheimer	donepezil	Follow Mind Diet, Should Have <4 Servings A Week Of Red Meat, Less Than A Tablespoon Of Butter A Day.
ehrid1311	Hospital2	patient1311	doctor2	Common Cold	acetaminophen (Tylenol)	2020-02-14 10:38:05	No lab tests exist	rid1311	Common Cold	acetaminophen	Wash Your Hands Often, Avoid Touching Your Face, Don't Smoke And Maintain A Healthy Life Style.
ehrid6	Hospital1	patient6	doctor1	Heart Disease	Aspirin 75mg,Pain Relieavers	2022-12-04 13:56:02	ECG,Blood Test,CT,MRI	rid6	Heart Disease and Hypertension	thrombolytics	Regular Physical Activity - Success 30 Minutes A Day, Avoid Saturated And Trans Fat And Fried Foods, As Well As Snacky-Type Foods.
ehrid1814	Hospital1	patient1814	doctor1	Diarrhea	Loperamide, Bismuth	2019-05-01 08:14:50	Blood test,stool test,Clostridium difficile toxin test	rid1814	infections, travelers' diarrhea	subsalicylate	Avoid Dairy Products, Spicy Foods And All Citrus Foods And Alcohol.
ehrid1768	Hospital1	patient1768	doctor1	Heart Disease	Aspirin 75mg,Pain Relieavers	2019-10-26 04:41:40	ECG,Blood Test,CT,MRI	rid1768	Heart Disease	thrombolytics	Regular Physical Activity - Success 30 Minutes A Day, Avoid Saturated And Trans Fat And Fried Foods, As Well As Snacky-Type Foods.
ehrid1873	Hospital2	patient1873	doctor2	Diarrhea	Loperamide, Bismuth	2019-10-25 08:03:19	Blood test,stool test,Clostridium difficile toxin test	rid1873	infections, travelers' diarrhea	subsalicylate	Avoid Dairy Products, Spicy Foods And All Citrus Foods And Alcohol.
ehrid383	Hospital2	patient383	doctor2	Common Cold	acetaminophen (Tylenol)	2021-11-09 07:32:30	No lab tests exist	rid383	Common Cold	acetaminophen	Wash Your Hands Often, Avoid Touching Your Face, Don't Smoke And Maintain A Healthy Life Style.
ehrid1834	Hospital1	patient1834	doctor1	Stroke	Aspirin 75mg,tPA	2021-04-04 01:10:06	CT ,MRI,Echocardiogram	rid1834	Stroke	clopidogrel,dipyridamole	Avoid Sugar, Salt, Highly Processed Foods, Saturated And Trans Fats And Fried Foods.
ehrid342	Hospital1	patient342	doctor1	HIV/AIDS	antiretroviral therapy (ART)	2021-12-13 18:40:38	Antigen/antibody tests	rid342	HIV/AIDS	antiretroviral therapy	Do Not Shoot Drugs, Avoid Sex And Do Not Breastfeed And Follow Balanced Diet.
ehrid1336	Hospital1	patient1336	doctor1	Diarrhea	Loperamide, Bismuth	2020-01-12 14:05:54	Blood test,stool test,Clostridium difficile toxin test	rid1336	infections, travelers' diarrhea	subsalicylate	Avoid Dairy Products, Spicy Foods And All Citrus Foods And Alcohol.
ehrid736	Hospital1	patient736	doctor1	Common Cold	acetaminophen (Tylenol)	2019-05-13 17:50:28	No lab tests exist	rid736	Common Cold	acetaminophen	Wash Your Hands Often, Avoid Touching Your Face, Don't Smoke And Maintain A Healthy Life Style.
ehrid934	Hospital1	patient934	doctor1	Common Cold	acetaminophen (Tylenol)	2020-07-22 02:06:09	No lab tests exist	rid934	Common Cold	acetaminophen	Wash Your Hands Often, Avoid Touching Your Face, Don't Smoke And Maintain A Healthy Life Style.
ehrid668	Hospital1	patient668	doctor1	Common Cold	acetaminophen (Tylenol)	2020-04-28 09:39:52	No lab tests exist	rid668	Common Cold	acetaminophen	Wash Your Hands Often, Avoid Touching Your Face, Don't Smoke And Maintain A Healthy Life Style.
ehrid884	Hospital1	patient884	doctor1	Heart Disease	Aspirin 75mg,Pain Relieavers	2019-11-04 19:01:33	ECG,Blood Test,CT,MRI	rid884	Heart Disease	thrombolytics	Regular Physical Activity - Success 30 Minutes A Day, Avoid Saturated And Trans Fat And Fried Foods, As Well As Snacky-Type Foods.
ehrid1163	Hospital2	patient1163	doctor2	Diarrhea	Loperamide, Bismuth	2022-10-04 07:13:56	Blood test,stool test,Clostridium difficile toxin test	rid1163	infections, travelers' diarrhea	subsalicylate	Avoid Dairy Products, Spicy Foods And All Citrus Foods And Alcohol.
ehrid515	Hospital2	patient515	doctor2	Common Cold	acetaminophen (Tylenol)	2022-09-05 21:24:47	No lab tests exist	rid515	Common Cold	acetaminophen	Wash Your Hands Often, Avoid Touching Your Face, Don't Smoke And Maintain A Healthy Life Style.
ehrid1927	Hospital2	patient1927	doctor2	Diarrhea	Loperamide, Bismuth	2019-01-17 19:40:21	Blood test,stool test,Clostridium difficile toxin test	rid1927	infections, travelers' diarrhea	subsalicylate	Avoid Dairy Products, Spicy Foods And All Citrus Foods And Alcohol.
ehrid2032	Hospital1	patient2032	doctor1	Tuberculosis	Rifater >600mg	2020-07-30 15:57:50	Rapid Sputum Test,T-Spot	rid2032	Tuberculosis	Isoniazid INH pills for 6/9 months	Skip Tobacco In All Forms , Don't Consume Alchohol And Limit Caffeinated Drinks.
ehrid1384	Hospital1	patient1384	doctor1	Diarrhea	Loperamide, Bismuth	2021-04-19 06:00:31	Blood test,stool test,Clostridium difficile toxin test	rid1384	infections, travelers' diarrhea	subsalicylate	Avoid Dairy Products, Spicy Foods And All Citrus Foods And Alcohol.
ehrid1270	Hospital1	patient1270	doctor1	Diarrhea	Loperamide, Bismuth	2020-01-25 10:42:45	Blood test,stool test,Clostridium difficile toxin test	rid1270	infections, travelers' diarrhea	subsalicylate	Avoid Dairy Products, Spicy Foods And All Citrus Foods And Alcohol.
ehrid1411	Hospital2	patient1411	doctor2	Heart Disease	Aspirin 75mg,Pain Relieavers	2022-03-02 04:40:55	ECG,Blood Test,CT,MRI	rid1411	Heart Disease	thrombolytics	Regular Physical Activity - Success 30 Minutes A Day, Avoid Saturated And Trans Fat And Fried Foods, As Well As Snacky-Type Foods.
ehrid2222	Hospital1	patient2222	doctor1	Heart Disease	Aspirin 75mg,Pain Relieavers	2021-05-26 03:08:09	ECG,Blood Test,CT,MRI	rid2227	Heart Disease and Hypertension	thrombolytics	Regular Physical Activity - Success 30 Minutes A Day, Avoid Saturated And Trans Fat And Fried Foods, As Well As Snacky-Type Foods.
ehrid673	Hospital2	patient673	doctor2	Common Cold	acetaminophen (Tylenol)	2022-11-13 05:42:43	No lab tests exist	rid673	Common Cold	acetaminophen	Wash Your Hands Often, Avoid Touching Your Face, Don't Smoke And Maintain A Healthy Life Style.
ehrid211	Hospital2	patient211	doctor2	Common Cold	acetaminophen (Tylenol)	2019-09-22 17:33:21	No lab tests exist	rid211	Common Cold	acetaminophen	Wash Your Hands Often, Avoid Touching Your Face, Don't Smoke And Maintain A Healthy Life Style.
ehrid1286	Hospital1	patient1286	doctor1	Diarrhea	Loperamide, Bismuth	2019-09-09 05:24:46	Blood test,stool test,Clostridium difficile toxin test	rid1286	infections, travelers' diarrhea	subsalicylate	Avoid Dairy Products, Spicy Foods And All Citrus Foods And Alcohol.
ehrid1969	Hospital2	patient1969	doctor2	Diabetes	Metformin 250mg -2 Nos	2020-09-15 10:07:15	HbA1C,Fasting Blood Sugar Test	rid1969	Diabetes	Metformin 750mg -2 Nos	Regular Physical Activity - Success 30 Minutes A Day, Avoid Sugar, Ready To Eat Foods.
ehrid1233	Hospital2	patient1233	doctor2	Asthma	Combination inhalers	2021-01-20 16:46:33	FeNO test, spirometry	rid1233	Asthma	Theophylline -2 Nos	Avoid Smoke of Any Type, Control Asthma Triggers.
ehrid344	Hospital1	patient344	doctor1	Common Cold	acetaminophen (Tylenol)	2020-12-20 17:19:40	No lab tests exist	rid344	Common Cold	acetaminophen	Wash Your Hands Often, Avoid Touching Your Face, Don't Smoke And Maintain A Healthy Life Style.
ehrid1588	Hospital1	patient1588	doctor1	Diarrhea	Loperamide, Bismuth	2019-01-01 19:54:10	Blood test,stool test,Clostridium difficile toxin test	rid1588	infections, travelers' diarrhea	subsalicylate	Avoid Dairy Products, Spicy Foods And All Citrus Foods And Alcohol.
ehrid1538	Hospital1	patient1538	doctor1	Diarrhea	Loperamide, Bismuth	2021-08-12 05:18:40	Blood test,stool test,Clostridium difficile toxin test	rid1538	infections, travelers' diarrhea	subsalicylate	Avoid Dairy Products, Spicy Foods And All Citrus Foods And Alcohol.
ehrid699	Hospital2	patient699	doctor2	Common Cold	acetaminophen (Tylenol)	2020-05-16 15:07:22	No lab tests exist	rid699	Common Cold	acetaminophen	Wash Your Hands Often, Avoid Touching Your Face, Don't Smoke And Maintain A Healthy Life Style.
ehrid305	Hospital2	patient305	doctor2	Common Cold	acetaminophen (Tylenol)	2022-08-27 15:56:39	No lab tests exist	rid305	Common Cold	acetaminophen	Wash Your Hands Often, Avoid Touching Your Face, Don't Smoke And Maintain A Healthy Life Style.
ehrid1852	Hospital1	patient1852	doctor1	Diarrhea	Loperamide, Bismuth	2019-01-12 19:57:31	Blood test,stool test,Clostridium difficile toxin test	rid1852	infections, travelers' diarrhea	subsalicylate	Avoid Dairy Products, Spicy Foods And All Citrus Foods And Alcohol.
ehrid266	Hospital1	patient266	doctor1	Malaria	Chloroquine phosphate	2020-08-16 11:11:21	Malaria Rapid Diagnostic Test	rid266	Malaria	Artemether/Lumfantrine Treatment	Drink Plenty Of Water, Control Fats Intake, Consume Ripe Papaya, Sweet Lime, Grapes Which Are Rich in Vitamin C
ehrid1711	Hospital2	patient1711	doctor2	Diarrhea	Loperamide, Bismuth	2021-12-25 12:37:17	Blood test,stool test,Clostridium difficile toxin test	rid1711	infections, travelers' diarrhea	subsalicylate	Avoid Dairy Products, Spicy Foods And All Citrus Foods And Alcohol.
ehrid1201	Hospital2	patient1201	doctor2	Diarrhea	Loperamide, Bismuth	2022-09-26 00:54:24	Blood test,stool test,Clostridium difficile toxin test	rid1201	infections, travelers' diarrhea	subsalicylate	Avoid Dairy Products, Spicy Foods And All Citrus Foods And Alcohol.
ehrid1279	Hospital2	patient1279	doctor2	Diarrhea	Loperamide, Bismuth	2019-02-06 15:02:57	Blood test,stool test,Clostridium difficile toxin test	rid1279	infections, travelers' diarrhea	subsalicylate	Avoid Dairy Products, Spicy Foods And All Citrus Foods And Alcohol.
ehrid469	Hospital2	patient469	doctor2	Common Cold	acetaminophen (Tylenol)	2021-11-08 16:37:43	No lab tests exist	rid469	Common Cold	acetaminophen	Wash Your Hands Often, Avoid Touching Your Face, Don't Smoke And Maintain A Healthy Life Style.
ehrid2257	Hospital2	patient2257	doctor2	Heart Disease	Aspirin 75mg,Pain Relieavers	2020-07-05 06:57:29	ECG,Blood Test,CT,MRI	rid2212	Heart Disease and Hypertension	thrombolytics	Regular Physical Activity - Success 30 Minutes A Day, Avoid Saturated And Trans Fat And Fried Foods, As Well As Snacky-Type Foods.
ehrid812	Hospital1	patient812	doctor1	Stroke	Aspirin 75mg,tPA	2019-03-18 16:26:47	CT ,MRI,Echocardiogram	rid812	Stroke	clopidogrel,dipyridamole	Avoid Sugar, Salt, Highly Processed Foods, Saturated And Trans Fats And Fried Foods.
ehrid600	Hospital1	patient600	doctor1	Fever	paracetamol 500mg	2022-11-15 01:55:54	Blood Test and Urine Test	rid600	Fever	Acetaminophen injection	Avoid Caffeine And Alcohol, Stay Hydrated, Have Ample Amount Of Rest.
ehrid1210	Hospital1	patient1210	doctor1	Diarrhea	Loperamide, Bismuth	2020-03-02 06:32:41	Blood test,stool test,Clostridium difficile toxin test	rid1210	infections, travelers' diarrhea	subsalicylate	Avoid Dairy Products, Spicy Foods And All Citrus Foods And Alcohol.
ehrid2060	Hospital1	patient2060	doctor1	Diarrhea	Loperamide, Bismuth	2022-05-01 07:02:15	Blood test,stool test,Clostridium difficile toxin test	rid2060	infections, travelers' diarrhea	subsalicylate	Avoid Dairy Products, Spicy Foods And All Citrus Foods And Alcohol.
ehrid791	Hospital2	patient791	doctor2	Common Cold	acetaminophen (Tylenol)	2021-04-03 21:25:13	No lab tests exist	rid791	Common Cold	acetaminophen	Wash Your Hands Often, Avoid Touching Your Face, Don't Smoke And Maintain A Healthy Life Style.
ehrid2135	Hospital1	patient2135	doctor2	Heart Disease	Aspirin 75mg,Pain Relieavers	2020-04-17 18:27:32	ECG,Blood Test,CT,MRI	rid2197	Heart Disease and Hypertension	thrombolytics	Regular Physical Activity - Success 30 Minutes A Day, Avoid Saturated And Trans Fat And Fried Foods, As Well As Snacky-Type Foods.
ehrid521	Hospital2	patient521	doctor2	Common Cold	acetaminophen (Tylenol)	2020-04-29 22:44:08	No lab tests exist	rid521	Common Cold	acetaminophen	Wash Your Hands Often, Avoid Touching Your Face, Don't Smoke And Maintain A Healthy Life Style.
ehrid135	Hospital2	patient135	doctor2	Asthma	Combination inhalers	2019-01-22 22:53:56	FeNO test, spirometry	rid135	Asthma	Theophylline -2 Nos	Avoid Smoke of Any Type, Control Asthma Triggers.
ehrid1378	Hospital1	patient1378	doctor1	Lung Cancer	Afinitor Disperz	2022-12-28 14:13:19	PET-CT scan,Chest X-ray	rid1378	Lung Cancer	Everolimus	Avoid Smoking Or passive Smoking.
ehrid1994	Hospital1	patient1994	doctor1	Diarrhea	Loperamide, Bismuth	2021-01-31 14:56:45	Blood test,stool test,Clostridium difficile toxin test	rid1994	infections, travelers' diarrhea	subsalicylate	Avoid Dairy Products, Spicy Foods And All Citrus Foods And Alcohol.
ehrid1554	Hospital1	patient1554	doctor1	Stomach Cancer	5-FU (fluorouracil) and leucovorin (folinic acid)	2019-01-31 19:04:11	Upper endoscopy	rid1554	Stomach Cancer	chemotherapy	Choose Low-Fat Diary Products, Protien-Rich Foods.
ehrid2016	Hospital1	patient2016	doctor1	Stomach Cancer	5-FU (fluorouracil) and leucovorin (folinic acid)	2021-11-29 09:44:27	Upper endoscopy	rid2016	Stomach Cancer	chemotherapy	Choose Low-Fat Diary Products, Protien-Rich Foods.
ehrid1448	Hospital1	patient1448	doctor1	Diarrhea	Loperamide, Bismuth	2020-03-08 23:36:50	Blood test,stool test,Clostridium difficile toxin test	rid1448	infections, travelers' diarrhea	subsalicylate	Avoid Dairy Products, Spicy Foods And All Citrus Foods And Alcohol.
ehrid1359	Hospital2	patient1359	doctor2	Asthma	Combination inhalers	2021-04-06 16:59:59	FeNO test, spirometry	rid1359	Asthma	Theophylline -2 Nos	Avoid Smoke of Any Type, Control Asthma Triggers.
ehrid566	Hospital1	patient566	doctor1	Common Cold	acetaminophen (Tylenol)	2020-06-30 22:45:22	No lab tests exist	rid566	Common Cold	acetaminophen	Wash Your Hands Often, Avoid Touching Your Face, Don't Smoke And Maintain A Healthy Life Style.
ehrid1386	Hospital1	patient1386	doctor1	Stomach Cancer	5-FU (fluorouracil) and leucovorin (folinic acid)	2021-11-30 22:13:41	Upper endoscopy	rid1386	Stomach Cancer	chemotherapy	Choose Low-Fat Diary Products, Protien-Rich Foods.
ehrid1375	Hospital2	patient1375	doctor2	Fever	paracetamol 500mg	2019-05-01 13:00:30	Blood Test and Urine Test	rid1375	Fever	Acetaminophen injection	Avoid Caffeine And Alcohol, Stay Hydrated, Have Ample Amount Of Rest.
ehrid1388	Hospital1	patient1388	doctor1	Diarrhea	Loperamide, Bismuth	2021-11-05 05:32:33	Blood test,stool test,Clostridium difficile toxin test	rid1388	infections, travelers' diarrhea	subsalicylate	Avoid Dairy Products, Spicy Foods And All Citrus Foods And Alcohol.
ehrid1584	Hospital1	patient1584	doctor1	HIV/AIDS	antiretroviral therapy (ART)	2019-03-03 00:18:31	Antigen/antibody tests	rid1584	HIV/AIDS	antiretroviral therapy	Do Not Shoot Drugs, Avoid Sex And Do Not Breastfeed And Follow Balanced Diet.
ehrid817	Hospital2	patient817	doctor2	Malaria	Chloroquine phosphate	2022-11-29 01:22:38	Malaria Rapid Diagnostic Test	rid817	Malaria	Artemether/Lumfantrine Treatment	Drink Plenty Of Water, Control Fats Intake, Consume Ripe Papaya, Sweet Lime, Grapes Which Are Rich in Vitamin C
ehrid614	Hospital1	patient614	doctor1	Common Cold	acetaminophen (Tylenol)	2021-01-28 20:13:57	No lab tests exist	rid614	Common Cold	acetaminophen	Wash Your Hands Often, Avoid Touching Your Face, Don't Smoke And Maintain A Healthy Life Style.
ehrid2116	Hospital2	patient2116	doctor1	Heart Disease	Aspirin 75mg,Pain Relieavers	2019-05-04 00:55:45	ECG,Blood Test,CT,MRI	rid2133	Heart Disease and Hypertension	thrombolytics	Regular Physical Activity - Success 30 Minutes A Day, Avoid Saturated And Trans Fat And Fried Foods, As Well As Snacky-Type Foods.
ehrid1724	Hospital1	patient1724	doctor1	Diarrhea	Loperamide, Bismuth	2019-05-13 11:52:06	Blood test,stool test,Clostridium difficile toxin test	rid1724	infections, travelers' diarrhea	subsalicylate	Avoid Dairy Products, Spicy Foods And All Citrus Foods And Alcohol.
ehrid1625	Hospital2	patient1625	doctor2	Fever	paracetamol 500mg	2022-03-23 07:21:25	Blood Test and Urine Test	rid1625	Fever	Acetaminophen injection	Avoid Caffeine And Alcohol, Stay Hydrated, Have Ample Amount Of Rest.
ehrid1295	Hospital2	patient1295	doctor2	Diarrhea	Loperamide, Bismuth	2020-05-10 12:57:36	Blood test,stool test,Clostridium difficile toxin test	rid1295	infections, travelers' diarrhea	subsalicylate	Avoid Dairy Products, Spicy Foods And All Citrus Foods And Alcohol.
ehrid618	Hospital1	patient618	doctor1	Common Cold	acetaminophen (Tylenol)	2019-06-13 11:16:19	No lab tests exist	rid618	Common Cold	acetaminophen	Wash Your Hands Often, Avoid Touching Your Face, Don't Smoke And Maintain A Healthy Life Style.
ehrid1517	Hospital2	patient1517	doctor2	Diarrhea	Loperamide, Bismuth	2021-12-03 00:36:12	Blood test,stool test,Clostridium difficile toxin test	rid1517	infections, travelers' diarrhea	subsalicylate	Avoid Dairy Products, Spicy Foods And All Citrus Foods And Alcohol.
ehrid224	Hospital1	patient224	doctor1	Tuberculosis	Rifater >600mg	2022-02-09 15:55:26	Rapid Sputum Test,T-Spot	rid224	Tuberculosis	Isoniazid INH pills for 6/9 months	Skip Tobacco In All Forms , Don't Consume Alchohol And Limit Caffeinated Drinks.
ehrid409	Hospital2	patient409	doctor2	Common Cold	acetaminophen (Tylenol)	2022-01-27 02:13:44	No lab tests exist	rid409	Common Cold	acetaminophen	Wash Your Hands Often, Avoid Touching Your Face, Don't Smoke And Maintain A Healthy Life Style.
ehrid111	Hospital2	patient111	doctor2	Common Cold	acetaminophen (Tylenol)	2021-06-07 10:24:49	No lab tests exist	rid111	Common Cold	acetaminophen	Wash Your Hands Often, Avoid Touching Your Face, Don't Smoke And Maintain A Healthy Life Style.
ehrid1813	Hospital2	patient1813	doctor2	Diarrhea	Loperamide, Bismuth	2020-07-09 04:15:37	Blood test,stool test,Clostridium difficile toxin test	rid1813	infections, travelers' diarrhea	subsalicylate	Avoid Dairy Products, Spicy Foods And All Citrus Foods And Alcohol.
ehrid1102	Hospital1	patient1102	doctor1	Malaria	Chloroquine phosphate	2020-03-17 04:43:24	Malaria Rapid Diagnostic Test	rid1102	Malaria	Artemether/Lumfantrine Treatment	Drink Plenty Of Water, Control Fats Intake, Consume Ripe Papaya, Sweet Lime, Grapes Which Are Rich in Vitamin C
ehrid642	Hospital1	patient642	doctor1	Common Cold	acetaminophen (Tylenol)	2022-02-19 07:44:13	No lab tests exist	rid642	Common Cold	acetaminophen	Wash Your Hands Often, Avoid Touching Your Face, Don't Smoke And Maintain A Healthy Life Style.
ehrid666	Hospital1	patient666	doctor1	HIV/AIDS	antiretroviral therapy (ART)	2020-08-29 08:16:40	Antigen/antibody tests	rid666	HIV/AIDS	antiretroviral therapy	Do Not Shoot Drugs, Avoid Sex And Do Not Breastfeed And Follow Balanced Diet.
ehrid1254	Hospital1	patient1254	doctor1	Malaria	Chloroquine phosphate	2020-01-31 10:35:05	Malaria Rapid Diagnostic Test	rid1254	Malaria	Artemether/Lumfantrine Treatment	Drink Plenty Of Water, Control Fats Intake, Consume Ripe Papaya, Sweet Lime, Grapes Which Are Rich in Vitamin C
ehrid1736	Hospital1	patient1736	doctor1	Stroke	Aspirin 75mg,tPA	2019-07-04 11:59:58	CT ,MRI,Echocardiogram	rid1736	Stroke	clopidogrel,dipyridamole	Avoid Sugar, Salt, Highly Processed Foods, Saturated And Trans Fats And Fried Foods.
ehrid1827	Hospital2	patient1827	doctor2	Stomach Cancer	5-FU (fluorouracil) and leucovorin (folinic acid)	2022-09-01 05:00:53	Upper endoscopy	rid1827	Stomach Cancer	chemotherapy	Choose Low-Fat Diary Products, Protien-Rich Foods.
ehrid1595	Hospital2	patient1595	doctor2	Diabetes	Metformin 250mg -2 Nos	2022-04-21 10:50:58	HbA1C,Fasting Blood Sugar Test	rid1595	Diabetes	Metformin 750mg -2 Nos	Regular Physical Activity - Success 30 Minutes A Day, Avoid Sugar, Ready To Eat Foods.
ehrid361	Hospital2	patient361	doctor2	Malaria	Chloroquine phosphate	2020-01-11 16:20:50	Malaria Rapid Diagnostic Test	rid361	Malaria	Artemether/Lumfantrine Treatment	Drink Plenty Of Water, Control Fats Intake, Consume Ripe Papaya, Sweet Lime, Grapes Which Are Rich in Vitamin C
ehrid313	Hospital2	patient313	doctor2	Common Cold	acetaminophen (Tylenol)	2020-02-15 07:34:11	No lab tests exist	rid313	Common Cold	acetaminophen	Wash Your Hands Often, Avoid Touching Your Face, Don't Smoke And Maintain A Healthy Life Style.
ehrid1831	Hospital2	patient1831	doctor2	Diarrhea	Loperamide, Bismuth	2020-11-07 07:52:54	Blood test,stool test,Clostridium difficile toxin test	rid1831	infections, travelers' diarrhea	subsalicylate	Avoid Dairy Products, Spicy Foods And All Citrus Foods And Alcohol.
ehrid32	Hospital1	patient32	doctor1	Tuberculosis	Rifater >600mg	2020-05-12 17:47:25	Rapid Sputum Test,T-Spot	rid32	Tuberculosis	Isoniazid INH pills for 6/9 months	Skip Tobacco In All Forms , Don't Consume Alchohol And Limit Caffeinated Drinks.
ehrid2009	Hospital2	patient2009	doctor2	Diarrhea	Loperamide, Bismuth	2020-06-21 19:01:34	Blood test,stool test,Clostridium difficile toxin test	rid2009	infections, travelers' diarrhea	subsalicylate	Avoid Dairy Products, Spicy Foods And All Citrus Foods And Alcohol.
ehrid1993	Hospital2	patient1993	doctor2	Diarrhea	Loperamide, Bismuth	2020-07-15 16:00:46	Blood test,stool test,Clostridium difficile toxin test	rid1993	infections, travelers' diarrhea	subsalicylate	Avoid Dairy Products, Spicy Foods And All Citrus Foods And Alcohol.
ehrid541	Hospital2	patient541	doctor2	Common Cold	acetaminophen (Tylenol)	2021-03-23 09:18:42	No lab tests exist	rid541	Common Cold	acetaminophen	Wash Your Hands Often, Avoid Touching Your Face, Don't Smoke And Maintain A Healthy Life Style.
ehrid1412	Hospital1	patient1412	doctor1	Diarrhea	Loperamide, Bismuth	2020-02-11 05:42:39	Blood test,stool test,Clostridium difficile toxin test	rid1412	infections, travelers' diarrhea	subsalicylate	Avoid Dairy Products, Spicy Foods And All Citrus Foods And Alcohol.
ehrid924	Hospital1	patient924	doctor1	Stomach Cancer	5-FU (fluorouracil) and leucovorin (folinic acid)	2022-05-13 15:25:04	Upper endoscopy	rid924	Stomach Cancer	chemotherapy	Choose Low-Fat Diary Products, Protien-Rich Foods.
ehrid1135	Hospital2	patient1135	doctor2	Diarrhea	Loperamide, Bismuth	2022-04-11 08:59:11	Blood test,stool test,Clostridium difficile toxin test	rid1135	infections, travelers' diarrhea	subsalicylate	Avoid Dairy Products, Spicy Foods And All Citrus Foods And Alcohol.
ehrid127	Hospital2	patient127	doctor2	Common Cold	acetaminophen (Tylenol)	2021-04-15 18:16:45	No lab tests exist	rid127	Common Cold	acetaminophen	Wash Your Hands Often, Avoid Touching Your Face, Don't Smoke And Maintain A Healthy Life Style.
ehrid232	Hospital1	patient232	doctor1	Common Cold	acetaminophen (Tylenol)	2021-03-11 14:49:50	No lab tests exist	rid232	Common Cold	acetaminophen	Wash Your Hands Often, Avoid Touching Your Face, Don't Smoke And Maintain A Healthy Life Style.
ehrid404	Hospital1	patient404	doctor1	Common Cold	acetaminophen (Tylenol)	2021-10-10 22:36:48	No lab tests exist	rid404	Common Cold	acetaminophen	Wash Your Hands Often, Avoid Touching Your Face, Don't Smoke And Maintain A Healthy Life Style.
ehrid2041	Hospital2	patient2041	doctor2	Lung Cancer	Afinitor Disperz	2020-11-26 11:57:44	PET-CT scan,Chest X-ray	rid2041	Lung Cancer	Everolimus	Avoid Smoking Or passive Smoking.
ehrid698	Hospital1	patient698	doctor1	Common Cold	acetaminophen (Tylenol)	2022-12-02 18:43:23	No lab tests exist	rid698	Common Cold	acetaminophen	Wash Your Hands Often, Avoid Touching Your Face, Don't Smoke And Maintain A Healthy Life Style.
ehrid1998	Hospital1	patient1998	doctor1	HIV/AIDS	antiretroviral therapy (ART)	2019-11-20 01:50:58	Antigen/antibody tests	rid1998	HIV/AIDS	antiretroviral therapy	Do Not Shoot Drugs, Avoid Sex And Do Not Breastfeed And Follow Balanced Diet.
ehrid375	Hospital2	patient375	doctor2	Fever	paracetamol 500mg	2020-08-11 01:18:44	Blood Test and Urine Test	rid375	Fever	Acetaminophen injection	Avoid Caffeine And Alcohol, Stay Hydrated, Have Ample Amount Of Rest.
ehrid625	Hospital2	patient625	doctor2	Fever	paracetamol 500mg	2020-05-11 16:30:37	Blood Test and Urine Test	rid625	Fever	Acetaminophen injection	Avoid Caffeine And Alcohol, Stay Hydrated, Have Ample Amount Of Rest.
ehrid1159	Hospital2	patient1159	doctor2	Malaria	Chloroquine phosphate	2021-06-24 22:12:36	Malaria Rapid Diagnostic Test	rid1159	Malaria	Artemether/Lumfantrine Treatment	Drink Plenty Of Water, Control Fats Intake, Consume Ripe Papaya, Sweet Lime, Grapes Which Are Rich in Vitamin C
ehrid1340	Hospital1	patient1340	doctor1	Diarrhea	Loperamide, Bismuth	2022-11-04 19:31:43	Blood test,stool test,Clostridium difficile toxin test	rid1340	infections, travelers' diarrhea	subsalicylate	Avoid Dairy Products, Spicy Foods And All Citrus Foods And Alcohol.
ehrid1842	Hospital1	patient1842	doctor1	Diarrhea	Loperamide, Bismuth	2020-01-11 04:34:26	Blood test,stool test,Clostridium difficile toxin test	rid1842	infections, travelers' diarrhea	subsalicylate	Avoid Dairy Products, Spicy Foods And All Citrus Foods And Alcohol.
ehrid1235	Hospital2	patient1235	doctor2	Malaria	Chloroquine phosphate	2020-10-20 10:15:49	Malaria Rapid Diagnostic Test	rid1235	Malaria	Artemether/Lumfantrine Treatment	Drink Plenty Of Water, Control Fats Intake, Consume Ripe Papaya, Sweet Lime, Grapes Which Are Rich in Vitamin C
ehrid1767	Hospital2	patient1767	doctor2	Malaria	Chloroquine phosphate	2022-09-10 20:28:07	Malaria Rapid Diagnostic Test	rid1767	Malaria	Artemether/Lumfantrine Treatment	Drink Plenty Of Water, Control Fats Intake, Consume Ripe Papaya, Sweet Lime, Grapes Which Are Rich in Vitamin C
ehrid339	Hospital2	patient339	doctor2	Common Cold	acetaminophen (Tylenol)	2019-10-21 07:00:09	No lab tests exist	rid339	Common Cold	acetaminophen	Wash Your Hands Often, Avoid Touching Your Face, Don't Smoke And Maintain A Healthy Life Style.
ehrid1260	Hospital1	patient1260	doctor1	Stomach Cancer	5-FU (fluorouracil) and leucovorin (folinic acid)	2019-12-19 01:15:57	Upper endoscopy	rid1260	Stomach Cancer	chemotherapy	Choose Low-Fat Diary Products, Protien-Rich Foods.
ehrid1021	Hospital2	patient1021	doctor2	Diarrhea	Loperamide, Bismuth	2020-03-18 22:24:23	Blood test,stool test,Clostridium difficile toxin test	rid1021	infections, travelers' diarrhea	subsalicylate	Avoid Dairy Products, Spicy Foods And All Citrus Foods And Alcohol.
ehrid1926	Hospital1	patient1926	doctor1	HIV/AIDS	antiretroviral therapy (ART)	2022-06-18 14:29:22	Antigen/antibody tests	rid1926	HIV/AIDS	antiretroviral therapy	Do Not Shoot Drugs, Avoid Sex And Do Not Breastfeed And Follow Balanced Diet.
ehrid1639	Hospital2	patient1639	doctor2	Diabetes	Metformin 250mg -2 Nos	2019-08-14 23:00:37	HbA1C,Fasting Blood Sugar Test	rid1639	Diabetes	Metformin 750mg -2 Nos	Regular Physical Activity - Success 30 Minutes A Day, Avoid Sugar, Ready To Eat Foods.
ehrid2142	Hospital2	patient2142	doctor1	Heart Disease	Aspirin 75mg,Pain Relieavers	2020-05-02 21:36:37	ECG,Blood Test,CT,MRI	rid2103	Heart Disease and Hypertension	thrombolytics	Regular Physical Activity - Success 30 Minutes A Day, Avoid Saturated And Trans Fat And Fried Foods, As Well As Snacky-Type Foods.
ehrid2132	Hospital1	patient2132	doctor1	Heart Disease	Aspirin 75mg,Pain Relieavers	2019-12-09 15:15:54	ECG,Blood Test,CT,MRI	rid2215	Heart Disease and Hypertension	thrombolytics	Regular Physical Activity - Success 30 Minutes A Day, Avoid Saturated And Trans Fat And Fried Foods, As Well As Snacky-Type Foods.
ehrid1571	Hospital2	patient1571	doctor2	Diarrhea	Loperamide, Bismuth	2022-02-11 19:36:07	Blood test,stool test,Clostridium difficile toxin test	rid1571	infections, travelers' diarrhea	subsalicylate	Avoid Dairy Products, Spicy Foods And All Citrus Foods And Alcohol.
ehrid348	Hospital1	patient348	doctor1	Cirrhosis	ursodiol	2019-12-31 12:08:18	liver biopsy	rid348	Cirrhosis	ursodiol	Eat Foods Like Lean Protein Poultry Or Fish, Strictly Avoid Alcohol.
ehrid30	Hospital1	patient30	doctor1	Diarrhea	Loperamide, Bismuth	2021-04-26 04:10:53	Blood test,stool test,Clostridium difficile toxin test	rid30	infections, travelers' diarrhea	subsalicylate	Avoid Dairy Products, Spicy Foods And All Citrus Foods And Alcohol.
ehrid998	Hospital1	patient998	doctor1	Common Cold	acetaminophen (Tylenol)	2021-03-12 09:33:00	No lab tests exist	rid998	Common Cold	acetaminophen	Wash Your Hands Often, Avoid Touching Your Face, Don't Smoke And Maintain A Healthy Life Style.
ehrid2229	Hospital1	patient2229	doctor2	Heart Disease	Aspirin 75mg,Pain Relieavers	2021-08-26 06:25:26	ECG,Blood Test,CT,MRI	rid2111	Heart Disease and Hypertension	thrombolytics	Regular Physical Activity - Success 30 Minutes A Day, Avoid Saturated And Trans Fat And Fried Foods, As Well As Snacky-Type Foods.
ehrid1421	Hospital2	patient1421	doctor2	Diarrhea	Loperamide, Bismuth	2020-07-23 16:28:20	Blood test,stool test,Clostridium difficile toxin test	rid1421	infections, travelers' diarrhea	subsalicylate	Avoid Dairy Products, Spicy Foods And All Citrus Foods And Alcohol.
ehrid686	Hospital1	patient686	doctor1	Stroke	Aspirin 75mg,tPA	2022-03-27 08:04:08	CT ,MRI,Echocardiogram	rid686	Stroke	clopidogrel,dipyridamole	Avoid Sugar, Salt, Highly Processed Foods, Saturated And Trans Fats And Fried Foods.
ehrid1155	Hospital2	patient1155	doctor2	Stomach Cancer	5-FU (fluorouracil) and leucovorin (folinic acid)	2022-02-26 04:03:24	Upper endoscopy	rid1155	Stomach Cancer	chemotherapy	Choose Low-Fat Diary Products, Protien-Rich Foods.
ehrid338	Hospital1	patient338	doctor1	Lung Cancer	Afinitor Disperz	2021-08-27 09:27:34	PET-CT scan,Chest X-ray	rid338	Lung Cancer	Everolimus	Avoid Smoking Or passive Smoking.
ehrid543	Hospital2	patient543	doctor2	Common Cold	acetaminophen (Tylenol)	2022-02-05 11:10:57	No lab tests exist	rid543	Common Cold	acetaminophen	Wash Your Hands Often, Avoid Touching Your Face, Don't Smoke And Maintain A Healthy Life Style.
ehrid2214	Hospital1	patient2214	doctor1	Heart Disease	Aspirin 75mg,Pain Relieavers	2022-06-13 17:37:22	ECG,Blood Test,CT,MRI	rid2268	Heart Disease and Hypertension	thrombolytics	Regular Physical Activity - Success 30 Minutes A Day, Avoid Saturated And Trans Fat And Fried Foods, As Well As Snacky-Type Foods.
ehrid2054	Hospital1	patient2054	doctor1	Lung Cancer	Afinitor Disperz	2020-02-06 01:50:06	PET-CT scan,Chest X-ray	rid2054	Lung Cancer	Everolimus	Avoid Smoking Or passive Smoking.
ehrid693	Hospital2	patient693	doctor2	Stomach Cancer	5-FU (fluorouracil) and leucovorin (folinic acid)	2021-07-30 17:17:42	Upper endoscopy	rid693	Stomach Cancer	chemotherapy	Choose Low-Fat Diary Products, Protien-Rich Foods.
ehrid588	Hospital1	patient588	doctor1	Stomach Cancer	5-FU (fluorouracil) and leucovorin (folinic acid)	2022-12-20 04:20:00	Upper endoscopy	rid588	Stomach Cancer	chemotherapy	Choose Low-Fat Diary Products, Protien-Rich Foods.
ehrid756	Hospital1	patient756	doctor1	Stomach Cancer	5-FU (fluorouracil) and leucovorin (folinic acid)	2019-07-04 05:23:55	Upper endoscopy	rid756	Stomach Cancer	chemotherapy	Choose Low-Fat Diary Products, Protien-Rich Foods.
ehrid523	Hospital2	patient523	doctor2	Common Cold	acetaminophen (Tylenol)	2020-06-05 00:49:53	No lab tests exist	rid523	Common Cold	acetaminophen	Wash Your Hands Often, Avoid Touching Your Face, Don't Smoke And Maintain A Healthy Life Style.
ehrid923	Hospital2	patient923	doctor2	Lung Cancer	Afinitor Disperz	2022-05-10 11:54:19	PET-CT scan,Chest X-ray	rid923	Lung Cancer	Everolimus	Avoid Smoking Or passive Smoking.
ehrid1541	Hospital2	patient1541	doctor2	Common Cold	acetaminophen (Tylenol)	2019-09-05 01:16:30	No lab tests exist	rid1541	Common Cold	acetaminophen	Wash Your Hands Often, Avoid Touching Your Face, Don't Smoke And Maintain A Healthy Life Style.
ehrid534	Hospital1	patient534	doctor1	Common Cold	acetaminophen (Tylenol)	2020-06-24 10:34:29	No lab tests exist	rid534	Common Cold	acetaminophen	Wash Your Hands Often, Avoid Touching Your Face, Don't Smoke And Maintain A Healthy Life Style.
ehrid747	Hospital2	patient747	doctor2	Asthma	Combination inhalers	2019-11-21 03:28:05	FeNO test, spirometry	rid747	Asthma	Theophylline -2 Nos	Avoid Smoke of Any Type, Control Asthma Triggers.
ehrid57	Hospital2	patient57	doctor2	Malaria	Chloroquine phosphate	2021-03-08 13:19:15	Malaria Rapid Diagnostic Test	rid57	Malaria	Artemether/Lumfantrine Treatment	Drink Plenty Of Water, Control Fats Intake, Consume Ripe Papaya, Sweet Lime, Grapes Which Are Rich in Vitamin C
ehrid1946	Hospital1	patient1946	doctor1	Stroke	Aspirin 75mg,tPA	2020-08-03 18:26:28	CT ,MRI,Echocardiogram	rid1946	Stroke	clopidogrel,dipyridamole	Avoid Sugar, Salt, Highly Processed Foods, Saturated And Trans Fats And Fried Foods.
ehrid110	Hospital1	patient110	doctor1	Diarrhea	Loperamide, Bismuth	2019-10-05 03:16:42	Blood test,stool test,Clostridium difficile toxin test	rid110	infections, travelers' diarrhea	subsalicylate	Avoid Dairy Products, Spicy Foods And All Citrus Foods And Alcohol.
ehrid1245	Hospital2	patient1245	doctor2	Alzheimer	Galantamine, rivastigmine	2019-10-02 02:42:38	MRI,CT	rid1245	Alzheimer	donepezil	Follow Mind Diet, Should Have <4 Servings A Week Of Red Meat, Less Than A Tablespoon Of Butter A Day.
ehrid1004	Hospital1	patient1004	doctor1	Diarrhea	Loperamide, Bismuth	2019-08-16 08:21:17	Blood test,stool test,Clostridium difficile toxin test	rid1004	infections, travelers' diarrhea	subsalicylate	Avoid Dairy Products, Spicy Foods And All Citrus Foods And Alcohol.
ehrid262	Hospital1	patient262	doctor1	Common Cold	acetaminophen (Tylenol)	2019-03-23 03:28:46	No lab tests exist	rid262	Common Cold	acetaminophen	Wash Your Hands Often, Avoid Touching Your Face, Don't Smoke And Maintain A Healthy Life Style.
ehrid1779	Hospital2	patient1779	doctor2	Diarrhea	Loperamide, Bismuth	2022-06-10 21:36:23	Blood test,stool test,Clostridium difficile toxin test	rid1779	infections, travelers' diarrhea	subsalicylate	Avoid Dairy Products, Spicy Foods And All Citrus Foods And Alcohol.
ehrid1651	Hospital2	patient1651	doctor2	Lung Cancer	Afinitor Disperz	2020-08-05 16:19:31	PET-CT scan,Chest X-ray	rid1651	Lung Cancer	Everolimus	Avoid Smoking Or passive Smoking.
ehrid1497	Hospital2	patient1497	doctor2	Diarrhea	Loperamide, Bismuth	2021-12-08 15:38:26	Blood test,stool test,Clostridium difficile toxin test	rid1497	infections, travelers' diarrhea	subsalicylate	Avoid Dairy Products, Spicy Foods And All Citrus Foods And Alcohol.
ehrid746	Hospital1	patient746	doctor1	Common Cold	acetaminophen (Tylenol)	2022-04-14 14:40:39	No lab tests exist	rid746	Common Cold	acetaminophen	Wash Your Hands Often, Avoid Touching Your Face, Don't Smoke And Maintain A Healthy Life Style.
ehrid1817	Hospital2	patient1817	doctor2	Common Cold	acetaminophen (Tylenol)	2020-09-03 13:11:49	No lab tests exist	rid1817	Common Cold	acetaminophen	Wash Your Hands Often, Avoid Touching Your Face, Don't Smoke And Maintain A Healthy Life Style.
ehrid418	Hospital1	patient418	doctor1	Malaria	Chloroquine phosphate	2022-07-22 08:13:51	Malaria Rapid Diagnostic Test	rid418	Malaria	Artemether/Lumfantrine Treatment	Drink Plenty Of Water, Control Fats Intake, Consume Ripe Papaya, Sweet Lime, Grapes Which Are Rich in Vitamin C
ehrid1989	Hospital2	patient1989	doctor2	Asthma	Combination inhalers	2022-06-11 20:40:11	FeNO test, spirometry	rid1989	Asthma	Theophylline -2 Nos	Avoid Smoke of Any Type, Control Asthma Triggers.
ehrid444	Hospital1	patient444	doctor1	Cirrhosis	ursodiol	2019-10-05 05:45:14	liver biopsy	rid444	Cirrhosis	ursodiol	Eat Foods Like Lean Protein Poultry Or Fish, Strictly Avoid Alcohol.
ehrid943	Hospital2	patient943	doctor2	Common Cold	acetaminophen (Tylenol)	2022-12-21 10:46:53	No lab tests exist	rid943	Common Cold	acetaminophen	Wash Your Hands Often, Avoid Touching Your Face, Don't Smoke And Maintain A Healthy Life Style.
ehrid1069	Hospital2	patient1069	doctor2	Diarrhea	Loperamide, Bismuth	2021-02-22 06:36:04	Blood test,stool test,Clostridium difficile toxin test	rid1069	infections, travelers' diarrhea	subsalicylate	Avoid Dairy Products, Spicy Foods And All Citrus Foods And Alcohol.
ehrid1417	Hospital2	patient1417	doctor2	Lung Cancer	Afinitor Disperz	2020-02-03 23:05:30	PET-CT scan,Chest X-ray	rid1417	Lung Cancer	Everolimus	Avoid Smoking Or passive Smoking.
ehrid1403	Hospital2	patient1403	doctor2	Common Cold	acetaminophen (Tylenol)	2019-09-05 16:49:14	No lab tests exist	rid1403	Common Cold	acetaminophen	Wash Your Hands Often, Avoid Touching Your Face, Don't Smoke And Maintain A Healthy Life Style.
ehrid1513	Hospital2	patient1513	doctor2	Heart Disease	Aspirin 75mg,Pain Relieavers	2019-01-24 02:45:16	ECG,Blood Test,CT,MRI	rid1513	Heart Disease	thrombolytics	Regular Physical Activity - Success 30 Minutes A Day, Avoid Saturated And Trans Fat And Fried Foods, As Well As Snacky-Type Foods.
ehrid2100	Hospital2	patient2100	doctor1	Heart Disease	Aspirin 75mg,Pain Relieavers	2019-08-24 02:16:59	ECG,Blood Test,CT,MRI	rid2257	Heart Disease and Hypertension	thrombolytics	Regular Physical Activity - Success 30 Minutes A Day, Avoid Saturated And Trans Fat And Fried Foods, As Well As Snacky-Type Foods.
ehrid980	Hospital1	patient980	doctor1	Diarrhea	Loperamide, Bismuth	2021-08-30 05:21:57	Blood test,stool test,Clostridium difficile toxin test	rid980	infections, travelers' diarrhea	subsalicylate	Avoid Dairy Products, Spicy Foods And All Citrus Foods And Alcohol.
ehrid886	Hospital1	patient886	doctor1	Common Cold	acetaminophen (Tylenol)	2022-06-22 07:54:53	No lab tests exist	rid886	Common Cold	acetaminophen	Wash Your Hands Often, Avoid Touching Your Face, Don't Smoke And Maintain A Healthy Life Style.
ehrid1077	Hospital2	patient1077	doctor2	Diarrhea	Loperamide, Bismuth	2022-10-20 23:05:31	Blood test,stool test,Clostridium difficile toxin test	rid1077	infections, travelers' diarrhea	subsalicylate	Avoid Dairy Products, Spicy Foods And All Citrus Foods And Alcohol.
ehrid547	Hospital2	patient547	doctor2	Common Cold	acetaminophen (Tylenol)	2021-03-25 01:35:16	No lab tests exist	rid547	Common Cold	acetaminophen	Wash Your Hands Often, Avoid Touching Your Face, Don't Smoke And Maintain A Healthy Life Style.
ehrid1811	Hospital2	patient1811	doctor2	Diarrhea	Loperamide, Bismuth	2022-03-04 15:07:47	Blood test,stool test,Clostridium difficile toxin test	rid1811	infections, travelers' diarrhea	subsalicylate	Avoid Dairy Products, Spicy Foods And All Citrus Foods And Alcohol.
ehrid1567	Hospital2	patient1567	doctor2	Diarrhea	Loperamide, Bismuth	2019-01-29 03:49:14	Blood test,stool test,Clostridium difficile toxin test	rid1567	infections, travelers' diarrhea	subsalicylate	Avoid Dairy Products, Spicy Foods And All Citrus Foods And Alcohol.
ehrid2249	Hospital2	patient2249	doctor2	Heart Disease	Aspirin 75mg,Pain Relieavers	2021-09-07 18:26:45	ECG,Blood Test,CT,MRI	rid2211	Heart Disease and Hypertension	thrombolytics	Regular Physical Activity - Success 30 Minutes A Day, Avoid Saturated And Trans Fat And Fried Foods, As Well As Snacky-Type Foods.
ehrid2141	Hospital1	patient2141	doctor2	Heart Disease	Aspirin 75mg,Pain Relieavers	2022-12-24 00:15:24	ECG,Blood Test,CT,MRI	rid2254	Heart Disease and Hypertension	thrombolytics	Regular Physical Activity - Success 30 Minutes A Day, Avoid Saturated And Trans Fat And Fried Foods, As Well As Snacky-Type Foods.
ehrid764	Hospital1	patient764	doctor1	Common Cold	acetaminophen (Tylenol)	2021-01-11 05:10:41	No lab tests exist	rid764	Common Cold	acetaminophen	Wash Your Hands Often, Avoid Touching Your Face, Don't Smoke And Maintain A Healthy Life Style.
ehrid28	Hospital1	patient28	doctor1	Stroke	Aspirin 75mg,tPA	2021-11-16 06:03:02	CT ,MRI,Echocardiogram	rid28	Stroke	clopidogrel,dipyridamole	Avoid Sugar, Salt, Highly Processed Foods, Saturated And Trans Fats And Fried Foods.
ehrid1935	Hospital2	patient1935	doctor2	Asthma	Combination inhalers	2022-02-05 13:48:29	FeNO test, spirometry	rid1935	Asthma	Theophylline -2 Nos	Avoid Smoke of Any Type, Control Asthma Triggers.
ehrid1963	Hospital2	patient1963	doctor2	Lung Cancer	Afinitor Disperz	2021-03-20 02:28:12	PET-CT scan,Chest X-ray	rid1963	Lung Cancer	Everolimus	Avoid Smoking Or passive Smoking.
ehrid542	Hospital1	patient542	doctor1	Common Cold	acetaminophen (Tylenol)	2020-12-06 07:24:33	No lab tests exist	rid542	Common Cold	acetaminophen	Wash Your Hands Often, Avoid Touching Your Face, Don't Smoke And Maintain A Healthy Life Style.
ehrid2096	Hospital1	patient2096	doctor1	Tuberculosis	Rifater >600mg	2021-01-27 23:39:36	Rapid Sputum Test,T-Spot	rid2096	Tuberculosis	Isoniazid INH pills for 6/9 months	Skip Tobacco In All Forms , Don't Consume Alchohol And Limit Caffeinated Drinks.
ehrid1930	Hospital1	patient1930	doctor1	Diarrhea	Loperamide, Bismuth	2020-11-15 22:25:42	Blood test,stool test,Clostridium difficile toxin test	rid1930	infections, travelers' diarrhea	subsalicylate	Avoid Dairy Products, Spicy Foods And All Citrus Foods And Alcohol.
ehrid1391	Hospital2	patient1391	doctor2	Lung Cancer	Afinitor Disperz	2021-10-26 22:26:41	PET-CT scan,Chest X-ray	rid1391	Lung Cancer	Everolimus	Avoid Smoking Or passive Smoking.
ehrid1252	Hospital1	patient1252	doctor1	Diarrhea	Loperamide, Bismuth	2020-08-13 13:51:50	Blood test,stool test,Clostridium difficile toxin test	rid1252	infections, travelers' diarrhea	subsalicylate	Avoid Dairy Products, Spicy Foods And All Citrus Foods And Alcohol.
ehrid1578	Hospital1	patient1578	doctor1	Diarrhea	Loperamide, Bismuth	2021-05-17 15:02:34	Blood test,stool test,Clostridium difficile toxin test	rid1578	infections, travelers' diarrhea	subsalicylate	Avoid Dairy Products, Spicy Foods And All Citrus Foods And Alcohol.
ehrid450	Hospital1	patient450	doctor1	Fever	paracetamol 500mg	2022-07-05 22:03:02	Blood Test and Urine Test	rid450	Fever	Acetaminophen injection	Avoid Caffeine And Alcohol, Stay Hydrated, Have Ample Amount Of Rest.
ehrid621	Hospital2	patient621	doctor2	Common Cold	acetaminophen (Tylenol)	2021-01-25 08:27:38	No lab tests exist	rid621	Common Cold	acetaminophen	Wash Your Hands Often, Avoid Touching Your Face, Don't Smoke And Maintain A Healthy Life Style.
ehrid1766	Hospital1	patient1766	doctor1	Diarrhea	Loperamide, Bismuth	2020-03-02 09:18:21	Blood test,stool test,Clostridium difficile toxin test	rid1766	infections, travelers' diarrhea	subsalicylate	Avoid Dairy Products, Spicy Foods And All Citrus Foods And Alcohol.
ehrid1212	Hospital1	patient1212	doctor1	Cirrhosis	ursodiol	2022-08-01 04:45:59	liver biopsy	rid1212	Cirrhosis	ursodiol	Eat Foods Like Lean Protein Poultry Or Fish, Strictly Avoid Alcohol.
ehrid297	Hospital2	patient297	doctor2	Asthma	Combination inhalers	2022-07-02 04:01:31	FeNO test, spirometry	rid297	Asthma	Theophylline -2 Nos	Avoid Smoke of Any Type, Control Asthma Triggers.
ehrid1006	Hospital1	patient1006	doctor1	Diarrhea	Loperamide, Bismuth	2022-12-06 05:28:06	Blood test,stool test,Clostridium difficile toxin test	rid1006	infections, travelers' diarrhea	subsalicylate	Avoid Dairy Products, Spicy Foods And All Citrus Foods And Alcohol.
ehrid546	Hospital1	patient546	doctor1	Stomach Cancer	5-FU (fluorouracil) and leucovorin (folinic acid)	2022-11-14 03:06:21	Upper endoscopy	rid546	Stomach Cancer	chemotherapy	Choose Low-Fat Diary Products, Protien-Rich Foods.
ehrid1116	Hospital1	patient1116	doctor1	HIV/AIDS	antiretroviral therapy (ART)	2021-12-10 20:14:34	Antigen/antibody tests	rid1116	HIV/AIDS	antiretroviral therapy	Do Not Shoot Drugs, Avoid Sex And Do Not Breastfeed And Follow Balanced Diet.
ehrid1076	Hospital1	patient1076	doctor1	Diarrhea	Loperamide, Bismuth	2021-03-17 05:18:54	Blood test,stool test,Clostridium difficile toxin test	rid1076	infections, travelers' diarrhea	subsalicylate	Avoid Dairy Products, Spicy Foods And All Citrus Foods And Alcohol.
ehrid1800	Hospital1	patient1800	doctor1	Fever	paracetamol 500mg	2022-10-12 13:02:58	Blood Test and Urine Test	rid1800	Fever	Acetaminophen injection	Avoid Caffeine And Alcohol, Stay Hydrated, Have Ample Amount Of Rest.
ehrid1213	Hospital2	patient1213	doctor2	Diarrhea	Loperamide, Bismuth	2019-07-10 19:41:02	Blood test,stool test,Clostridium difficile toxin test	rid1213	infections, travelers' diarrhea	subsalicylate	Avoid Dairy Products, Spicy Foods And All Citrus Foods And Alcohol.
ehrid1234	Hospital1	patient1234	doctor1	Diarrhea	Loperamide, Bismuth	2022-10-10 00:36:18	Blood test,stool test,Clostridium difficile toxin test	rid1234	infections, travelers' diarrhea	subsalicylate	Avoid Dairy Products, Spicy Foods And All Citrus Foods And Alcohol.
ehrid1721	Hospital2	patient1721	doctor2	Diarrhea	Loperamide, Bismuth	2022-07-09 02:00:24	Blood test,stool test,Clostridium difficile toxin test	rid1721	infections, travelers' diarrhea	subsalicylate	Avoid Dairy Products, Spicy Foods And All Citrus Foods And Alcohol.
ehrid1755	Hospital2	patient1755	doctor2	Asthma	Combination inhalers	2021-03-31 06:43:22	FeNO test, spirometry	rid1755	Asthma	Theophylline -2 Nos	Avoid Smoke of Any Type, Control Asthma Triggers.
ehrid908	Hospital1	patient908	doctor1	Common Cold	acetaminophen (Tylenol)	2021-03-28 00:08:31	No lab tests exist	rid908	Common Cold	acetaminophen	Wash Your Hands Often, Avoid Touching Your Face, Don't Smoke And Maintain A Healthy Life Style.
ehrid1103	Hospital2	patient1103	doctor2	Diarrhea	Loperamide, Bismuth	2020-09-14 22:01:37	Blood test,stool test,Clostridium difficile toxin test	rid1103	infections, travelers' diarrhea	subsalicylate	Avoid Dairy Products, Spicy Foods And All Citrus Foods And Alcohol.
ehrid1862	Hospital1	patient1862	doctor1	Malaria	Chloroquine phosphate	2022-10-27 18:28:10	Malaria Rapid Diagnostic Test	rid1862	Malaria	Artemether/Lumfantrine Treatment	Drink Plenty Of Water, Control Fats Intake, Consume Ripe Papaya, Sweet Lime, Grapes Which Are Rich in Vitamin C
ehrid1987	Hospital2	patient1987	doctor2	Diarrhea	Loperamide, Bismuth	2019-01-10 16:45:48	Blood test,stool test,Clostridium difficile toxin test	rid1987	infections, travelers' diarrhea	subsalicylate	Avoid Dairy Products, Spicy Foods And All Citrus Foods And Alcohol.
ehrid1467	Hospital2	patient1467	doctor2	Asthma	Combination inhalers	2021-01-18 05:58:03	FeNO test, spirometry	rid1467	Asthma	Theophylline -2 Nos	Avoid Smoke of Any Type, Control Asthma Triggers.
ehrid68	Hospital1	patient68	doctor1	Heart Disease	Aspirin 75mg,Pain Relieavers	2020-10-24 20:16:23	ECG,Blood Test,CT,MRI	rid68	Heart Disease and Hypertension	thrombolytics	Regular Physical Activity - Success 30 Minutes A Day, Avoid Saturated And Trans Fat And Fried Foods, As Well As Snacky-Type Foods.
ehrid1440	Hospital1	patient1440	doctor1	HIV/AIDS	antiretroviral therapy (ART)	2020-12-09 05:46:44	Antigen/antibody tests	rid1440	HIV/AIDS	antiretroviral therapy	Do Not Shoot Drugs, Avoid Sex And Do Not Breastfeed And Follow Balanced Diet.
ehrid1402	Hospital1	patient1402	doctor1	Diarrhea	Loperamide, Bismuth	2022-07-18 08:08:47	Blood test,stool test,Clostridium difficile toxin test	rid1402	infections, travelers' diarrhea	subsalicylate	Avoid Dairy Products, Spicy Foods And All Citrus Foods And Alcohol.
ehrid1612	Hospital1	patient1612	doctor1	Lung Cancer	Afinitor Disperz	2019-01-17 10:58:53	PET-CT scan,Chest X-ray	rid1612	Lung Cancer	Everolimus	Avoid Smoking Or passive Smoking.
ehrid522	Hospital1	patient522	doctor1	HIV/AIDS	antiretroviral therapy (ART)	2021-08-13 20:51:59	Antigen/antibody tests	rid522	HIV/AIDS	antiretroviral therapy	Do Not Shoot Drugs, Avoid Sex And Do Not Breastfeed And Follow Balanced Diet.
ehrid1822	Hospital1	patient1822	doctor1	Diarrhea	Loperamide, Bismuth	2022-03-20 19:37:46	Blood test,stool test,Clostridium difficile toxin test	rid1822	infections, travelers' diarrhea	subsalicylate	Avoid Dairy Products, Spicy Foods And All Citrus Foods And Alcohol.
ehrid1207	Hospital2	patient1207	doctor2	Heart Disease	Aspirin 75mg,Pain Relieavers	2019-10-13 10:22:29	ECG,Blood Test,CT,MRI	rid1207	Heart Disease	thrombolytics	Regular Physical Activity - Success 30 Minutes A Day, Avoid Saturated And Trans Fat And Fried Foods, As Well As Snacky-Type Foods.
ehrid1202	Hospital1	patient1202	doctor1	Diarrhea	Loperamide, Bismuth	2020-02-25 21:50:24	Blood test,stool test,Clostridium difficile toxin test	rid1202	infections, travelers' diarrhea	subsalicylate	Avoid Dairy Products, Spicy Foods And All Citrus Foods And Alcohol.
ehrid1971	Hospital2	patient1971	doctor2	Asthma	Combination inhalers	2020-11-05 02:39:13	FeNO test, spirometry	rid1971	Asthma	Theophylline -2 Nos	Avoid Smoke of Any Type, Control Asthma Triggers.
ehrid607	Hospital2	patient607	doctor2	Common Cold	acetaminophen (Tylenol)	2021-05-20 16:21:58	No lab tests exist	rid607	Common Cold	acetaminophen	Wash Your Hands Often, Avoid Touching Your Face, Don't Smoke And Maintain A Healthy Life Style.
ehrid498	Hospital1	patient498	doctor1	Common Cold	acetaminophen (Tylenol)	2019-11-30 13:58:39	No lab tests exist	rid498	Common Cold	acetaminophen	Wash Your Hands Often, Avoid Touching Your Face, Don't Smoke And Maintain A Healthy Life Style.
ehrid1191	Hospital2	patient1191	doctor2	Diarrhea	Loperamide, Bismuth	2021-07-11 16:10:08	Blood test,stool test,Clostridium difficile toxin test	rid1191	infections, travelers' diarrhea	subsalicylate	Avoid Dairy Products, Spicy Foods And All Citrus Foods And Alcohol.
ehrid2151	Hospital2	patient2151	doctor2	Heart Disease	Aspirin 75mg,Pain Relieavers	2020-05-10 09:03:15	ECG,Blood Test,CT,MRI	rid2203	Heart Disease and Hypertension	thrombolytics	Regular Physical Activity - Success 30 Minutes A Day, Avoid Saturated And Trans Fat And Fried Foods, As Well As Snacky-Type Foods.
ehrid1657	Hospital2	patient1657	doctor2	Diarrhea	Loperamide, Bismuth	2020-01-06 22:54:12	Blood test,stool test,Clostridium difficile toxin test	rid1657	infections, travelers' diarrhea	subsalicylate	Avoid Dairy Products, Spicy Foods And All Citrus Foods And Alcohol.
ehrid501	Hospital2	patient501	doctor2	Common Cold	acetaminophen (Tylenol)	2022-05-11 18:45:28	No lab tests exist	rid501	Common Cold	acetaminophen	Wash Your Hands Often, Avoid Touching Your Face, Don't Smoke And Maintain A Healthy Life Style.
ehrid2071	Hospital2	patient2071	doctor2	Malaria	Chloroquine phosphate	2019-05-17 09:47:07	Malaria Rapid Diagnostic Test	rid2071	Malaria	Artemether/Lumfantrine Treatment	Drink Plenty Of Water, Control Fats Intake, Consume Ripe Papaya, Sweet Lime, Grapes Which Are Rich in Vitamin C
ehrid1067	Hospital2	patient1067	doctor2	Diabetes	Metformin 250mg -2 Nos	2021-06-13 20:29:35	HbA1C,Fasting Blood Sugar Test	rid1067	Diabetes	Metformin 750mg -2 Nos	Regular Physical Activity - Success 30 Minutes A Day, Avoid Sugar, Ready To Eat Foods.
ehrid896	Hospital1	patient896	doctor1	Tuberculosis	Rifater >600mg	2022-02-06 11:44:58	Rapid Sputum Test,T-Spot	rid896	Tuberculosis	Isoniazid INH pills for 6/9 months	Skip Tobacco In All Forms , Don't Consume Alchohol And Limit Caffeinated Drinks.
ehrid1413	Hospital2	patient1413	doctor2	Asthma	Combination inhalers	2022-09-30 00:40:53	FeNO test, spirometry	rid1413	Asthma	Theophylline -2 Nos	Avoid Smoke of Any Type, Control Asthma Triggers.
ehrid1970	Hospital1	patient1970	doctor1	Diarrhea	Loperamide, Bismuth	2021-11-03 08:00:10	Blood test,stool test,Clostridium difficile toxin test	rid1970	infections, travelers' diarrhea	subsalicylate	Avoid Dairy Products, Spicy Foods And All Citrus Foods And Alcohol.
ehrid49	Hospital2	patient49	doctor2	Common Cold	acetaminophen (Tylenol)	2021-07-01 20:59:20	No lab tests exist	rid49	Common Cold and Fever	acetaminophen	Wash Your Hands Often, Avoid Touching Your Face, Don't Smoke And Maintain A Healthy Life Style.
ehrid442	Hospital1	patient442	doctor1	Heart Disease	Aspirin 75mg,Pain Relieavers	2020-10-10 19:55:11	ECG,Blood Test,CT,MRI	rid442	Heart Disease	thrombolytics	Regular Physical Activity - Success 30 Minutes A Day, Avoid Saturated And Trans Fat And Fried Foods, As Well As Snacky-Type Foods.
ehrid742	Hospital1	patient742	doctor1	Stroke	Aspirin 75mg,tPA	2021-10-17 01:14:58	CT ,MRI,Echocardiogram	rid742	Stroke	clopidogrel,dipyridamole	Avoid Sugar, Salt, Highly Processed Foods, Saturated And Trans Fats And Fried Foods.
ehrid848	Hospital1	patient848	doctor1	Tuberculosis	Rifater >600mg	2019-09-03 05:50:27	Rapid Sputum Test,T-Spot	rid848	Tuberculosis	Isoniazid INH pills for 6/9 months	Skip Tobacco In All Forms , Don't Consume Alchohol And Limit Caffeinated Drinks.
ehrid1986	Hospital1	patient1986	doctor1	Diarrhea	Loperamide, Bismuth	2019-10-09 03:56:29	Blood test,stool test,Clostridium difficile toxin test	rid1986	infections, travelers' diarrhea	subsalicylate	Avoid Dairy Products, Spicy Foods And All Citrus Foods And Alcohol.
ehrid72	Hospital1	patient72	doctor1	HIV/AIDS	antiretroviral therapy (ART)	2022-12-24 10:38:16	Antigen/antibody tests	rid72	HIV/AIDS	antiretroviral therapy	Do Not Shoot Drugs, Avoid Sex And Do Not Breastfeed And Follow Balanced Diet.
ehrid1251	Hospital2	patient1251	doctor2	Asthma	Combination inhalers	2021-01-06 00:53:23	FeNO test, spirometry	rid1251	Asthma	Theophylline -2 Nos	Avoid Smoke of Any Type, Control Asthma Triggers.
ehrid1632	Hospital1	patient1632	doctor1	Cirrhosis	ursodiol	2019-01-27 22:01:26	liver biopsy	rid1632	Cirrhosis	ursodiol	Eat Foods Like Lean Protein Poultry Or Fish, Strictly Avoid Alcohol.
ehrid1037	Hospital2	patient1037	doctor2	Heart Disease	Aspirin 75mg,Pain Relieavers	2021-08-30 19:02:47	ECG,Blood Test,CT,MRI	rid1037	Heart Disease	thrombolytics	Regular Physical Activity - Success 30 Minutes A Day, Avoid Saturated And Trans Fat And Fried Foods, As Well As Snacky-Type Foods.
ehrid1740	Hospital1	patient1740	doctor1	Diarrhea	Loperamide, Bismuth	2022-02-06 11:43:45	Blood test,stool test,Clostridium difficile toxin test	rid1740	infections, travelers' diarrhea	subsalicylate	Avoid Dairy Products, Spicy Foods And All Citrus Foods And Alcohol.
ehrid2179	Hospital1	patient2179	doctor2	Heart Disease	Aspirin 75mg,Pain Relieavers	2019-07-26 05:01:33	ECG,Blood Test,CT,MRI	rid2221	Heart Disease and Hypertension	thrombolytics	Regular Physical Activity - Success 30 Minutes A Day, Avoid Saturated And Trans Fat And Fried Foods, As Well As Snacky-Type Foods.
ehrid873	Hospital2	patient873	doctor2	Asthma	Combination inhalers	2022-06-13 23:02:14	FeNO test, spirometry	rid873	Asthma	Theophylline -2 Nos	Avoid Smoke of Any Type, Control Asthma Triggers.
ehrid1899	Hospital2	patient1899	doctor2	Asthma	Combination inhalers	2022-10-28 11:31:14	FeNO test, spirometry	rid1899	Asthma	Theophylline -2 Nos	Avoid Smoke of Any Type, Control Asthma Triggers.
ehrid321	Hospital2	patient321	doctor2	Common Cold	acetaminophen (Tylenol)	2019-07-24 12:13:02	No lab tests exist	rid321	Common Cold	acetaminophen	Wash Your Hands Often, Avoid Touching Your Face, Don't Smoke And Maintain A Healthy Life Style.
ehrid1143	Hospital2	patient1143	doctor2	Asthma	Combination inhalers	2020-04-04 20:17:58	FeNO test, spirometry	rid1143	Asthma	Theophylline -2 Nos	Avoid Smoke of Any Type, Control Asthma Triggers.
ehrid1809	Hospital2	patient1809	doctor2	Asthma	Combination inhalers	2020-07-01 13:44:03	FeNO test, spirometry	rid1809	Asthma	Theophylline -2 Nos	Avoid Smoke of Any Type, Control Asthma Triggers.
ehrid2162	Hospital1	patient2162	doctor1	Heart Disease	Aspirin 75mg,Pain Relieavers	2021-07-18 13:43:28	ECG,Blood Test,CT,MRI	rid2101	Heart Disease and Hypertension	thrombolytics	Regular Physical Activity - Success 30 Minutes A Day, Avoid Saturated And Trans Fat And Fried Foods, As Well As Snacky-Type Foods.
ehrid1098	Hospital1	patient1098	doctor1	HIV/AIDS	antiretroviral therapy (ART)	2020-06-16 03:01:39	Antigen/antibody tests	rid1098	HIV/AIDS	antiretroviral therapy	Do Not Shoot Drugs, Avoid Sex And Do Not Breastfeed And Follow Balanced Diet.
ehrid2161	Hospital2	patient2161	doctor2	Heart Disease	Aspirin 75mg,Pain Relieavers	2021-05-24 07:59:16	ECG,Blood Test,CT,MRI	rid2265	Heart Disease and Hypertension	thrombolytics	Regular Physical Activity - Success 30 Minutes A Day, Avoid Saturated And Trans Fat And Fried Foods, As Well As Snacky-Type Foods.
ehrid1320	Hospital1	patient1320	doctor1	Diarrhea	Loperamide, Bismuth	2020-11-02 18:52:56	Blood test,stool test,Clostridium difficile toxin test	rid1320	infections, travelers' diarrhea	subsalicylate	Avoid Dairy Products, Spicy Foods And All Citrus Foods And Alcohol.
ehrid739	Hospital2	patient739	doctor2	Common Cold	acetaminophen (Tylenol)	2021-08-05 06:47:35	No lab tests exist	rid739	Common Cold	acetaminophen	Wash Your Hands Often, Avoid Touching Your Face, Don't Smoke And Maintain A Healthy Life Style.
ehrid1449	Hospital2	patient1449	doctor2	Common Cold	acetaminophen (Tylenol)	2022-04-08 17:14:36	No lab tests exist	rid1449	Common Cold	acetaminophen	Wash Your Hands Often, Avoid Touching Your Face, Don't Smoke And Maintain A Healthy Life Style.
ehrid1489	Hospital2	patient1489	doctor2	Diarrhea	Loperamide, Bismuth	2020-12-18 14:57:57	Blood test,stool test,Clostridium difficile toxin test	rid1489	infections, travelers' diarrhea	subsalicylate	Avoid Dairy Products, Spicy Foods And All Citrus Foods And Alcohol.
ehrid1024	Hospital1	patient1024	doctor1	Tuberculosis	Rifater >600mg	2022-08-12 10:06:19	Rapid Sputum Test,T-Spot	rid1024	Tuberculosis	Isoniazid INH pills for 6/9 months	Skip Tobacco In All Forms , Don't Consume Alchohol And Limit Caffeinated Drinks.
ehrid589	Hospital2	patient589	doctor2	Malaria	Chloroquine phosphate	2021-01-26 19:25:17	Malaria Rapid Diagnostic Test	rid589	Malaria	Artemether/Lumfantrine Treatment	Drink Plenty Of Water, Control Fats Intake, Consume Ripe Papaya, Sweet Lime, Grapes Which Are Rich in Vitamin C
ehrid569	Hospital2	patient569	doctor2	Common Cold	acetaminophen (Tylenol)	2022-06-22 22:21:02	No lab tests exist	rid569	Common Cold	acetaminophen	Wash Your Hands Often, Avoid Touching Your Face, Don't Smoke And Maintain A Healthy Life Style.
ehrid1423	Hospital2	patient1423	doctor2	Diarrhea	Loperamide, Bismuth	2019-12-08 13:08:48	Blood test,stool test,Clostridium difficile toxin test	rid1423	infections, travelers' diarrhea	subsalicylate	Avoid Dairy Products, Spicy Foods And All Citrus Foods And Alcohol.
ehrid562	Hospital1	patient562	doctor1	Common Cold	acetaminophen (Tylenol)	2021-08-07 15:07:29	No lab tests exist	rid562	Common Cold	acetaminophen	Wash Your Hands Often, Avoid Touching Your Face, Don't Smoke And Maintain A Healthy Life Style.
ehrid1171	Hospital2	patient1171	doctor2	Diarrhea	Loperamide, Bismuth	2022-10-06 12:42:24	Blood test,stool test,Clostridium difficile toxin test	rid1171	infections, travelers' diarrhea	subsalicylate	Avoid Dairy Products, Spicy Foods And All Citrus Foods And Alcohol.
ehrid726	Hospital1	patient726	doctor1	Diabetes	Metformin 250mg -2 Nos	2020-11-10 17:47:53	HbA1C,Fasting Blood Sugar Test	rid726	Diabetes	Metformin 750mg -2 Nos	Regular Physical Activity - Success 30 Minutes A Day, Avoid Sugar, Ready To Eat Foods.
ehrid301	Hospital2	patient301	doctor2	Common Cold	acetaminophen (Tylenol)	2022-03-02 17:38:57	No lab tests exist	rid301	Common Cold	acetaminophen	Wash Your Hands Often, Avoid Touching Your Face, Don't Smoke And Maintain A Healthy Life Style.
ehrid1064	Hospital1	patient1064	doctor1	Malaria	Chloroquine phosphate	2022-10-05 20:23:38	Malaria Rapid Diagnostic Test	rid1064	Malaria	Artemether/Lumfantrine Treatment	Drink Plenty Of Water, Control Fats Intake, Consume Ripe Papaya, Sweet Lime, Grapes Which Are Rich in Vitamin C
ehrid165	Hospital2	patient165	doctor2	Alzheimer	Galantamine, rivastigmine	2019-07-23 14:30:10	MRI,CT	rid165	Alzheimer	donepezil	Follow Mind Diet, Should Have <4 Servings A Week Of Red Meat, Less Than A Tablespoon Of Butter A Day.
ehrid2149	Hospital1	patient2149	doctor2	Heart Disease	Aspirin 75mg,Pain Relieavers	2020-09-11 15:54:58	ECG,Blood Test,CT,MRI	rid2105	Heart Disease and Hypertension	thrombolytics	Regular Physical Activity - Success 30 Minutes A Day, Avoid Saturated And Trans Fat And Fried Foods, As Well As Snacky-Type Foods.
ehrid2064	Hospital1	patient2064	doctor1	Cirrhosis	ursodiol	2020-06-06 13:39:04	liver biopsy	rid2064	Cirrhosis	ursodiol	Eat Foods Like Lean Protein Poultry Or Fish, Strictly Avoid Alcohol.
ehrid2106	Hospital2	patient2106	doctor1	Heart Disease	Aspirin 75mg,Pain Relieavers	2021-08-12 10:53:17	ECG,Blood Test,CT,MRI	rid2186	Heart Disease and Hypertension	thrombolytics	Regular Physical Activity - Success 30 Minutes A Day, Avoid Saturated And Trans Fat And Fried Foods, As Well As Snacky-Type Foods.
ehrid1081	Hospital2	patient1081	doctor2	Common Cold	acetaminophen (Tylenol)	2022-04-27 09:36:09	No lab tests exist	rid1081	Common Cold	acetaminophen	Wash Your Hands Often, Avoid Touching Your Face, Don't Smoke And Maintain A Healthy Life Style.
ehrid1601	Hospital2	patient1601	doctor2	Diarrhea	Loperamide, Bismuth	2022-06-25 07:50:51	Blood test,stool test,Clostridium difficile toxin test	rid1601	infections, travelers' diarrhea	subsalicylate	Avoid Dairy Products, Spicy Foods And All Citrus Foods And Alcohol.
ehrid1296	Hospital1	patient1296	doctor1	HIV/AIDS	antiretroviral therapy (ART)	2022-02-07 12:03:09	Antigen/antibody tests	rid1296	HIV/AIDS	antiretroviral therapy	Do Not Shoot Drugs, Avoid Sex And Do Not Breastfeed And Follow Balanced Diet.
ehrid307	Hospital2	patient307	doctor2	Common Cold	acetaminophen (Tylenol)	2022-10-06 04:34:49	No lab tests exist	rid307	Common Cold	acetaminophen	Wash Your Hands Often, Avoid Touching Your Face, Don't Smoke And Maintain A Healthy Life Style.
ehrid1898	Hospital1	patient1898	doctor1	Lung Cancer	Afinitor Disperz	2020-10-28 05:55:02	PET-CT scan,Chest X-ray	rid1898	Lung Cancer	Everolimus	Avoid Smoking Or passive Smoking.
ehrid1891	Hospital2	patient1891	doctor2	Diarrhea	Loperamide, Bismuth	2022-03-11 22:04:51	Blood test,stool test,Clostridium difficile toxin test	rid1891	infections, travelers' diarrhea	subsalicylate	Avoid Dairy Products, Spicy Foods And All Citrus Foods And Alcohol.
ehrid977	Hospital2	patient977	doctor2	Common Cold	acetaminophen (Tylenol)	2020-10-14 11:48:51	No lab tests exist	rid977	Common Cold	acetaminophen	Wash Your Hands Often, Avoid Touching Your Face, Don't Smoke And Maintain A Healthy Life Style.
ehrid1661	Hospital2	patient1661	doctor2	Diabetes	Metformin 250mg -2 Nos	2021-05-22 08:13:17	HbA1C,Fasting Blood Sugar Test	rid1661	Diabetes	Metformin 750mg -2 Nos	Regular Physical Activity - Success 30 Minutes A Day, Avoid Sugar, Ready To Eat Foods.
ehrid1509	Hospital2	patient1509	doctor2	Diarrhea	Loperamide, Bismuth	2022-12-23 12:15:27	Blood test,stool test,Clostridium difficile toxin test	rid1509	infections, travelers' diarrhea	subsalicylate	Avoid Dairy Products, Spicy Foods And All Citrus Foods And Alcohol.
ehrid818	Hospital1	patient818	doctor1	Common Cold	acetaminophen (Tylenol)	2020-03-31 15:44:01	No lab tests exist	rid818	Common Cold	acetaminophen	Wash Your Hands Often, Avoid Touching Your Face, Don't Smoke And Maintain A Healthy Life Style.
ehrid2213	Hospital2	patient2213	doctor2	Heart Disease	Aspirin 75mg,Pain Relieavers	2022-08-03 15:16:12	ECG,Blood Test,CT,MRI	rid2201	Heart Disease and Hypertension	thrombolytics	Regular Physical Activity - Success 30 Minutes A Day, Avoid Saturated And Trans Fat And Fried Foods, As Well As Snacky-Type Foods.
ehrid1727	Hospital2	patient1727	doctor2	Diabetes	Metformin 250mg -2 Nos	2019-04-27 04:19:15	HbA1C,Fasting Blood Sugar Test	rid1727	Diabetes	Metformin 750mg -2 Nos	Regular Physical Activity - Success 30 Minutes A Day, Avoid Sugar, Ready To Eat Foods.
ehrid132	Hospital1	patient132	doctor1	Cirrhosis	ursodiol	2021-04-05 15:19:43	liver biopsy	rid132	Cirrhosis	ursodiol	Eat Foods Like Lean Protein Poultry Or Fish, Strictly Avoid Alcohol.
ehrid2014	Hospital1	patient2014	doctor1	Malaria	Chloroquine phosphate	2022-02-16 13:47:11	Malaria Rapid Diagnostic Test	rid2014	Malaria	Artemether/Lumfantrine Treatment	Drink Plenty Of Water, Control Fats Intake, Consume Ripe Papaya, Sweet Lime, Grapes Which Are Rich in Vitamin C
ehrid748	Hospital1	patient748	doctor1	Heart Disease	Aspirin 75mg,Pain Relieavers	2019-11-30 03:18:54	ECG,Blood Test,CT,MRI	rid748	Heart Disease	thrombolytics	Regular Physical Activity - Success 30 Minutes A Day, Avoid Saturated And Trans Fat And Fried Foods, As Well As Snacky-Type Foods.
ehrid1268	Hospital1	patient1268	doctor1	Diarrhea	Loperamide, Bismuth	2022-10-22 23:13:31	Blood test,stool test,Clostridium difficile toxin test	rid1268	infections, travelers' diarrhea	subsalicylate	Avoid Dairy Products, Spicy Foods And All Citrus Foods And Alcohol.
ehrid1348	Hospital1	patient1348	doctor1	Diarrhea	Loperamide, Bismuth	2019-01-20 02:03:24	Blood test,stool test,Clostridium difficile toxin test	rid1348	infections, travelers' diarrhea	subsalicylate	Avoid Dairy Products, Spicy Foods And All Citrus Foods And Alcohol.
ehrid2013	Hospital2	patient2013	doctor2	Diabetes	Metformin 250mg -2 Nos	2022-09-19 20:46:01	HbA1C,Fasting Blood Sugar Test	rid2013	Diabetes	Metformin 750mg -2 Nos	Regular Physical Activity - Success 30 Minutes A Day, Avoid Sugar, Ready To Eat Foods.
ehrid210	Hospital1	patient210	doctor1	Stomach Cancer	5-FU (fluorouracil) and leucovorin (folinic acid)	2019-10-15 06:54:00	Upper endoscopy	rid210	Stomach Cancer	chemotherapy	Choose Low-Fat Diary Products, Protien-Rich Foods.
ehrid1020	Hospital1	patient1020	doctor1	Diarrhea	Loperamide, Bismuth	2022-02-12 11:11:04	Blood test,stool test,Clostridium difficile toxin test	rid1020	infections, travelers' diarrhea	subsalicylate	Avoid Dairy Products, Spicy Foods And All Citrus Foods And Alcohol.
ehrid1835	Hospital2	patient1835	doctor2	Diarrhea	Loperamide, Bismuth	2020-06-15 23:11:49	Blood test,stool test,Clostridium difficile toxin test	rid1835	infections, travelers' diarrhea	subsalicylate	Avoid Dairy Products, Spicy Foods And All Citrus Foods And Alcohol.
ehrid322	Hospital1	patient322	doctor1	Common Cold	acetaminophen (Tylenol)	2021-06-04 16:27:29	No lab tests exist	rid322	Common Cold	acetaminophen	Wash Your Hands Often, Avoid Touching Your Face, Don't Smoke And Maintain A Healthy Life Style.
ehrid1917	Hospital2	patient1917	doctor2	Asthma	Combination inhalers	2020-03-27 20:12:45	FeNO test, spirometry	rid1917	Asthma	Theophylline -2 Nos	Avoid Smoke of Any Type, Control Asthma Triggers.
ehrid1629	Hospital2	patient1629	doctor2	Asthma	Combination inhalers	2020-08-01 18:04:50	FeNO test, spirometry	rid1629	Asthma	Theophylline -2 Nos	Avoid Smoke of Any Type, Control Asthma Triggers.
ehrid881	Hospital2	patient881	doctor2	Common Cold	acetaminophen (Tylenol)	2022-11-14 13:10:21	No lab tests exist	rid881	Common Cold	acetaminophen	Wash Your Hands Often, Avoid Touching Your Face, Don't Smoke And Maintain A Healthy Life Style.
ehrid593	Hospital2	patient593	doctor2	Common Cold	acetaminophen (Tylenol)	2021-04-04 15:23:42	No lab tests exist	rid593	Common Cold	acetaminophen	Wash Your Hands Often, Avoid Touching Your Face, Don't Smoke And Maintain A Healthy Life Style.
ehrid750	Hospital1	patient750	doctor1	Fever	paracetamol 500mg	2021-12-09 13:23:03	Blood Test and Urine Test	rid750	Fever	Acetaminophen injection	Avoid Caffeine And Alcohol, Stay Hydrated, Have Ample Amount Of Rest.
ehrid1976	Hospital1	patient1976	doctor1	Malaria	Chloroquine phosphate	2022-11-03 02:55:05	Malaria Rapid Diagnostic Test	rid1976	Malaria	Artemether/Lumfantrine Treatment	Drink Plenty Of Water, Control Fats Intake, Consume Ripe Papaya, Sweet Lime, Grapes Which Are Rich in Vitamin C
ehrid815	Hospital2	patient815	doctor2	Common Cold	acetaminophen (Tylenol)	2019-08-15 05:15:54	No lab tests exist	rid815	Common Cold	acetaminophen	Wash Your Hands Often, Avoid Touching Your Face, Don't Smoke And Maintain A Healthy Life Style.
ehrid1287	Hospital2	patient1287	doctor2	Asthma	Combination inhalers	2022-02-06 02:53:01	FeNO test, spirometry	rid1287	Asthma	Theophylline -2 Nos	Avoid Smoke of Any Type, Control Asthma Triggers.
ehrid719	Hospital2	patient719	doctor2	Common Cold	acetaminophen (Tylenol)	2022-09-25 20:19:38	No lab tests exist	rid719	Common Cold	acetaminophen	Wash Your Hands Often, Avoid Touching Your Face, Don't Smoke And Maintain A Healthy Life Style.
ehrid933	Hospital2	patient933	doctor2	Common Cold	acetaminophen (Tylenol)	2019-11-17 10:17:23	No lab tests exist	rid933	Common Cold	acetaminophen	Wash Your Hands Often, Avoid Touching Your Face, Don't Smoke And Maintain A Healthy Life Style.
ehrid876	Hospital1	patient876	doctor1	Cirrhosis	ursodiol	2020-06-27 20:05:44	liver biopsy	rid876	Cirrhosis	ursodiol	Eat Foods Like Lean Protein Poultry Or Fish, Strictly Avoid Alcohol.
ehrid2237	Hospital1	patient2237	doctor2	Heart Disease	Aspirin 75mg,Pain Relieavers	2019-01-10 04:40:39	ECG,Blood Test,CT,MRI	rid2259	Heart Disease and Hypertension	thrombolytics	Regular Physical Activity - Success 30 Minutes A Day, Avoid Saturated And Trans Fat And Fried Foods, As Well As Snacky-Type Foods.
ehrid504	Hospital1	patient504	doctor1	Stomach Cancer	5-FU (fluorouracil) and leucovorin (folinic acid)	2020-12-29 07:53:32	Upper endoscopy	rid504	Stomach Cancer	chemotherapy	Choose Low-Fat Diary Products, Protien-Rich Foods.
ehrid237	Hospital2	patient237	doctor2	Common Cold	acetaminophen (Tylenol)	2020-04-08 22:28:39	No lab tests exist	rid237	Common Cold	acetaminophen	Wash Your Hands Often, Avoid Touching Your Face, Don't Smoke And Maintain A Healthy Life Style.
ehrid281	Hospital2	patient281	doctor2	Common Cold	acetaminophen (Tylenol)	2019-08-18 08:13:23	No lab tests exist	rid281	Common Cold	acetaminophen	Wash Your Hands Often, Avoid Touching Your Face, Don't Smoke And Maintain A Healthy Life Style.
ehrid413	Hospital2	patient413	doctor2	Common Cold	acetaminophen (Tylenol)	2020-02-23 08:37:43	No lab tests exist	rid413	Common Cold	acetaminophen	Wash Your Hands Often, Avoid Touching Your Face, Don't Smoke And Maintain A Healthy Life Style.
ehrid1060	Hospital1	patient1060	doctor1	Diarrhea	Loperamide, Bismuth	2019-12-15 07:42:22	Blood test,stool test,Clostridium difficile toxin test	rid1060	infections, travelers' diarrhea	subsalicylate	Avoid Dairy Products, Spicy Foods And All Citrus Foods And Alcohol.
ehrid808	Hospital1	patient808	doctor1	Common Cold	acetaminophen (Tylenol)	2019-08-30 07:40:44	No lab tests exist	rid808	Common Cold	acetaminophen	Wash Your Hands Often, Avoid Touching Your Face, Don't Smoke And Maintain A Healthy Life Style.
ehrid2109	Hospital1	patient2109	doctor2	Heart Disease	Aspirin 75mg,Pain Relieavers	2021-08-22 14:55:48	ECG,Blood Test,CT,MRI	rid2200	Heart Disease and Hypertension	thrombolytics	Regular Physical Activity - Success 30 Minutes A Day, Avoid Saturated And Trans Fat And Fried Foods, As Well As Snacky-Type Foods.
ehrid579	Hospital2	patient579	doctor2	Common Cold	acetaminophen (Tylenol)	2022-07-18 07:53:26	No lab tests exist	rid579	Common Cold	acetaminophen	Wash Your Hands Often, Avoid Touching Your Face, Don't Smoke And Maintain A Healthy Life Style.
ehrid1118	Hospital1	patient1118	doctor1	Lung Cancer	Afinitor Disperz	2019-07-15 19:23:12	PET-CT scan,Chest X-ray	rid1118	Lung Cancer	Everolimus	Avoid Smoking Or passive Smoking.
ehrid972	Hospital1	patient972	doctor1	HIV/AIDS	antiretroviral therapy (ART)	2022-04-12 09:02:37	Antigen/antibody tests	rid972	HIV/AIDS	antiretroviral therapy	Do Not Shoot Drugs, Avoid Sex And Do Not Breastfeed And Follow Balanced Diet.
ehrid1314	Hospital1	patient1314	doctor1	HIV/AIDS	antiretroviral therapy (ART)	2022-11-21 16:45:09	Antigen/antibody tests	rid1314	HIV/AIDS	antiretroviral therapy	Do Not Shoot Drugs, Avoid Sex And Do Not Breastfeed And Follow Balanced Diet.
ehrid1745	Hospital2	patient1745	doctor2	Diarrhea	Loperamide, Bismuth	2019-06-11 11:28:51	Blood test,stool test,Clostridium difficile toxin test	rid1745	infections, travelers' diarrhea	subsalicylate	Avoid Dairy Products, Spicy Foods And All Citrus Foods And Alcohol.
ehrid1284	Hospital1	patient1284	doctor1	Cirrhosis	ursodiol	2022-08-17 23:21:22	liver biopsy	rid1284	Cirrhosis	ursodiol	Eat Foods Like Lean Protein Poultry Or Fish, Strictly Avoid Alcohol.
ehrid1804	Hospital1	patient1804	doctor1	Diabetes	Metformin 250mg -2 Nos	2019-12-28 06:18:53	HbA1C,Fasting Blood Sugar Test	rid1804	Diabetes	Metformin 750mg -2 Nos	Regular Physical Activity - Success 30 Minutes A Day, Avoid Sugar, Ready To Eat Foods.
ehrid801	Hospital2	patient801	doctor2	Asthma	Combination inhalers	2022-06-23 17:36:40	FeNO test, spirometry	rid801	Asthma	Theophylline -2 Nos	Avoid Smoke of Any Type, Control Asthma Triggers.
ehrid126	Hospital1	patient126	doctor1	Stomach Cancer	5-FU (fluorouracil) and leucovorin (folinic acid)	2022-05-02 03:09:43	Upper endoscopy	rid126	Stomach Cancer	chemotherapy	Choose Low-Fat Diary Products, Protien-Rich Foods.
ehrid1170	Hospital1	patient1170	doctor1	HIV/AIDS	antiretroviral therapy (ART)	2020-12-12 01:23:39	Antigen/antibody tests	rid1170	HIV/AIDS	antiretroviral therapy	Do Not Shoot Drugs, Avoid Sex And Do Not Breastfeed And Follow Balanced Diet.
ehrid514	Hospital1	patient514	doctor1	Common Cold	acetaminophen (Tylenol)	2022-10-10 14:02:50	No lab tests exist	rid514	Common Cold	acetaminophen	Wash Your Hands Often, Avoid Touching Your Face, Don't Smoke And Maintain A Healthy Life Style.
ehrid168	Hospital1	patient168	doctor1	Stomach Cancer	5-FU (fluorouracil) and leucovorin (folinic acid)	2022-05-08 11:18:36	Upper endoscopy	rid168	Stomach Cancer	chemotherapy	Choose Low-Fat Diary Products, Protien-Rich Foods.
ehrid70	Hospital1	patient70	doctor1	Diarrhea	Loperamide, Bismuth	2019-03-15 17:19:08	Blood test,stool test,Clostridium difficile toxin test	rid70	infections, travelers' diarrhea	subsalicylate	Avoid Dairy Products, Spicy Foods And All Citrus Foods And Alcohol.
ehrid691	Hospital2	patient691	doctor2	Common Cold	acetaminophen (Tylenol)	2021-07-11 18:32:43	No lab tests exist	rid691	Common Cold	acetaminophen	Wash Your Hands Often, Avoid Touching Your Face, Don't Smoke And Maintain A Healthy Life Style.
ehrid2072	Hospital1	patient2072	doctor1	Stroke	Aspirin 75mg,tPA	2019-07-09 05:33:21	CT ,MRI,Echocardiogram	rid2072	Stroke	clopidogrel,dipyridamole	Avoid Sugar, Salt, Highly Processed Foods, Saturated And Trans Fats And Fried Foods.
ehrid446	Hospital1	patient446	doctor1	Common Cold	acetaminophen (Tylenol)	2021-12-02 15:17:04	No lab tests exist	rid446	Common Cold	acetaminophen	Wash Your Hands Often, Avoid Touching Your Face, Don't Smoke And Maintain A Healthy Life Style.
ehrid1161	Hospital2	patient1161	doctor2	Asthma	Combination inhalers	2021-07-12 09:00:34	FeNO test, spirometry	rid1161	Asthma	Theophylline -2 Nos	Avoid Smoke of Any Type, Control Asthma Triggers.
ehrid2235	Hospital1	patient2235	doctor2	Heart Disease	Aspirin 75mg,Pain Relieavers	2020-12-27 23:04:52	ECG,Blood Test,CT,MRI	rid2131	Heart Disease and Hypertension	thrombolytics	Regular Physical Activity - Success 30 Minutes A Day, Avoid Saturated And Trans Fat And Fried Foods, As Well As Snacky-Type Foods.
ehrid928	Hospital1	patient928	doctor1	Tuberculosis	Rifater >600mg	2020-09-21 16:21:33	Rapid Sputum Test,T-Spot	rid928	Tuberculosis	Isoniazid INH pills for 6/9 months	Skip Tobacco In All Forms , Don't Consume Alchohol And Limit Caffeinated Drinks.
ehrid1624	Hospital1	patient1624	doctor1	Stroke	Aspirin 75mg,tPA	2019-09-13 01:05:11	CT ,MRI,Echocardiogram	rid1624	Stroke	clopidogrel,dipyridamole	Avoid Sugar, Salt, Highly Processed Foods, Saturated And Trans Fats And Fried Foods.
ehrid1731	Hospital2	patient1731	doctor2	Diarrhea	Loperamide, Bismuth	2021-02-27 04:49:44	Blood test,stool test,Clostridium difficile toxin test	rid1731	infections, travelers' diarrhea	subsalicylate	Avoid Dairy Products, Spicy Foods And All Citrus Foods And Alcohol.
ehrid396	Hospital1	patient396	doctor1	HIV/AIDS	antiretroviral therapy (ART)	2020-10-17 01:43:52	Antigen/antibody tests	rid396	HIV/AIDS	antiretroviral therapy	Do Not Shoot Drugs, Avoid Sex And Do Not Breastfeed And Follow Balanced Diet.
ehrid1049	Hospital2	patient1049	doctor2	Diarrhea	Loperamide, Bismuth	2022-02-15 18:07:23	Blood test,stool test,Clostridium difficile toxin test	rid1049	infections, travelers' diarrhea	subsalicylate	Avoid Dairy Products, Spicy Foods And All Citrus Foods And Alcohol.
ehrid2182	Hospital1	patient2182	doctor1	Heart Disease	Aspirin 75mg,Pain Relieavers	2022-04-17 18:10:34	ECG,Blood Test,CT,MRI	rid2154	Heart Disease and Hypertension	thrombolytics	Regular Physical Activity - Success 30 Minutes A Day, Avoid Saturated And Trans Fat And Fried Foods, As Well As Snacky-Type Foods.
ehrid2207	Hospital1	patient2207	doctor2	Heart Disease	Aspirin 75mg,Pain Relieavers	2020-09-27 17:13:11	ECG,Blood Test,CT,MRI	rid2187	Heart Disease and Hypertension	thrombolytics	Regular Physical Activity - Success 30 Minutes A Day, Avoid Saturated And Trans Fat And Fried Foods, As Well As Snacky-Type Foods.
ehrid1660	Hospital1	patient1660	doctor1	Diarrhea	Loperamide, Bismuth	2020-01-19 16:41:29	Blood test,stool test,Clostridium difficile toxin test	rid1660	infections, travelers' diarrhea	subsalicylate	Avoid Dairy Products, Spicy Foods And All Citrus Foods And Alcohol.
ehrid106	Hospital1	patient106	doctor1	Common Cold	acetaminophen (Tylenol)	2021-07-19 01:05:11	No lab tests exist	rid106	Common Cold	acetaminophen	Wash Your Hands Often, Avoid Touching Your Face, Don't Smoke And Maintain A Healthy Life Style.
ehrid2081	Hospital2	patient2081	doctor2	Diarrhea	Loperamide, Bismuth	2021-01-27 04:05:56	Blood test,stool test,Clostridium difficile toxin test	rid2081	infections, travelers' diarrhea	subsalicylate	Avoid Dairy Products, Spicy Foods And All Citrus Foods And Alcohol.
ehrid1452	Hospital1	patient1452	doctor1	Cirrhosis	ursodiol	2020-02-03 02:17:16	liver biopsy	rid1452	Cirrhosis	ursodiol	Eat Foods Like Lean Protein Poultry Or Fish, Strictly Avoid Alcohol.
ehrid488	Hospital1	patient488	doctor1	Common Cold	acetaminophen (Tylenol)	2022-06-26 23:44:42	No lab tests exist	rid488	Common Cold	acetaminophen	Wash Your Hands Often, Avoid Touching Your Face, Don't Smoke And Maintain A Healthy Life Style.
ehrid1262	Hospital1	patient1262	doctor1	Diarrhea	Loperamide, Bismuth	2021-03-16 04:37:21	Blood test,stool test,Clostridium difficile toxin test	rid1262	infections, travelers' diarrhea	subsalicylate	Avoid Dairy Products, Spicy Foods And All Citrus Foods And Alcohol.
ehrid53	Hospital2	patient53	doctor2	Common Cold	acetaminophen (Tylenol)	2020-04-23 16:48:47	No lab tests exist	rid53	Common Cold and Fever	acetaminophen	Wash Your Hands Often, Avoid Touching Your Face, Don't Smoke And Maintain A Healthy Life Style.
ehrid744	Hospital1	patient744	doctor1	Cirrhosis	ursodiol	2022-06-23 01:01:21	liver biopsy	rid744	Cirrhosis	ursodiol	Eat Foods Like Lean Protein Poultry Or Fish, Strictly Avoid Alcohol.
ehrid330	Hospital1	patient330	doctor1	Diarrhea	Loperamide, Bismuth	2021-04-23 04:31:12	Blood test,stool test,Clostridium difficile toxin test	rid330	infections, travelers' diarrhea	subsalicylate	Avoid Dairy Products, Spicy Foods And All Citrus Foods And Alcohol.
ehrid1482	Hospital1	patient1482	doctor1	Malaria	Chloroquine phosphate	2022-06-28 11:22:37	Malaria Rapid Diagnostic Test	rid1482	Malaria	Artemether/Lumfantrine Treatment	Drink Plenty Of Water, Control Fats Intake, Consume Ripe Papaya, Sweet Lime, Grapes Which Are Rich in Vitamin C
ehrid1707	Hospital2	patient1707	doctor2	Diarrhea	Loperamide, Bismuth	2019-09-15 07:37:51	Blood test,stool test,Clostridium difficile toxin test	rid1707	infections, travelers' diarrhea	subsalicylate	Avoid Dairy Products, Spicy Foods And All Citrus Foods And Alcohol.
ehrid1951	Hospital2	patient1951	doctor2	Diarrhea	Loperamide, Bismuth	2022-02-19 00:09:46	Blood test,stool test,Clostridium difficile toxin test	rid1951	infections, travelers' diarrhea	subsalicylate	Avoid Dairy Products, Spicy Foods And All Citrus Foods And Alcohol.
ehrid1218	Hospital1	patient1218	doctor1	Stomach Cancer	5-FU (fluorouracil) and leucovorin (folinic acid)	2019-09-28 23:48:09	Upper endoscopy	rid1218	Stomach Cancer	chemotherapy	Choose Low-Fat Diary Products, Protien-Rich Foods.
ehrid2125	Hospital2	patient2125	doctor2	Heart Disease	Aspirin 75mg,Pain Relieavers	2020-08-19 18:13:42	ECG,Blood Test,CT,MRI	rid2190	Heart Disease and Hypertension	thrombolytics	Regular Physical Activity - Success 30 Minutes A Day, Avoid Saturated And Trans Fat And Fried Foods, As Well As Snacky-Type Foods.
ehrid130	Hospital1	patient130	doctor1	Diarrhea	Loperamide, Bismuth	2021-11-21 17:23:20	Blood test,stool test,Clostridium difficile toxin test	rid130	infections, travelers' diarrhea	subsalicylate	Avoid Dairy Products, Spicy Foods And All Citrus Foods And Alcohol.
ehrid2	Hospital1	patient2	doctor1	Common Cold	acetaminophen (Tylenol)	2022-02-03 12:13:56	No lab tests exist	rid2	Common Cold and Fever	acetaminophen	Wash Your Hands Often, Avoid Touching Your Face, Don't Smoke And Maintain A Healthy Life Style.
ehrid572	Hospital1	patient572	doctor1	Lung Cancer	Afinitor Disperz	2022-02-26 07:22:05	PET-CT scan,Chest X-ray	rid572	Lung Cancer	Everolimus	Avoid Smoking Or passive Smoking.
ehrid1518	Hospital1	patient1518	doctor1	Common Cold	acetaminophen (Tylenol)	2020-05-27 08:47:27	No lab tests exist	rid1518	Common Cold	acetaminophen	Wash Your Hands Often, Avoid Touching Your Face, Don't Smoke And Maintain A Healthy Life Style.
ehrid2194	Hospital1	patient2194	doctor1	Heart Disease	Aspirin 75mg,Pain Relieavers	2022-12-13 21:04:55	ECG,Blood Test,CT,MRI	rid2242	Heart Disease and Hypertension	thrombolytics	Regular Physical Activity - Success 30 Minutes A Day, Avoid Saturated And Trans Fat And Fried Foods, As Well As Snacky-Type Foods.
ehrid1609	Hospital2	patient1609	doctor2	Diarrhea	Loperamide, Bismuth	2022-01-01 15:16:41	Blood test,stool test,Clostridium difficile toxin test	rid1609	infections, travelers' diarrhea	subsalicylate	Avoid Dairy Products, Spicy Foods And All Citrus Foods And Alcohol.
ehrid422	Hospital1	patient422	doctor1	Common Cold	acetaminophen (Tylenol)	2022-09-20 15:09:27	No lab tests exist	rid422	Common Cold	acetaminophen	Wash Your Hands Often, Avoid Touching Your Face, Don't Smoke And Maintain A Healthy Life Style.
ehrid1973	Hospital2	patient1973	doctor2	Diarrhea	Loperamide, Bismuth	2019-11-23 13:09:53	Blood test,stool test,Clostridium difficile toxin test	rid1973	infections, travelers' diarrhea	subsalicylate	Avoid Dairy Products, Spicy Foods And All Citrus Foods And Alcohol.
ehrid2198	Hospital2	patient2198	doctor1	Heart Disease	Aspirin 75mg,Pain Relieavers	2022-11-09 14:36:23	ECG,Blood Test,CT,MRI	rid2236	Heart Disease and Hypertension	thrombolytics	Regular Physical Activity - Success 30 Minutes A Day, Avoid Saturated And Trans Fat And Fried Foods, As Well As Snacky-Type Foods.
ehrid1901	Hospital2	patient1901	doctor2	Diarrhea	Loperamide, Bismuth	2020-11-04 22:53:50	Blood test,stool test,Clostridium difficile toxin test	rid1901	infections, travelers' diarrhea	subsalicylate	Avoid Dairy Products, Spicy Foods And All Citrus Foods And Alcohol.
ehrid2140	Hospital2	patient2140	doctor1	Heart Disease	Aspirin 75mg,Pain Relieavers	2021-07-09 16:45:18	ECG,Blood Test,CT,MRI	rid2244	Heart Disease and Hypertension	thrombolytics	Regular Physical Activity - Success 30 Minutes A Day, Avoid Saturated And Trans Fat And Fried Foods, As Well As Snacky-Type Foods.
ehrid373	Hospital2	patient373	doctor2	Common Cold	acetaminophen (Tylenol)	2019-09-10 00:54:57	No lab tests exist	rid373	Common Cold	acetaminophen	Wash Your Hands Often, Avoid Touching Your Face, Don't Smoke And Maintain A Healthy Life Style.
ehrid417	Hospital2	patient417	doctor2	Common Cold	acetaminophen (Tylenol)	2021-05-13 01:01:13	No lab tests exist	rid417	Common Cold	acetaminophen	Wash Your Hands Often, Avoid Touching Your Face, Don't Smoke And Maintain A Healthy Life Style.
ehrid1146	Hospital1	patient1146	doctor1	Diarrhea	Loperamide, Bismuth	2019-08-30 12:17:37	Blood test,stool test,Clostridium difficile toxin test	rid1146	infections, travelers' diarrhea	subsalicylate	Avoid Dairy Products, Spicy Foods And All Citrus Foods And Alcohol.
ehrid203	Hospital2	patient203	doctor2	Common Cold	acetaminophen (Tylenol)	2022-05-19 17:17:53	No lab tests exist	rid203	Common Cold	acetaminophen	Wash Your Hands Often, Avoid Touching Your Face, Don't Smoke And Maintain A Healthy Life Style.
ehrid641	Hospital2	patient641	doctor2	Common Cold	acetaminophen (Tylenol)	2020-01-27 04:25:22	No lab tests exist	rid641	Common Cold	acetaminophen	Wash Your Hands Often, Avoid Touching Your Face, Don't Smoke And Maintain A Healthy Life Style.
ehrid1558	Hospital1	patient1558	doctor1	Malaria	Chloroquine phosphate	2020-05-08 01:18:23	Malaria Rapid Diagnostic Test	rid1558	Malaria	Artemether/Lumfantrine Treatment	Drink Plenty Of Water, Control Fats Intake, Consume Ripe Papaya, Sweet Lime, Grapes Which Are Rich in Vitamin C
ehrid2126	Hospital1	patient2126	doctor1	Heart Disease	Aspirin 75mg,Pain Relieavers	2020-07-01 00:40:22	ECG,Blood Test,CT,MRI	rid2223	Heart Disease and Hypertension	thrombolytics	Regular Physical Activity - Success 30 Minutes A Day, Avoid Saturated And Trans Fat And Fried Foods, As Well As Snacky-Type Foods.
ehrid1308	Hospital1	patient1308	doctor1	Cirrhosis	ursodiol	2020-12-14 12:59:37	liver biopsy	rid1308	Cirrhosis	ursodiol	Eat Foods Like Lean Protein Poultry Or Fish, Strictly Avoid Alcohol.
ehrid526	Hospital1	patient526	doctor1	Common Cold	acetaminophen (Tylenol)	2019-01-03 10:51:11	No lab tests exist	rid526	Common Cold	acetaminophen	Wash Your Hands Often, Avoid Touching Your Face, Don't Smoke And Maintain A Healthy Life Style.
ehrid1746	Hospital1	patient1746	doctor1	HIV/AIDS	antiretroviral therapy (ART)	2021-05-02 23:57:58	Antigen/antibody tests	rid1746	HIV/AIDS	antiretroviral therapy	Do Not Shoot Drugs, Avoid Sex And Do Not Breastfeed And Follow Balanced Diet.
ehrid460	Hospital1	patient460	doctor1	Common Cold	acetaminophen (Tylenol)	2019-12-11 08:05:05	No lab tests exist	rid460	Common Cold	acetaminophen	Wash Your Hands Often, Avoid Touching Your Face, Don't Smoke And Maintain A Healthy Life Style.
ehrid703	Hospital2	patient703	doctor2	Malaria	Chloroquine phosphate	2020-05-24 21:52:48	Malaria Rapid Diagnostic Test	rid703	Malaria	Artemether/Lumfantrine Treatment	Drink Plenty Of Water, Control Fats Intake, Consume Ripe Papaya, Sweet Lime, Grapes Which Are Rich in Vitamin C
ehrid1520	Hospital1	patient1520	doctor1	Diarrhea	Loperamide, Bismuth	2020-08-22 17:47:43	Blood test,stool test,Clostridium difficile toxin test	rid1520	infections, travelers' diarrhea	subsalicylate	Avoid Dairy Products, Spicy Foods And All Citrus Foods And Alcohol.
ehrid2085	Hospital2	patient2085	doctor2	Alzheimer	Galantamine, rivastigmine	2019-11-19 01:18:29	MRI,CT	rid2085	Alzheimer	donepezil	Follow Mind Diet, Should Have <4 Servings A Week Of Red Meat, Less Than A Tablespoon Of Butter A Day.
ehrid1439	Hospital2	patient1439	doctor2	Diarrhea	Loperamide, Bismuth	2020-12-26 05:42:29	Blood test,stool test,Clostridium difficile toxin test	rid1439	infections, travelers' diarrhea	subsalicylate	Avoid Dairy Products, Spicy Foods And All Citrus Foods And Alcohol.
ehrid245	Hospital2	patient245	doctor2	Common Cold	acetaminophen (Tylenol)	2020-06-13 22:03:15	No lab tests exist	rid245	Common Cold	acetaminophen	Wash Your Hands Often, Avoid Touching Your Face, Don't Smoke And Maintain A Healthy Life Style.
ehrid1919	Hospital2	patient1919	doctor2	Malaria	Chloroquine phosphate	2022-03-04 02:39:10	Malaria Rapid Diagnostic Test	rid1919	Malaria	Artemether/Lumfantrine Treatment	Drink Plenty Of Water, Control Fats Intake, Consume Ripe Papaya, Sweet Lime, Grapes Which Are Rich in Vitamin C
ehrid394	Hospital1	patient394	doctor1	Common Cold	acetaminophen (Tylenol)	2019-10-24 14:00:03	No lab tests exist	rid394	Common Cold	acetaminophen	Wash Your Hands Often, Avoid Touching Your Face, Don't Smoke And Maintain A Healthy Life Style.
ehrid298	Hospital1	patient298	doctor1	Common Cold	acetaminophen (Tylenol)	2019-05-04 09:25:11	No lab tests exist	rid298	Common Cold	acetaminophen	Wash Your Hands Often, Avoid Touching Your Face, Don't Smoke And Maintain A Healthy Life Style.
ehrid319	Hospital2	patient319	doctor2	Diabetes	Metformin 250mg -2 Nos	2022-09-21 08:27:06	HbA1C,Fasting Blood Sugar Test	rid319	Diabetes	Metformin 750mg -2 Nos	Regular Physical Activity - Success 30 Minutes A Day, Avoid Sugar, Ready To Eat Foods.
ehrid864	Hospital1	patient864	doctor1	HIV/AIDS	antiretroviral therapy (ART)	2022-01-21 18:49:48	Antigen/antibody tests	rid864	HIV/AIDS	antiretroviral therapy	Do Not Shoot Drugs, Avoid Sex And Do Not Breastfeed And Follow Balanced Diet.
ehrid355	Hospital2	patient355	doctor2	Common Cold	acetaminophen (Tylenol)	2022-11-05 05:12:53	No lab tests exist	rid355	Common Cold	acetaminophen	Wash Your Hands Often, Avoid Touching Your Face, Don't Smoke And Maintain A Healthy Life Style.
ehrid1425	Hospital2	patient1425	doctor2	Fever	paracetamol 500mg	2019-04-08 15:50:50	Blood Test and Urine Test	rid1425	Fever	Acetaminophen injection	Avoid Caffeine And Alcohol, Stay Hydrated, Have Ample Amount Of Rest.
ehrid1599	Hospital2	patient1599	doctor2	Lung Cancer	Afinitor Disperz	2021-08-30 01:01:03	PET-CT scan,Chest X-ray	rid1599	Lung Cancer	Everolimus	Avoid Smoking Or passive Smoking.
ehrid1250	Hospital1	patient1250	doctor1	Fever	paracetamol 500mg	2020-03-24 16:07:44	Blood Test and Urine Test	rid1250	Fever	Acetaminophen injection	Avoid Caffeine And Alcohol, Stay Hydrated, Have Ample Amount Of Rest.
ehrid1947	Hospital2	patient1947	doctor2	Diabetes	Metformin 250mg -2 Nos	2021-04-09 16:54:22	HbA1C,Fasting Blood Sugar Test	rid1947	Diabetes	Metformin 750mg -2 Nos	Regular Physical Activity - Success 30 Minutes A Day, Avoid Sugar, Ready To Eat Foods.
ehrid1704	Hospital1	patient1704	doctor1	Cirrhosis	ursodiol	2019-02-22 16:03:59	liver biopsy	rid1704	Cirrhosis	ursodiol	Eat Foods Like Lean Protein Poultry Or Fish, Strictly Avoid Alcohol.
ehrid1503	Hospital2	patient1503	doctor2	Asthma	Combination inhalers	2020-05-21 06:05:07	FeNO test, spirometry	rid1503	Asthma	Theophylline -2 Nos	Avoid Smoke of Any Type, Control Asthma Triggers.
ehrid1870	Hospital1	patient1870	doctor1	Diarrhea	Loperamide, Bismuth	2019-04-09 22:34:41	Blood test,stool test,Clostridium difficile toxin test	rid1870	infections, travelers' diarrhea	subsalicylate	Avoid Dairy Products, Spicy Foods And All Citrus Foods And Alcohol.
ehrid658	Hospital1	patient658	doctor1	Stroke	Aspirin 75mg,tPA	2022-04-30 02:56:42	CT ,MRI,Echocardiogram	rid658	Stroke	clopidogrel,dipyridamole	Avoid Sugar, Salt, Highly Processed Foods, Saturated And Trans Fats And Fried Foods.
ehrid1217	Hospital2	patient1217	doctor2	Diarrhea	Loperamide, Bismuth	2022-02-16 10:14:19	Blood test,stool test,Clostridium difficile toxin test	rid1217	infections, travelers' diarrhea	subsalicylate	Avoid Dairy Products, Spicy Foods And All Citrus Foods And Alcohol.
ehrid952	Hospital1	patient952	doctor1	Heart Disease	Aspirin 75mg,Pain Relieavers	2019-04-01 10:07:32	ECG,Blood Test,CT,MRI	rid952	Heart Disease	thrombolytics	Regular Physical Activity - Success 30 Minutes A Day, Avoid Saturated And Trans Fat And Fried Foods, As Well As Snacky-Type Foods.
ehrid1243	Hospital2	patient1243	doctor2	Diabetes	Metformin 250mg -2 Nos	2019-07-12 05:33:02	HbA1C,Fasting Blood Sugar Test	rid1243	Diabetes	Metformin 750mg -2 Nos	Regular Physical Activity - Success 30 Minutes A Day, Avoid Sugar, Ready To Eat Foods.
ehrid1178	Hospital1	patient1178	doctor1	Malaria	Chloroquine phosphate	2020-09-29 02:20:15	Malaria Rapid Diagnostic Test	rid1178	Malaria	Artemether/Lumfantrine Treatment	Drink Plenty Of Water, Control Fats Intake, Consume Ripe Papaya, Sweet Lime, Grapes Which Are Rich in Vitamin C
ehrid1328	Hospital1	patient1328	doctor1	Tuberculosis	Rifater >600mg	2020-10-24 21:48:24	Rapid Sputum Test,T-Spot	rid1328	Tuberculosis	Isoniazid INH pills for 6/9 months	Skip Tobacco In All Forms , Don't Consume Alchohol And Limit Caffeinated Drinks.
ehrid819	Hospital2	patient819	doctor2	Stomach Cancer	5-FU (fluorouracil) and leucovorin (folinic acid)	2022-07-16 02:20:34	Upper endoscopy	rid819	Stomach Cancer	chemotherapy	Choose Low-Fat Diary Products, Protien-Rich Foods.
ehrid2185	Hospital2	patient2185	doctor2	Heart Disease	Aspirin 75mg,Pain Relieavers	2019-02-12 01:09:14	ECG,Blood Test,CT,MRI	rid2196	Heart Disease and Hypertension	thrombolytics	Regular Physical Activity - Success 30 Minutes A Day, Avoid Saturated And Trans Fat And Fried Foods, As Well As Snacky-Type Foods.
ehrid447	Hospital2	patient447	doctor2	Common Cold	acetaminophen (Tylenol)	2022-02-20 04:45:52	No lab tests exist	rid447	Common Cold	acetaminophen	Wash Your Hands Often, Avoid Touching Your Face, Don't Smoke And Maintain A Healthy Life Style.
ehrid851	Hospital2	patient851	doctor2	Common Cold	acetaminophen (Tylenol)	2019-06-10 16:20:55	No lab tests exist	rid851	Common Cold	acetaminophen	Wash Your Hands Often, Avoid Touching Your Face, Don't Smoke And Maintain A Healthy Life Style.
ehrid159	Hospital2	patient159	doctor2	Common Cold	acetaminophen (Tylenol)	2019-08-22 19:32:02	No lab tests exist	rid159	Common Cold	acetaminophen	Wash Your Hands Often, Avoid Touching Your Face, Don't Smoke And Maintain A Healthy Life Style.
ehrid345	Hospital2	patient345	doctor2	Common Cold	acetaminophen (Tylenol)	2021-05-17 15:29:43	No lab tests exist	rid345	Common Cold	acetaminophen	Wash Your Hands Often, Avoid Touching Your Face, Don't Smoke And Maintain A Healthy Life Style.
ehrid2004	Hospital1	patient2004	doctor1	Cirrhosis	ursodiol	2021-09-12 00:50:34	liver biopsy	rid2004	Cirrhosis	ursodiol	Eat Foods Like Lean Protein Poultry Or Fish, Strictly Avoid Alcohol.
ehrid575	Hospital2	patient575	doctor2	Fever	paracetamol 500mg	2021-03-17 02:59:29	Blood Test and Urine Test	rid575	Fever	Acetaminophen injection	Avoid Caffeine And Alcohol, Stay Hydrated, Have Ample Amount Of Rest.
ehrid1084	Hospital1	patient1084	doctor1	Diarrhea	Loperamide, Bismuth	2019-03-02 15:14:44	Blood test,stool test,Clostridium difficile toxin test	rid1084	infections, travelers' diarrhea	subsalicylate	Avoid Dairy Products, Spicy Foods And All Citrus Foods And Alcohol.
ehrid1119	Hospital2	patient1119	doctor2	Diarrhea	Loperamide, Bismuth	2021-05-20 13:03:28	Blood test,stool test,Clostridium difficile toxin test	rid1119	infections, travelers' diarrhea	subsalicylate	Avoid Dairy Products, Spicy Foods And All Citrus Foods And Alcohol.
ehrid1585	Hospital2	patient1585	doctor2	Diarrhea	Loperamide, Bismuth	2021-09-03 07:25:59	Blood test,stool test,Clostridium difficile toxin test	rid1585	infections, travelers' diarrhea	subsalicylate	Avoid Dairy Products, Spicy Foods And All Citrus Foods And Alcohol.
ehrid243	Hospital2	patient243	doctor2	Asthma	Combination inhalers	2021-07-26 03:02:03	FeNO test, spirometry	rid243	Asthma	Theophylline -2 Nos	Avoid Smoke of Any Type, Control Asthma Triggers.
ehrid1974	Hospital1	patient1974	doctor1	Stomach Cancer	5-FU (fluorouracil) and leucovorin (folinic acid)	2021-03-05 11:55:04	Upper endoscopy	rid1974	Stomach Cancer	chemotherapy	Choose Low-Fat Diary Products, Protien-Rich Foods.
ehrid1932	Hospital1	patient1932	doctor1	Common Cold	acetaminophen (Tylenol)	2020-10-29 09:07:53	No lab tests exist	rid1932	Common Cold	acetaminophen	Wash Your Hands Often, Avoid Touching Your Face, Don't Smoke And Maintain A Healthy Life Style.
ehrid1888	Hospital1	patient1888	doctor1	Tuberculosis	Rifater >600mg	2022-07-10 23:10:48	Rapid Sputum Test,T-Spot	rid1888	Tuberculosis	Isoniazid INH pills for 6/9 months	Skip Tobacco In All Forms , Don't Consume Alchohol And Limit Caffeinated Drinks.
ehrid1913	Hospital2	patient1913	doctor2	Diarrhea	Loperamide, Bismuth	2022-05-23 21:18:08	Blood test,stool test,Clostridium difficile toxin test	rid1913	infections, travelers' diarrhea	subsalicylate	Avoid Dairy Products, Spicy Foods And All Citrus Foods And Alcohol.
ehrid2037	Hospital2	patient2037	doctor2	Stomach Cancer	5-FU (fluorouracil) and leucovorin (folinic acid)	2020-07-23 19:03:07	Upper endoscopy	rid2037	Stomach Cancer	chemotherapy	Choose Low-Fat Diary Products, Protien-Rich Foods.
ehrid286	Hospital1	patient286	doctor1	Lung Cancer	Afinitor Disperz	2020-09-26 05:43:05	PET-CT scan,Chest X-ray	rid286	Lung Cancer	Everolimus	Avoid Smoking Or passive Smoking.
ehrid2015	Hospital2	patient2015	doctor2	Lung Cancer	Afinitor Disperz	2019-07-08 22:43:53	PET-CT scan,Chest X-ray	rid2015	Lung Cancer	Everolimus	Avoid Smoking Or passive Smoking.
ehrid300	Hospital1	patient300	doctor1	Fever	paracetamol 500mg	2022-04-23 00:22:13	Blood Test and Urine Test	rid300	Fever	Acetaminophen injection	Avoid Caffeine And Alcohol, Stay Hydrated, Have Ample Amount Of Rest.
ehrid1708	Hospital1	patient1708	doctor1	Stroke	Aspirin 75mg,tPA	2020-03-20 11:44:24	CT ,MRI,Echocardiogram	rid1708	Stroke	clopidogrel,dipyridamole	Avoid Sugar, Salt, Highly Processed Foods, Saturated And Trans Fats And Fried Foods.
ehrid2053	Hospital2	patient2053	doctor2	Diarrhea	Loperamide, Bismuth	2020-05-22 13:06:40	Blood test,stool test,Clostridium difficile toxin test	rid2053	infections, travelers' diarrhea	subsalicylate	Avoid Dairy Products, Spicy Foods And All Citrus Foods And Alcohol.
ehrid527	Hospital2	patient527	doctor2	Heart Disease	Aspirin 75mg,Pain Relieavers	2020-04-04 14:48:18	ECG,Blood Test,CT,MRI	rid527	Heart Disease	thrombolytics	Regular Physical Activity - Success 30 Minutes A Day, Avoid Saturated And Trans Fat And Fried Foods, As Well As Snacky-Type Foods.
ehrid44	Hospital1	patient44	doctor1	Diabetes	Metformin 250mg -2 Nos	2022-02-23 20:53:14	HbA1C,Fasting Blood Sugar Test	rid44	Diabetes and Chorestrol	Metformin 750mg -2 Nos	Regular Physical Activity - Success 30 Minutes A Day, Avoid Sugar, Ready To Eat Foods.
ehrid1829	Hospital2	patient1829	doctor2	Diarrhea	Loperamide, Bismuth	2021-06-23 20:11:26	Blood test,stool test,Clostridium difficile toxin test	rid1829	infections, travelers' diarrhea	subsalicylate	Avoid Dairy Products, Spicy Foods And All Citrus Foods And Alcohol.
ehrid1094	Hospital1	patient1094	doctor1	Diarrhea	Loperamide, Bismuth	2020-09-27 06:17:44	Blood test,stool test,Clostridium difficile toxin test	rid1094	infections, travelers' diarrhea	subsalicylate	Avoid Dairy Products, Spicy Foods And All Citrus Foods And Alcohol.
ehrid399	Hospital2	patient399	doctor2	Stomach Cancer	5-FU (fluorouracil) and leucovorin (folinic acid)	2021-12-11 12:23:46	Upper endoscopy	rid399	Stomach Cancer	chemotherapy	Choose Low-Fat Diary Products, Protien-Rich Foods.
ehrid902	Hospital1	patient902	doctor1	Diabetes	Metformin 250mg -2 Nos	2021-07-26 11:54:06	HbA1C,Fasting Blood Sugar Test	rid902	Diabetes	Metformin 750mg -2 Nos	Regular Physical Activity - Success 30 Minutes A Day, Avoid Sugar, Ready To Eat Foods.
ehrid991	Hospital2	patient991	doctor2	Common Cold	acetaminophen (Tylenol)	2021-02-17 12:52:08	No lab tests exist	rid991	Common Cold	acetaminophen	Wash Your Hands Often, Avoid Touching Your Face, Don't Smoke And Maintain A Healthy Life Style.
ehrid824	Hospital1	patient824	doctor1	Common Cold	acetaminophen (Tylenol)	2019-05-23 13:18:46	No lab tests exist	rid824	Common Cold	acetaminophen	Wash Your Hands Often, Avoid Touching Your Face, Don't Smoke And Maintain A Healthy Life Style.
ehrid827	Hospital2	patient827	doctor2	Common Cold	acetaminophen (Tylenol)	2019-03-12 12:48:18	No lab tests exist	rid827	Common Cold	acetaminophen	Wash Your Hands Often, Avoid Touching Your Face, Don't Smoke And Maintain A Healthy Life Style.
ehrid1068	Hospital1	patient1068	doctor1	Cirrhosis	ursodiol	2019-08-11 22:52:26	liver biopsy	rid1068	Cirrhosis	ursodiol	Eat Foods Like Lean Protein Poultry Or Fish, Strictly Avoid Alcohol.
ehrid627	Hospital2	patient627	doctor2	Malaria	Chloroquine phosphate	2022-05-29 11:15:19	Malaria Rapid Diagnostic Test	rid627	Malaria	Artemether/Lumfantrine Treatment	Drink Plenty Of Water, Control Fats Intake, Consume Ripe Papaya, Sweet Lime, Grapes Which Are Rich in Vitamin C
ehrid397	Hospital2	patient397	doctor2	Common Cold	acetaminophen (Tylenol)	2020-08-19 06:01:44	No lab tests exist	rid397	Common Cold	acetaminophen	Wash Your Hands Often, Avoid Touching Your Face, Don't Smoke And Maintain A Healthy Life Style.
ehrid2181	Hospital2	patient2181	doctor2	Heart Disease	Aspirin 75mg,Pain Relieavers	2019-10-19 23:41:08	ECG,Blood Test,CT,MRI	rid2199	Heart Disease and Hypertension	thrombolytics	Regular Physical Activity - Success 30 Minutes A Day, Avoid Saturated And Trans Fat And Fried Foods, As Well As Snacky-Type Foods.
ehrid1008	Hospital1	patient1008	doctor1	Stomach Cancer	5-FU (fluorouracil) and leucovorin (folinic acid)	2020-02-02 15:41:35	Upper endoscopy	rid1008	Stomach Cancer	chemotherapy	Choose Low-Fat Diary Products, Protien-Rich Foods.
ehrid324	Hospital1	patient324	doctor1	HIV/AIDS	antiretroviral therapy (ART)	2022-02-14 10:12:43	Antigen/antibody tests	rid324	HIV/AIDS	antiretroviral therapy	Do Not Shoot Drugs, Avoid Sex And Do Not Breastfeed And Follow Balanced Diet.
ehrid1009	Hospital2	patient1009	doctor2	Diarrhea	Loperamide, Bismuth	2019-02-08 04:22:54	Blood test,stool test,Clostridium difficile toxin test	rid1009	infections, travelers' diarrhea	subsalicylate	Avoid Dairy Products, Spicy Foods And All Citrus Foods And Alcohol.
ehrid1344	Hospital1	patient1344	doctor1	Stomach Cancer	5-FU (fluorouracil) and leucovorin (folinic acid)	2019-02-17 13:37:14	Upper endoscopy	rid1344	Stomach Cancer	chemotherapy	Choose Low-Fat Diary Products, Protien-Rich Foods.
ehrid387	Hospital2	patient387	doctor2	Asthma	Combination inhalers	2022-09-26 22:11:42	FeNO test, spirometry	rid387	Asthma	Theophylline -2 Nos	Avoid Smoke of Any Type, Control Asthma Triggers.
ehrid1634	Hospital1	patient1634	doctor1	Malaria	Chloroquine phosphate	2021-12-31 08:36:30	Malaria Rapid Diagnostic Test	rid1634	Malaria	Artemether/Lumfantrine Treatment	Drink Plenty Of Water, Control Fats Intake, Consume Ripe Papaya, Sweet Lime, Grapes Which Are Rich in Vitamin C
ehrid1760	Hospital1	patient1760	doctor1	Diarrhea	Loperamide, Bismuth	2020-02-09 06:26:29	Blood test,stool test,Clostridium difficile toxin test	rid1760	infections, travelers' diarrhea	subsalicylate	Avoid Dairy Products, Spicy Foods And All Citrus Foods And Alcohol.
ehrid1551	Hospital2	patient1551	doctor2	Diabetes	Metformin 250mg -2 Nos	2020-05-08 18:40:09	HbA1C,Fasting Blood Sugar Test	rid1551	Diabetes	Metformin 750mg -2 Nos	Regular Physical Activity - Success 30 Minutes A Day, Avoid Sugar, Ready To Eat Foods.
ehrid617	Hospital2	patient617	doctor2	Common Cold	acetaminophen (Tylenol)	2020-09-16 08:54:58	No lab tests exist	rid617	Common Cold	acetaminophen	Wash Your Hands Often, Avoid Touching Your Face, Don't Smoke And Maintain A Healthy Life Style.
ehrid702	Hospital1	patient702	doctor1	HIV/AIDS	antiretroviral therapy (ART)	2022-01-03 02:13:05	Antigen/antibody tests	rid702	HIV/AIDS	antiretroviral therapy	Do Not Shoot Drugs, Avoid Sex And Do Not Breastfeed And Follow Balanced Diet.
ehrid218	Hospital1	patient218	doctor1	Common Cold	acetaminophen (Tylenol)	2022-06-20 19:12:34	No lab tests exist	rid218	Common Cold	acetaminophen	Wash Your Hands Often, Avoid Touching Your Face, Don't Smoke And Maintain A Healthy Life Style.
ehrid1086	Hospital1	patient1086	doctor1	Diarrhea	Loperamide, Bismuth	2022-03-03 01:10:10	Blood test,stool test,Clostridium difficile toxin test	rid1086	infections, travelers' diarrhea	subsalicylate	Avoid Dairy Products, Spicy Foods And All Citrus Foods And Alcohol.
ehrid915	Hospital2	patient915	doctor2	Alzheimer	Galantamine, rivastigmine	2019-01-27 11:54:34	MRI,CT	rid915	Alzheimer	donepezil	Follow Mind Diet, Should Have <4 Servings A Week Of Red Meat, Less Than A Tablespoon Of Butter A Day.
ehrid363	Hospital2	patient363	doctor2	Diabetes	Metformin 250mg -2 Nos	2019-07-19 22:17:08	HbA1C,Fasting Blood Sugar Test	rid363	Diabetes	Metformin 750mg -2 Nos	Regular Physical Activity - Success 30 Minutes A Day, Avoid Sugar, Ready To Eat Foods.
ehrid1290	Hospital1	patient1290	doctor1	Diarrhea	Loperamide, Bismuth	2021-04-24 11:01:15	Blood test,stool test,Clostridium difficile toxin test	rid1290	infections, travelers' diarrhea	subsalicylate	Avoid Dairy Products, Spicy Foods And All Citrus Foods And Alcohol.
ehrid349	Hospital2	patient349	doctor2	Common Cold	acetaminophen (Tylenol)	2019-10-21 17:21:15	No lab tests exist	rid349	Common Cold	acetaminophen	Wash Your Hands Often, Avoid Touching Your Face, Don't Smoke And Maintain A Healthy Life Style.
ehrid1581	Hospital2	patient1581	doctor2	Heart Disease	Aspirin 75mg,Pain Relieavers	2019-06-09 06:28:06	ECG,Blood Test,CT,MRI	rid1581	Heart Disease	thrombolytics	Regular Physical Activity - Success 30 Minutes A Day, Avoid Saturated And Trans Fat And Fried Foods, As Well As Snacky-Type Foods.
ehrid2008	Hospital1	patient2008	doctor1	Diarrhea	Loperamide, Bismuth	2021-03-14 20:08:42	Blood test,stool test,Clostridium difficile toxin test	rid2008	infections, travelers' diarrhea	subsalicylate	Avoid Dairy Products, Spicy Foods And All Citrus Foods And Alcohol.
ehrid1356	Hospital1	patient1356	doctor1	Cirrhosis	ursodiol	2022-05-03 12:46:22	liver biopsy	rid1356	Cirrhosis	ursodiol	Eat Foods Like Lean Protein Poultry Or Fish, Strictly Avoid Alcohol.
ehrid796	Hospital1	patient796	doctor1	Common Cold	acetaminophen (Tylenol)	2019-07-29 07:27:35	No lab tests exist	rid796	Common Cold	acetaminophen	Wash Your Hands Often, Avoid Touching Your Face, Don't Smoke And Maintain A Healthy Life Style.
ehrid2061	Hospital2	patient2061	doctor2	Asthma	Combination inhalers	2022-07-01 07:09:17	FeNO test, spirometry	rid2061	Asthma	Theophylline -2 Nos	Avoid Smoke of Any Type, Control Asthma Triggers.
ehrid433	Hospital2	patient433	doctor2	Common Cold	acetaminophen (Tylenol)	2021-07-22 19:19:26	No lab tests exist	rid433	Common Cold	acetaminophen	Wash Your Hands Often, Avoid Touching Your Face, Don't Smoke And Maintain A Healthy Life Style.
ehrid31	Hospital2	patient31	doctor2	Common Cold	acetaminophen (Tylenol)	2019-08-22 11:18:52	No lab tests exist	rid31	Common Cold and Fever	acetaminophen	Wash Your Hands Often, Avoid Touching Your Face, Don't Smoke And Maintain A Healthy Life Style.
ehrid662	Hospital1	patient662	doctor1	Common Cold	acetaminophen (Tylenol)	2020-12-31 11:51:11	No lab tests exist	rid662	Common Cold	acetaminophen	Wash Your Hands Often, Avoid Touching Your Face, Don't Smoke And Maintain A Healthy Life Style.
ehrid2113	Hospital1	patient2113	doctor2	Heart Disease	Aspirin 75mg,Pain Relieavers	2020-09-07 09:45:32	ECG,Blood Test,CT,MRI	rid2210	Heart Disease and Hypertension	thrombolytics	Regular Physical Activity - Success 30 Minutes A Day, Avoid Saturated And Trans Fat And Fried Foods, As Well As Snacky-Type Foods.
ehrid15	Hospital2	patient15	doctor2	Alzheimer	Galantamine, rivastigmine	2021-03-28 10:27:34	MRI,CT	rid15	Alzheimer and Dementia	donepezil	Follow Mind Diet, Should Have <4 Servings A Week Of Red Meat, Less Than A Tablespoon Of Butter A Day.
ehrid1220	Hospital1	patient1220	doctor1	Diarrhea	Loperamide, Bismuth	2022-09-29 21:48:02	Blood test,stool test,Clostridium difficile toxin test	rid1220	infections, travelers' diarrhea	subsalicylate	Avoid Dairy Products, Spicy Foods And All Citrus Foods And Alcohol.
ehrid1665	Hospital2	patient1665	doctor2	Asthma	Combination inhalers	2021-08-07 13:28:25	FeNO test, spirometry	rid1665	Asthma	Theophylline -2 Nos	Avoid Smoke of Any Type, Control Asthma Triggers.
ehrid2000	Hospital1	patient2000	doctor1	Fever	paracetamol 500mg	2020-06-20 20:09:12	Blood Test and Urine Test	rid2000	Fever	Acetaminophen injection	Avoid Caffeine And Alcohol, Stay Hydrated, Have Ample Amount Of Rest.
ehrid2007	Hospital2	patient2007	doctor2	Asthma	Combination inhalers	2021-10-22 22:24:36	FeNO test, spirometry	rid2007	Asthma	Theophylline -2 Nos	Avoid Smoke of Any Type, Control Asthma Triggers.
ehrid1983	Hospital2	patient1983	doctor2	Diarrhea	Loperamide, Bismuth	2020-02-09 15:14:29	Blood test,stool test,Clostridium difficile toxin test	rid1983	infections, travelers' diarrhea	subsalicylate	Avoid Dairy Products, Spicy Foods And All Citrus Foods And Alcohol.
ehrid1027	Hospital2	patient1027	doctor2	Lung Cancer	Afinitor Disperz	2019-01-04 12:45:59	PET-CT scan,Chest X-ray	rid1027	Lung Cancer	Everolimus	Avoid Smoking Or passive Smoking.
ehrid853	Hospital2	patient853	doctor2	Common Cold	acetaminophen (Tylenol)	2021-08-24 20:47:58	No lab tests exist	rid853	Common Cold	acetaminophen	Wash Your Hands Often, Avoid Touching Your Face, Don't Smoke And Maintain A Healthy Life Style.
ehrid510	Hospital1	patient510	doctor1	Diarrhea	Loperamide, Bismuth	2021-12-31 01:51:45	Blood test,stool test,Clostridium difficile toxin test	rid510	infections, travelers' diarrhea	subsalicylate	Avoid Dairy Products, Spicy Foods And All Citrus Foods And Alcohol.
ehrid643	Hospital2	patient643	doctor2	Common Cold	acetaminophen (Tylenol)	2021-08-14 07:44:09	No lab tests exist	rid643	Common Cold	acetaminophen	Wash Your Hands Often, Avoid Touching Your Face, Don't Smoke And Maintain A Healthy Life Style.
ehrid1464	Hospital1	patient1464	doctor1	Cirrhosis	ursodiol	2021-08-07 12:27:09	liver biopsy	rid1464	Cirrhosis	ursodiol	Eat Foods Like Lean Protein Poultry Or Fish, Strictly Avoid Alcohol.
ehrid2269	Hospital2	patient2269	doctor2	Heart Disease	Aspirin 75mg,Pain Relieavers	2019-01-10 04:09:03	ECG,Blood Test,CT,MRI	rid2164	Heart Disease and Hypertension	thrombolytics	Regular Physical Activity - Success 30 Minutes A Day, Avoid Saturated And Trans Fat And Fried Foods, As Well As Snacky-Type Foods.
ehrid411	Hospital2	patient411	doctor2	Common Cold	acetaminophen (Tylenol)	2021-10-06 05:18:46	No lab tests exist	rid411	Common Cold	acetaminophen	Wash Your Hands Often, Avoid Touching Your Face, Don't Smoke And Maintain A Healthy Life Style.
ehrid480	Hospital1	patient480	doctor1	Diarrhea	Loperamide, Bismuth	2020-03-28 19:52:20	Blood test,stool test,Clostridium difficile toxin test	rid480	infections, travelers' diarrhea	subsalicylate	Avoid Dairy Products, Spicy Foods And All Citrus Foods And Alcohol.
ehrid945	Hospital2	patient945	doctor2	Stomach Cancer	5-FU (fluorouracil) and leucovorin (folinic acid)	2019-09-16 17:08:25	Upper endoscopy	rid945	Stomach Cancer	chemotherapy	Choose Low-Fat Diary Products, Protien-Rich Foods.
ehrid1164	Hospital1	patient1164	doctor1	Cirrhosis	ursodiol	2020-09-18 22:10:30	liver biopsy	rid1164	Cirrhosis	ursodiol	Eat Foods Like Lean Protein Poultry Or Fish, Strictly Avoid Alcohol.
ehrid591	Hospital2	patient591	doctor2	Common Cold	acetaminophen (Tylenol)	2019-02-13 14:33:19	No lab tests exist	rid591	Common Cold	acetaminophen	Wash Your Hands Often, Avoid Touching Your Face, Don't Smoke And Maintain A Healthy Life Style.
ehrid1446	Hospital1	patient1446	doctor1	Diarrhea	Loperamide, Bismuth	2020-05-09 16:40:03	Blood test,stool test,Clostridium difficile toxin test	rid1446	infections, travelers' diarrhea	subsalicylate	Avoid Dairy Products, Spicy Foods And All Citrus Foods And Alcohol.
ehrid1406	Hospital1	patient1406	doctor1	Malaria	Chloroquine phosphate	2020-08-02 16:28:09	Malaria Rapid Diagnostic Test	rid1406	Malaria	Artemether/Lumfantrine Treatment	Drink Plenty Of Water, Control Fats Intake, Consume Ripe Papaya, Sweet Lime, Grapes Which Are Rich in Vitamin C
ehrid994	Hospital1	patient994	doctor1	Stroke	Aspirin 75mg,tPA	2020-12-04 02:48:56	CT ,MRI,Echocardiogram	rid994	Stroke	clopidogrel,dipyridamole	Avoid Sugar, Salt, Highly Processed Foods, Saturated And Trans Fats And Fried Foods.
ehrid1504	Hospital1	patient1504	doctor1	Tuberculosis	Rifater >600mg	2021-12-30 07:04:25	Rapid Sputum Test,T-Spot	rid1504	Tuberculosis	Isoniazid INH pills for 6/9 months	Skip Tobacco In All Forms , Don't Consume Alchohol And Limit Caffeinated Drinks.
ehrid1600	Hospital1	patient1600	doctor1	Fever	paracetamol 500mg	2021-12-19 07:45:29	Blood Test and Urine Test	rid1600	Fever	Acetaminophen injection	Avoid Caffeine And Alcohol, Stay Hydrated, Have Ample Amount Of Rest.
ehrid1491	Hospital2	patient1491	doctor2	Stomach Cancer	5-FU (fluorouracil) and leucovorin (folinic acid)	2020-05-19 18:08:56	Upper endoscopy	rid1491	Stomach Cancer	chemotherapy	Choose Low-Fat Diary Products, Protien-Rich Foods.
ehrid1147	Hospital2	patient1147	doctor2	Diarrhea	Loperamide, Bismuth	2022-03-14 07:10:38	Blood test,stool test,Clostridium difficile toxin test	rid1147	infections, travelers' diarrhea	subsalicylate	Avoid Dairy Products, Spicy Foods And All Citrus Foods And Alcohol.
ehrid1192	Hospital1	patient1192	doctor1	Diarrhea	Loperamide, Bismuth	2019-12-23 06:08:55	Blood test,stool test,Clostridium difficile toxin test	rid1192	infections, travelers' diarrhea	subsalicylate	Avoid Dairy Products, Spicy Foods And All Citrus Foods And Alcohol.
ehrid1000	Hospital1	patient1000	doctor1	Fever	paracetamol 500mg	2021-12-31 19:05:32	Blood Test and Urine Test	rid1000	Fever	Acetaminophen injection	Avoid Caffeine And Alcohol, Stay Hydrated, Have Ample Amount Of Rest.
ehrid197	Hospital2	patient197	doctor2	Common Cold	acetaminophen (Tylenol)	2020-03-29 21:32:40	No lab tests exist	rid197	Common Cold	acetaminophen	Wash Your Hands Often, Avoid Touching Your Face, Don't Smoke And Maintain A Healthy Life Style.
ehrid1181	Hospital2	patient1181	doctor2	Diarrhea	Loperamide, Bismuth	2019-08-06 15:46:45	Blood test,stool test,Clostridium difficile toxin test	rid1181	infections, travelers' diarrhea	subsalicylate	Avoid Dairy Products, Spicy Foods And All Citrus Foods And Alcohol.
ehrid1461	Hospital2	patient1461	doctor2	Diarrhea	Loperamide, Bismuth	2020-05-13 13:36:37	Blood test,stool test,Clostridium difficile toxin test	rid1461	infections, travelers' diarrhea	subsalicylate	Avoid Dairy Products, Spicy Foods And All Citrus Foods And Alcohol.
ehrid1668	Hospital1	patient1668	doctor1	Cirrhosis	ursodiol	2021-06-03 01:37:14	liver biopsy	rid1668	Cirrhosis	ursodiol	Eat Foods Like Lean Protein Poultry Or Fish, Strictly Avoid Alcohol.
ehrid1325	Hospital2	patient1325	doctor2	Fever	paracetamol 500mg	2021-03-03 10:01:50	Blood Test and Urine Test	rid1325	Fever	Acetaminophen injection	Avoid Caffeine And Alcohol, Stay Hydrated, Have Ample Amount Of Rest.
ehrid1240	Hospital1	patient1240	doctor1	Diarrhea	Loperamide, Bismuth	2020-07-01 13:50:09	Blood test,stool test,Clostridium difficile toxin test	rid1240	infections, travelers' diarrhea	subsalicylate	Avoid Dairy Products, Spicy Foods And All Citrus Foods And Alcohol.
ehrid309	Hospital2	patient309	doctor2	Common Cold	acetaminophen (Tylenol)	2019-10-05 11:42:04	No lab tests exist	rid309	Common Cold	acetaminophen	Wash Your Hands Often, Avoid Touching Your Face, Don't Smoke And Maintain A Healthy Life Style.
ehrid2033	Hospital2	patient2033	doctor2	Malaria	Chloroquine phosphate	2019-10-03 19:48:01	Malaria Rapid Diagnostic Test	rid2033	Malaria	Artemether/Lumfantrine Treatment	Drink Plenty Of Water, Control Fats Intake, Consume Ripe Papaya, Sweet Lime, Grapes Which Are Rich in Vitamin C
ehrid1774	Hospital1	patient1774	doctor1	Diarrhea	Loperamide, Bismuth	2022-05-24 21:13:01	Blood test,stool test,Clostridium difficile toxin test	rid1774	infections, travelers' diarrhea	subsalicylate	Avoid Dairy Products, Spicy Foods And All Citrus Foods And Alcohol.
ehrid2078	Hospital1	patient2078	doctor1	Diarrhea	Loperamide, Bismuth	2021-12-09 17:25:25	Blood test,stool test,Clostridium difficile toxin test	rid2078	infections, travelers' diarrhea	subsalicylate	Avoid Dairy Products, Spicy Foods And All Citrus Foods And Alcohol.
ehrid665	Hospital2	patient665	doctor2	Malaria	Chloroquine phosphate	2021-03-14 20:07:05	Malaria Rapid Diagnostic Test	rid665	Malaria	Artemether/Lumfantrine Treatment	Drink Plenty Of Water, Control Fats Intake, Consume Ripe Papaya, Sweet Lime, Grapes Which Are Rich in Vitamin C
ehrid1529	Hospital2	patient1529	doctor2	Diabetes	Metformin 250mg -2 Nos	2021-09-02 02:36:29	HbA1C,Fasting Blood Sugar Test	rid1529	Diabetes	Metformin 750mg -2 Nos	Regular Physical Activity - Success 30 Minutes A Day, Avoid Sugar, Ready To Eat Foods.
ehrid80	Hospital1	patient80	doctor1	Diarrhea	Loperamide, Bismuth	2019-04-18 04:03:49	Blood test,stool test,Clostridium difficile toxin test	rid80	infections, travelers' diarrhea	subsalicylate	Avoid Dairy Products, Spicy Foods And All Citrus Foods And Alcohol.
ehrid2219	Hospital2	patient2219	doctor2	Heart Disease	Aspirin 75mg,Pain Relieavers	2019-12-23 03:15:09	ECG,Blood Test,CT,MRI	rid2117	Heart Disease and Hypertension	thrombolytics	Regular Physical Activity - Success 30 Minutes A Day, Avoid Saturated And Trans Fat And Fried Foods, As Well As Snacky-Type Foods.
ehrid1115	Hospital2	patient1115	doctor2	Diarrhea	Loperamide, Bismuth	2020-01-17 01:35:57	Blood test,stool test,Clostridium difficile toxin test	rid1115	infections, travelers' diarrhea	subsalicylate	Avoid Dairy Products, Spicy Foods And All Citrus Foods And Alcohol.
ehrid390	Hospital1	patient390	doctor1	Diarrhea	Loperamide, Bismuth	2019-05-20 10:05:06	Blood test,stool test,Clostridium difficile toxin test	rid390	infections, travelers' diarrhea	subsalicylate	Avoid Dairy Products, Spicy Foods And All Citrus Foods And Alcohol.
ehrid619	Hospital2	patient619	doctor2	Common Cold	acetaminophen (Tylenol)	2021-03-01 01:55:07	No lab tests exist	rid619	Common Cold	acetaminophen	Wash Your Hands Often, Avoid Touching Your Face, Don't Smoke And Maintain A Healthy Life Style.
ehrid536	Hospital1	patient536	doctor1	Common Cold	acetaminophen (Tylenol)	2020-11-06 20:26:48	No lab tests exist	rid536	Common Cold	acetaminophen	Wash Your Hands Often, Avoid Touching Your Face, Don't Smoke And Maintain A Healthy Life Style.
ehrid2253	Hospital2	patient2253	doctor2	Heart Disease	Aspirin 75mg,Pain Relieavers	2022-12-11 06:03:43	ECG,Blood Test,CT,MRI	rid2229	Heart Disease and Hypertension	thrombolytics	Regular Physical Activity - Success 30 Minutes A Day, Avoid Saturated And Trans Fat And Fried Foods, As Well As Snacky-Type Foods.
ehrid1587	Hospital2	patient1587	doctor2	Common Cold	acetaminophen (Tylenol)	2019-06-09 09:20:38	No lab tests exist	rid1587	Common Cold	acetaminophen	Wash Your Hands Often, Avoid Touching Your Face, Don't Smoke And Maintain A Healthy Life Style.
ehrid2177	Hospital1	patient2177	doctor2	Heart Disease	Aspirin 75mg,Pain Relieavers	2020-02-22 04:56:13	ECG,Blood Test,CT,MRI	rid2225	Heart Disease and Hypertension	thrombolytics	Regular Physical Activity - Success 30 Minutes A Day, Avoid Saturated And Trans Fat And Fried Foods, As Well As Snacky-Type Foods.
ehrid29	Hospital2	patient29	doctor2	Common Cold	acetaminophen (Tylenol)	2020-07-05 11:32:46	No lab tests exist	rid29	Common Cold and Fever	acetaminophen	Wash Your Hands Often, Avoid Touching Your Face, Don't Smoke And Maintain A Healthy Life Style.
ehrid836	Hospital1	patient836	doctor1	Malaria	Chloroquine phosphate	2019-10-26 05:04:09	Malaria Rapid Diagnostic Test	rid836	Malaria	Artemether/Lumfantrine Treatment	Drink Plenty Of Water, Control Fats Intake, Consume Ripe Papaya, Sweet Lime, Grapes Which Are Rich in Vitamin C
ehrid1304	Hospital1	patient1304	doctor1	Diarrhea	Loperamide, Bismuth	2020-04-13 00:31:24	Blood test,stool test,Clostridium difficile toxin test	rid1304	infections, travelers' diarrhea	subsalicylate	Avoid Dairy Products, Spicy Foods And All Citrus Foods And Alcohol.
ehrid512	Hospital1	patient512	doctor1	Tuberculosis	Rifater >600mg	2020-04-26 10:18:02	Rapid Sputum Test,T-Spot	rid512	Tuberculosis	Isoniazid INH pills for 6/9 months	Skip Tobacco In All Forms , Don't Consume Alchohol And Limit Caffeinated Drinks.
ehrid1867	Hospital2	patient1867	doctor2	Diarrhea	Loperamide, Bismuth	2020-08-20 07:57:03	Blood test,stool test,Clostridium difficile toxin test	rid1867	infections, travelers' diarrhea	subsalicylate	Avoid Dairy Products, Spicy Foods And All Citrus Foods And Alcohol.
ehrid329	Hospital2	patient329	doctor2	Common Cold	acetaminophen (Tylenol)	2022-04-24 19:00:30	No lab tests exist	rid329	Common Cold	acetaminophen	Wash Your Hands Often, Avoid Touching Your Face, Don't Smoke And Maintain A Healthy Life Style.
ehrid144	Hospital1	patient144	doctor1	HIV/AIDS	antiretroviral therapy (ART)	2020-10-04 08:51:51	Antigen/antibody tests	rid144	HIV/AIDS	antiretroviral therapy	Do Not Shoot Drugs, Avoid Sex And Do Not Breastfeed And Follow Balanced Diet.
ehrid1781	Hospital2	patient1781	doctor2	Lung Cancer	Afinitor Disperz	2021-01-06 22:44:12	PET-CT scan,Chest X-ray	rid1781	Lung Cancer	Everolimus	Avoid Smoking Or passive Smoking.
ehrid620	Hospital1	patient620	doctor1	Diarrhea	Loperamide, Bismuth	2022-07-04 14:30:47	Blood test,stool test,Clostridium difficile toxin test	rid620	infections, travelers' diarrhea	subsalicylate	Avoid Dairy Products, Spicy Foods And All Citrus Foods And Alcohol.
ehrid253	Hospital2	patient253	doctor2	Common Cold	acetaminophen (Tylenol)	2022-12-26 22:54:36	No lab tests exist	rid253	Common Cold	acetaminophen	Wash Your Hands Often, Avoid Touching Your Face, Don't Smoke And Maintain A Healthy Life Style.
ehrid1844	Hospital1	patient1844	doctor1	Diarrhea	Loperamide, Bismuth	2020-01-24 16:44:38	Blood test,stool test,Clostridium difficile toxin test	rid1844	infections, travelers' diarrhea	subsalicylate	Avoid Dairy Products, Spicy Foods And All Citrus Foods And Alcohol.
ehrid452	Hospital1	patient452	doctor1	Common Cold	acetaminophen (Tylenol)	2021-11-14 09:10:54	No lab tests exist	rid452	Common Cold	acetaminophen	Wash Your Hands Often, Avoid Touching Your Face, Don't Smoke And Maintain A Healthy Life Style.
ehrid1593	Hospital2	patient1593	doctor2	Asthma	Combination inhalers	2020-11-25 15:37:07	FeNO test, spirometry	rid1593	Asthma	Theophylline -2 Nos	Avoid Smoke of Any Type, Control Asthma Triggers.
ehrid1849	Hospital2	patient1849	doctor2	Diarrhea	Loperamide, Bismuth	2022-09-13 07:28:56	Blood test,stool test,Clostridium difficile toxin test	rid1849	infections, travelers' diarrhea	subsalicylate	Avoid Dairy Products, Spicy Foods And All Citrus Foods And Alcohol.
ehrid735	Hospital2	patient735	doctor2	Stomach Cancer	5-FU (fluorouracil) and leucovorin (folinic acid)	2020-09-07 18:06:25	Upper endoscopy	rid735	Stomach Cancer	chemotherapy	Choose Low-Fat Diary Products, Protien-Rich Foods.
ehrid486	Hospital1	patient486	doctor1	HIV/AIDS	antiretroviral therapy (ART)	2022-08-14 20:14:21	Antigen/antibody tests	rid486	HIV/AIDS	antiretroviral therapy	Do Not Shoot Drugs, Avoid Sex And Do Not Breastfeed And Follow Balanced Diet.
ehrid1753	Hospital2	patient1753	doctor2	Diarrhea	Loperamide, Bismuth	2021-06-05 10:17:10	Blood test,stool test,Clostridium difficile toxin test	rid1753	infections, travelers' diarrhea	subsalicylate	Avoid Dairy Products, Spicy Foods And All Citrus Foods And Alcohol.
ehrid1748	Hospital1	patient1748	doctor1	Common Cold	acetaminophen (Tylenol)	2021-02-16 04:53:48	No lab tests exist	rid1748	Common Cold	acetaminophen	Wash Your Hands Often, Avoid Touching Your Face, Don't Smoke And Maintain A Healthy Life Style.
ehrid2101	Hospital2	patient2101	doctor2	Heart Disease	Aspirin 75mg,Pain Relieavers	2022-07-31 23:50:21	ECG,Blood Test,CT,MRI	rid2238	Heart Disease and Hypertension	thrombolytics	Regular Physical Activity - Success 30 Minutes A Day, Avoid Saturated And Trans Fat And Fried Foods, As Well As Snacky-Type Foods.
ehrid263	Hospital2	patient263	doctor2	Common Cold	acetaminophen (Tylenol)	2022-01-06 10:27:55	No lab tests exist	rid263	Common Cold	acetaminophen	Wash Your Hands Often, Avoid Touching Your Face, Don't Smoke And Maintain A Healthy Life Style.
ehrid1184	Hospital1	patient1184	doctor1	Tuberculosis	Rifater >600mg	2020-05-07 03:47:31	Rapid Sputum Test,T-Spot	rid1184	Tuberculosis	Isoniazid INH pills for 6/9 months	Skip Tobacco In All Forms , Don't Consume Alchohol And Limit Caffeinated Drinks.
ehrid676	Hospital1	patient676	doctor1	Lung Cancer	Afinitor Disperz	2020-04-05 15:54:12	PET-CT scan,Chest X-ray	rid676	Lung Cancer	Everolimus	Avoid Smoking Or passive Smoking.
ehrid2044	Hospital1	patient2044	doctor1	Stroke	Aspirin 75mg,tPA	2019-11-24 10:07:37	CT ,MRI,Echocardiogram	rid2044	Stroke	clopidogrel,dipyridamole	Avoid Sugar, Salt, Highly Processed Foods, Saturated And Trans Fats And Fried Foods.
ehrid1643	Hospital2	patient1643	doctor2	Diarrhea	Loperamide, Bismuth	2022-12-05 04:18:02	Blood test,stool test,Clostridium difficile toxin test	rid1643	infections, travelers' diarrhea	subsalicylate	Avoid Dairy Products, Spicy Foods And All Citrus Foods And Alcohol.
ehrid1840	Hospital1	patient1840	doctor1	Common Cold	acetaminophen (Tylenol)	2019-09-29 23:17:57	No lab tests exist	rid1840	Common Cold	acetaminophen	Wash Your Hands Often, Avoid Touching Your Face, Don't Smoke And Maintain A Healthy Life Style.
ehrid1450	Hospital1	patient1450	doctor1	Fever	paracetamol 500mg	2021-08-31 15:18:07	Blood Test and Urine Test	rid1450	Fever	Acetaminophen injection	Avoid Caffeine And Alcohol, Stay Hydrated, Have Ample Amount Of Rest.
ehrid1365	Hospital2	patient1365	doctor2	Stomach Cancer	5-FU (fluorouracil) and leucovorin (folinic acid)	2022-03-01 09:33:07	Upper endoscopy	rid1365	Stomach Cancer	chemotherapy	Choose Low-Fat Diary Products, Protien-Rich Foods.
ehrid1309	Hospital2	patient1309	doctor2	Heart Disease	Aspirin 75mg,Pain Relieavers	2021-01-27 16:08:27	ECG,Blood Test,CT,MRI	rid1309	Heart Disease	thrombolytics	Regular Physical Activity - Success 30 Minutes A Day, Avoid Saturated And Trans Fat And Fried Foods, As Well As Snacky-Type Foods.
ehrid315	Hospital2	patient315	doctor2	Stomach Cancer	5-FU (fluorouracil) and leucovorin (folinic acid)	2019-01-06 04:07:23	Upper endoscopy	rid315	Stomach Cancer	chemotherapy	Choose Low-Fat Diary Products, Protien-Rich Foods.
ehrid1783	Hospital2	patient1783	doctor2	Diarrhea	Loperamide, Bismuth	2021-03-17 06:30:13	Blood test,stool test,Clostridium difficile toxin test	rid1783	infections, travelers' diarrhea	subsalicylate	Avoid Dairy Products, Spicy Foods And All Citrus Foods And Alcohol.
ehrid718	Hospital1	patient718	doctor1	Common Cold	acetaminophen (Tylenol)	2020-10-14 13:24:39	No lab tests exist	rid718	Common Cold	acetaminophen	Wash Your Hands Often, Avoid Touching Your Face, Don't Smoke And Maintain A Healthy Life Style.
ehrid838	Hospital1	patient838	doctor1	Common Cold	acetaminophen (Tylenol)	2019-06-16 06:43:09	No lab tests exist	rid838	Common Cold	acetaminophen	Wash Your Hands Often, Avoid Touching Your Face, Don't Smoke And Maintain A Healthy Life Style.
ehrid920	Hospital1	patient920	doctor1	Common Cold	acetaminophen (Tylenol)	2022-01-23 06:14:57	No lab tests exist	rid920	Common Cold	acetaminophen	Wash Your Hands Often, Avoid Touching Your Face, Don't Smoke And Maintain A Healthy Life Style.
ehrid1596	Hospital1	patient1596	doctor1	Stomach Cancer	5-FU (fluorouracil) and leucovorin (folinic acid)	2019-06-06 10:01:28	Upper endoscopy	rid1596	Stomach Cancer	chemotherapy	Choose Low-Fat Diary Products, Protien-Rich Foods.
ehrid1685	Hospital2	patient1685	doctor2	Diarrhea	Loperamide, Bismuth	2021-09-22 20:27:15	Blood test,stool test,Clostridium difficile toxin test	rid1685	infections, travelers' diarrhea	subsalicylate	Avoid Dairy Products, Spicy Foods And All Citrus Foods And Alcohol.
ehrid2244	Hospital1	patient2244	doctor1	Heart Disease	Aspirin 75mg,Pain Relieavers	2020-06-02 03:35:13	ECG,Blood Test,CT,MRI	rid2173	Heart Disease and Hypertension	thrombolytics	Regular Physical Activity - Success 30 Minutes A Day, Avoid Saturated And Trans Fat And Fried Foods, As Well As Snacky-Type Foods.
ehrid1846	Hospital1	patient1846	doctor1	Lung Cancer	Afinitor Disperz	2021-02-13 14:09:47	PET-CT scan,Chest X-ray	rid1846	Lung Cancer	Everolimus	Avoid Smoking Or passive Smoking.
ehrid653	Hospital2	patient653	doctor2	Common Cold	acetaminophen (Tylenol)	2020-09-29 04:49:39	No lab tests exist	rid653	Common Cold	acetaminophen	Wash Your Hands Often, Avoid Touching Your Face, Don't Smoke And Maintain A Healthy Life Style.
ehrid1921	Hospital2	patient1921	doctor2	Heart Disease	Aspirin 75mg,Pain Relieavers	2022-11-30 10:40:45	ECG,Blood Test,CT,MRI	rid1921	Heart Disease	thrombolytics	Regular Physical Activity - Success 30 Minutes A Day, Avoid Saturated And Trans Fat And Fried Foods, As Well As Snacky-Type Foods.
ehrid502	Hospital1	patient502	doctor1	Common Cold	acetaminophen (Tylenol)	2021-12-01 12:19:42	No lab tests exist	rid502	Common Cold	acetaminophen	Wash Your Hands Often, Avoid Touching Your Face, Don't Smoke And Maintain A Healthy Life Style.
ehrid367	Hospital2	patient367	doctor2	Common Cold	acetaminophen (Tylenol)	2019-05-01 11:54:26	No lab tests exist	rid367	Common Cold	acetaminophen	Wash Your Hands Often, Avoid Touching Your Face, Don't Smoke And Maintain A Healthy Life Style.
ehrid492	Hospital1	patient492	doctor1	Cirrhosis	ursodiol	2022-02-20 00:32:10	liver biopsy	rid492	Cirrhosis	ursodiol	Eat Foods Like Lean Protein Poultry Or Fish, Strictly Avoid Alcohol.
ehrid1855	Hospital2	patient1855	doctor2	Diarrhea	Loperamide, Bismuth	2021-03-19 13:00:40	Blood test,stool test,Clostridium difficile toxin test	rid1855	infections, travelers' diarrhea	subsalicylate	Avoid Dairy Products, Spicy Foods And All Citrus Foods And Alcohol.
ehrid1046	Hospital1	patient1046	doctor1	Diarrhea	Loperamide, Bismuth	2020-06-10 05:13:55	Blood test,stool test,Clostridium difficile toxin test	rid1046	infections, travelers' diarrhea	subsalicylate	Avoid Dairy Products, Spicy Foods And All Citrus Foods And Alcohol.
ehrid176	Hospital1	patient176	doctor1	Tuberculosis	Rifater >600mg	2020-12-11 06:03:14	Rapid Sputum Test,T-Spot	rid176	Tuberculosis	Isoniazid INH pills for 6/9 months	Skip Tobacco In All Forms , Don't Consume Alchohol And Limit Caffeinated Drinks.
ehrid1646	Hospital1	patient1646	doctor1	Diarrhea	Loperamide, Bismuth	2021-05-12 14:32:55	Blood test,stool test,Clostridium difficile toxin test	rid1646	infections, travelers' diarrhea	subsalicylate	Avoid Dairy Products, Spicy Foods And All Citrus Foods And Alcohol.
ehrid408	Hospital1	patient408	doctor1	Cirrhosis	ursodiol	2020-08-14 05:02:22	liver biopsy	rid408	Cirrhosis	ursodiol	Eat Foods Like Lean Protein Poultry Or Fish, Strictly Avoid Alcohol.
ehrid2129	Hospital2	patient2129	doctor2	Heart Disease	Aspirin 75mg,Pain Relieavers	2021-10-28 10:58:17	ECG,Blood Test,CT,MRI	rid2104	Heart Disease and Hypertension	thrombolytics	Regular Physical Activity - Success 30 Minutes A Day, Avoid Saturated And Trans Fat And Fried Foods, As Well As Snacky-Type Foods.
ehrid1531	Hospital2	patient1531	doctor2	Diarrhea	Loperamide, Bismuth	2019-05-13 08:54:02	Blood test,stool test,Clostridium difficile toxin test	rid1531	infections, travelers' diarrhea	subsalicylate	Avoid Dairy Products, Spicy Foods And All Citrus Foods And Alcohol.
ehrid1776	Hospital1	patient1776	doctor1	Cirrhosis	ursodiol	2020-12-22 19:53:47	liver biopsy	rid1776	Cirrhosis	ursodiol	Eat Foods Like Lean Protein Poultry Or Fish, Strictly Avoid Alcohol.
ehrid1139	Hospital2	patient1139	doctor2	Heart Disease	Aspirin 75mg,Pain Relieavers	2021-08-16 09:24:46	ECG,Blood Test,CT,MRI	rid1139	Heart Disease	thrombolytics	Regular Physical Activity - Success 30 Minutes A Day, Avoid Saturated And Trans Fat And Fried Foods, As Well As Snacky-Type Foods.
ehrid1741	Hospital2	patient1741	doctor2	Diarrhea	Loperamide, Bismuth	2022-08-02 16:33:20	Blood test,stool test,Clostridium difficile toxin test	rid1741	infections, travelers' diarrhea	subsalicylate	Avoid Dairy Products, Spicy Foods And All Citrus Foods And Alcohol.
ehrid964	Hospital1	patient964	doctor1	Common Cold	acetaminophen (Tylenol)	2020-08-05 00:52:24	No lab tests exist	rid964	Common Cold	acetaminophen	Wash Your Hands Often, Avoid Touching Your Face, Don't Smoke And Maintain A Healthy Life Style.
ehrid1152	Hospital1	patient1152	doctor1	HIV/AIDS	antiretroviral therapy (ART)	2019-04-13 09:18:40	Antigen/antibody tests	rid1152	HIV/AIDS	antiretroviral therapy	Do Not Shoot Drugs, Avoid Sex And Do Not Breastfeed And Follow Balanced Diet.
ehrid277	Hospital2	patient277	doctor2	Common Cold	acetaminophen (Tylenol)	2022-03-17 07:18:22	No lab tests exist	rid277	Common Cold	acetaminophen	Wash Your Hands Often, Avoid Touching Your Face, Don't Smoke And Maintain A Healthy Life Style.
ehrid1306	Hospital1	patient1306	doctor1	Diarrhea	Loperamide, Bismuth	2022-02-27 11:42:14	Blood test,stool test,Clostridium difficile toxin test	rid1306	infections, travelers' diarrhea	subsalicylate	Avoid Dairy Products, Spicy Foods And All Citrus Foods And Alcohol.
ehrid1487	Hospital2	patient1487	doctor2	Diarrhea	Loperamide, Bismuth	2019-02-02 16:20:58	Blood test,stool test,Clostridium difficile toxin test	rid1487	infections, travelers' diarrhea	subsalicylate	Avoid Dairy Products, Spicy Foods And All Citrus Foods And Alcohol.
ehrid343	Hospital2	patient343	doctor2	Common Cold	acetaminophen (Tylenol)	2022-01-18 23:12:37	No lab tests exist	rid343	Common Cold	acetaminophen	Wash Your Hands Often, Avoid Touching Your Face, Don't Smoke And Maintain A Healthy Life Style.
ehrid766	Hospital1	patient766	doctor1	Common Cold	acetaminophen (Tylenol)	2019-08-11 18:01:21	No lab tests exist	rid766	Common Cold	acetaminophen	Wash Your Hands Often, Avoid Touching Your Face, Don't Smoke And Maintain A Healthy Life Style.
ehrid776	Hospital1	patient776	doctor1	Common Cold	acetaminophen (Tylenol)	2019-01-20 22:49:46	No lab tests exist	rid776	Common Cold	acetaminophen	Wash Your Hands Often, Avoid Touching Your Face, Don't Smoke And Maintain A Healthy Life Style.
[truncated: 675 more rows]
